# Supplementary material for: Optimization Method of Reducing the Differential Settlements of Piled Raft Foundations Based on Pile‐to‐Pile Interaction Theory
Source: Hindawi journal article supplement (doi:10.1155/2020/1521876), 2020-01-01
Supplement: f1 [file 1521876.f1.zip]

Archive with 3 entries (2 files):
- Database/CASE-1-Figure 11-12.xlsx
- Database/CASE-2-Figure 13-14.xlsx
- Database/
