# Supplementary material for: Optimization Method of Reducing the Differential Settlements of Piled Raft Foundations Based on Pile‐to‐Pile Interaction Theory
Source: Hindawi journal article supplement (doi:10.1155/2020/1521876), 2020-01-01
Supplement: f1 [file 1521876.f1.zip › Database/CASE-1-Figure 11-12.xlsx]

## Sheet: Figure-11-a-b
300.407	309.377	-0.0414681
300.289	308.936	-0.0414473
300.838	308.878	-0.0414975
301.011	309.448	-0.0415188
295.907	309.376	-0.0410705
295.789	308.936	-0.041044
296.324	308.918	-0.0411311
296.449	309.53	-0.0411527
291.407	309.376	-0.0402419
291.289	308.936	-0.0402022
291.824	308.918	-0.0403555
291.949	309.53	-0.040389
286.907	309.376	-0.0387135
286.789	308.936	-0.0386542
287.324	308.918	-0.0389035
287.449	309.53	-0.0389569
300.407	313.877	-0.0412671
300.289	313.436	-0.0412687
300.838	313.378	-0.0413258
301.011	313.948	-0.0413176
295.907	313.876	-0.0408403
295.789	313.436	-0.0408353
296.324	313.418	-0.0409267
296.449	314.03	-0.040918
291.407	313.876	-0.0399814
291.289	313.436	-0.0399648
291.824	313.418	-0.0401223
291.949	314.03	-0.0401237
286.907	313.876	-0.0384229
286.789	313.436	-0.0383889
287.324	313.418	-0.0386424
287.449	314.03	-0.0386605
282.408	322.876	-0.033974
282.289	322.438	-0.034051
282.824	322.418	-0.0343993
282.947	323.035	-0.0342552
300.407	327.377	-0.0377456
300.289	326.936	-0.0379372
300.838	326.878	-0.0380244
301.013	327.444	-0.0377748
295.907	327.376	-0.037198
295.789	326.936	-0.0373836
296.324	326.918	-0.0374959
296.455	327.533	-0.0372211
291.407	327.376	-0.0361505
291.289	326.936	-0.0363265
291.824	326.918	-0.036513
291.961	327.538	-0.0362461
286.907	327.376	-0.0343538
286.789	326.936	-0.0345174
287.324	326.918	-0.0348025
287.456	327.533	-0.0345471
282.503	303.191	-0.0363741
282.774	302.723	-0.0365398
283.21	303.128	-0.0368164
282.758	303.709	-0.0365604
300.503	308.473	-0.0414551
300.728	307.947	-0.0414827
301.296	308.242	-0.0415281
296.003	308.473	-0.04107
296.228	307.947	-0.0411172
296.768	308.337	-0.0411926
291.503	308.473	-0.0402568
291.728	307.947	-0.040334
292.268	308.337	-0.0404724
287.003	308.473	-0.038748
287.228	307.947	-0.0388668
287.768	308.337	-0.0391014
282.503	307.691	-0.036451
282.803	307.214	-0.0366721
283.231	307.609	-0.0369083
282.761	308.212	-0.036598
300.503	312.973	-0.0413014
300.728	312.447	-0.0413563
301.296	312.742	-0.0413923
296.003	312.973	-0.0408848
296.228	312.447	-0.0409577
296.768	312.837	-0.041019
291.503	312.973	-0.0400444
291.728	312.447	-0.0401487
292.268	312.837	-0.0402713
287.003	312.973	-0.0385102
287.228	312.447	-0.0386588
287.768	312.837	-0.0388752
282.503	312.191	-0.0362397
282.789	311.707	-0.0364802
283.229	312.108	-0.0367023
282.761	312.712	-0.0363567
282.503	294.191	-0.034599
282.774	293.722	-0.0346342
283.21	294.128	-0.0350599
282.758	294.709	-0.0349509
282.503	321.973	-0.0343355
282.728	321.447	-0.0346626
283.262	321.842	-0.0348715
300.503	326.473	-0.0381664
300.728	325.947	-0.0384343
301.296	326.242	-0.0383597
296.003	326.473	-0.0376357
296.228	325.947	-0.0379277
296.768	326.337	-0.0378453
291.503	326.473	-0.0366158
291.728	325.947	-0.0369472
292.268	326.337	-0.0369304
287.003	326.473	-0.0348552
287.228	325.947	-0.0352392
287.768	326.337	-0.0353141
282.503	325.691	-0.0327003
282.808	325.223	-0.0331652
283.232	325.61	-0.0332332
282.761	326.212	-0.0326029
289.031	330.172	-0.0336666
288.744	330.689	-0.0332548
288.343	330.051	-0.03347
288.795	329.688	-0.0338814
295.372	302.535	-0.040927
295.341	301.966	-0.0409269
296.004	302.161	-0.0410316
295.911	302.815	-0.0410213
290.872	302.535	-0.0400362
290.841	301.966	-0.0400297
291.504	302.161	-0.0402252
291.411	302.815	-0.0402038
286.372	302.535	-0.0383932
286.329	301.965	-0.0383677
287	302.153	-0.0386926
286.911	302.815	-0.0386625
295.372	298.035	-0.0405005
295.341	297.466	-0.0404382
296.004	297.661	-0.0405658
295.906	298.32	-0.040623
290.872	298.035	-0.039574
290.841	297.466	-0.0394999
291.504	297.661	-0.0397268
291.406	298.32	-0.0397765
286.372	298.035	-0.037854
286.341	297.466	-0.0377597
287.004	297.661	-0.0381202
286.906	298.32	-0.038165
282.505	299.522	-0.0359664
282.728	298.947	-0.0360147
283.293	299.349	-0.0364468
282.919	299.983	-0.0363261
295.372	293.535	-0.0394774
295.341	292.966	-0.0393181
296.004	293.161	-0.0394847
295.906	293.82	-0.039649
290.872	293.535	-0.0384759
290.841	292.966	-0.0382997
291.504	293.161	-0.038575
291.406	293.82	-0.0387362
286.372	293.535	-0.0366336
286.329	292.965	-0.0364259
286.999	293.154	-0.0368437
286.906	293.82	-0.0370092
295.372	320.535	-0.0397066
295.341	319.966	-0.0398745
296.004	320.161	-0.0399404
295.911	320.815	-0.0397322
290.872	320.535	-0.0386991
290.841	319.966	-0.0388716
291.504	320.161	-0.0390223
291.411	320.815	-0.038792
286.372	320.535	-0.0369484
286.33	319.965	-0.0371199
287	320.153	-0.0373943
286.911	320.815	-0.0371336
300.49	317.526	-0.0408467
300.7	316.942	-0.0409519
301.296	317.242	-0.0409681
300.85	317.974	-0.0408348
295.997	317.515	-0.0404065
296.228	316.947	-0.0405321
296.779	317.323	-0.040571
296.373	317.95	-0.0404251
291.497	317.515	-0.0395216
291.728	316.947	-0.0396824
292.279	317.323	-0.0397842
291.873	317.95	-0.0395821
286.997	317.515	-0.0379353
287.228	316.947	-0.0381454
287.779	317.323	-0.0383411
287.373	317.95	-0.0380573
282.505	317.522	-0.03555
282.728	316.947	-0.0357987
283.293	317.349	-0.0360824
282.919	317.983	-0.0357425
299.844	289.059	-0.0381078
299.819	288.482	-0.0378478
300.502	288.675	-0.0379788
300.405	289.323	-0.0382642
295.372	289.035	-0.0376414
295.341	288.466	-0.0373713
296.003	288.661	-0.0375846
295.906	289.32	-0.0378735
290.845	289.057	-0.0365357
290.819	288.48	-0.0362437
291.506	288.667	-0.0365781
291.406	289.321	-0.0368627
286.372	289.035	-0.0345403
286.33	288.465	-0.0342165
286.999	288.654	-0.0346925
286.906	289.32	-0.0349884
282.505	290.522	-0.0329455
282.728	289.947	-0.0327989
283.287	290.354	-0.0334127
282.919	290.983	-0.0334984
308.625	302.227	-0.0412461
308.395	301.883	-0.041244
309.03	301.691	-0.0411956
309.232	302.305	-0.0412319
313.125	302.227	-0.040796
312.895	301.883	-0.0408078
313.53	301.691	-0.0406993
313.732	302.305	-0.0407272
317.625	302.227	-0.0398214
317.395	301.883	-0.0398606
318.03	301.691	-0.0396566
318.232	302.305	-0.0396628
322.125	302.227	-0.0380795
321.895	301.883	-0.0381555
322.53	301.691	-0.0378309
322.73	302.306	-0.0378101
300.352	304.52	-0.0414292
300.849	304.184	-0.0414523
300.882	304.877	-0.0414921
300.275	304.99	-0.041459
295.828	304.522	-0.0410643
296.328	304.215	-0.0411305
296.349	304.913	-0.0411657
295.753	305	-0.0410854
296.539	302.593	-0.0411165
296.36	303.185	-0.0411033
291.328	304.522	-0.0402383
291.828	304.215	-0.0403681
291.849	304.913	-0.0404059
291.253	305	-0.0402499
292.039	302.593	-0.0403795
291.86	303.185	-0.0403445
286.828	304.522	-0.0386949
287.328	304.215	-0.0389138
287.349	304.913	-0.0389589
286.753	305	-0.0386954
287.539	302.593	-0.0389514
287.36	303.185	-0.038889
282.104	304.75	-0.0362325
282.588	304.683	-0.0365299
282.471	305.296	-0.0364908
281.834	305.335	-0.0361147
283.414	303.851	-0.0369706
300.734	307.396	-0.0415027
301.318	307.669	-0.0415378
296.256	307.337	-0.0411474
296.806	307.588	-0.0412138
291.756	307.337	-0.0403703
292.306	307.588	-0.040501
287.256	307.337	-0.0389098
287.806	307.588	-0.0391379
283.415	308.353	-0.0369957
308.625	297.727	-0.0406481
308.395	297.383	-0.0406172
309.03	297.191	-0.0405385
309.232	297.805	-0.040629
313.125	297.727	-0.0401171
312.895	297.383	-0.0400996
313.53	297.191	-0.039961
313.732	297.805	-0.0400442
317.625	297.727	-0.0390645
317.395	297.383	-0.0390722
318.03	297.191	-0.0388362
318.232	297.805	-0.0389024
322.125	297.727	-0.0372448
321.895	297.383	-0.0372851
322.53	297.191	-0.0369267
322.721	297.811	-0.0369787
296.539	298.093	-0.0406961
296.353	298.698	-0.0407409
292.039	298.093	-0.0399356
291.853	298.698	-0.0399602
287.539	298.093	-0.038441
287.353	298.698	-0.038442
282.764	298.325	-0.0359448
283.31	298.579	-0.0363292
300.734	311.896	-0.0414022
301.318	312.169	-0.0414301
296.256	311.837	-0.041015
296.806	312.087	-0.0410743
291.756	311.837	-0.040214
292.306	312.087	-0.0403358
287.256	311.837	-0.0387344
287.806	312.087	-0.0389519
283.415	312.852	-0.0367477
308.625	293.227	-0.0395164
308.395	292.883	-0.0394353
309.03	292.691	-0.0393166
309.232	293.305	-0.0394976
313.125	293.227	-0.038905
312.895	292.883	-0.0388387
313.53	292.691	-0.0386567
313.732	293.305	-0.0388292
317.625	293.227	-0.0377482
317.395	292.883	-0.0377068
318.03	292.691	-0.0374228
318.232	293.305	-0.0375803
322.125	293.227	-0.0358027
321.895	292.883	-0.035792
322.53	292.691	-0.0353815
322.73	293.306	-0.035524
296.539	293.593	-0.0396896
296.353	294.198	-0.0398275
292.039	293.593	-0.0388683
291.853	294.198	-0.0389888
287.539	293.593	-0.0372623
287.353	294.198	-0.0373627
282.107	295.747	-0.0348837
282.59	295.682	-0.0351861
282.483	296.299	-0.0353121
281.826	296.313	-0.0348986
283.413	294.851	-0.0354351
308.625	320.227	-0.0404758
308.395	319.883	-0.040581
309.03	319.691	-0.0406053
309.232	320.305	-0.0404468
313.125	320.227	-0.040061
312.895	319.883	-0.0401926
313.53	319.691	-0.0401517
313.732	320.305	-0.0399655
317.625	320.227	-0.0390468
317.395	319.883	-0.0392199
318.03	319.691	-0.0390791
318.232	320.305	-0.0388496
322.125	320.227	-0.0371995
321.895	319.883	-0.0374233
322.53	319.691	-0.0371607
322.73	320.306	-0.0368817
300.352	322.52	-0.0397289
300.849	322.184	-0.0398774
300.882	322.877	-0.0396798
300.275	322.99	-0.039591
295.828	322.522	-0.0392266
296.328	322.215	-0.039411
296.349	322.913	-0.0392054
295.753	323	-0.0390755
296.539	320.593	-0.039913
296.36	321.185	-0.0397151
291.328	322.522	-0.0382491
291.828	322.215	-0.0385035
291.849	322.913	-0.0382901
291.253	323	-0.0380804
292.039	320.593	-0.0390556
291.86	321.185	-0.0388269
286.828	322.522	-0.0365418
287.328	322.215	-0.0368938
287.349	322.913	-0.03667
286.753	323	-0.0363495
287.539	320.593	-0.0375155
287.36	321.185	-0.0372433
282.752	320.859	-0.0348897
283.282	321.111	-0.0351351
300.734	325.396	-0.0386938
301.318	325.669	-0.0386254
296.256	325.337	-0.0382249
296.806	325.588	-0.0382033
291.756	325.337	-0.0372585
292.306	325.588	-0.0373045
287.256	325.337	-0.0355695
287.806	325.588	-0.0357108
283.416	326.353	-0.0329625
281.829	324	-0.033148
281.437	324.711	-0.0325462
281.054	324.167	-0.0325949
281.346	323.612	-0.0330282
282.091	324.649	-0.0329964
300.746	316.388	-0.0410445
301.318	316.669	-0.0410517
296.256	316.34	-0.0406353
296.807	316.587	-0.0406815
291.756	316.34	-0.039796
292.307	316.587	-0.0399054
287.256	316.34	-0.0382727
287.807	316.587	-0.0384768
282.756	316.329	-0.0359431
283.308	316.581	-0.0362318
288.021	330.661	-0.0329634
308.625	288.727	-0.0376354
308.396	288.368	-0.0374881
309.027	288.193	-0.0373361
309.229	288.812	-0.0376235
313.125	288.727	-0.0369472
312.9	288.368	-0.0368161
313.535	288.192	-0.0365936
313.731	288.81	-0.0368715
317.625	288.727	-0.0356719
317.399	288.368	-0.0355663
318.028	288.193	-0.0352392
318.228	288.811	-0.0355011
322.125	288.727	-0.0335796
321.9	288.368	-0.0335031
322.528	288.193	-0.0330505
322.726	288.811	-0.0332982
301.039	289.093	-0.0381978
300.849	289.702	-0.038461
296.539	289.093	-0.0378784
296.353	289.698	-0.0381276
292.039	289.093	-0.0369644
291.853	289.698	-0.0371975
287.539	289.093	-0.0352153
287.353	289.698	-0.0354301
282.754	289.35	-0.0325062
283.29	289.607	-0.0330143
324.361	285.354	-0.0301456
324.137	285.933	-0.0306531
323.474	285.597	-0.0308548
324.026	284.9	-0.0300931
301.085	284.45	-0.0357767
300.356	284.679	-0.0358503
299.622	284.373	-0.0356528
289.958	284.373	-0.033554
289.202	284.667	-0.0334032
288.46	284.449	-0.0329524
280.054	328.843	-0.0294817
280.283	329.578	-0.0291512
280.016	330.291	-0.0285618
280.046	301.856	-0.0349154
280.28	302.593	-0.0350934
279.984	303.323	-0.0349788
323.859	296.698	-0.0360932
324.454	296.801	-0.0357842
324.14	297.22	-0.0360837
323.645	297.178	-0.0363506
306.183	305.741	-0.0416082
305.756	305.992	-0.0416261
305.638	305.525	-0.0416016
306.134	305.151	-0.0415741
310.705	305.667	-0.0414038
310.307	305.869	-0.0414533
310.178	305.408	-0.0414268
310.673	305.091	-0.0413624
315.205	305.667	-0.0407855
314.807	305.869	-0.0408829
314.678	305.408	-0.0408664
315.173	305.091	-0.0407421
319.705	305.667	-0.0395072
319.307	305.869	-0.0396745
319.178	305.408	-0.0396779
319.673	305.091	-0.0394664
306.183	310.241	-0.0416488
305.756	310.493	-0.0416483
305.637	310.025	-0.0416474
306.134	309.652	-0.0416461
310.705	310.167	-0.0414909
310.307	310.369	-0.0415246
310.178	309.908	-0.041526
310.673	309.591	-0.0414858
315.205	310.167	-0.0408967
314.807	310.369	-0.0409782
314.678	309.908	-0.0409943
315.173	309.591	-0.0408947
319.705	310.167	-0.0396214
319.307	310.369	-0.0397732
319.178	309.908	-0.0398136
319.673	309.591	-0.0396269
324.191	310.201	-0.0375029
323.79	310.39	-0.0377284
323.68	309.969	-0.0377844
324.127	309.66	-0.0375351
306.183	314.741	-0.0414211
305.756	314.993	-0.0414023
305.637	314.525	-0.0414332
306.134	314.152	-0.0414581
310.705	314.667	-0.0412686
310.307	314.869	-0.041287
310.178	314.408	-0.041324
310.673	314.091	-0.0413074
315.205	314.667	-0.0406612
314.807	314.869	-0.0407271
314.678	314.408	-0.0407827
315.173	314.091	-0.0407076
319.705	314.667	-0.0393582
319.307	314.869	-0.0394943
319.178	314.408	-0.0395777
319.673	314.091	-0.0394159
324.193	314.702	-0.0371998
323.79	314.89	-0.0374105
323.681	314.469	-0.0375079
324.128	314.161	-0.0372836
306.183	323.741	-0.0395765
305.756	323.992	-0.0394896
305.638	323.525	-0.0396477
306.134	323.151	-0.0397695
310.705	323.667	-0.0394044
310.307	323.869	-0.0393737
310.178	323.408	-0.0395364
310.673	323.091	-0.0395951
315.205	323.667	-0.0386954
314.807	323.869	-0.0387157
314.678	323.408	-0.0389028
315.173	323.091	-0.0388995
319.705	323.667	-0.0372431
319.307	323.869	-0.0373343
319.178	323.408	-0.0375564
319.673	323.091	-0.0374666
306.177	328.243	-0.0375697
305.749	328.487	-0.0374444
305.639	328.019	-0.0376811
306.135	327.647	-0.0378686
310.703	328.162	-0.0373899
310.311	328.362	-0.0373303
310.179	327.906	-0.0375721
310.659	327.607	-0.0376739
319.704	328.161	-0.0350448
319.311	328.362	-0.0351101
319.179	327.906	-0.0354152
319.659	327.607	-0.0353679
284.409	301.495	-0.0373808
283.774	302.011	-0.037081
283.64	301.358	-0.0369519
283.996	300.884	-0.0370977
283.253	302.426	-0.036811
283.133	301.784	-0.0366972
283.817	302.705	-0.0371449
296.782	306.894	-0.0412317
296.66	306.254	-0.041231
297.411	306.326	-0.0413032
297.389	307.143	-0.0412837
292.282	306.894	-0.0405189
292.16	306.254	-0.0405061
292.911	306.326	-0.0406629
292.889	307.143	-0.0406376
287.782	306.894	-0.0391521
287.66	306.254	-0.0391174
288.411	306.326	-0.0394044
288.389	307.143	-0.0393756
283.299	306.878	-0.0369753
283.17	306.217	-0.0369169
283.861	306.351	-0.0372991
283.864	307.156	-0.0372815
283.278	297.882	-0.0361869
283.161	297.239	-0.0359844
283.86	297.354	-0.0364249
283.865	298.15	-0.0365833
296.783	311.394	-0.041122
296.671	310.76	-0.0411486
297.412	310.826	-0.041222
297.389	311.643	-0.0411675
292.283	311.394	-0.0403857
292.171	310.76	-0.0404035
292.912	310.826	-0.0405578
292.889	311.643	-0.0404956
287.783	311.394	-0.0390022
287.671	310.76	-0.0390041
288.412	310.826	-0.0392854
288.389	311.643	-0.0392148
283.29	311.377	-0.0368062
283.141	310.738	-0.036772
283.859	310.851	-0.0371655
283.863	311.656	-0.0371029
284.409	292.495	-0.0351734
283.774	293.011	-0.0350058
283.64	292.358	-0.034651
283.995	291.884	-0.0346562
283.254	293.426	-0.0348392
283.133	292.783	-0.0345087
283.817	293.704	-0.0352929
284.409	319.495	-0.0362688
283.771	320.017	-0.0357721
283.638	319.362	-0.0358784
283.995	318.885	-0.0361969
283.237	320.449	-0.0353263
283.128	319.796	-0.0354588
283.823	320.703	-0.0355892
296.782	324.894	-0.0385158
296.66	324.254	-0.038772
297.411	324.326	-0.0388413
297.389	325.143	-0.0384844
292.282	324.894	-0.0376247
292.16	324.254	-0.0378754
292.911	324.326	-0.0380349
292.889	325.143	-0.0376636
287.782	324.894	-0.0360413
287.66	324.254	-0.0362833
288.411	324.326	-0.0365752
288.389	325.143	-0.0361836
283.287	324.875	-0.0336464
283.168	324.244	-0.0338792
283.913	324.323	-0.0342897
283.89	325.114	-0.0338911
296.782	315.899	-0.0407771
296.671	315.26	-0.0408446
297.412	315.326	-0.040919
297.388	316.149	-0.0408095
292.282	315.899	-0.0400051
292.171	315.26	-0.0400657
292.912	315.326	-0.040222
292.888	316.149	-0.0401026
287.782	315.899	-0.0385805
287.671	315.26	-0.0386286
288.412	315.326	-0.0389119
288.388	316.149	-0.0387795
283.266	315.887	-0.0363312
283.139	315.249	-0.0363595
283.859	315.355	-0.0367523
283.866	316.153	-0.0366279
284.382	288.017	-0.0328075
283.772	288.509	-0.032717
283.638	287.837	-0.0322273
284.001	287.345	-0.0321553
283.249	288.934	-0.0326164
283.149	288.278	-0.0321679
283.827	289.196	-0.0331438
324.572	306.748	-0.0372373
324.348	306.268	-0.0373602
324.84	306.146	-0.0370671
325.14	306.655	-0.0369022
324.615	324.799	-0.0341316
324.391	324.278	-0.0345306
324.897	324.133	-0.0342752
325.163	324.649	-0.0338538
314.193	329.007	-0.0363526
314.644	328.774	-0.0364015
314.785	329.188	-0.0361218
314.306	329.535	-0.0360168
323.181	328.989	-0.0327257
323.625	328.779	-0.0326051
323.765	329.2	-0.0322527
323.289	329.536	-0.0323186
311.306	287.33	-0.0365676
310.834	287.553	-0.0367835
310.71	287.097	-0.0365419
311.241	286.721	-0.0362286
315.81	287.35	-0.0355372
315.355	287.568	-0.0358133
315.209	287.081	-0.0355671
315.74	286.755	-0.035203
320.409	287.33	-0.0336774
319.869	287.575	-0.0341077
319.715	287.038	-0.033848
320.266	286.78	-0.0334058
303.06	302.016	-0.0413862
302.416	302.265	-0.0414145
302.439	301.586	-0.0413787
302.998	301.241	-0.0413367
300.727	302.337	-0.0413813
301.407	302.14	-0.0414085
301.334	302.866	-0.0414289
300.749	303.101	-0.0414027
307.273	306.545	-0.0415786
307.338	305.757	-0.0415588
307.968	306.031	-0.0415383
307.95	306.68	-0.0415462
311.767	306.533	-0.0413063
311.837	305.751	-0.0412718
312.467	306.03	-0.0412022
312.45	306.68	-0.0412185
316.267	306.533	-0.0405628
316.337	305.751	-0.040513
316.967	306.03	-0.0403604
316.95	306.68	-0.0403832
320.767	306.533	-0.0390963
320.836	305.75	-0.0390319
321.467	306.03	-0.0387635
321.45	306.68	-0.0387908
303.06	297.516	-0.0408599
302.416	297.765	-0.0409204
302.439	297.086	-0.0408155
302.998	296.741	-0.0407296
300.727	297.841	-0.0409142
301.407	297.643	-0.040914
301.333	298.378	-0.0410059
300.751	298.615	-0.0410081
307.273	311.045	-0.0415847
307.338	310.257	-0.0416108
307.968	310.531	-0.0415804
307.95	311.18	-0.0415497
311.767	311.033	-0.041343
311.837	310.251	-0.0413613
312.467	310.53	-0.0412765
312.45	311.18	-0.0412479
316.267	311.033	-0.0406116
316.337	310.251	-0.0406209
316.967	310.53	-0.0404479
316.95	311.18	-0.0404206
320.767	311.033	-0.0391365
320.837	310.251	-0.0391362
321.467	310.53	-0.0388424
321.45	311.18	-0.0388155
303.06	293.016	-0.0397621
302.416	293.265	-0.039865
302.439	292.586	-0.0396517
302.998	292.241	-0.0395057
300.727	293.341	-0.0398788
301.407	293.143	-0.0398443
301.333	293.878	-0.0400489
300.751	294.115	-0.040089
303.06	320.016	-0.0405478
302.416	320.265	-0.0404834
302.439	319.59	-0.0406453
302.997	319.244	-0.0407206
300.727	320.337	-0.0403767
301.407	320.14	-0.0404829
301.334	320.866	-0.0402857
300.749	321.101	-0.0401698
307.273	324.545	-0.039227
307.338	323.757	-0.0395311
307.968	324.031	-0.0394016
307.95	324.68	-0.0391368
311.767	324.533	-0.0389233
311.837	323.751	-0.0392247
312.467	324.03	-0.039025
312.45	324.68	-0.0387544
316.267	324.533	-0.0380451
316.337	323.751	-0.0383504
316.967	324.03	-0.0380481
316.95	324.68	-0.0377674
320.767	324.533	-0.0363648
320.836	323.75	-0.0366757
321.467	324.03	-0.0362412
321.45	324.68	-0.0359481
307.273	315.545	-0.0412989
307.338	314.757	-0.0413835
307.968	315.031	-0.0413329
307.95	315.68	-0.0412522
311.767	315.533	-0.0410479
311.837	314.751	-0.0411305
312.467	315.03	-0.0410211
312.45	315.68	-0.0409372
316.267	315.533	-0.0402934
316.337	314.751	-0.0403726
316.967	315.03	-0.0401709
316.95	315.68	-0.0400837
320.767	315.533	-0.0387823
320.837	314.751	-0.0388565
321.467	315.03	-0.038531
321.45	315.68	-0.0384403
307.255	329.079	-0.0370702
307.334	328.269	-0.0375169
307.965	328.542	-0.0373398
307.949	329.2	-0.0369657
311.758	328.996	-0.0367674
311.835	328.242	-0.0371812
312.461	328.529	-0.0369188
312.45	329.18	-0.0365402
316.248	329.085	-0.0357539
316.33	328.278	-0.036201
316.964	328.544	-0.0358419
316.947	329.198	-0.0354524
320.762	328.999	-0.0340144
320.836	328.242	-0.0344364
321.462	328.529	-0.0339363
321.45	329.18	-0.033535
293.214	329.747	-0.035331
293.03	330.202	-0.0350234
292.624	329.898	-0.0350981
292.788	329.319	-0.0354828
284.18	329.788	-0.0314437
284.022	330.218	-0.0310902
283.62	329.897	-0.0310453
283.78	329.322	-0.0314983
303.06	288.517	-0.037889
302.391	288.776	-0.0380425
302.462	288.088	-0.0377048
302.991	287.745	-0.0375015
308.491	304.882	-0.0414285
308.812	304.493	-0.0413896
309.228	304.82	-0.0414044
308.703	305.541	-0.0414821
307.846	304.769	-0.0414437
307.949	305.352	-0.0414989
307.318	305.115	-0.0415165
312.991	304.882	-0.0410315
313.312	304.493	-0.0409577
313.728	304.82	-0.0409375
313.203	305.541	-0.0410744
312.346	304.769	-0.0411009
312.449	305.351	-0.041156
311.819	305.114	-0.0412225
317.491	304.882	-0.0401064
317.812	304.493	-0.0399816
318.228	304.82	-0.0399014
317.703	305.541	-0.040123
316.846	304.769	-0.0402646
316.949	305.351	-0.0403112
316.319	305.114	-0.0404601
321.991	304.882	-0.0384114
322.312	304.493	-0.0382261
322.694	304.793	-0.0380814
322.192	305.535	-0.0383924
321.346	304.769	-0.0386871
321.447	305.35	-0.0387174
320.819	305.114	-0.0389798
299.825	304.761	-0.0413966
299.832	305.336	-0.0414418
295.301	304.746	-0.0409867
295.332	305.336	-0.0410334
290.801	304.746	-0.0400912
290.832	305.336	-0.0401422
286.301	304.746	-0.0384535
286.332	305.336	-0.0385119
282.376	304.213	-0.0363527
282.951	304.298	-0.0367231
308.491	309.382	-0.0415436
308.812	308.993	-0.0415309
309.228	309.32	-0.0415308
308.703	310.041	-0.0415602
307.846	309.269	-0.0415581
307.949	309.852	-0.0415808
307.318	309.615	-0.0416049
312.991	309.382	-0.0411872
313.312	308.993	-0.0411416
313.728	309.32	-0.0411019
313.203	310.041	-0.0411861
312.346	309.269	-0.0412595
312.449	309.851	-0.0412763
311.819	309.614	-0.041354
317.491	309.382	-0.0402827
317.812	308.993	-0.0401879
318.228	309.32	-0.0400834
317.703	310.041	-0.0402487
316.846	309.269	-0.0404477
316.949	309.851	-0.0404506
316.319	309.614	-0.0406155
321.991	309.382	-0.0385841
322.312	308.993	-0.0384295
322.728	309.32	-0.0382428
322.203	310.041	-0.0385042
321.346	309.269	-0.0388714
321.449	309.851	-0.038852
320.819	309.614	-0.0391367
325.776	309.36	-0.036544
326.306	309.714	-0.0362589
325.792	310.094	-0.0365616
325.277	309.701	-0.0368598
299.82	309.207	-0.0414014
299.872	309.748	-0.0414235
295.32	309.207	-0.0409622
295.363	309.756	-0.0409837
290.82	309.207	-0.0400589
290.863	309.756	-0.0400836
286.32	309.207	-0.0384254
286.363	309.756	-0.0384549
281.701	309.377	-0.0359561
282.11	309.588	-0.0362106
281.759	310.115	-0.0359887
281.215	309.7	-0.0356806
282.356	308.716	-0.0363422
282.93	308.818	-0.0367035
282.498	309.27	-0.0364434
282.11	309.133	-0.0362064
325.8	300.374	-0.0357764
326.347	300.835	-0.0355752
325.85	301.126	-0.0359232
325.282	300.697	-0.0361671
303.33	300.249	-0.0411943
303.839	300.386	-0.0412123
303.507	300.852	-0.0412818
302.848	300.575	-0.0412637
281.734	300.388	-0.0356502
282.198	300.65	-0.0359966
281.869	301.152	-0.0358683
281.224	300.767	-0.0354211
308.491	313.882	-0.0413796
308.812	313.493	-0.0413938
309.228	313.82	-0.0413719
308.703	314.541	-0.0413492
307.846	313.769	-0.0414006
307.949	314.352	-0.041383
307.318	314.115	-0.0414225
312.991	313.882	-0.0410233
313.312	313.493	-0.0410068
313.728	313.82	-0.0409413
313.203	314.541	-0.0409689
312.346	313.769	-0.0411051
312.449	314.351	-0.0410762
311.819	314.114	-0.0411733
317.491	313.882	-0.0401039
317.812	313.493	-0.04004
318.228	313.82	-0.0399058
317.703	314.541	-0.0400111
316.846	313.769	-0.0402815
316.949	314.351	-0.040234
316.319	314.114	-0.0404222
321.991	313.882	-0.0383761
322.312	313.493	-0.0382535
322.728	313.82	-0.0380345
322.203	314.541	-0.0382334
321.346	313.769	-0.0386783
321.449	314.351	-0.038605
320.819	314.114	-0.0389159
325.786	313.871	-0.0363043
326.352	314.239	-0.0359617
325.809	314.618	-0.0362463
325.271	314.209	-0.0366008
299.82	313.707	-0.0412059
299.872	314.248	-0.0411989
295.32	313.707	-0.040737
295.363	314.256	-0.0407297
290.82	313.707	-0.0398041
290.863	314.256	-0.0397979
286.32	313.707	-0.0381415
286.363	314.256	-0.0381371
281.701	313.878	-0.0356385
282.109	314.09	-0.0358787
281.754	314.626	-0.0356143
281.193	314.243	-0.0353229
282.356	313.216	-0.0360694
282.93	313.318	-0.0364258
282.498	313.771	-0.0361351
282.11	313.633	-0.0359061
303.33	295.749	-0.0404684
303.839	295.886	-0.0404969
303.507	296.352	-0.0406249
302.848	296.075	-0.0405827
282.376	295.212	-0.0348669
282.949	295.3	-0.0352895
308.491	322.882	-0.0397503
308.812	322.493	-0.0398554
309.228	322.82	-0.0397495
308.703	323.541	-0.039546
307.846	322.769	-0.0398047
307.949	323.352	-0.0396362
307.318	323.115	-0.0397402
312.991	322.882	-0.0393273
313.312	322.493	-0.0394003
313.728	322.82	-0.0392434
313.203	323.541	-0.0390923
312.346	322.769	-0.0394509
312.449	323.351	-0.0392674
311.819	323.114	-0.0394382
317.491	322.882	-0.0382891
317.812	322.493	-0.0383163
318.228	322.82	-0.0380827
317.703	323.541	-0.0380055
316.846	322.769	-0.0385164
316.949	323.351	-0.0383064
316.319	323.114	-0.0385778
321.991	322.882	-0.0364097
322.312	322.493	-0.0363838
322.694	322.793	-0.0360856
322.192	323.535	-0.0360726
321.346	322.769	-0.0367661
321.447	323.35	-0.0365221
320.819	323.114	-0.036922
299.825	322.761	-0.0396009
299.832	323.336	-0.0394361
295.301	322.746	-0.0390567
295.332	323.336	-0.0388865
290.801	322.746	-0.0380039
290.832	323.336	-0.0378279
286.301	322.746	-0.036196
286.332	323.336	-0.036012
281.824	322.719	-0.0336563
281.859	323.289	-0.0334727
308.491	327.382	-0.0378984
308.812	326.993	-0.038071
309.228	327.319	-0.0379021
308.703	328.041	-0.0375717
307.846	327.269	-0.0379764
307.948	327.855	-0.0376981
307.318	327.616	-0.0378459
312.991	327.382	-0.0374215
313.312	326.993	-0.0375597
313.72	327.333	-0.0373282
313.193	328.058	-0.0370514
312.346	327.269	-0.0375775
312.449	327.854	-0.0372807
311.819	327.613	-0.0375062
317.491	327.382	-0.0362907
317.812	326.993	-0.0363825
318.228	327.319	-0.0360765
317.703	328.041	-0.0358768
316.846	327.269	-0.0365542
316.949	327.857	-0.0362276
316.318	327.621	-0.0365549
321.991	327.382	-0.0342991
322.312	326.993	-0.0343361
322.723	327.332	-0.0339352
322.194	328.058	-0.0338211
321.346	327.269	-0.0346935
321.45	327.854	-0.0343329
320.819	327.613	-0.0347951
325.785	327.389	-0.032006
326.335	327.836	-0.0314224
325.794	328.145	-0.0315895
325.257	327.723	-0.0321739
299.82	327.207	-0.0377534
299.872	327.748	-0.0375046
295.32	327.207	-0.0371562
295.363	327.756	-0.0369003
290.82	327.207	-0.0360272
290.863	327.756	-0.0357681
286.32	327.207	-0.0341266
286.363	327.756	-0.0338634
281.692	327.371	-0.0313126
282.103	327.567	-0.0314786
281.761	328.129	-0.0309396
281.214	327.765	-0.0308048
282.355	326.715	-0.0320746
282.929	326.818	-0.0324084
282.493	327.264	-0.0318921
282.11	327.133	-0.0317113
325.783	318.353	-0.0355938
326.307	318.735	-0.0352198
325.794	319.09	-0.0354488
325.259	318.689	-0.035858
303.33	318.249	-0.0408683
303.839	318.386	-0.0408663
303.507	318.852	-0.0407938
302.848	318.575	-0.0408293
281.734	318.388	-0.0349273
282.199	318.648	-0.0351761
281.872	319.145	-0.0348635
281.244	318.742	-0.0345741
311.588	330.192	-0.0360864
311.119	330.743	-0.0358663
310.821	330.241	-0.0361982
311.292	329.657	-0.0364596
320.605	330.191	-0.0333381
320.211	330.697	-0.0332499
319.86	330.184	-0.0337426
320.317	329.677	-0.0338222
302.558	330.212	-0.0363302
302.243	330.725	-0.0360485
301.861	330.073	-0.0363994
302.366	329.691	-0.0366364
300.482	330.211	-0.036183
300.768	329.802	-0.0364667
301.132	330.22	-0.036267
300.827	330.734	-0.0359431
298.057	330.212	-0.0359256
297.717	330.757	-0.0355951
297.336	330.089	-0.0359309
297.797	329.706	-0.0362075
295.998	330.212	-0.0356145
296.252	329.818	-0.0359123
296.606	330.201	-0.0357571
296.308	330.738	-0.035391
293.588	330.187	-0.0351366
293.212	330.658	-0.0347951
286.975	330.199	-0.0326892
287.242	329.797	-0.033097
287.608	330.167	-0.0330572
287.327	330.683	-0.0325948
284.583	330.193	-0.031409
284.212	330.664	-0.0309242
325.783	291.353	-0.0327581
326.307	291.736	-0.0326484
325.794	292.09	-0.0331581
325.259	291.689	-0.0332901
303.33	291.249	-0.0390734
303.839	291.386	-0.039122
303.507	291.852	-0.0393321
302.848	291.575	-0.0392474
281.734	291.389	-0.0328906
282.199	291.648	-0.0333602
281.873	292.144	-0.0333885
281.245	291.742	-0.0327662
303.33	286.753	-0.0369164
303.848	286.898	-0.0369855
303.507	287.354	-0.0372616
302.85	287.084	-0.0371424
324.657	284.239	-0.0292888
324.931	284.854	-0.0294544
323.649	284.33	-0.0299994
301.975	284.406	-0.0357608
301.707	285.091	-0.0361055
300.951	285.163	-0.036128
297.707	284.415	-0.0355349
297.706	285.148	-0.0359041
296.92	285.083	-0.0357783
296.626	284.395	-0.0353838
288.622	285.14	-0.033413
287.85	285.09	-0.0330043
287.565	284.415	-0.0324725
280.016	327.96	-0.0299873
280.69	328.247	-0.0302152
280.741	329.016	-0.029776
280.018	300.96	-0.0347895
280.667	301.257	-0.0351869
280.737	302.022	-0.0353058
310.443	331.33	-0.0356532
309.859	332.084	-0.0353251
309.548	331.486	-0.0356448
309.883	331.031	-0.0358647
310.884	331.982	-0.035263
326.938	328.488	-0.0306788
327.688	329.058	-0.0298896
327.086	329.373	-0.0300354
326.638	329.046	-0.0305159
327.592	328.051	-0.0305541
326.941	301.502	-0.0353876
327.695	302.086	-0.0350838
327.097	302.397	-0.0354282
326.642	302.062	-0.0356337
327.593	301.061	-0.0349664
326.862	309.403	-0.035947
280.691	309.402	-0.0353921
326.907	300.496	-0.0351958
280.692	300.406	-0.0350554
326.878	313.877	-0.0357001
280.677	313.877	-0.0350669
326.907	327.491	-0.0312685
280.682	327.414	-0.0306771
326.83	318.388	-0.0349931
280.726	318.388	-0.0343487
311.449	331.297	-0.0355151
320.557	331.219	-0.0327646
302.547	331.254	-0.0357746
300.488	331.268	-0.0356199
298.141	331.303	-0.0353466
296.012	331.275	-0.0350374
293.496	331.208	-0.0345509
287.033	331.22	-0.0321258
284.495	331.212	-0.0307605
326.829	291.388	-0.0321456
280.726	291.388	-0.0322491
280.024	284.413	-0.0276315
327.549	284.396	-0.027517
297.029	305.806	-0.0412737
296.509	305.615	-0.0412114
297.007	305.21	-0.0412559
297.548	305.618	-0.0413135
292.529	305.806	-0.0405925
292.009	305.615	-0.0404701
292.507	305.21	-0.0405739
293.048	305.618	-0.0406902
288.029	305.806	-0.0392677
287.509	305.615	-0.0390538
288.007	305.21	-0.0392443
288.548	305.618	-0.0394538
283.53	305.806	-0.0371237
283.054	305.578	-0.0368464
283.546	305.235	-0.0371169
284.039	305.639	-0.0373952
305.571	306.44	-0.0416316
305.253	305.973	-0.0416153
297.033	310.308	-0.0412127
296.529	310.146	-0.0411564
297.019	309.771	-0.0412202
297.545	310.14	-0.0412622
292.533	310.308	-0.0405108
292.029	310.146	-0.0403986
292.519	309.771	-0.0405201
293.045	310.14	-0.0406158
288.033	310.308	-0.0391766
287.529	310.146	-0.0389776
288.019	309.771	-0.0391865
288.545	310.14	-0.0393691
283.515	310.317	-0.0370128
283.019	310.129	-0.0367357
283.529	309.76	-0.037039
284.032	310.145	-0.0373002
305.571	310.94	-0.0416277
305.253	310.473	-0.0416329
297.033	314.808	-0.0409385
296.529	314.646	-0.0408882
297.019	314.271	-0.0409762
297.545	314.64	-0.0410011
292.533	314.808	-0.0402044
292.029	314.646	-0.0400982
292.519	314.271	-0.0402453
293.045	314.64	-0.0403235
288.033	314.808	-0.0388351
287.529	314.646	-0.0386428
288.019	314.271	-0.0388792
288.545	314.64	-0.0390426
283.515	314.829	-0.0366358
283.019	314.633	-0.0363696
283.528	314.261	-0.0367023
284.032	314.646	-0.0369402
283.519	296.799	-0.0360989
283.024	296.592	-0.0357404
283.535	296.229	-0.0359519
284.032	296.627	-0.0363529
297.029	323.806	-0.0390027
296.509	323.615	-0.0389968
297.007	323.21	-0.0392083
297.548	323.618	-0.0391316
292.529	323.806	-0.0381582
292.009	323.615	-0.0380911
292.507	323.21	-0.0383701
293.048	323.618	-0.0383508
288.029	323.806	-0.0366416
287.509	323.615	-0.0364852
288.007	323.21	-0.0368621
288.548	323.618	-0.0369291
283.539	323.81	-0.0343041
283.021	323.613	-0.03407
283.532	323.23	-0.0345373
284.048	323.633	-0.0346757
305.571	324.44	-0.0393116
305.253	323.973	-0.0394808
314.668	328.023	-0.036804
315.134	327.678	-0.0368709
315.193	328.245	-0.0365579
314.789	328.453	-0.0365502
323.664	328.032	-0.0330169
324.116	327.707	-0.0329212
324.147	328.277	-0.0325803
323.769	328.467	-0.0327076
297.071	328.329	-0.0369048
296.554	328.171	-0.0369069
297.032	327.769	-0.0371929
297.563	328.1	-0.0370894
292.575	328.323	-0.0360035
292.06	328.172	-0.0359375
292.537	327.77	-0.0362909
293.068	328.1	-0.0362491
288.077	328.326	-0.0343977
287.557	328.17	-0.0342429
288.035	327.769	-0.0346918
288.569	328.1	-0.0347377
283.572	328.309	-0.0319904
283.048	328.144	-0.0317574
283.549	327.752	-0.0322957
284.068	328.095	-0.0324116
305.571	315.44	-0.0413496
305.253	314.973	-0.0413873
305.571	328.919	-0.0372021
305.252	328.468	-0.0374365
306.243	288.196	-0.0376188
306.239	287.651	-0.0373306
306.743	288.049	-0.0374952
305.797	288.039	-0.0375668
296.316	301.558	-0.0410517
296.479	300.894	-0.0410204
296.932	301.302	-0.0411034
296.752	301.982	-0.0411229
291.816	301.558	-0.0402838
291.979	300.894	-0.040271
292.432	301.302	-0.0404123
292.252	301.982	-0.0404113
287.316	301.558	-0.0388036
287.479	300.894	-0.0388121
287.932	301.302	-0.0390413
287.751	301.981	-0.0390152
296.316	297.058	-0.0405186
296.479	296.394	-0.040408
296.932	296.803	-0.0405413
296.752	297.483	-0.0406381
291.816	297.058	-0.0397166
291.979	296.394	-0.0396206
292.432	296.802	-0.0398208
292.252	297.482	-0.0399005
287.316	297.058	-0.0381567
287.479	296.394	-0.0380766
287.932	296.802	-0.0383732
287.752	297.482	-0.0384336
296.316	319.558	-0.0401414
296.516	318.827	-0.0403171
296.935	319.3	-0.0402823
296.752	319.982	-0.0401041
291.816	319.558	-0.0392709
292.016	318.827	-0.0394807
292.435	319.299	-0.0394895
292.252	319.982	-0.0392809
287.316	319.558	-0.0377094
287.516	318.827	-0.0379673
287.929	319.314	-0.0380365
287.751	319.98	-0.03779
296.316	292.558	-0.0393374
296.479	291.894	-0.0391114
296.932	292.303	-0.0393214
296.752	292.983	-0.0395331
291.816	292.558	-0.0384635
291.979	291.894	-0.0382489
292.432	292.302	-0.0385342
292.252	292.982	-0.0387322
287.316	292.558	-0.0367816
287.479	291.894	-0.0365795
287.932	292.302	-0.0369685
287.751	292.981	-0.0371501
300.818	288.083	-0.0377055
301.038	287.521	-0.0374172
301.426	287.968	-0.0376623
301.24	288.54	-0.0379434
296.315	288.057	-0.0373311
296.509	287.365	-0.0369853
296.938	287.828	-0.0372973
296.753	288.484	-0.0376126
291.836	288.052	-0.0363623
291.979	287.457	-0.0360718
292.44	287.831	-0.0364209
292.256	288.494	-0.0367247
287.315	288.058	-0.034526
287.508	287.366	-0.0342121
287.939	287.818	-0.0347029
287.752	288.483	-0.0349925
301.027	301.652	-0.0413716
301.519	301.608	-0.0413875
301.948	301.838	-0.0414019
301.896	302.553	-0.0414303
300.696	306.102	-0.0415191
301.116	305.508	-0.0415351
301.365	305.964	-0.0415589
301.33	306.514	-0.0415561
324.457	297.75	-0.0360266
323.799	297.666	-0.0363851
324.616	297.258	-0.0358182
301.027	297.152	-0.0408303
301.519	297.109	-0.0408366
301.948	297.338	-0.0408705
301.895	298.056	-0.0409704
283.2	300.451	-0.0365814
283.681	300.493	-0.0368732
283.515	300.865	-0.0368287
283.012	301.111	-0.0365576
300.71	310.587	-0.0414778
301.153	309.994	-0.0415279
301.38	310.453	-0.041532
301.331	311.013	-0.0415024
301.027	292.652	-0.0396833
301.519	292.609	-0.0396805
301.948	292.838	-0.0397499
301.895	293.556	-0.0399622
301.028	319.654	-0.0405739
301.519	319.609	-0.0406183
301.948	319.838	-0.0405812
301.896	320.553	-0.040398
300.696	324.102	-0.0392421
301.116	323.508	-0.0394977
301.365	323.964	-0.0393525
301.33	324.514	-0.03913
300.71	315.087	-0.0412076
301.153	314.494	-0.0412962
301.38	314.953	-0.0412733
301.331	315.513	-0.041207
283.2	318.451	-0.0358309
283.681	318.493	-0.0361085
283.515	318.865	-0.035932
283.012	319.113	-0.0355699
300.714	328.583	-0.0371517
301.161	327.977	-0.0375212
301.384	328.447	-0.0372914
301.336	329.003	-0.0369768
324.514	288.617	-0.0321054
323.839	288.674	-0.0325685
324.124	288.245	-0.0321455
324.484	287.986	-0.0317561
283.2	291.452	-0.0339386
283.681	291.493	-0.0342752
283.515	291.865	-0.0343503
283.012	292.111	-0.034134
324.839	305.531	-0.0370245
325.527	305.247	-0.0365909
325.355	306.003	-0.0367562
300.455	305.484	-0.0414938
295.955	305.484	-0.0411337
295.779	301.626	-0.0409841
291.455	305.484	-0.0403241
291.279	301.626	-0.0401453
286.955	305.484	-0.038808
286.775	301.626	-0.0385643
283.024	304.918	-0.0368038
300.513	309.908	-0.0414802
295.973	309.961	-0.0410804
291.473	309.961	-0.0402569
286.973	309.961	-0.0387376
282.46	309.935	-0.0364113
282.99	309.487	-0.0367344
305.032	300.894	-0.0412921
305.538	300.418	-0.0412309
305.681	301.042	-0.0413105
305.266	301.469	-0.0413575
300.769	301.121	-0.0413197
300.487	300.573	-0.0412414
301.095	300.533	-0.0412676
301.33	301.124	-0.0413412
300.292	301.124	-0.041295
295.779	297.126	-0.0404575
291.279	297.126	-0.0395794
286.779	297.126	-0.0379164
282.443	301.017	-0.0362039
282.465	301.593	-0.0362798
281.928	302.02	-0.0359872
300.513	314.408	-0.04125
295.973	314.461	-0.040819
291.473	314.461	-0.0399634
286.973	314.461	-0.0384107
282.459	314.437	-0.0360566
282.989	313.987	-0.0364136
282.479	310.582	-0.0363912
281.898	310.971	-0.0360138
305.032	296.394	-0.0406193
305.538	295.918	-0.0404968
305.681	296.542	-0.040644
305.266	296.969	-0.0407428
300.769	296.621	-0.0407221
300.487	296.073	-0.0405814
301.095	296.033	-0.0405987
301.33	296.624	-0.0407391
300.292	296.624	-0.0407012
295.779	292.626	-0.0392828
291.279	292.626	-0.0383269
286.774	292.626	-0.0365356
283.015	295.924	-0.0355383
324.87	323.505	-0.03456
325.527	323.195	-0.034264
325.387	323.983	-0.0340292
300.455	323.484	-0.0394485
295.955	323.484	-0.0389506
295.78	319.628	-0.0400407
291.455	323.484	-0.0379749
291.28	319.628	-0.039101
286.955	323.484	-0.0362708
286.776	319.626	-0.0374395
282.437	323.481	-0.033758
300.515	327.903	-0.0374962
295.973	327.962	-0.0369139
291.473	327.962	-0.0358662
286.973	327.962	-0.034069
282.458	327.938	-0.0314984
282.991	327.484	-0.0320932
305.032	318.894	-0.0408414
305.538	318.418	-0.0409317
305.681	319.042	-0.0408365
305.266	319.469	-0.0407461
300.771	319.127	-0.0406612
300.514	318.6	-0.0407221
301.113	318.573	-0.0407765
301.333	319.137	-0.0406996
300.296	319.117	-0.0406226
282.443	319.016	-0.0352487
282.465	319.596	-0.0351095
281.913	320.024	-0.0346395
282.478	315.089	-0.0359872
281.902	315.522	-0.0355707
282.483	328.594	-0.0311248
281.918	329.033	-0.0304855
305.032	291.894	-0.0393195
305.538	291.418	-0.0391118
305.681	292.042	-0.0393617
305.266	292.469	-0.039535
324.907	288.16	-0.0315834
325.161	288.628	-0.0316877
300.767	292.121	-0.039487
300.484	291.574	-0.0392529
301.094	291.534	-0.0392631
301.329	292.124	-0.0395033
300.292	292.124	-0.0394668
300.279	288.153	-0.0377175
295.782	288.132	-0.0372842
291.277	288.141	-0.0362275
286.776	288.127	-0.0342765
282.444	292.015	-0.0337121
282.466	292.594	-0.0339884
281.921	293.006	-0.0337984
305.031	287.367	-0.037232
305.529	286.854	-0.0369306
305.668	287.487	-0.0372776
305.244	287.94	-0.0375377
306.777	287.387	-0.0371361
306.165	287.074	-0.0370183
306.72	286.703	-0.0367581
302.279	287.398	-0.0373452
301.632	287.448	-0.0373891
301.816	287.001	-0.0371432
302.231	286.739	-0.0369819
298.137	305.404	-0.0413442
298.727	305.207	-0.0413642
298.7	305.858	-0.0413859
298.075	306.096	-0.0413517
293.637	305.404	-0.0407828
294.227	305.206	-0.0408607
294.199	305.858	-0.0408762
293.575	306.096	-0.0407811
289.137	305.404	-0.039643
289.727	305.206	-0.0398126
289.699	305.858	-0.0398237
289.075	306.096	-0.0396316
284.636	305.409	-0.0376967
285.226	305.207	-0.037977
285.195	305.861	-0.0379821
284.56	306.105	-0.0376677
302.614	306.638	-0.0415737
302.72	305.842	-0.0415717
303.166	306.206	-0.0415798
303.288	306.712	-0.0415728
298.14	309.907	-0.0413069
298.729	309.703	-0.04134
298.702	310.356	-0.0413339
298.076	310.596	-0.0412848
293.641	309.905	-0.0407212
294.23	309.697	-0.0408097
294.202	310.352	-0.0407965
293.576	310.596	-0.0406884
289.141	309.905	-0.0395725
289.73	309.697	-0.0397524
289.702	310.352	-0.0397311
289.076	310.596	-0.0395255
284.635	309.909	-0.0376197
285.228	309.698	-0.037914
285.198	310.355	-0.0378811
284.559	310.605	-0.0375502
309.18	300.959	-0.0411042
308.487	301.305	-0.0411843
308.648	300.686	-0.0410886
313.68	300.959	-0.040581
312.987	301.305	-0.04073
313.148	300.686	-0.040609
318.18	300.959	-0.0395043
317.487	301.305	-0.0397613
317.648	300.686	-0.0396076
322.679	300.958	-0.0376409
321.987	301.305	-0.038031
322.147	300.685	-0.0378396
302.614	311.137	-0.0415286
302.721	310.342	-0.041566
303.166	310.706	-0.0415617
303.288	311.212	-0.0415311
298.14	314.407	-0.0410628
298.729	314.203	-0.0411109
298.702	314.856	-0.0410673
298.076	315.096	-0.041
293.641	314.405	-0.0404469
294.23	314.197	-0.0405512
294.202	314.852	-0.0405001
293.576	315.096	-0.0403724
289.141	314.405	-0.0392653
289.73	314.197	-0.0394622
289.702	314.852	-0.0393999
289.076	315.096	-0.0391732
284.635	314.409	-0.0372802
285.228	314.198	-0.0375925
285.198	314.855	-0.0375148
284.56	315.106	-0.037161
309.18	296.459	-0.0403692
308.487	296.805	-0.040498
308.648	296.186	-0.0403332
313.68	296.459	-0.0397639
312.987	296.805	-0.0399621
313.148	296.186	-0.039772
318.18	296.459	-0.0385998
317.487	296.805	-0.0389093
317.648	296.186	-0.0386823
322.684	296.475	-0.036646
321.987	296.805	-0.0370905
322.148	296.187	-0.0368184
298.137	323.404	-0.0392623
298.727	323.207	-0.0393748
298.7	323.858	-0.0391489
298.075	324.096	-0.0390021
293.637	323.404	-0.0385493
294.227	323.206	-0.0387251
294.199	323.858	-0.0384877
293.575	324.096	-0.0382731
289.137	323.404	-0.0372316
289.727	323.206	-0.0375063
289.699	323.858	-0.0372514
289.075	324.096	-0.0369312
284.64	323.407	-0.0350977
285.228	323.206	-0.0354882
285.2	323.858	-0.0352123
284.576	324.096	-0.0347706
302.614	324.638	-0.0391266
302.72	323.842	-0.0394458
303.166	324.206	-0.0393184
303.288	324.712	-0.0391066
298.143	327.89	-0.0372607
298.729	327.7	-0.0374123
298.701	328.346	-0.0370735
298.078	328.556	-0.036897
293.656	327.885	-0.0364938
294.231	327.694	-0.0367085
294.202	328.342	-0.0363579
293.583	328.557	-0.0361093
289.155	327.884	-0.0350894
289.73	327.697	-0.0354016
289.702	328.345	-0.0350331
289.085	328.558	-0.0346784
284.647	327.89	-0.0328612
285.231	327.694	-0.0332926
285.202	328.342	-0.0329052
284.583	328.558	-0.0324324
309.18	318.959	-0.0407457
308.487	319.305	-0.0407048
308.648	318.686	-0.0408027
313.68	318.959	-0.0402823
312.987	319.305	-0.0403117
313.148	318.686	-0.0403981
318.18	318.959	-0.039196
317.487	319.305	-0.0393334
317.648	318.686	-0.0394035
322.679	318.958	-0.0372629
321.987	319.305	-0.0375295
322.147	318.685	-0.0375807
302.614	315.637	-0.0412297
302.721	314.842	-0.0413208
303.166	315.206	-0.0412941
303.288	315.712	-0.0412286
302.621	329.075	-0.036995
302.722	328.331	-0.0374119
303.161	328.69	-0.0372303
303.276	329.201	-0.0369364
309.18	291.959	-0.0390274
308.487	292.305	-0.0392226
308.648	291.686	-0.0389541
313.68	291.959	-0.0383391
312.987	292.305	-0.0386079
313.148	291.686	-0.0383137
318.18	291.959	-0.0370617
317.487	292.305	-0.0374478
317.648	291.686	-0.0371132
322.678	291.958	-0.0349686
321.987	292.305	-0.0354968
322.147	291.685	-0.0351129
309.182	287.448	-0.0369188
308.459	287.791	-0.0371792
308.653	287.183	-0.0368157
313.687	287.454	-0.0361491
312.959	287.791	-0.0364916
313.145	287.178	-0.036095
318.183	287.454	-0.0347475
317.459	287.791	-0.0352171
317.643	287.178	-0.0347753
322.673	287.433	-0.032497
321.959	287.791	-0.0331224
322.163	287.187	-0.0326209
280.91	306.06	-0.0356013
280.57	305.333	-0.0354028
281.229	305.373	-0.0357672
281.564	305.959	-0.0359733
280.931	297.066	-0.0345643
280.598	296.367	-0.0341749
281.235	296.374	-0.0345526
281.548	296.935	-0.0349041
280.939	288.068	-0.0305341
280.598	287.367	-0.0298615
281.259	287.369	-0.030293
281.573	287.948	-0.0308831
283.677	331.059	-0.0303772
283.05	331.353	-0.0298129
282.997	330.727	-0.0301405
283.516	330.512	-0.0306039
292.681	331.048	-0.0344518
292.07	331.326	-0.0341175
292	330.717	-0.0344315
292.517	330.501	-0.0347159
305.923	331.038	-0.036019
306.017	330.352	-0.0363928
306.627	330.702	-0.0361882
306.612	331.375	-0.0358378
314.906	331.03	-0.0350215
315.083	330.455	-0.0352999
315.621	330.697	-0.0350056
315.578	331.347	-0.0346632
323.905	331.03	-0.0310327
324.083	330.454	-0.0312686
324.619	330.697	-0.0307728
324.578	331.347	-0.0304203
326.645	306.06	-0.0360262
326.016	305.932	-0.0363701
326.288	305.353	-0.0361708
326.985	305.333	-0.035795
326.641	297.04	-0.0345544
326.013	296.905	-0.0348775
326.307	296.324	-0.0345173
326.957	296.367	-0.0341681
326.614	288.063	-0.0304068
325.978	287.942	-0.0307364
326.289	287.346	-0.0301451
326.957	287.367	-0.0297452
308.037	302.405	-0.0412776
307.799	301.785	-0.0412682
312.537	302.405	-0.0408807
312.299	301.785	-0.0408798
317.037	302.405	-0.0399908
316.799	301.785	-0.0400135
321.537	302.405	-0.0383584
321.299	301.785	-0.0384161
308.037	297.905	-0.0407065
307.799	297.285	-0.0406429
312.537	297.905	-0.0402283
312.299	297.285	-0.0401729
317.037	297.905	-0.0392615
316.799	297.285	-0.0392259
321.537	297.905	-0.0375529
321.299	297.285	-0.0375454
308.037	293.405	-0.0396104
307.799	292.785	-0.0394543
312.537	293.405	-0.0390542
312.299	292.785	-0.0389086
317.037	293.405	-0.0379871
316.799	292.785	-0.0378602
321.537	293.405	-0.0361563
321.299	292.785	-0.0360538
308.037	320.405	-0.0404406
307.799	319.785	-0.0406248
312.537	320.405	-0.0400841
312.299	319.785	-0.040296
317.037	320.405	-0.039159
316.799	319.785	-0.0394165
321.537	320.405	-0.0374228
321.299	319.785	-0.0377383
308.037	288.905	-0.0377679
307.819	288.288	-0.0375021
312.549	288.911	-0.0371409
312.336	288.288	-0.0368825
317.049	288.911	-0.0359591
316.836	288.289	-0.0357174
321.549	288.911	-0.0339813
321.338	288.289	-0.0337576
304.757	303.136	-0.0414195
305.109	303.721	-0.0414579
304.735	304.209	-0.0414768
307.252	304.546	-0.0414652
307.214	304.034	-0.041425
306.932	303.563	-0.0414135
307.305	303.154	-0.0413643
307.482	302.566	-0.0413255
308.845	302.676	-0.0412586
309.303	302.789	-0.04125
309.341	303.294	-0.0412748
309.621	303.741	-0.0412974
309.222	304.203	-0.0413448
311.752	304.546	-0.0411674
311.714	304.034	-0.0411216
311.432	303.563	-0.0411236
311.805	303.154	-0.0410388
311.982	302.566	-0.0409761
313.345	302.676	-0.0407963
313.803	302.789	-0.0407469
313.841	303.294	-0.040776
314.121	303.741	-0.0407772
313.722	304.203	-0.0408707
316.252	304.546	-0.0404074
316.214	304.034	-0.0403605
315.932	303.563	-0.0403926
316.305	303.154	-0.0402552
316.482	302.566	-0.0401623
317.845	302.676	-0.039796
318.303	302.789	-0.0396794
318.341	303.294	-0.0397092
318.621	303.741	-0.0396709
318.222	304.203	-0.0398315
320.752	304.546	-0.0389356
320.714	304.034	-0.0388919
320.432	303.563	-0.0389703
320.805	303.154	-0.0387626
320.982	302.566	-0.0386319
322.345	302.676	-0.0380202
322.803	302.789	-0.0378204
322.84	303.293	-0.0378497
323.116	303.737	-0.0377639
322.712	304.195	-0.0380041
325.963	304.76	-0.0362791
325.294	304.54	-0.0366401
325.218	304.034	-0.0366238
324.932	303.563	-0.0367429
325.274	303.172	-0.0365024
325.389	302.641	-0.0363876
325.881	302.582	-0.0360996
326.246	302.277	-0.035869
326.614	302.558	-0.0356999
304.256	304.633	-0.0414949
303.641	304.989	-0.0415153
303.268	304.638	-0.0414929
302.753	304.485	-0.0414913
302.721	304	-0.0414619
303.34	302.595	-0.0413934
303.778	302.218	-0.0413786
304.301	302.685	-0.0413948
302.472	303.527	-0.0414466
302.793	303.186	-0.0414267
302.837	302.685	-0.0414107
299.287	305.001	-0.0413781
298.747	304.647	-0.0413258
300.329	304.045	-0.0414006
300.281	303.274	-0.0413689
300.605	303.658	-0.0414063
299.697	302.664	-0.0413124
300.211	302.789	-0.0413518
298.852	302.628	-0.0412638
299.262	302.326	-0.0412809
298.3	304.146	-0.0412801
297.975	303.563	-0.0412472
298.286	303.197	-0.0412515
298.339	302.686	-0.0412452
294.787	305.001	-0.0409259
294.247	304.647	-0.0408268
295.826	304.055	-0.0410403
295.863	303.292	-0.0410211
296.127	303.68	-0.0410753
294.353	302.623	-0.0407814
294.765	302.303	-0.0408381
293.8	304.146	-0.0407405
293.475	303.563	-0.0406762
293.786	303.197	-0.040713
293.839	302.686	-0.0407128
290.287	305.001	-0.0399596
289.747	304.647	-0.0397817
291.326	304.055	-0.0402134
291.363	303.292	-0.0401979
291.627	303.68	-0.040287
289.853	302.623	-0.0397449
290.265	302.303	-0.0398606
289.3	304.146	-0.0396267
288.975	303.563	-0.0395078
289.286	303.197	-0.0395928
289.339	302.686	-0.0395972
285.787	305.001	-0.0382286
285.247	304.647	-0.0379498
286.826	304.055	-0.0386667
286.863	303.292	-0.038652
287.127	303.68	-0.0387922
285.347	302.618	-0.0379103
285.78	302.298	-0.0381082
284.8	304.146	-0.0377093
284.476	303.576	-0.0375248
284.785	303.203	-0.0376635
284.839	302.686	-0.0376693
281.553	304.786	-0.0359092
281.708	302.6	-0.0358827
282.227	302.646	-0.0361941
280.871	302.587	-0.0354115
281.298	302.279	-0.0356325
304.757	307.636	-0.0415771
305.109	308.221	-0.0415907
304.735	308.709	-0.0415787
307.252	309.046	-0.0415848
307.214	308.534	-0.0415726
306.932	308.063	-0.041583
307.294	307.674	-0.0415635
307.513	307.172	-0.0415575
307.966	307.155	-0.0415379
308.42	306.871	-0.0415228
308.781	307.177	-0.0415079
309.303	307.289	-0.0414968
309.341	307.794	-0.0414929
309.621	308.241	-0.0414925
309.222	308.703	-0.0415078
311.752	309.046	-0.0413356
311.714	308.534	-0.0413224
311.432	308.063	-0.0413516
311.794	307.674	-0.0412994
312.013	307.172	-0.0412711
312.466	307.155	-0.041213
312.92	306.871	-0.0411553
313.281	307.177	-0.0411096
313.803	307.289	-0.0410485
313.841	307.794	-0.0410447
314.121	308.241	-0.041018
313.722	308.703	-0.0410771
316.252	309.046	-0.0406045
316.214	308.534	-0.0405947
315.932	308.063	-0.0406593
316.294	307.674	-0.0405578
316.513	307.172	-0.0404982
316.966	307.155	-0.0403777
317.42	306.871	-0.0402543
317.781	307.177	-0.0401568
318.303	307.289	-0.0400157
318.341	307.794	-0.0400082
318.621	308.241	-0.0399367
318.222	308.703	-0.0400609
320.752	309.046	-0.0391392
320.714	308.534	-0.0391375
320.432	308.063	-0.0392542
320.794	307.674	-0.0390866
321.013	307.172	-0.038987
321.466	307.155	-0.0387829
321.92	306.871	-0.0385748
322.281	307.177	-0.03841
322.803	307.289	-0.0381693
322.841	307.794	-0.0381548
323.121	308.241	-0.0380275
322.722	308.703	-0.0382271
325.217	309.055	-0.0368682
325.214	308.534	-0.0368545
324.932	308.063	-0.0370158
325.294	307.669	-0.0367986
325.442	307.148	-0.036716
325.866	307.071	-0.0364688
326.217	306.656	-0.0362716
326.805	306.893	-0.0359484
304.256	309.133	-0.0415687
303.641	309.489	-0.0415629
303.268	309.138	-0.0415523
302.753	308.985	-0.0415504
302.724	308.501	-0.0415436
303.414	307.17	-0.0415591
303.821	306.896	-0.0415679
304.305	307.227	-0.0415699
302.485	308.032	-0.0415459
302.814	307.683	-0.0415484
302.948	307.198	-0.0415576
299.288	309.483	-0.0413676
298.747	309.147	-0.0413261
300.309	307.666	-0.0414503
299.709	307.138	-0.0414156
300.21	307.201	-0.0414566
298.866	307.131	-0.0413603
299.288	306.844	-0.041397
298.3	308.646	-0.0412984
297.978	308.071	-0.0412892
298.299	307.699	-0.0413146
298.373	307.179	-0.0413353
294.789	309.467	-0.0408856
294.247	309.147	-0.040801
295.81	307.662	-0.0410577
295.205	307.144	-0.0409819
295.697	307.196	-0.0410591
294.366	307.131	-0.040858
294.788	306.844	-0.0409327
293.8	308.646	-0.0407367
293.478	308.071	-0.0407001
293.799	307.699	-0.0407582
293.873	307.179	-0.0407885
290.289	309.467	-0.0399097
289.747	309.147	-0.0397497
291.31	307.662	-0.0402234
290.705	307.144	-0.0400707
291.197	307.196	-0.0402122
289.866	307.131	-0.0398305
290.288	306.844	-0.0399655
289.3	308.646	-0.0396214
288.978	308.071	-0.0395362
289.299	307.699	-0.0396454
289.373	307.179	-0.0396874
285.789	309.468	-0.0381779
285.247	309.147	-0.0379203
286.81	307.662	-0.0386819
286.205	307.144	-0.0384209
286.697	307.196	-0.0386511
285.366	307.131	-0.0380276
285.788	306.844	-0.0382393
284.8	308.646	-0.037712
284.48	308.074	-0.0375692
284.798	307.7	-0.0377376
284.873	307.179	-0.0377925
281.747	307.084	-0.0360344
282.266	307.14	-0.0363405
280.751	306.893	-0.0354832
281.354	306.672	-0.0358286
304.757	298.636	-0.0409703
305.114	299.22	-0.0410499
304.752	299.708	-0.041112
308.787	300.124	-0.0409835
308.161	300.467	-0.0410766
307.782	300.17	-0.0410541
307.252	300.046	-0.0410782
307.214	299.534	-0.0410014
306.932	299.063	-0.0409593
307.305	298.654	-0.0408704
307.482	298.066	-0.0407786
308.845	298.176	-0.0406961
309.303	298.289	-0.0406885
309.345	298.786	-0.0407521
309.619	299.25	-0.0408067
309.234	299.702	-0.0408937
313.287	300.124	-0.0404816
312.661	300.467	-0.0406342
312.282	300.17	-0.0406367
311.752	300.046	-0.0406993
311.714	299.534	-0.0406161
311.432	299.063	-0.0405864
311.805	298.654	-0.0404626
311.982	298.066	-0.0403472
313.345	298.176	-0.0401541
313.803	298.289	-0.0401066
313.845	298.786	-0.0401755
314.119	299.25	-0.0402118
313.734	299.702	-0.040344
317.787	300.124	-0.0394511
317.161	300.467	-0.0396977
316.782	300.17	-0.0397459
316.252	300.046	-0.0398747
316.214	299.534	-0.0397872
315.932	299.063	-0.0397841
316.305	298.654	-0.0396061
316.482	298.066	-0.0394572
317.845	298.176	-0.039079
318.303	298.289	-0.0389654
318.345	298.786	-0.0390385
318.619	299.25	-0.0390405
318.234	299.702	-0.0392408
322.287	300.124	-0.0376504
321.661	300.467	-0.038016
321.282	300.17	-0.0381279
320.752	300.046	-0.0383489
320.714	299.534	-0.0382591
320.432	299.063	-0.038297
320.805	298.654	-0.0380447
320.982	298.066	-0.0378521
322.345	298.176	-0.0372306
322.803	298.289	-0.0370352
322.845	298.786	-0.0371121
323.12	299.247	-0.0370705
322.733	299.701	-0.0373518
325.239	300.04	-0.0360372
325.214	299.534	-0.0359369
324.932	299.063	-0.0360064
325.274	298.672	-0.0357178
325.388	298.14	-0.0355417
325.868	298.073	-0.0352425
326.22	297.65	-0.0349465
326.808	297.889	-0.0346707
304.309	300.147	-0.0411719
302.752	300.046	-0.0411878
302.723	299.5	-0.0411133
303.34	298.095	-0.040919
[truncated: 4,673 more rows]

## Sheet: Figure-11-c-d
300.289	308.936	-0.0441856
300.838	308.878	-0.0442125
300.407	309.377	-0.0442057
301.011	309.448	-0.0442342
295.789	308.936	-0.0441108
296.324	308.918	-0.0441357
295.907	309.376	-0.0441284
296.449	309.53	-0.0441526
291.289	308.936	-0.0441763
291.824	308.918	-0.0441816
291.407	309.376	-0.0441883
291.949	309.53	-0.0441917
286.789	308.936	-0.0442292
287.324	308.918	-0.0442615
286.907	309.376	-0.0442442
287.449	309.53	-0.0442721
300.289	313.436	-0.044176
300.838	313.378	-0.0442066
300.407	313.877	-0.0441988
301.011	313.948	-0.0442311
295.789	313.436	-0.0441041
296.324	313.418	-0.0441267
295.907	313.876	-0.0441314
296.449	314.03	-0.0441559
291.289	313.436	-0.0441732
291.824	313.418	-0.0441799
291.407	313.876	-0.0442004
291.949	314.03	-0.0442106
286.789	313.436	-0.0441964
287.324	313.418	-0.0442321
286.907	313.876	-0.0442248
287.449	314.03	-0.0442619
282.289	322.438	-0.0442011
282.824	322.418	-0.0443072
282.408	322.876	-0.044258
282.947	323.035	-0.0443706
300.289	326.936	-0.0443488
300.838	326.878	-0.0443845
300.407	327.377	-0.0443279
301.013	327.444	-0.0443543
295.789	326.936	-0.0443101
296.324	326.918	-0.0443214
295.907	327.376	-0.0442876
296.455	327.533	-0.0442817
291.289	326.936	-0.0445717
291.824	326.918	-0.0445537
291.407	327.376	-0.0445448
291.961	327.538	-0.0445085
286.789	326.936	-0.0446467
287.324	326.918	-0.044686
286.907	327.376	-0.0446303
287.456	327.533	-0.0446514
282.774	302.723	-0.0439942
283.21	303.128	-0.0440501
282.503	303.191	-0.0438926
282.758	303.709	-0.0439276
300.728	307.947	-0.0441993
301.296	308.242	-0.044223
300.503	308.473	-0.0441818
296.228	307.947	-0.0441286
296.768	308.337	-0.0441476
296.003	308.473	-0.0441075
291.728	307.947	-0.0441828
292.268	308.337	-0.0441777
291.503	308.473	-0.0441679
287.228	307.947	-0.0442638
287.768	308.337	-0.0442761
287.003	308.473	-0.044237
282.803	307.214	-0.04384
283.231	307.609	-0.043901
282.503	307.691	-0.0437367
282.761	308.212	-0.0437797
300.728	312.447	-0.044188
301.296	312.742	-0.0442195
300.503	312.973	-0.0441712
296.228	312.447	-0.0441001
296.768	312.837	-0.0441261
296.003	312.973	-0.04409
291.728	312.447	-0.0441512
292.268	312.837	-0.0441591
291.503	312.973	-0.0441511
287.228	312.447	-0.0442082
287.768	312.837	-0.044234
287.003	312.973	-0.0441932
282.789	311.707	-0.0437545
283.229	312.108	-0.0438276
282.503	312.191	-0.0436674
282.761	312.712	-0.0437239
282.774	293.722	-0.0446841
283.21	294.128	-0.0447386
282.503	294.191	-0.0445754
282.758	294.709	-0.0445987
282.728	321.447	-0.0442182
283.262	321.842	-0.0443451
282.503	321.973	-0.0442031
300.728	325.947	-0.0444284
301.296	326.242	-0.0444448
300.503	326.473	-0.0443807
296.228	325.947	-0.0443714
296.768	326.337	-0.0443614
296.003	326.473	-0.0443308
291.728	325.947	-0.0446041
292.268	326.337	-0.0445596
291.503	326.473	-0.0445812
287.228	325.947	-0.0447312
287.768	326.337	-0.0447361
287.003	326.473	-0.0446827
282.808	325.223	-0.0443263
283.232	325.61	-0.0443742
282.503	325.691	-0.0442154
282.761	326.212	-0.0442304
288.744	330.689	-0.0441825
288.343	330.051	-0.0443102
289.031	330.172	-0.0442544
288.795	329.688	-0.0443663
295.341	301.966	-0.0443385
296.004	302.161	-0.0443303
295.372	302.535	-0.0442774
295.911	302.815	-0.0442737
290.841	301.966	-0.0444645
291.504	302.161	-0.0444439
290.872	302.535	-0.0443965
291.411	302.815	-0.0443803
286.329	301.965	-0.0444572
287	302.153	-0.04449
286.372	302.535	-0.0444034
286.911	302.815	-0.0444293
295.341	297.466	-0.0446037
296.004	297.661	-0.0445759
295.372	298.035	-0.0445287
295.906	298.32	-0.0445055
290.841	297.466	-0.0448001
291.504	297.661	-0.0447685
290.872	298.035	-0.0447143
291.406	298.32	-0.0446862
286.341	297.466	-0.0447936
287.004	297.661	-0.0448177
286.372	298.035	-0.0447021
286.906	298.32	-0.0447173
282.728	298.947	-0.0441848
283.293	299.349	-0.0442697
282.505	299.522	-0.0440878
282.919	299.983	-0.0441641
295.341	292.966	-0.044871
296.004	293.161	-0.0448434
295.372	293.535	-0.0448119
295.906	293.82	-0.044788
290.841	292.966	-0.0451449
291.504	293.161	-0.0451085
290.872	293.535	-0.0450763
291.406	293.82	-0.045045
286.329	292.965	-0.0451728
286.999	293.154	-0.0452085
286.372	293.535	-0.0451165
286.906	293.82	-0.0451391
295.341	319.966	-0.0443448
296.004	320.161	-0.0443495
295.372	320.535	-0.044337
295.911	320.815	-0.0443495
290.841	319.966	-0.0445075
291.504	320.161	-0.044504
290.872	320.535	-0.0445099
291.411	320.815	-0.0445172
286.33	319.965	-0.0445271
287	320.153	-0.0445798
286.372	320.535	-0.0445489
286.911	320.815	-0.0446034
300.7	316.942	-0.0442065
301.296	317.242	-0.0442453
300.49	317.526	-0.0442047
300.85	317.974	-0.0442577
296.228	316.947	-0.0441811
296.779	317.323	-0.0442093
295.997	317.515	-0.044191
296.373	317.95	-0.0442395
291.728	316.947	-0.0442807
292.279	317.323	-0.0443013
291.497	317.515	-0.0443033
291.873	317.95	-0.0443505
287.228	316.947	-0.0443115
287.779	317.323	-0.0443676
286.997	317.515	-0.0443245
287.373	317.95	-0.0444022
282.728	316.947	-0.043841
283.293	317.349	-0.0439813
282.505	317.522	-0.0438304
282.919	317.983	-0.0439732
299.819	288.482	-0.0446064
300.502	288.675	-0.0446165
299.844	289.059	-0.044631
300.405	289.323	-0.0446486
295.341	288.466	-0.0447436
296.003	288.661	-0.0447412
295.372	289.035	-0.0447621
295.906	289.32	-0.0447718
290.819	288.48	-0.0450587
291.506	288.667	-0.0450449
290.845	289.057	-0.0450804
291.406	289.321	-0.0450792
286.33	288.465	-0.0450022
286.999	288.654	-0.0450864
286.372	289.035	-0.0450406
286.906	289.32	-0.045119
282.728	289.947	-0.0445777
283.287	290.354	-0.0447447
282.505	290.522	-0.0445717
282.919	290.983	-0.0447181
308.395	301.883	-0.0442869
309.03	301.691	-0.0442994
308.625	302.227	-0.0442754
309.232	302.305	-0.0442985
312.895	301.883	-0.0443628
313.53	301.691	-0.0443944
313.125	302.227	-0.0443536
313.732	302.305	-0.0443939
317.395	301.883	-0.0445532
318.03	301.691	-0.0445862
317.625	302.227	-0.044546
318.232	302.305	-0.0445867
321.895	301.883	-0.0445615
322.53	301.691	-0.0445192
322.125	302.227	-0.0445369
322.73	302.306	-0.0445041
300.849	304.184	-0.0442572
300.882	304.877	-0.0442647
300.352	304.52	-0.0442387
300.275	304.99	-0.0442514
296.328	304.215	-0.0442364
296.349	304.913	-0.0442333
295.828	304.522	-0.0442137
295.753	305	-0.0442207
296.539	302.593	-0.044311
296.36	303.185	-0.0442719
291.828	304.215	-0.0443154
291.849	304.913	-0.0443041
291.328	304.522	-0.0443045
291.253	305	-0.0443089
292.039	302.593	-0.0444058
291.86	303.185	-0.0443626
287.328	304.215	-0.044396
287.349	304.913	-0.0443863
286.828	304.522	-0.0443597
286.753	305	-0.0443584
287.539	302.593	-0.0444853
287.36	303.185	-0.0444392
282.588	304.683	-0.0438851
282.471	305.296	-0.0438517
282.104	304.75	-0.0437728
281.834	305.335	-0.0437181
283.414	303.851	-0.0440555
300.734	307.396	-0.044221
301.318	307.669	-0.0442331
296.256	307.337	-0.0441592
296.806	307.588	-0.0441672
291.756	307.337	-0.0442148
292.306	307.588	-0.0441997
287.256	307.337	-0.0442959
287.806	307.588	-0.0443002
283.415	308.353	-0.0439118
308.395	297.383	-0.0443346
309.03	297.191	-0.0443558
308.625	297.727	-0.0443058
309.232	297.805	-0.0443272
312.895	297.383	-0.0444343
313.53	297.191	-0.0444786
313.125	297.727	-0.0444127
313.732	297.805	-0.0444548
317.395	297.383	-0.0446506
318.03	297.191	-0.0446956
317.625	297.727	-0.0446246
318.232	297.805	-0.0446613
321.895	297.383	-0.0446565
322.53	297.191	-0.0446337
322.125	297.727	-0.0446019
322.721	297.811	-0.0445685
296.539	298.093	-0.0445326
296.353	298.698	-0.0444829
292.039	298.093	-0.0447134
291.853	298.698	-0.044654
287.539	298.093	-0.0447948
287.353	298.698	-0.0447147
282.764	298.325	-0.044268
283.31	298.579	-0.0443437
300.734	311.896	-0.0442058
301.318	312.169	-0.044227
296.256	311.837	-0.0441186
296.806	312.087	-0.0441322
291.756	311.837	-0.0441657
292.306	312.087	-0.0441593
287.256	311.837	-0.044226
287.806	312.087	-0.0442391
283.415	312.852	-0.0438581
308.395	292.883	-0.04451
309.03	292.691	-0.0445225
308.625	293.227	-0.0444791
309.232	293.305	-0.0444943
312.895	292.883	-0.0445828
313.53	292.691	-0.044628
313.125	293.227	-0.0445683
313.732	293.305	-0.0446166
317.395	292.883	-0.044857
318.03	292.691	-0.044904
317.625	293.227	-0.0448385
318.232	293.305	-0.0448821
321.895	292.883	-0.0448801
322.53	292.691	-0.0448412
322.125	293.227	-0.0448417
322.73	293.306	-0.0448053
296.539	293.593	-0.0448054
296.353	294.198	-0.0447647
292.039	293.593	-0.0450552
291.853	294.198	-0.0450106
287.539	293.593	-0.0452011
287.353	294.198	-0.0451408
282.59	295.682	-0.0445134
282.483	296.299	-0.0444443
282.107	295.747	-0.0443987
281.826	296.313	-0.0443066
283.413	294.851	-0.044723
308.395	319.883	-0.044567
309.03	319.691	-0.0445975
308.625	320.227	-0.0445765
309.232	320.305	-0.0446263
312.895	319.883	-0.0448252
313.53	319.691	-0.0448682
313.125	320.227	-0.0448433
313.732	320.305	-0.0449084
317.395	319.883	-0.0451432
318.03	319.691	-0.0451719
317.625	320.227	-0.0451661
318.232	320.305	-0.0452209
321.895	319.883	-0.0451979
322.53	319.691	-0.0451423
322.125	320.227	-0.0452034
322.73	320.306	-0.0451784
300.849	322.184	-0.0444167
300.882	322.877	-0.0444596
300.352	322.52	-0.044406
300.275	322.99	-0.0444418
296.328	322.215	-0.0444031
296.349	322.913	-0.0444388
295.828	322.522	-0.0444066
295.753	323	-0.0444414
296.539	320.593	-0.0443618
296.36	321.185	-0.0443697
291.828	322.215	-0.0445787
291.849	322.913	-0.0446226
291.328	322.522	-0.0446028
291.253	323	-0.0446469
292.039	320.593	-0.0445086
291.86	321.185	-0.0445304
287.328	322.215	-0.0447124
287.349	322.913	-0.0447623
286.828	322.522	-0.0447041
286.753	323	-0.0447417
287.539	320.593	-0.0446271
287.36	321.185	-0.0446515
282.752	320.859	-0.0441971
283.282	321.111	-0.0443056
300.734	325.396	-0.0444667
301.318	325.669	-0.0444801
296.256	325.337	-0.044418
296.806	325.588	-0.0444104
291.756	325.337	-0.0446401
292.306	325.588	-0.0445994
287.256	325.337	-0.0447725
287.806	325.588	-0.044779
283.416	326.353	-0.0443496
281.437	324.711	-0.0440746
281.054	324.167	-0.0440282
281.829	324	-0.0441798
281.346	323.612	-0.0440864
282.091	324.649	-0.0442141
300.746	316.388	-0.0442178
301.318	316.669	-0.0442415
296.256	316.34	-0.0441818
296.807	316.587	-0.0441932
291.756	316.34	-0.0442714
292.307	316.587	-0.0442731
287.256	316.34	-0.0443008
287.807	316.587	-0.0443338
282.756	316.329	-0.0438301
283.308	316.581	-0.0439406
288.021	330.661	-0.0442064
308.396	288.368	-0.0443473
309.027	288.193	-0.0443265
308.625	288.727	-0.0443681
309.229	288.812	-0.0443846
312.9	288.368	-0.0443936
313.535	288.192	-0.0444178
313.125	288.727	-0.0444248
313.731	288.81	-0.0444846
317.399	288.368	-0.0446943
318.028	288.193	-0.0447075
317.625	288.727	-0.0447271
318.228	288.811	-0.0447725
321.9	288.368	-0.0446163
322.528	288.193	-0.0445277
322.125	288.727	-0.0446256
322.726	288.811	-0.0445805
301.039	289.093	-0.0446418
300.849	289.702	-0.0446733
296.539	289.093	-0.0447618
296.353	289.698	-0.0447936
292.039	289.093	-0.0450458
291.853	289.698	-0.0450842
287.539	289.093	-0.045161
287.353	289.698	-0.0451854
282.754	289.35	-0.0445343
283.29	289.607	-0.0446806
324.137	285.933	-0.0438245
323.474	285.597	-0.0438747
324.361	285.354	-0.0436485
324.026	284.9	-0.0436338
301.085	284.45	-0.0439785
300.356	284.679	-0.0440147
299.622	284.373	-0.0439809
289.958	284.373	-0.0444717
289.202	284.667	-0.0445353
288.46	284.449	-0.0445155
280.054	328.843	-0.0433519
280.283	329.578	-0.0432313
280.016	330.291	-0.0430244
280.046	301.856	-0.0435225
280.28	302.593	-0.0435086
279.984	303.323	-0.0434153
324.454	296.801	-0.0444676
324.14	297.22	-0.044486
323.859	296.698	-0.0445529
323.645	297.178	-0.0445509
305.756	305.992	-0.0443403
305.638	305.525	-0.0443265
306.183	305.741	-0.0443416
306.134	305.151	-0.0443255
310.307	305.869	-0.0444175
310.178	305.408	-0.0443939
310.705	305.667	-0.0444112
310.673	305.091	-0.0443874
314.807	305.869	-0.0445488
314.678	305.408	-0.0445191
315.205	305.667	-0.0445549
315.173	305.091	-0.0445282
319.307	305.869	-0.0447476
319.178	305.408	-0.0447188
319.705	305.667	-0.0447424
319.673	305.091	-0.0447147
305.756	310.493	-0.0443725
305.637	310.025	-0.0443549
306.183	310.241	-0.044378
306.134	309.652	-0.0443596
310.307	310.369	-0.0444938
310.178	309.908	-0.0444709
310.705	310.167	-0.0444913
310.673	309.591	-0.0444689
314.807	310.369	-0.0446507
314.678	309.908	-0.0446202
315.205	310.167	-0.044658
315.173	309.591	-0.0446307
319.307	310.369	-0.0448553
319.178	309.908	-0.0448287
319.705	310.167	-0.0448508
319.673	309.591	-0.044826
323.79	310.39	-0.0446095
323.68	309.969	-0.0446051
324.191	310.201	-0.0445376
324.127	309.66	-0.0445261
305.756	314.993	-0.0443906
305.637	314.525	-0.0443757
306.183	314.741	-0.0443989
306.134	314.152	-0.0443846
310.307	314.869	-0.0445535
310.178	314.408	-0.0445287
310.705	314.667	-0.0445569
310.673	314.091	-0.0445339
314.807	314.869	-0.0447664
314.678	314.408	-0.0447305
315.205	314.667	-0.0447737
315.173	314.091	-0.0447407
319.307	314.869	-0.0449628
319.178	314.408	-0.0449325
319.705	314.667	-0.0449526
319.673	314.091	-0.0449238
323.79	314.89	-0.0447079
323.681	314.469	-0.0446971
324.193	314.702	-0.0446356
324.128	314.161	-0.0446168
305.756	323.992	-0.0446712
305.638	323.525	-0.0446438
306.183	323.741	-0.0446766
306.134	323.151	-0.0446433
310.307	323.869	-0.0448799
310.178	323.408	-0.0448474
310.705	323.667	-0.0448896
310.673	323.091	-0.0448584
314.807	323.869	-0.0452225
314.678	323.408	-0.0451822
315.205	323.667	-0.0452463
315.173	323.091	-0.0452083
319.307	323.869	-0.0455525
319.178	323.408	-0.0455154
319.705	323.667	-0.0455479
319.673	323.091	-0.0455082
305.749	328.487	-0.0444252
305.639	328.019	-0.0444706
306.177	328.243	-0.0444707
306.135	327.647	-0.0445282
310.311	328.362	-0.0446626
310.179	327.906	-0.0446952
310.703	328.162	-0.0447001
310.659	327.607	-0.0447451
319.311	328.362	-0.045371
319.179	327.906	-0.0454061
319.704	328.161	-0.045391
319.659	327.607	-0.0454371
283.774	302.011	-0.0442107
283.64	301.358	-0.0442312
284.409	301.495	-0.0443178
283.996	300.884	-0.0443047
283.133	301.784	-0.0441225
283.253	302.426	-0.0441032
283.817	302.705	-0.0441727
296.66	306.254	-0.0442192
297.411	306.326	-0.0442213
296.782	306.894	-0.0441949
297.389	307.143	-0.04419
292.16	306.254	-0.0442671
292.911	306.326	-0.0442405
292.282	306.894	-0.0442331
292.889	307.143	-0.0442024
287.66	306.254	-0.0443622
288.411	306.326	-0.0443537
287.782	306.894	-0.0443328
288.389	307.143	-0.0443144
283.17	306.217	-0.0439612
283.861	306.351	-0.0440625
283.299	306.878	-0.0439507
283.864	307.156	-0.0440243
283.161	297.239	-0.0444801
283.86	297.354	-0.0445732
283.278	297.882	-0.0444211
283.865	298.15	-0.0444773
296.671	310.76	-0.0441594
297.412	310.826	-0.0441669
296.783	311.394	-0.0441473
297.389	311.643	-0.0441489
292.171	310.76	-0.0441887
292.912	310.826	-0.0441668
292.283	311.394	-0.0441731
292.889	311.643	-0.0441509
287.671	310.76	-0.0442699
288.412	310.826	-0.0442655
287.783	311.394	-0.0442552
288.389	311.643	-0.0442456
283.141	310.738	-0.0438497
283.859	310.851	-0.0439607
283.29	311.377	-0.0438581
283.863	311.656	-0.0439401
283.774	293.011	-0.0449062
283.64	292.358	-0.0449062
284.409	292.495	-0.0450088
283.995	291.884	-0.0449604
283.133	292.783	-0.0448064
283.254	293.426	-0.0447979
283.817	293.704	-0.0448706
283.771	320.017	-0.0443072
283.638	319.362	-0.0442378
284.409	319.495	-0.0443366
283.995	318.885	-0.0442389
283.128	319.796	-0.0441948
283.237	320.449	-0.0442592
283.823	320.703	-0.0443591
296.66	324.254	-0.0444674
297.411	324.326	-0.0444606
296.782	324.894	-0.0444473
297.389	325.143	-0.0444335
292.16	324.254	-0.0446528
292.911	324.326	-0.0446012
292.282	324.894	-0.0446317
292.889	325.143	-0.0445778
287.66	324.254	-0.0448183
288.411	324.326	-0.0448136
287.782	324.894	-0.0448083
288.389	325.143	-0.044796
283.168	324.244	-0.0444322
283.913	324.323	-0.0445391
283.287	324.875	-0.0444306
283.89	325.114	-0.0445062
296.671	315.26	-0.0441886
297.412	315.326	-0.0441882
296.782	315.899	-0.0441903
297.388	316.149	-0.0441884
292.171	315.26	-0.0442521
292.912	315.326	-0.0442308
292.282	315.899	-0.0442603
292.888	316.149	-0.0442451
287.671	315.26	-0.0443048
288.412	315.326	-0.0443116
287.782	315.899	-0.0443175
288.388	316.149	-0.0443268
283.139	315.249	-0.0438806
283.859	315.355	-0.0439915
283.266	315.887	-0.0439141
283.866	316.153	-0.0440093
283.772	288.509	-0.0446542
283.638	287.837	-0.0445285
284.382	288.017	-0.0446898
284.001	287.345	-0.0445132
283.149	288.278	-0.044493
283.249	288.934	-0.0446025
283.827	289.196	-0.0447437
324.348	306.268	-0.0444371
324.84	306.146	-0.0443418
324.572	306.748	-0.0443923
325.14	306.655	-0.0442819
324.391	324.278	-0.0452515
324.897	324.133	-0.045161
324.615	324.799	-0.0451944
325.163	324.649	-0.0450984
314.644	328.774	-0.044962
314.785	329.188	-0.0449099
314.193	329.007	-0.0448634
314.306	329.535	-0.0447884
323.625	328.779	-0.0450063
323.765	329.2	-0.0449024
323.181	328.989	-0.0450234
323.289	329.536	-0.0449056
310.834	287.553	-0.0442749
310.71	287.097	-0.0441959
311.306	287.33	-0.0442338
311.241	286.721	-0.0441275
315.355	287.568	-0.0445034
315.209	287.081	-0.0444116
315.81	287.35	-0.0444915
315.74	286.755	-0.0443862
319.869	287.575	-0.0446672
319.715	287.038	-0.044578
320.409	287.33	-0.0445947
320.266	286.78	-0.0445042
302.416	302.265	-0.0442923
302.439	301.586	-0.0443097
303.06	302.016	-0.0442749
302.998	301.241	-0.0442921
301.407	302.14	-0.0443177
301.334	302.866	-0.0442897
300.727	302.337	-0.0442985
300.749	303.101	-0.0442692
307.338	305.757	-0.044336
307.968	306.031	-0.0443387
307.273	306.545	-0.0443348
307.95	306.68	-0.0443336
311.837	305.751	-0.0444051
312.467	306.03	-0.0444141
311.767	306.533	-0.0444092
312.45	306.68	-0.0444123
316.337	305.751	-0.0445839
316.967	306.03	-0.044609
316.267	306.533	-0.0445891
316.95	306.68	-0.0446092
320.836	305.75	-0.0447156
321.467	306.03	-0.0446909
320.767	306.533	-0.0447295
321.45	306.68	-0.044696
302.416	297.765	-0.0443923
302.439	297.086	-0.0444371
303.06	297.516	-0.0443735
302.998	296.741	-0.0444257
301.407	297.643	-0.0444406
301.333	298.378	-0.0443882
300.727	297.841	-0.044426
300.751	298.615	-0.0443711
307.338	310.257	-0.0443856
307.968	310.531	-0.0443939
307.273	311.045	-0.044382
307.95	311.18	-0.0443862
311.837	310.251	-0.0444927
312.467	310.53	-0.044505
311.767	311.033	-0.0444945
312.45	311.18	-0.044502
316.337	310.251	-0.0446901
316.967	310.53	-0.0447161
316.267	311.033	-0.0446948
316.95	311.18	-0.0447155
320.837	310.251	-0.0448213
321.467	310.53	-0.0447927
320.767	311.033	-0.0448297
321.45	311.18	-0.0447929
302.416	293.265	-0.0446291
302.439	292.586	-0.0446709
303.06	293.016	-0.044606
302.998	292.241	-0.0446509
301.407	293.143	-0.0446844
301.333	293.878	-0.0446294
300.727	293.341	-0.0446747
300.751	294.115	-0.0446142
302.416	320.265	-0.0443892
302.439	319.59	-0.0443739
303.06	320.016	-0.0443781
302.997	319.244	-0.0443567
301.407	320.14	-0.0443821
301.334	320.866	-0.0443908
300.727	320.337	-0.044358
300.749	321.101	-0.0443704
307.338	323.757	-0.0446991
307.968	324.031	-0.0447228
307.273	324.545	-0.0447045
307.95	324.68	-0.0447199
311.837	323.751	-0.0449345
312.467	324.03	-0.0449724
311.767	324.533	-0.0449297
312.45	324.68	-0.0449613
316.337	323.751	-0.0453249
316.967	324.03	-0.0453761
316.267	324.533	-0.0453335
316.95	324.68	-0.0453787
320.836	323.75	-0.0455265
321.467	324.03	-0.0455035
320.767	324.533	-0.0455375
321.45	324.68	-0.0455002
307.338	314.757	-0.0444115
307.968	315.031	-0.0444229
307.273	315.545	-0.0444046
307.95	315.68	-0.0444135
311.837	314.751	-0.0445756
312.467	315.03	-0.0445989
311.767	315.533	-0.044582
312.45	315.68	-0.0446022
316.337	314.751	-0.0448097
316.967	315.03	-0.0448393
316.267	315.533	-0.0448263
316.95	315.68	-0.0448502
320.837	314.751	-0.0449148
321.467	315.03	-0.0448856
320.767	315.533	-0.0449326
321.45	315.68	-0.0448943
307.334	328.269	-0.0444951
307.965	328.542	-0.0444778
307.255	329.079	-0.0443702
307.949	329.2	-0.0443704
311.835	328.242	-0.0447353
312.461	328.529	-0.0447366
311.758	328.996	-0.0446259
312.45	329.18	-0.0446353
316.33	328.278	-0.0451662
316.964	328.544	-0.0451807
316.248	329.085	-0.0450504
316.947	329.198	-0.0450824
320.836	328.242	-0.0453354
321.462	328.529	-0.0452539
320.762	328.999	-0.0452328
321.45	329.18	-0.0451511
293.03	330.202	-0.0440575
292.624	329.898	-0.0441478
293.214	329.747	-0.0441178
292.788	329.319	-0.044232
284.022	330.218	-0.0439028
283.62	329.897	-0.0438964
284.18	329.788	-0.0440083
283.78	329.322	-0.0440355
302.391	288.776	-0.0445659
302.462	288.088	-0.0445
303.06	288.517	-0.0445037
302.991	287.745	-0.0444242
308.812	304.493	-0.0442949
309.228	304.82	-0.0443209
308.491	304.882	-0.044297
308.703	305.541	-0.0443374
307.949	305.352	-0.044319
307.846	304.769	-0.0442822
307.318	305.115	-0.0443146
313.312	304.493	-0.0443745
313.728	304.82	-0.044413
312.991	304.882	-0.0443714
313.203	305.541	-0.0444212
312.449	305.351	-0.0443892
312.346	304.769	-0.0443458
311.819	305.114	-0.0443778
317.812	304.493	-0.0445753
318.228	304.82	-0.0446176
317.491	304.882	-0.0445706
317.703	305.541	-0.0446258
316.949	305.351	-0.0445812
316.846	304.769	-0.0445339
316.319	305.114	-0.0445542
322.312	304.493	-0.0445665
322.694	304.793	-0.0445548
321.991	304.882	-0.0446
322.192	305.535	-0.0446286
321.447	305.35	-0.044664
321.346	304.769	-0.0446267
320.819	305.114	-0.0446863
299.825	304.761	-0.0442193
299.832	305.336	-0.0442405
295.301	304.746	-0.044195
295.332	305.336	-0.0442096
290.801	304.746	-0.0442967
290.832	305.336	-0.0443063
286.301	304.746	-0.0443146
286.332	305.336	-0.0443251
282.951	304.298	-0.0439616
282.376	304.213	-0.0438305
308.812	308.993	-0.0443628
309.228	309.32	-0.0443919
308.491	309.382	-0.0443607
308.703	310.041	-0.0444013
307.949	309.852	-0.0443759
307.846	309.269	-0.0443393
307.318	309.615	-0.0443649
313.312	308.993	-0.0444687
313.728	309.32	-0.0445095
312.991	309.382	-0.0444651
313.203	310.041	-0.0445164
312.449	309.851	-0.0444807
312.346	309.269	-0.0444367
311.819	309.614	-0.0444662
317.812	308.993	-0.0446846
318.228	309.32	-0.044728
317.491	309.382	-0.0446793
317.703	310.041	-0.0447345
316.949	309.851	-0.0446888
316.846	309.269	-0.0446408
316.319	309.614	-0.0446602
322.312	308.993	-0.0446756
322.728	309.32	-0.0446593
321.991	309.382	-0.0447083
322.203	310.041	-0.044731
321.449	309.851	-0.0447709
321.346	309.269	-0.044738
320.819	309.614	-0.0447965
326.306	309.714	-0.0440924
325.792	310.094	-0.0442164
325.776	309.36	-0.0441737
325.277	309.701	-0.0443062
299.82	309.207	-0.0441634
299.872	309.748	-0.0441902
295.32	309.207	-0.0440925
295.363	309.756	-0.0441182
290.82	309.207	-0.0441718
290.863	309.756	-0.0441945
286.32	309.207	-0.0441903
286.363	309.756	-0.04421
282.11	309.588	-0.0436529
281.759	310.115	-0.043576
281.701	309.377	-0.0435495
281.215	309.7	-0.0434578
282.93	308.818	-0.0438169
282.498	309.27	-0.0437312
282.356	308.716	-0.043684
282.11	309.133	-0.0436433
326.347	300.835	-0.0439471
325.85	301.126	-0.0440514
325.8	300.374	-0.0440293
325.282	300.697	-0.0441492
303.839	300.386	-0.0442561
303.507	300.852	-0.0442735
303.33	300.249	-0.044255
302.848	300.575	-0.0442895
282.198	300.65	-0.0439938
281.869	301.152	-0.0439016
281.734	300.388	-0.0438867
281.224	300.767	-0.0437768
308.812	313.493	-0.0444083
309.228	313.82	-0.0444396
308.491	313.882	-0.0444007
308.703	314.541	-0.0444396
307.949	314.352	-0.0444084
307.846	313.769	-0.044375
307.318	314.115	-0.0443948
313.312	313.493	-0.0445632
313.728	313.82	-0.0446088
312.991	313.882	-0.0445579
313.203	314.541	-0.0446151
312.449	314.351	-0.0445696
312.346	313.769	-0.0445225
311.819	314.114	-0.0445465
317.812	313.493	-0.0447903
318.228	313.82	-0.0448334
317.491	313.882	-0.0447882
317.703	314.541	-0.0448487
316.949	314.351	-0.0448032
316.846	313.769	-0.0447503
316.319	314.114	-0.0447728
322.312	313.493	-0.0447598
322.728	313.82	-0.0447437
321.991	313.882	-0.0447932
322.203	314.541	-0.0448187
321.449	314.351	-0.0448588
321.346	313.769	-0.0448245
320.819	314.114	-0.0448864
326.352	314.239	-0.0441881
325.809	314.618	-0.0443211
325.786	313.871	-0.044267
325.271	314.209	-0.044405
299.82	313.707	-0.044153
299.872	314.248	-0.0441834
295.32	313.707	-0.044094
295.363	314.256	-0.044134
290.82	313.707	-0.0441754
290.863	314.256	-0.044218
286.32	313.707	-0.044162
286.363	314.256	-0.0441985
282.109	314.09	-0.0436436
281.754	314.626	-0.0435886
281.701	313.878	-0.0435345
281.193	314.243	-0.043455
282.93	313.318	-0.0437783
282.498	313.771	-0.0437089
282.356	313.216	-0.0436445
282.11	313.633	-0.0436183
303.839	295.886	-0.0444157
303.507	296.352	-0.0444172
303.33	295.749	-0.0444265
302.848	296.075	-0.0444534
282.949	295.3	-0.0446086
282.376	295.212	-0.0444821
308.812	322.493	-0.0446707
309.228	322.82	-0.0447223
308.491	322.882	-0.0446712
308.703	323.541	-0.0447362
307.949	323.352	-0.0446893
307.846	322.769	-0.0446317
307.318	323.115	-0.044661
313.312	322.493	-0.0449545
313.728	322.82	-0.0450201
312.991	322.882	-0.0449447
313.203	323.541	-0.0450144
312.449	323.351	-0.0449444
312.346	322.769	-0.0448873
311.819	323.114	-0.0449013
317.812	322.493	-0.0453195
318.228	322.82	-0.0453831
317.491	322.882	-0.045322
317.703	323.541	-0.0454031
316.949	323.351	-0.0453336
316.846	322.769	-0.0452642
316.319	323.114	-0.0452799
322.312	322.493	-0.0453565
322.694	322.793	-0.0453571
321.991	322.882	-0.0453992
322.192	323.535	-0.0454419
321.447	323.35	-0.0454714
321.346	322.769	-0.0454192
320.819	323.114	-0.0454867
299.825	322.761	-0.0443916
299.832	323.336	-0.0444422
295.301	322.746	-0.0444107
295.332	323.336	-0.0444558
290.801	322.746	-0.0446225
290.832	323.336	-0.0446784
286.301	322.746	-0.0446787
286.332	323.336	-0.0447332
281.824	322.719	-0.0441204
281.859	323.289	-0.0441714
308.812	326.993	-0.0446545
309.228	327.319	-0.0446602
308.491	327.382	-0.0446063
308.703	328.041	-0.0445712
307.948	327.855	-0.0445531
307.846	327.269	-0.0445838
307.318	327.616	-0.0445578
313.312	326.993	-0.0449268
313.72	327.333	-0.0449556
312.991	327.382	-0.044868
313.193	328.058	-0.0448495
312.449	327.854	-0.0448021
312.346	327.269	-0.0448207
311.819	327.613	-0.0447872
317.812	326.993	-0.0453602
318.228	327.319	-0.0453754
317.491	327.382	-0.0453095
317.703	328.041	-0.0452879
316.949	327.857	-0.0452458
316.846	327.269	-0.0452646
316.318	327.621	-0.0452195
322.312	326.993	-0.0453229
322.723	327.332	-0.0452637
321.991	327.382	-0.0453165
322.194	328.058	-0.0452482
321.45	327.854	-0.0453279
321.346	327.269	-0.0453683
320.819	327.613	-0.0453931
326.335	327.836	-0.0445834
325.794	328.145	-0.0446601
325.785	327.389	-0.0447441
325.257	327.723	-0.0448314
299.82	327.207	-0.0443015
299.872	327.748	-0.0442697
295.32	327.207	-0.0442868
295.363	327.756	-0.0442589
290.82	327.207	-0.0445664
290.863	327.756	-0.0445371
286.32	327.207	-0.0445841
286.363	327.756	-0.0445553
282.103	327.567	-0.0439765
281.761	328.129	-0.0438228
281.692	327.371	-0.0438982
281.214	327.765	-0.043754
282.929	326.818	-0.044222
282.493	327.264	-0.0440924
282.355	326.715	-0.0441009
282.11	327.133	-0.0440203
326.307	318.735	-0.0444909
325.794	319.09	-0.0446376
325.783	318.353	-0.0445295
325.259	318.689	-0.044688
303.839	318.386	-0.0443092
303.507	318.852	-0.0443362
303.33	318.249	-0.044283
302.848	318.575	-0.0443165
282.199	318.648	-0.043909
281.872	319.145	-0.0438961
281.734	318.388	-0.0437645
281.244	318.742	-0.0437184
311.119	330.743	-0.0442926
310.821	330.241	-0.0443734
311.588	330.192	-0.0443977
311.292	329.657	-0.0444942
320.211	330.697	-0.0449671
319.86	330.184	-0.0450734
320.605	330.191	-0.0450247
320.317	329.677	-0.0451436
302.243	330.725	-0.043865
301.861	330.073	-0.0439841
302.558	330.212	-0.0439537
302.366	329.691	-0.0440649
300.768	329.802	-0.0439973
301.132	330.22	-0.0439356
300.482	330.211	-0.0438884
300.827	330.734	-0.043819
297.717	330.757	-0.043763
297.336	330.089	-0.0438983
298.057	330.212	-0.043846
297.797	329.706	-0.0439632
296.252	329.818	-0.0439569
296.606	330.201	-0.0438864
295.998	330.212	-0.043867
296.308	330.738	-0.0437826
293.212	330.658	-0.0439482
293.588	330.187	-0.0439838
287.242	329.797	-0.0443273
287.608	330.167	-0.0442801
286.975	330.199	-0.0442209
287.327	330.683	-0.0441676
284.212	330.664	-0.0438377
284.583	330.193	-0.0439714
326.307	291.736	-0.0442359
325.794	292.09	-0.0443616
325.783	291.353	-0.0443014
325.259	291.689	-0.0444446
303.839	291.386	-0.0446087
303.507	291.852	-0.0446297
303.33	291.249	-0.0446167
302.848	291.575	-0.0446593
282.199	291.648	-0.0446027
281.873	292.144	-0.0445434
281.734	291.389	-0.0444649
281.245	291.742	-0.0443835
303.848	286.898	-0.0442394
303.507	287.354	-0.044336
303.33	286.753	-0.044228
302.85	287.084	-0.0443265
324.657	284.239	-0.0433578
324.931	284.854	-0.0433957
323.649	284.33	-0.0436074
301.975	284.406	-0.0439394
301.707	285.091	-0.0440512
300.951	285.163	-0.0440839
297.706	285.148	-0.0441734
296.92	285.083	-0.0441962
297.707	284.415	-0.0440707
296.625	284.395	-0.044108
288.622	285.14	-0.0446171
287.85	285.09	-0.0445885
287.565	284.415	-0.0444671
280.016	327.96	-0.0435031
280.69	328.247	-0.0435832
280.741	329.016	-0.0434474
280.018	300.96	-0.043562
280.667	301.257	-0.0436625
280.737	302.022	-0.043632
309.859	332.084	-0.0440319
309.548	331.486	-0.0440851
310.443	331.33	-0.044176
309.883	331.031	-0.0441871
310.884	331.982	-0.044108
327.688	329.058	-0.0441214
327.086	329.373	-0.0441577
326.938	328.488	-0.0443697
326.638	329.046	-0.0443227
327.592	328.051	-0.0443243
327.695	302.086	-0.0437515
327.097	302.397	-0.0438332
326.941	301.502	-0.043866
326.642	302.062	-0.0439179
327.593	301.061	-0.0437618
326.862	309.403	-0.0439732
280.691	309.402	-0.0433513
326.907	300.496	-0.0438437
280.692	300.406	-0.0436861
326.878	313.877	-0.0440715
280.677	313.877	-0.0433405
326.907	327.491	-0.0445144
280.682	327.414	-0.0436898
326.83	318.388	-0.0443542
280.726	318.388	-0.0435789
311.449	331.297	-0.0442174
320.557	331.219	-0.0448581
302.547	331.254	-0.0437754
300.488	331.268	-0.0437094
298.141	331.303	-0.0436612
296.012	331.275	-0.0436907
293.496	331.208	-0.0438259
287.033	331.22	-0.0440527
284.495	331.212	-0.0437755
326.829	291.388	-0.0441072
280.726	291.388	-0.0442471
280.024	284.413	-0.042846
327.549	284.396	-0.0426601
296.509	305.615	-0.044234
297.007	305.21	-0.0442443
297.029	305.806	-0.0442395
297.548	305.618	-0.0442406
292.009	305.615	-0.0442926
292.507	305.21	-0.0442893
292.529	305.806	-0.0442778
293.048	305.618	-0.0442622
287.509	305.615	-0.0443814
288.007	305.21	-0.0443945
288.029	305.806	-0.0443832
288.548	305.618	-0.0443774
283.054	305.578	-0.0439626
283.546	305.235	-0.0440538
283.53	305.806	-0.0440397
284.039	305.639	-0.0441138
305.571	306.44	-0.04433
305.253	305.973	-0.0443181
296.529	310.146	-0.0441621
297.019	309.771	-0.0441695
297.033	310.308	-0.0441745
297.545	310.14	-0.0441758
292.029	310.146	-0.044197
292.519	309.771	-0.0441854
292.533	310.308	-0.0441894
293.045	310.14	-0.0441704
287.529	310.146	-0.0442762
288.019	309.771	-0.0442817
288.033	310.308	-0.0442828
288.545	310.14	-0.0442732
283.019	310.129	-0.0438376
283.529	309.76	-0.0439278
283.515	310.317	-0.0439241
284.032	310.145	-0.0439981
305.571	310.94	-0.0443624
305.253	310.473	-0.0443445
296.529	314.646	-0.0441784
297.019	314.271	-0.0441739
297.033	314.808	-0.0441896
297.545	314.64	-0.0441828
292.029	314.646	-0.0442377
292.519	314.271	-0.0442129
292.533	314.808	-0.0442357
293.045	314.64	-0.0442097
287.529	314.646	-0.0442871
288.019	314.271	-0.0442846
288.033	314.808	-0.0443048
288.545	314.64	-0.0442943
283.019	314.633	-0.043844
283.528	314.261	-0.0439178
283.515	314.829	-0.0439354
284.032	314.646	-0.0439996
283.024	296.592	-0.0445255
283.535	296.229	-0.0446451
283.519	296.799	-0.0445908
284.032	296.627	-0.044678
296.509	323.615	-0.0444673
297.007	323.21	-0.0444529
297.029	323.806	-0.0444705
297.548	323.618	-0.0444588
292.009	323.615	-0.0446527
292.507	323.21	-0.0446101
292.529	323.806	-0.0446311
293.048	323.618	-0.0445892
287.509	323.615	-0.0448056
288.007	323.21	-0.0447905
288.029	323.806	-0.0448174
288.548	323.618	-0.0447989
283.021	323.613	-0.0444064
283.532	323.23	-0.0444747
283.539	323.81	-0.0444939
284.048	323.633	-0.0445556
305.571	324.44	-0.044664
305.253	323.973	-0.0446391
315.134	327.678	-0.0451196
315.193	328.245	-0.0450792
314.668	328.023	-0.0450423
314.789	328.453	-0.0450201
324.116	327.707	-0.0450632
324.147	328.277	-0.0449909
323.664	328.032	-0.0451002
323.769	328.467	-0.0450339
296.554	328.171	-0.044219
297.032	327.769	-0.044262
297.071	328.329	-0.0442011
297.563	328.1	-0.0442228
292.06	328.172	-0.0444446
292.537	327.77	-0.0444521
292.575	328.323	-0.0443952
293.068	328.1	-0.0443772
287.557	328.17	-0.0445938
288.035	327.769	-0.0446458
288.077	328.326	-0.0445889
288.569	328.1	-0.0446086
283.048	328.144	-0.0440991
283.549	327.752	-0.0442433
283.572	328.309	-0.0441751
284.068	328.095	-0.0442811
305.571	315.44	-0.044378
305.253	314.973	-0.044361
305.571	328.919	-0.0443485
305.252	328.468	-0.0443939
306.239	287.651	-0.0443356
306.743	288.049	-0.0443679
306.243	288.196	-0.0444091
305.797	288.039	-0.0444019
296.479	300.894	-0.0444007
296.932	301.302	-0.0443808
296.316	301.558	-0.0443736
296.752	301.982	-0.0443488
291.979	300.894	-0.0445279
292.432	301.302	-0.0444914
291.816	301.558	-0.0444911
292.252	301.982	-0.0444494
287.479	300.894	-0.0445909
287.932	301.302	-0.0445796
287.316	301.558	-0.0445488
287.751	301.981	-0.0445336
296.479	296.394	-0.0446632
296.932	296.803	-0.0446244
296.316	297.058	-0.0446257
296.752	297.483	-0.0445801
291.979	296.394	-0.0448754
292.432	296.802	-0.0448245
291.816	297.058	-0.0448276
292.252	297.482	-0.0447703
287.479	296.394	-0.0449834
287.932	296.802	-0.0449528
287.316	297.058	-0.0449109
287.752	297.482	-0.0448753
296.516	318.827	-0.0443029
296.935	319.3	-0.0443245
296.316	319.558	-0.0443378
296.752	319.982	-0.0443491
292.016	318.827	-0.044424
292.435	319.299	-0.0444413
291.816	319.558	-0.044475
292.252	319.982	-0.0444809
287.516	318.827	-0.0445002
287.929	319.314	-0.0445503
287.316	319.558	-0.044556
287.751	319.98	-0.0445961
296.479	291.894	-0.044877
296.932	292.303	-0.0448587
296.316	292.558	-0.0448712
296.752	292.983	-0.0448383
291.979	291.894	-0.0451462
292.432	292.302	-0.0451093
291.816	292.558	-0.0451376
292.252	292.982	-0.0450891
287.479	291.894	-0.0452825
287.932	292.302	-0.0452862
287.316	292.558	-0.0452623
287.751	292.981	-0.045252
301.038	287.521	-0.0444852
301.426	287.968	-0.0445365
300.818	288.083	-0.0445627
301.24	288.54	-0.0445983
296.509	287.365	-0.0445896
296.938	287.828	-0.0446399
296.315	288.057	-0.0446845
296.753	288.484	-0.0447136
291.979	287.457	-0.0448963
292.44	287.831	-0.0449122
291.836	288.052	-0.0449778
292.256	288.494	-0.0449905
287.508	287.366	-0.044968
287.939	287.818	-0.0450536
287.315	288.058	-0.0450521
287.752	288.483	-0.0451219
301.027	301.652	-0.0443327
301.519	301.608	-0.0443371
301.948	301.838	-0.0443211
301.896	302.553	-0.0442972
301.116	305.508	-0.0442771
301.365	305.964	-0.0442799
300.696	306.102	-0.0442583
301.33	306.514	-0.0442651
323.799	297.666	-0.0444931
324.457	297.75	-0.044394
324.616	297.258	-0.044414
301.027	297.152	-0.044481
301.519	297.109	-0.0444788
301.948	297.338	-0.0444464
301.895	298.056	-0.0443963
283.681	300.493	-0.0442838
283.515	300.865	-0.044242
283.2	300.451	-0.0442031
283.012	301.111	-0.0441372
301.153	309.994	-0.0442492
301.38	310.453	-0.0442588
300.71	310.587	-0.04423
301.331	311.013	-0.044249
301.027	292.652	-0.0447231
301.519	292.609	-0.0447175
301.948	292.838	-0.0446855
301.895	293.556	-0.0446358
301.028	319.654	-0.0443609
301.519	319.609	-0.0443761
301.948	319.838	-0.0443838
301.896	320.553	-0.0443953
301.116	323.508	-0.044503
301.365	323.964	-0.0445247
300.696	324.102	-0.0444973
301.33	324.514	-0.0445207
301.153	314.494	-0.044248
301.38	314.953	-0.0442597
300.71	315.087	-0.0442294
301.331	315.513	-0.0442518
283.681	318.493	-0.0441629
283.515	318.865	-0.0441778
283.2	318.451	-0.0440802
283.012	319.113	-0.0441144
301.161	327.977	-0.0443088
301.384	328.447	-0.0442583
300.714	328.583	-0.0442043
301.336	329.003	-0.0441666
323.839	288.674	-0.0444221
324.124	288.245	-0.0443182
324.514	288.617	-0.0442885
324.484	287.986	-0.0442025
283.681	291.493	-0.0449043
283.515	291.865	-0.0448878
283.2	291.452	-0.0448115
283.012	292.111	-0.0447917
325.527	305.247	-0.04417
325.355	306.003	-0.0442353
324.839	305.531	-0.0443225
300.455	305.484	-0.0442603
295.955	305.484	-0.0442232
295.779	301.626	-0.0443701
291.455	305.484	-0.0443014
291.279	301.626	-0.044495
286.955	305.484	-0.0443633
286.775	301.626	-0.0445176
283.024	304.918	-0.043969
300.513	309.908	-0.0442224
295.973	309.961	-0.0441427
291.473	309.961	-0.0441987
286.973	309.961	-0.0442531
282.99	309.487	-0.0438321
282.46	309.935	-0.0437266
305.538	300.418	-0.0442923
305.681	301.042	-0.044308
305.032	300.894	-0.0442906
305.266	301.469	-0.0443049
300.487	300.573	-0.0443336
301.095	300.533	-0.0443391
300.769	301.121	-0.0443403
301.33	301.124	-0.0443414
300.292	301.124	-0.0443364
295.779	297.126	-0.0446329
291.279	297.126	-0.044836
286.779	297.126	-0.0448755
282.443	301.017	-0.0440336
282.465	301.593	-0.044005
281.928	302.02	-0.0438621
300.513	314.408	-0.0442182
295.973	314.461	-0.0441594
291.473	314.461	-0.0442318
286.973	314.461	-0.0442526
282.989	313.987	-0.043815
282.459	314.437	-0.0437287
282.479	310.582	-0.0437222
281.898	310.971	-0.0435864
305.538	295.918	-0.0444297
305.681	296.542	-0.0444167
305.032	296.394	-0.0444133
305.266	296.969	-0.044399
300.487	296.073	-0.0445312
301.095	296.033	-0.0445288
300.769	296.621	-0.0445134
301.33	296.624	-0.0445054
300.292	296.624	-0.0445173
295.779	292.626	-0.0448836
291.279	292.626	-0.0451592
286.774	292.626	-0.0452309
283.015	295.924	-0.0445804
325.527	323.195	-0.0450042
325.387	323.983	-0.0450655
324.87	323.505	-0.0451487
300.455	323.484	-0.0444755
295.955	323.484	-0.0444621
295.78	319.628	-0.0443417
291.455	323.484	-0.044669
291.28	319.628	-0.0444914
286.955	323.484	-0.0447799
286.776	319.626	-0.0445376
282.437	323.481	-0.044294
300.515	327.903	-0.0442856
295.973	327.962	-0.0442398
291.473	327.962	-0.044496
286.973	327.962	-0.0445851
282.991	327.484	-0.0441711
282.458	327.938	-0.0440053
305.538	318.418	-0.0444126
305.681	319.042	-0.0444581
305.032	318.894	-0.0444105
305.266	319.469	-0.0444567
300.514	318.6	-0.0442861
301.113	318.573	-0.0443089
300.771	319.127	-0.0443314
301.333	319.137	-0.0443495
300.296	319.117	-0.0443142
282.443	319.016	-0.044002
282.465	319.596	-0.0440578
281.913	320.024	-0.0439793
282.478	315.089	-0.0437506
281.902	315.522	-0.0436382
282.483	328.594	-0.0439056
281.918	329.033	-0.0436922
305.538	291.418	-0.0446024
305.681	292.042	-0.0446099
305.032	291.894	-0.0446106
305.266	292.469	-0.0446057
324.907	288.16	-0.0441391
325.161	288.628	-0.0441506
300.484	291.574	-0.0447437
301.094	291.534	-0.0447374
300.767	292.121	-0.0447452
301.329	292.124	-0.0447348
300.292	292.124	-0.0447505
300.279	288.153	-0.0445778
295.782	288.132	-0.0447075
291.277	288.141	-0.0450165
286.776	288.127	-0.0450172
282.444	292.015	-0.0446733
282.466	292.594	-0.0446745
281.921	293.006	-0.0445378
305.529	286.854	-0.0442186
305.668	287.487	-0.0443249
305.031	287.367	-0.0443106
305.244	287.94	-0.0443956
306.165	287.074	-0.0442445
306.777	287.387	-0.0442715
306.72	286.703	-0.0441549
301.632	287.448	-0.0444596
301.816	287.001	-0.0443809
302.279	287.398	-0.044416
302.231	286.739	-0.0443083
298.727	305.207	-0.0442253
298.7	305.858	-0.0442267
298.137	305.404	-0.0442351
298.075	306.096	-0.0442258
294.227	305.206	-0.0442151
294.199	305.858	-0.0442098
293.637	305.404	-0.0442394
293.575	306.096	-0.0442243
289.727	305.206	-0.0443317
289.699	305.858	-0.0443246
289.137	305.404	-0.0443584
289.075	306.096	-0.0443421
285.226	305.207	-0.0442382
285.195	305.861	-0.0442262
284.636	305.409	-0.0441849
284.56	306.105	-0.0441579
302.72	305.842	-0.0442681
303.166	306.206	-0.0442619
302.614	306.638	-0.044251
303.288	306.712	-0.0442423
298.729	309.703	-0.0441643
298.702	310.356	-0.0441745
298.14	309.907	-0.0441716
298.076	310.596	-0.0441722
294.23	309.697	-0.0441168
294.202	310.352	-0.0441279
293.641	309.905	-0.0441436
293.576	310.596	-0.0441466
289.73	309.697	-0.0442182
289.702	310.352	-0.0442277
289.141	309.905	-0.0442495
289.076	310.596	-0.0442501
285.228	309.698	-0.0441192
285.198	310.355	-0.0441185
284.635	309.909	-0.0440678
284.559	310.605	-0.0440531
308.487	301.305	-0.0442866
309.18	300.959	-0.0442954
308.648	300.686	-0.0442701
312.987	301.305	-0.0443698
313.68	300.959	-0.0444014
313.148	300.686	-0.0443629
317.487	301.305	-0.0445611
318.18	300.959	-0.044591
317.648	300.686	-0.0445549
321.987	301.305	-0.044551
322.679	300.958	-0.0444973
322.147	300.685	-0.0445211
302.721	310.342	-0.0442622
303.166	310.706	-0.0442667
302.614	311.137	-0.0442542
303.288	311.212	-0.0442556
298.729	314.203	-0.0441578
298.702	314.856	-0.0441759
298.14	314.407	-0.0441705
298.076	315.096	-0.044182
294.23	314.197	-0.0441371
294.202	314.852	-0.0441691
293.641	314.405	-0.0441731
293.576	315.096	-0.0441995
289.73	314.197	-0.0442331
289.702	314.852	-0.0442672
289.141	314.405	-0.0442675
289.076	315.096	-0.0442941
285.228	314.198	-0.0441025
285.198	314.855	-0.0441237
284.635	314.409	-0.0440588
284.56	315.106	-0.0440695
308.487	296.805	-0.0443615
309.18	296.459	-0.0443848
308.648	296.186	-0.0443725
312.987	296.805	-0.0444646
313.68	296.459	-0.0445143
313.148	296.186	-0.0444811
317.487	296.805	-0.0446889
318.18	296.459	-0.0447401
317.648	296.186	-0.0447137
321.987	296.805	-0.044695
322.684	296.475	-0.0446687
322.148	296.187	-0.044713
298.727	323.207	-0.0444171
298.7	323.858	-0.0444459
298.137	323.404	-0.0444392
298.075	324.096	-0.0444544
294.227	323.206	-0.0444834
294.199	323.858	-0.0445095
293.637	323.404	-0.0445363
293.575	324.096	-0.0445533
289.727	323.206	-0.0447125
289.699	323.858	-0.0447517
289.137	323.404	-0.0447612
289.075	324.096	-0.0447886
285.228	323.206	-0.0446431
285.2	323.858	-0.0446691
284.64	323.407	-0.0446078
284.576	324.096	-0.044616
302.72	323.842	-0.0445356
303.166	324.206	-0.0445491
302.614	324.638	-0.044535
303.288	324.712	-0.0445423
298.729	327.7	-0.0442492
298.701	328.346	-0.0441796
298.143	327.89	-0.0442371
298.078	328.556	-0.044155
294.231	327.694	-0.04431
294.202	328.342	-0.0442522
293.656	327.885	-0.0443439
293.583	328.557	-0.0442755
289.73	327.697	-0.0445926
289.702	328.345	-0.0445337
289.155	327.884	-0.0446081
289.085	328.558	-0.0445357
285.231	327.694	-0.044457
285.202	328.342	-0.0443828
284.647	327.89	-0.0443784
284.583	328.558	-0.0442823
308.487	319.305	-0.0445493
309.18	318.959	-0.0445715
308.648	318.686	-0.044515
312.987	319.305	-0.0448031
313.68	318.959	-0.0448356
313.148	318.686	-0.044764
317.487	319.305	-0.0451078
318.18	318.959	-0.0451195
317.648	318.686	-0.045053
321.987	319.305	-0.0451373
322.679	318.958	-0.0450541
322.147	318.685	-0.0450497
302.721	314.842	-0.0442691
303.166	315.206	-0.0442741
302.614	315.637	-0.0442593
303.288	315.712	-0.0442619
302.722	328.331	-0.044298
303.161	328.69	-0.0442565
302.621	329.075	-0.0441792
303.276	329.201	-0.0441668
308.487	292.305	-0.0445294
309.18	291.959	-0.0445347
308.648	291.686	-0.0445221
312.987	292.305	-0.0445982
313.68	291.959	-0.0446406
313.148	291.686	-0.0445899
317.487	292.305	-0.0448821
318.18	291.959	-0.0449236
317.648	291.686	-0.0448832
321.987	292.305	-0.0448823
322.678	291.958	-0.044823
322.147	291.685	-0.0448494
308.459	287.791	-0.044277
309.182	287.448	-0.0442265
308.653	287.183	-0.0441763
312.959	287.791	-0.0443317
313.687	287.454	-0.0443339
313.145	287.178	-0.0442448
317.459	287.791	-0.0446302
318.183	287.454	-0.0446152
317.643	287.178	-0.04454
321.959	287.791	-0.0445293
322.673	287.433	-0.0443851
322.163	287.187	-0.0443949
280.57	305.333	-0.0434715
281.229	305.373	-0.0435935
280.91	306.06	-0.0435113
281.564	305.959	-0.0436469
280.598	296.367	-0.0440614
281.235	296.374	-0.044181
280.931	297.066	-0.0440526
281.548	296.935	-0.0441911
280.598	287.366	-0.0436726
281.259	287.369	-0.0438339
280.939	288.068	-0.0439039
281.573	287.948	-0.0440413
283.05	331.353	-0.0434969
282.997	330.727	-0.0435982
283.677	331.059	-0.0436807
283.516	330.512	-0.043754
292.07	331.326	-0.0439481
292	330.717	-0.0440469
292.681	331.048	-0.0439459
292.517	330.501	-0.044051
306.017	330.352	-0.0441077
306.627	330.702	-0.044066
305.923	331.038	-0.0439821
306.612	331.375	-0.043959
315.083	330.455	-0.0447271
315.621	330.697	-0.0447395
314.906	331.03	-0.0446143
315.578	331.347	-0.0446397
324.083	330.454	-0.044592
324.619	330.697	-0.0444279
323.905	331.03	-0.0445158
324.578	331.347	-0.0443191
326.016	305.932	-0.0441016
326.288	305.353	-0.0440293
326.645	306.06	-0.0439846
326.985	305.333	-0.0439082
326.013	296.905	-0.0441794
326.307	296.324	-0.044157
326.641	297.04	-0.0440593
326.957	296.367	-0.0440494
325.978	287.942	-0.0438423
326.289	287.346	-0.0436343
326.614	288.063	-0.0437219
326.957	287.366	-0.0434938
307.799	301.785	-0.0442829
308.037	302.405	-0.0442578
312.299	301.785	-0.0443457
312.537	302.405	-0.0443211
316.799	301.785	-0.0445296
317.037	302.405	-0.0445082
321.299	301.785	-0.0445925
321.537	302.405	-0.0445623
307.799	297.285	-0.044338
308.037	297.905	-0.0442817
312.299	297.285	-0.0444166
312.537	297.905	-0.044369
316.799	297.285	-0.0446304
317.037	297.905	-0.0445778
321.299	297.285	-0.0446951
321.537	297.905	-0.0446112
307.799	292.785	-0.0445201
308.037	293.405	-0.0444601
312.299	292.785	-0.0445614
312.537	293.405	-0.0445229
316.799	292.785	-0.0448287
317.037	293.405	-0.044786
321.299	292.785	-0.0449169
321.537	293.405	-0.0448596
307.799	319.785	-0.0445374
308.037	320.405	-0.0445424
312.299	319.785	-0.0447811
312.537	320.405	-0.0447969
316.799	319.785	-0.0451009
317.037	320.405	-0.0451288
321.299	319.785	-0.0452177
321.537	320.405	-0.0452386
307.819	288.288	-0.0443471
308.037	288.905	-0.0443801
312.336	288.288	-0.0443603
312.549	288.911	-0.0443999
316.836	288.289	-0.0446554
317.049	288.911	-0.0447027
321.338	288.289	-0.0446557
321.549	288.911	-0.0446864
304.757	303.136	-0.0442394
305.109	303.721	-0.0442502
304.735	304.209	-0.0442406
307.252	304.546	-0.0442844
307.214	304.034	-0.044267
306.932	303.563	-0.0442668
307.305	303.154	-0.044258
307.482	302.566	-0.0442645
308.845	302.676	-0.04427
309.303	302.789	-0.0442855
309.341	303.294	-0.0442799
309.621	303.741	-0.0442964
309.222	304.203	-0.0442905
311.752	304.546	-0.0443415
311.714	304.034	-0.0443197
311.432	303.563	-0.044315
311.805	303.154	-0.044308
311.982	302.566	-0.0443174
313.345	302.676	-0.0443507
313.803	302.789	-0.0443788
313.841	303.294	-0.0443719
314.121	303.741	-0.0443971
313.722	304.203	-0.0443791
316.252	304.546	-0.0445153
316.214	304.034	-0.0444917
315.932	303.563	-0.0444788
316.305	303.154	-0.0444816
316.482	302.566	-0.044495
317.845	302.676	-0.0445448
318.303	302.789	-0.0445735
318.341	303.294	-0.044569
318.621	303.741	-0.0445954
318.222	304.203	-0.0445805
320.752	304.546	-0.0446513
320.714	304.034	-0.0446281
320.432	303.563	-0.0446273
320.805	303.154	-0.0446041
320.982	302.566	-0.0445967
322.345	302.676	-0.0445183
322.803	302.789	-0.0444905
322.84	303.293	-0.0444874
323.116	303.737	-0.0444762
322.712	304.195	-0.044521
325.963	304.76	-0.0440537
325.294	304.54	-0.0441762
325.218	304.034	-0.0441697
324.932	303.563	-0.0442144
325.274	303.172	-0.0441447
325.389	302.641	-0.0441271
325.881	302.582	-0.0440343
326.246	302.277	-0.0439764
326.614	302.558	-0.0439089
304.256	304.633	-0.0442355
303.641	304.989	-0.0442386
303.268	304.638	-0.0442324
302.753	304.485	-0.0442404
302.721	304	-0.0442346
303.34	302.595	-0.044241
303.778	302.218	-0.0442508
304.301	302.685	-0.044238
302.472	303.527	-0.0442458
302.793	303.186	-0.0442418
302.837	302.685	-0.0442552
299.287	305.001	-0.0442169
298.747	304.647	-0.04421
300.329	304.045	-0.044234
300.281	303.274	-0.0442455
300.605	303.658	-0.0442476
299.697	302.664	-0.0442548
300.211	302.789	-0.0442607
298.852	302.628	-0.0442565
299.262	302.326	-0.0442705
298.3	304.146	-0.044216
297.975	303.563	-0.0442381
298.286	303.197	-0.0442433
298.339	302.686	-0.0442675
294.787	305.001	-0.0441972
294.247	304.647	-0.0442053
295.826	304.055	-0.0442169
295.863	303.292	-0.0442435
296.127	303.68	-0.0442375
294.353	302.623	-0.0442879
294.765	302.303	-0.0443051
293.8	304.146	-0.0442296
293.475	303.563	-0.0442709
293.786	303.197	-0.0442743
293.839	302.686	-0.0443093
290.287	305.001	-0.0443071
289.747	304.647	-0.0443233
291.326	304.055	-0.0443122
291.363	303.292	-0.0443457
291.627	303.68	-0.0443289
289.853	302.623	-0.044414
290.265	302.303	-0.0444322
289.3	304.146	-0.0443509
288.975	303.563	-0.0443917
289.286	303.197	-0.0443974
289.339	302.686	-0.0444339
285.787	305.001	-0.0442777
285.247	304.647	-0.0442347
286.826	304.055	-0.0443664
286.863	303.292	-0.044397
287.127	303.68	-0.0443984
285.347	302.618	-0.0443206
285.78	302.298	-0.0443799
284.8	304.146	-0.0442047
284.476	303.576	-0.0441954
284.785	303.203	-0.0442418
284.839	302.686	-0.0442773
281.553	304.786	-0.043655
281.708	302.6	-0.0437695
282.227	302.646	-0.0438754
280.871	302.587	-0.0436111
281.298	302.279	-0.043713
304.757	307.636	-0.0442415
305.109	308.221	-0.04426
304.735	308.709	-0.0442441
307.252	309.046	-0.0443345
307.214	308.534	-0.0443172
306.932	308.063	-0.0443132
307.294	307.674	-0.0443112
307.513	307.172	-0.044318
307.966	307.155	-0.0443215
308.42	306.871	-0.0443333
308.781	307.177	-0.0443365
309.303	307.289	-0.044357
309.341	307.794	-0.0443535
309.621	308.241	-0.0443722
309.222	308.703	-0.0443626
311.752	309.046	-0.0444296
311.714	308.534	-0.044407
311.432	308.063	-0.0444002
311.794	307.674	-0.0443933
312.013	307.172	-0.0443968
312.466	307.155	-0.0444027
312.92	306.871	-0.0444183
313.281	307.177	-0.0444289
313.803	307.289	-0.0444618
313.841	307.794	-0.0444611
314.121	308.241	-0.0444904
313.722	308.703	-0.0444737
316.252	309.046	-0.0446199
316.214	308.534	-0.0445942
315.932	308.063	-0.0445775
316.294	307.674	-0.044579
316.513	307.172	-0.0445859
316.966	307.155	-0.0446016
317.42	306.871	-0.0446239
317.781	307.177	-0.0446395
318.303	307.289	-0.0446757
318.341	307.794	-0.0446764
318.621	308.241	-0.0447061
318.222	308.703	-0.0446907
320.752	309.046	-0.0447651
320.714	308.534	-0.0447443
320.432	308.063	-0.0447446
320.794	307.674	-0.0447236
321.013	307.172	-0.0447128
321.466	307.155	-0.0446897
321.92	306.871	-0.044664
322.281	307.177	-0.0446383
322.803	307.289	-0.0446034
322.841	307.794	-0.0446004
323.121	308.241	-0.0445857
322.722	308.703	-0.0446295
325.217	309.055	-0.0442806
325.214	308.534	-0.0442605
324.932	308.063	-0.044309
325.294	307.669	-0.0442324
325.442	307.148	-0.0442074
325.866	307.071	-0.0441204
326.217	306.656	-0.0440574
326.805	306.893	-0.0439424
304.256	309.133	-0.0442335
303.641	309.489	-0.0442314
303.268	309.138	-0.0442159
302.753	308.985	-0.0442165
302.724	308.501	-0.0442059
303.414	307.17	-0.0442206
303.821	306.896	-0.044233
304.305	307.227	-0.0442327
302.485	308.032	-0.0442106
302.814	307.683	-0.0442097
302.948	307.198	-0.0442218
299.288	309.483	-0.0441585
298.747	309.147	-0.0441421
300.309	307.666	-0.0441856
299.709	307.138	-0.0441812
300.21	307.201	-0.0441986
298.866	307.131	-0.044169
299.288	306.844	-0.0441861
298.3	308.646	-0.0441367
297.978	308.071	-0.0441467
298.299	307.699	-0.0441526
298.373	307.179	-0.0441719
294.789	309.467	-0.0440966
294.247	309.147	-0.044094
295.81	307.662	-0.0441193
295.205	307.144	-0.044127
295.697	307.196	-0.0441382
294.366	307.131	-0.0441309
294.788	306.844	-0.0441426
293.8	308.646	-0.0441033
293.478	308.071	-0.0441277
293.799	307.699	-0.044125
293.873	307.179	-0.0441472
290.289	309.467	-0.0441884
289.747	309.147	-0.0441968
291.31	307.662	-0.0441895
290.705	307.144	-0.0442171
291.197	307.196	-0.0442141
289.866	307.131	-0.0442385
290.288	306.844	-0.0442439
289.3	308.646	-0.0442129
288.978	308.071	-0.0442406
289.299	307.699	-0.0442374
289.373	307.179	-0.0442607
285.789	309.468	-0.044156
285.247	309.147	-0.0441075
286.81	307.662	-0.0442487
286.205	307.144	-0.0442315
286.697	307.196	-0.0442652
285.366	307.131	-0.0441685
285.788	306.844	-0.0442185
284.8	308.646	-0.0440698
284.48	308.074	-0.0440528
284.798	307.7	-0.0440965
284.873	307.179	-0.0441278
281.747	307.084	-0.0436106
282.266	307.14	-0.0437202
280.751	306.893	-0.0434241
281.354	306.672	-0.0435569
304.757	298.636	-0.0442711
305.114	299.22	-0.0442627
304.752	299.708	-0.0442484
308.787	300.124	-0.0442467
308.161	300.467	-0.044251
307.782	300.17	-0.0442426
307.252	300.046	-0.0442524
307.214	299.534	-0.044245
306.932	299.063	-0.0442598
307.305	298.654	-0.0442592
307.482	298.066	-0.0442861
308.845	298.176	-0.044281
309.303	298.289	-0.0442934
309.345	298.786	-0.0442693
309.619	299.25	-0.0442722
309.234	299.702	-0.0442528
313.287	300.124	-0.0443476
312.661	300.467	-0.0443322
312.282	300.17	-0.0443157
311.752	300.046	-0.0443125
311.714	299.534	-0.0443055
311.432	299.063	-0.044313
311.805	298.654	-0.0443233
311.982	298.066	-0.0443554
313.345	298.176	-0.0443938
313.803	298.289	-0.0444206
313.845	298.786	-0.0443949
314.119	299.25	-0.0444036
313.734	299.702	-0.0443694
317.787	300.124	-0.0445404
317.161	300.467	-0.0445231
316.782	300.17	-0.0445046
316.252	300.046	-0.044495
316.214	299.534	-0.044491
315.932	299.063	-0.0444969
316.305	298.654	-0.0445171
316.482	298.066	-0.044557
317.845	298.176	-0.0445995
318.303	298.289	-0.0446206
318.345	298.786	-0.0445898
318.619	299.25	-0.0445904
318.234	299.702	-0.0445603
322.287	300.124	-0.0444888
321.661	300.467	-0.0445369
321.282	300.17	-0.0445503
320.752	300.046	-0.0445819
320.714	299.534	-0.0445803
320.432	299.063	-0.0446071
320.805	298.654	-0.0446038
320.982	298.066	-0.0446363
322.345	298.176	-0.0445483
322.803	298.289	-0.0445159
322.845	298.786	-0.0444773
323.12	299.247	-0.0444416
322.733	299.701	-0.0444581
325.239	300.04	-0.0441369
325.214	299.534	-0.044141
324.932	299.063	-0.0442077
325.274	298.672	-0.0441628
325.388	298.14	-0.0441819
325.868	298.073	-0.0440952
326.22	297.65	-0.0440712
326.808	297.889	-0.0439462
304.309	300.147	-0.0442468
302.752	300.046	-0.0442783
302.723	299.5	-0.0442784
303.34	298.095	-0.0443105
[truncated: 4,673 more rows]

## Sheet: Figure-12-a-b
300.289	308.936	-0.0460968		非均匀荷载-1
300.838	308.878	-0.0462094
300.407	309.377	-0.04612
301.011	309.448	-0.0462311
295.789	308.936	-0.0448788
296.324	308.918	-0.0450956
295.907	309.376	-0.044925
296.449	309.53	-0.0451305
291.289	308.936	-0.0428328
291.824	308.918	-0.0431307
291.407	309.376	-0.0428974
291.949	309.53	-0.043187
286.789	308.936	-0.0402499
287.324	308.918	-0.0406071
286.907	309.376	-0.0403284
287.449	309.53	-0.0406794
300.289	313.436	-0.0454905
300.838	313.378	-0.0456112
300.407	313.877	-0.0454287
301.011	313.948	-0.0455224
295.789	313.436	-0.0443193
296.324	313.418	-0.044529
295.907	313.876	-0.0442916
296.449	314.03	-0.04446
291.289	313.436	-0.0423594
291.824	313.418	-0.0426484
291.407	313.876	-0.0423657
291.949	314.03	-0.0426221
286.789	313.436	-0.0398459
287.324	313.418	-0.040198
286.907	313.876	-0.0398785
287.449	314.03	-0.0402055
282.289	322.438	-0.0344466
282.824	322.418	-0.034841
282.408	322.876	-0.0343578
282.947	323.035	-0.0346749
300.289	326.936	-0.0391653
300.838	326.878	-0.039276
300.407	327.377	-0.0389066
301.013	327.444	-0.0389394
295.789	326.936	-0.038419
296.324	326.918	-0.0385621
295.907	327.376	-0.0381798
296.455	327.533	-0.0382088
291.289	326.936	-0.0370824
291.824	326.918	-0.0373058
291.407	327.376	-0.0368687
291.961	327.538	-0.0369818
286.789	326.936	-0.0349739
287.324	326.918	-0.0352952
286.907	327.376	-0.034786
287.456	327.533	-0.0350019
282.774	302.723	-0.0373856
283.21	303.128	-0.0377345
282.503	303.191	-0.0371944
282.758	303.709	-0.0374288
300.728	307.947	-0.0461902
301.296	308.242	-0.0462919
300.503	308.473	-0.0461353
296.228	307.947	-0.0450654
296.768	308.337	-0.0452675
296.003	308.473	-0.044961
291.728	307.947	-0.0430873
292.268	308.337	-0.0433766
291.503	308.473	-0.0429468
287.228	307.947	-0.0405535
287.768	308.337	-0.0409025
287.003	308.473	-0.0403874
282.803	307.214	-0.0375987
283.231	307.609	-0.0379002
282.503	307.691	-0.0373336
282.761	308.212	-0.0375184
300.728	312.447	-0.0457665
301.296	312.742	-0.0458142
300.503	312.973	-0.0456147
296.228	312.447	-0.0446557
296.768	312.837	-0.0447895
296.003	312.973	-0.0444716
291.728	312.447	-0.042729
292.268	312.837	-0.0429609
291.503	312.973	-0.0425271
287.228	312.447	-0.0402422
287.768	312.837	-0.0405471
287.003	312.973	-0.0400269
282.789	311.707	-0.0373648
283.229	312.108	-0.0376407
282.503	312.191	-0.037072
282.761	312.712	-0.037212
282.774	293.722	-0.0350809
283.21	294.128	-0.0355673
282.503	294.191	-0.0350455
282.758	294.709	-0.0354469
282.728	321.447	-0.0351452
283.262	321.842	-0.0353824
282.503	321.973	-0.0347718
300.728	325.947	-0.0398395
301.296	326.242	-0.0397289
300.503	326.473	-0.0394764
296.228	325.947	-0.0391283
296.768	326.337	-0.0390195
296.003	326.473	-0.0387472
291.728	325.947	-0.0378389
292.268	326.337	-0.037818
291.503	326.473	-0.0374344
287.228	325.947	-0.0357987
287.768	326.337	-0.0358823
287.003	326.473	-0.0353595
282.808	325.223	-0.033458
283.232	325.61	-0.0335349
282.503	325.691	-0.0329475
282.761	326.212	-0.032841
288.744	330.689	-0.0335391
288.343	330.051	-0.0337837
289.031	330.172	-0.0340042
288.795	329.688	-0.0342452
295.341	301.966	-0.0442264
296.004	302.161	-0.0445013
295.372	302.535	-0.0443088
295.911	302.815	-0.0445576
290.841	301.966	-0.0422708
291.504	302.161	-0.0426367
290.872	302.535	-0.0423331
291.411	302.815	-0.0426496
286.329	301.965	-0.0397196
287	302.153	-0.0401701
286.372	302.535	-0.0397802
286.911	302.815	-0.040157
295.341	297.466	-0.0429125
296.004	297.661	-0.0431814
295.372	298.035	-0.0430974
295.906	298.32	-0.0433661
290.841	297.466	-0.0412307
291.504	297.661	-0.0415939
290.872	298.035	-0.0413826
291.406	298.32	-0.0417144
286.341	297.466	-0.0388226
287.004	297.661	-0.0392872
286.372	298.035	-0.0389628
286.906	298.32	-0.0393687
282.728	298.947	-0.0367133
283.293	299.349	-0.0372325
282.505	299.522	-0.0366623
282.919	299.983	-0.0370927
295.341	292.966	-0.0409222
296.004	293.161	-0.0411818
295.372	293.535	-0.0411855
295.906	293.82	-0.0414592
290.841	292.966	-0.03946
291.504	293.161	-0.039828
290.872	293.535	-0.0397092
291.406	293.82	-0.0400635
286.329	292.965	-0.0371426
286.999	293.154	-0.0376382
286.372	293.535	-0.0373985
286.906	293.82	-0.0378488
295.341	319.966	-0.0420632
296.004	320.161	-0.0421748
295.372	320.535	-0.0417808
295.911	320.815	-0.0418162
290.841	319.966	-0.0404132
291.504	320.161	-0.0406326
290.872	320.535	-0.0401683
291.411	320.815	-0.0402966
286.33	319.965	-0.038067
287	320.153	-0.0384061
286.372	320.535	-0.0378548
286.911	320.815	-0.0380787
300.7	316.942	-0.0444676
301.296	317.242	-0.0444508
300.49	317.526	-0.0441994
300.85	317.974	-0.044098
296.228	316.947	-0.0434921
296.779	317.323	-0.0435438
295.997	317.515	-0.0432103
296.373	317.95	-0.0431976
291.728	316.947	-0.0417759
292.279	317.323	-0.0419364
291.497	317.515	-0.0414959
291.873	317.95	-0.0415677
287.228	316.947	-0.0394471
287.779	317.323	-0.0397005
286.997	317.515	-0.0391589
287.373	317.95	-0.0393029
282.728	316.947	-0.0364982
283.293	317.349	-0.0368315
282.505	317.522	-0.0361989
282.919	317.983	-0.0364182
299.819	288.482	-0.0389563
300.502	288.675	-0.0391334
299.844	289.059	-0.0393073
300.405	289.323	-0.0395203
295.341	288.466	-0.0383008
296.003	288.661	-0.0385729
295.372	289.035	-0.0386481
295.906	289.32	-0.0389474
290.819	288.48	-0.0369138
291.506	288.667	-0.03731
290.845	289.057	-0.0372655
291.406	289.321	-0.0376566
286.33	288.465	-0.0346033
286.999	288.654	-0.0351351
286.372	289.035	-0.0349704
286.906	289.32	-0.0354741
282.728	289.947	-0.0330418
283.287	290.354	-0.0337162
282.505	290.522	-0.0332026
282.919	290.983	-0.0338098
308.395	301.883	-0.0451883
309.03	301.691	-0.0450191
308.625	302.227	-0.0452219
309.232	302.305	-0.0451343
312.895	301.883	-0.0439273
313.53	301.691	-0.0436458
313.125	302.227	-0.0439101
313.732	302.305	-0.0437048
317.395	301.883	-0.0419367
318.03	301.691	-0.0415838
317.625	302.227	-0.0418786
318.232	302.305	-0.0415986
321.895	301.883	-0.0393957
322.53	301.691	-0.0389646
322.125	302.227	-0.0393011
322.73	302.306	-0.0389425
300.849	304.184	-0.0459377
300.882	304.877	-0.0460599
300.352	304.52	-0.0459018
300.275	304.99	-0.045975
296.328	304.215	-0.0449165
296.349	304.913	-0.0450218
295.828	304.522	-0.0447635
295.753	305	-0.0448102
296.539	302.593	-0.0447577
296.36	303.185	-0.0447833
291.828	304.215	-0.0430237
291.849	304.913	-0.0431116
291.328	304.522	-0.0427833
291.253	305	-0.0428049
292.039	302.593	-0.0429605
291.86	303.185	-0.0429319
287.328	304.215	-0.0405483
287.349	304.913	-0.0406236
286.828	304.522	-0.0402432
286.753	305	-0.0402463
287.539	302.593	-0.040552
287.36	303.185	-0.0404852
282.588	304.683	-0.0373961
282.471	305.296	-0.0373513
282.104	304.75	-0.0370322
281.834	305.335	-0.0368875
283.414	303.851	-0.0379377
300.734	307.396	-0.0462072
301.318	307.669	-0.0463016
296.256	307.337	-0.0451001
296.806	307.588	-0.0452961
291.756	307.337	-0.0431307
292.306	307.588	-0.0434154
287.256	307.337	-0.0406022
287.806	307.588	-0.0409475
283.415	308.353	-0.0380157
308.395	297.383	-0.0435201
309.03	297.191	-0.0433313
308.625	297.727	-0.0436182
309.232	297.805	-0.0435543
312.895	297.383	-0.0424219
313.53	297.191	-0.0421466
313.125	297.727	-0.0424702
313.732	297.805	-0.0423097
317.395	297.383	-0.0406626
318.03	297.191	-0.0403077
317.625	297.727	-0.0406603
318.232	297.805	-0.0404114
321.895	297.383	-0.0382461
322.53	297.191	-0.0377988
322.125	297.727	-0.0382016
322.721	297.811	-0.0378681
296.539	298.093	-0.0434857
296.353	298.698	-0.0436353
292.039	298.093	-0.0419574
291.853	298.698	-0.0420315
287.539	298.093	-0.03972
287.353	298.698	-0.0397413
282.764	298.325	-0.0366209
283.31	298.579	-0.0370812
300.734	311.896	-0.0458853
301.318	312.169	-0.0459324
296.256	311.837	-0.0447864
296.806	312.087	-0.0449402
291.756	311.837	-0.042848
292.306	312.087	-0.0430962
287.256	311.837	-0.0403507
287.806	312.087	-0.0406678
283.415	312.852	-0.0376927
308.395	292.883	-0.041281
309.03	292.691	-0.0410855
308.625	293.227	-0.0414214
309.232	293.305	-0.0413789
312.895	292.883	-0.040339
313.53	292.691	-0.0400674
313.125	293.227	-0.040441
313.732	293.305	-0.0403174
317.395	292.883	-0.0387657
318.03	292.691	-0.0383991
317.625	293.227	-0.0388231
318.232	293.305	-0.0386017
321.895	292.883	-0.0364301
322.53	292.691	-0.0359522
322.125	293.227	-0.0364454
322.73	293.306	-0.0361188
296.539	293.593	-0.0415144
296.353	294.198	-0.041752
292.039	293.593	-0.0402362
291.853	294.198	-0.0404177
287.539	293.593	-0.0381474
287.353	294.198	-0.0382802
282.59	295.682	-0.0357158
282.483	296.299	-0.0358619
282.107	295.747	-0.0353692
281.826	296.313	-0.0353836
283.413	294.851	-0.0360012
308.395	319.883	-0.0432303
309.03	319.691	-0.0432497
308.625	320.227	-0.043018
309.232	320.305	-0.0429214
312.895	319.883	-0.0423308
313.53	319.691	-0.0422372
313.125	320.227	-0.0421004
313.732	320.305	-0.0419103
317.395	319.883	-0.0407034
318.03	319.691	-0.0404964
317.625	320.227	-0.0404565
318.232	320.305	-0.0401705
321.895	319.883	-0.0383263
322.53	319.691	-0.0380053
322.125	320.227	-0.038052
322.73	320.306	-0.037664
300.849	322.184	-0.0420578
300.882	322.877	-0.0417043
300.352	322.52	-0.0418111
300.275	322.99	-0.0415653
296.328	322.215	-0.0412645
296.349	322.913	-0.0409285
295.828	322.522	-0.0409753
295.753	323	-0.0407301
296.539	320.593	-0.0421193
296.36	321.185	-0.0417762
291.828	322.215	-0.0398717
291.849	322.913	-0.0395674
291.328	322.522	-0.0395213
291.253	323	-0.0392842
292.039	320.593	-0.0406796
291.86	321.185	-0.040341
287.328	322.215	-0.0377682
287.349	322.913	-0.0374875
286.828	322.522	-0.0373411
286.753	323	-0.0371036
287.539	320.593	-0.0385545
287.36	321.185	-0.0382093
282.752	320.859	-0.035405
283.282	321.111	-0.0356877
300.734	325.396	-0.0401977
301.318	325.669	-0.0400963
296.256	325.337	-0.0395207
296.806	325.588	-0.0394947
291.756	325.337	-0.0382222
292.306	325.588	-0.0382824
287.256	325.337	-0.0361788
287.806	325.588	-0.0363424
283.416	326.353	-0.0332364
281.437	324.711	-0.0327678
281.054	324.167	-0.0328138
281.829	324	-0.0334316
281.346	323.612	-0.0332938
282.091	324.649	-0.0332676
300.746	316.388	-0.0447017
301.318	316.669	-0.0446818
296.256	316.34	-0.0437253
296.807	316.587	-0.0438169
291.756	316.34	-0.0419765
292.307	316.587	-0.0421679
287.256	316.34	-0.0396256
287.807	316.587	-0.0399014
282.756	316.329	-0.0366729
283.308	316.581	-0.0370188
288.021	330.661	-0.0332166
308.396	288.368	-0.0385455
309.027	288.193	-0.0383463
308.625	288.727	-0.0387393
309.229	288.812	-0.038717
312.9	288.368	-0.0376761
313.535	288.192	-0.0373984
313.125	288.727	-0.0378399
313.731	288.81	-0.0377394
317.399	288.368	-0.0361661
318.028	288.193	-0.0357853
317.625	288.727	-0.0362913
318.228	288.811	-0.0360897
321.9	288.368	-0.0338312
322.528	288.193	-0.0333303
322.125	288.727	-0.033918
322.726	288.811	-0.0336051
301.039	289.093	-0.0394299
300.849	289.702	-0.0397893
296.539	289.093	-0.0389527
296.353	289.698	-0.0392787
292.039	289.093	-0.0377757
291.853	289.698	-0.0380625
287.539	289.093	-0.0357263
287.353	289.698	-0.0359752
282.754	289.35	-0.0327198
283.29	289.607	-0.0332769
324.137	285.933	-0.0307145
323.474	285.597	-0.03093
324.361	285.354	-0.0301644
324.026	284.9	-0.0301028
301.085	284.45	-0.0363534
300.356	284.679	-0.0364487
299.622	284.373	-0.036203
289.958	284.373	-0.0338149
289.202	284.667	-0.0336569
288.46	284.449	-0.0331575
280.054	328.843	-0.029438
280.283	329.578	-0.0290881
280.016	330.291	-0.028454
280.046	301.856	-0.0353946
280.28	302.593	-0.0356181
279.984	303.323	-0.0354815
324.454	296.801	-0.0364207
324.14	297.22	-0.0367761
323.859	296.698	-0.0367868
323.645	297.178	-0.0370949
305.756	305.992	-0.0463649
305.638	305.525	-0.0463104
306.183	305.741	-0.0462986
306.134	305.151	-0.0462155
310.307	305.869	-0.045579
310.178	305.408	-0.0455439
310.705	305.667	-0.0454319
310.673	305.091	-0.0453516
314.807	305.869	-0.0438838
314.678	305.408	-0.0438784
315.205	305.667	-0.0436693
315.173	305.091	-0.0436024
319.307	305.869	-0.0415663
319.178	305.408	-0.0415828
319.705	305.667	-0.0413085
319.673	305.091	-0.0412549
305.756	310.493	-0.0463713
305.637	310.025	-0.0464084
306.183	310.241	-0.0463605
306.134	309.652	-0.0463942
310.307	310.369	-0.0456572
310.178	309.908	-0.0457087
310.705	310.167	-0.0455513
310.673	309.591	-0.0455785
314.807	310.369	-0.0439869
314.678	309.908	-0.0440566
315.205	310.167	-0.0438059
315.173	309.591	-0.0438308
319.307	310.369	-0.0416713
319.178	309.908	-0.0417509
319.705	310.167	-0.0414395
319.673	309.591	-0.0414626
323.79	310.39	-0.0388084
323.68	309.969	-0.0388871
324.191	310.201	-0.0385242
324.127	309.66	-0.038572
305.756	314.993	-0.045467
305.637	314.525	-0.0456001
306.183	314.741	-0.0455137
306.134	314.152	-0.0456692
310.307	314.869	-0.0448684
310.178	314.408	-0.0450081
310.705	314.667	-0.0448139
310.673	314.091	-0.044953
314.807	314.869	-0.0433485
314.678	314.408	-0.0434917
315.205	314.667	-0.0432146
315.173	314.091	-0.0433336
319.307	314.869	-0.0411615
319.178	314.408	-0.0413032
319.705	314.667	-0.0409659
319.673	314.091	-0.0410676
323.79	314.89	-0.0383599
323.681	314.469	-0.0384898
324.193	314.702	-0.038102
324.128	314.161	-0.0382148
305.756	323.992	-0.0413077
305.638	323.525	-0.0415686
306.183	323.741	-0.0414376
306.134	323.151	-0.0417605
310.307	323.869	-0.0410083
310.178	323.408	-0.0412676
310.705	323.667	-0.041048
310.673	323.091	-0.0413495
314.807	323.869	-0.0399776
314.678	323.408	-0.0402423
315.205	323.667	-0.0399474
315.173	323.091	-0.0402339
319.307	323.869	-0.0381774
319.178	323.408	-0.0384545
319.705	323.667	-0.0380681
319.673	323.091	-0.0383462
305.749	328.487	-0.0384688
305.639	328.019	-0.0387778
306.177	328.243	-0.0386251
306.135	327.647	-0.0390164
310.311	328.362	-0.0382571
310.179	327.906	-0.0385666
310.703	328.162	-0.0383279
310.659	327.607	-0.0386897
319.311	328.362	-0.0355709
319.179	327.906	-0.0359205
319.704	328.161	-0.0354983
319.659	327.607	-0.0358674
283.774	302.011	-0.0380431
283.64	301.358	-0.0378699
284.409	301.495	-0.0384129
283.996	300.884	-0.038045
283.133	301.784	-0.037562
283.253	302.426	-0.0377141
283.817	302.705	-0.0381378
296.66	306.254	-0.045245
297.411	306.326	-0.045479
296.782	306.894	-0.0452961
297.389	307.143	-0.0454826
292.16	306.254	-0.0433554
292.911	306.326	-0.0437208
292.282	306.894	-0.0434181
292.889	307.143	-0.0437094
287.66	306.254	-0.0408813
288.411	306.326	-0.0413316
287.782	306.894	-0.0409515
288.389	307.143	-0.0413102
283.17	306.217	-0.0378913
283.861	306.351	-0.0383808
283.299	306.878	-0.0379748
283.864	307.156	-0.0383704
283.161	297.239	-0.0366528
283.86	297.354	-0.0371782
283.278	297.882	-0.036901
283.865	298.15	-0.0373803
296.671	310.76	-0.0451082
297.412	310.826	-0.0453309
296.783	311.394	-0.045053
297.389	311.643	-0.045198
292.171	310.76	-0.0432136
292.912	310.826	-0.0435646
292.283	311.394	-0.0431887
292.889	311.643	-0.0434434
287.671	310.76	-0.0407435
288.412	310.826	-0.0411799
287.783	311.394	-0.0407425
288.389	311.643	-0.0410725
283.141	310.738	-0.0377272
283.859	310.851	-0.0382269
283.29	311.377	-0.0377708
283.863	311.656	-0.0381472
283.774	293.011	-0.0354996
283.64	292.358	-0.0350952
284.409	292.495	-0.0356894
283.995	291.884	-0.035101
283.133	292.783	-0.0349355
283.254	293.426	-0.0353118
283.817	293.704	-0.0358315
283.771	320.017	-0.0364343
283.638	319.362	-0.0365634
284.409	319.495	-0.0370303
283.995	318.885	-0.0369481
283.128	319.796	-0.0360667
283.237	320.449	-0.0359103
283.823	320.703	-0.0362175
296.66	324.254	-0.0402767
297.411	324.326	-0.0403845
296.782	324.894	-0.0399188
297.389	325.143	-0.0398833
292.16	324.254	-0.0390074
292.911	324.326	-0.0392242
292.282	324.894	-0.0386857
292.889	325.143	-0.0387427
287.66	324.254	-0.0370151
288.411	324.326	-0.0373655
287.782	324.894	-0.0367288
288.389	325.143	-0.0368987
283.168	324.244	-0.0342511
283.913	324.323	-0.0347138
283.287	324.875	-0.0339924
283.89	325.114	-0.0342674
296.671	315.26	-0.0442215
297.412	315.326	-0.0444126
296.782	315.899	-0.0440503
297.388	316.149	-0.0441315
292.171	315.26	-0.0424759
292.912	315.326	-0.0427916
292.282	315.899	-0.0423571
292.888	316.149	-0.0425509
287.671	315.26	-0.0401324
288.412	315.326	-0.0405446
287.782	315.899	-0.0400557
288.388	316.149	-0.0403403
283.139	315.249	-0.0371827
283.859	315.355	-0.0376663
283.266	315.887	-0.0371438
283.866	316.153	-0.0375061
283.772	288.509	-0.0329488
283.638	287.837	-0.0324125
284.382	288.017	-0.0330471
284.001	287.345	-0.0323331
283.149	288.278	-0.0323487
283.249	288.934	-0.0328393
283.827	289.196	-0.0334187
324.348	306.268	-0.0383575
324.84	306.146	-0.0379906
324.572	306.748	-0.0382064
325.14	306.655	-0.0377879
324.391	324.278	-0.0349239
324.897	324.133	-0.0346379
324.615	324.799	-0.0344797
325.163	324.649	-0.0341697
314.644	328.774	-0.0370812
314.785	329.188	-0.0367508
314.193	329.007	-0.0370295
314.306	329.535	-0.0366321
323.625	328.779	-0.0327952
323.765	329.2	-0.0324113
323.181	328.989	-0.0329278
323.289	329.536	-0.032483
310.834	287.553	-0.0376372
310.71	287.097	-0.0373421
311.306	287.33	-0.037373
311.241	286.721	-0.0369616
315.355	287.568	-0.0364514
315.209	287.081	-0.0361631
315.81	287.35	-0.036129
315.74	286.755	-0.0357399
319.869	287.575	-0.0344968
319.715	287.038	-0.0342051
320.409	287.33	-0.0340182
320.266	286.78	-0.0337145
302.416	302.265	-0.0457101
302.439	301.586	-0.0455437
303.06	302.016	-0.0456513
302.998	301.241	-0.0454412
301.407	302.14	-0.0456308
301.334	302.866	-0.0457701
300.727	302.337	-0.0455862
300.749	303.101	-0.0457319
307.338	305.757	-0.0461385
307.968	306.031	-0.0460598
307.273	306.545	-0.0462144
307.95	306.68	-0.0461041
311.837	305.751	-0.0450445
312.467	306.03	-0.0448349
311.767	306.533	-0.045136
312.45	306.68	-0.0448836
316.337	305.751	-0.0431015
316.967	306.03	-0.0428001
316.267	306.533	-0.0431968
316.95	306.68	-0.042846
320.836	305.75	-0.0406088
321.467	306.03	-0.0402294
320.767	306.533	-0.0407028
321.45	306.68	-0.0402712
302.416	297.765	-0.0441388
302.439	297.086	-0.0438478
303.06	297.516	-0.0440215
302.998	296.741	-0.0436753
301.407	297.643	-0.0440635
301.333	298.378	-0.0443506
300.727	297.841	-0.0440802
300.751	298.615	-0.0443799
307.338	310.257	-0.0462108
307.968	310.531	-0.0460842
307.273	311.045	-0.0461284
307.95	311.18	-0.0459985
311.837	310.251	-0.0451556
312.467	310.53	-0.0448993
311.767	311.033	-0.045103
312.45	311.18	-0.0448301
316.337	310.251	-0.0432262
316.967	310.53	-0.0428832
316.267	311.033	-0.0432007
316.95	311.18	-0.0428308
320.837	310.251	-0.0407241
321.467	310.53	-0.0403068
320.767	311.033	-0.0407179
321.45	311.18	-0.0402664
302.416	293.265	-0.0419291
302.439	292.586	-0.0415646
303.06	293.016	-0.0417768
302.998	292.241	-0.0413489
301.407	293.143	-0.041859
301.333	293.878	-0.0422283
300.727	293.341	-0.0419156
300.751	294.115	-0.0423021
302.416	320.265	-0.0431966
302.439	319.59	-0.0435422
303.06	320.016	-0.0433395
302.997	319.244	-0.0437248
301.407	320.14	-0.0431953
301.334	320.866	-0.0428065
300.727	320.337	-0.0430027
300.749	321.101	-0.042603
307.338	323.757	-0.0413498
307.968	324.031	-0.0411371
307.273	324.545	-0.0408876
307.95	324.68	-0.0407442
311.837	323.751	-0.0407653
312.467	324.03	-0.0404675
311.767	324.533	-0.0403366
312.45	324.68	-0.0400927
316.337	323.751	-0.039483
316.967	324.03	-0.0390887
316.267	324.533	-0.0390891
316.95	324.68	-0.038735
320.836	323.75	-0.0373922
321.467	324.03	-0.0368826
320.767	324.533	-0.0370251
321.45	324.68	-0.0365422
307.338	314.757	-0.0453786
307.968	315.031	-0.0452065
307.273	315.545	-0.0451307
307.95	315.68	-0.0449856
311.837	314.751	-0.0444374
312.467	315.03	-0.0441499
311.767	315.533	-0.044233
312.45	315.68	-0.0439583
316.337	314.751	-0.0426576
316.967	315.03	-0.0422902
316.267	315.533	-0.0425063
316.95	315.68	-0.0421368
320.837	314.751	-0.0402591
321.467	315.03	-0.0398143
320.767	315.533	-0.0401463
321.45	315.68	-0.0396867
307.334	328.269	-0.038547
307.965	328.542	-0.0383153
307.255	329.079	-0.0379844
307.949	329.2	-0.0378481
311.835	328.242	-0.0380594
312.461	328.529	-0.0377325
311.758	328.996	-0.0375542
312.45	329.18	-0.0372755
316.33	328.278	-0.0368403
316.964	328.544	-0.0364202
316.248	329.085	-0.0363192
316.947	329.198	-0.0359707
320.836	328.242	-0.0348176
321.462	328.529	-0.0342619
320.762	328.999	-0.0343461
321.45	329.18	-0.0338172
293.03	330.202	-0.0355403
292.624	329.898	-0.0356271
293.214	329.747	-0.0359021
292.788	329.319	-0.036078
284.022	330.218	-0.0311836
283.62	329.897	-0.0311365
284.18	329.788	-0.0315693
283.78	329.322	-0.0316295
302.391	288.776	-0.0392422
302.462	288.088	-0.0387962
303.06	288.517	-0.0390511
302.991	287.745	-0.0385429
308.812	304.493	-0.0456513
309.228	304.82	-0.0456373
308.491	304.882	-0.0457778
308.703	305.541	-0.0458637
307.949	305.352	-0.045969
307.846	304.769	-0.0458657
307.318	305.115	-0.0460411
313.312	304.493	-0.0442662
313.728	304.82	-0.0441636
312.991	304.882	-0.0444529
313.203	305.541	-0.0444893
312.449	305.351	-0.0447499
312.346	304.769	-0.0446711
311.819	305.114	-0.0449523
317.812	304.493	-0.0421497
318.228	304.82	-0.0419924
317.491	304.882	-0.0423689
317.703	305.541	-0.0423662
316.949	305.351	-0.042727
316.846	304.769	-0.0426733
316.319	305.114	-0.0430211
322.312	304.493	-0.0395056
322.694	304.793	-0.0393075
321.991	304.882	-0.0397562
322.192	305.535	-0.0397203
321.447	305.35	-0.0401703
321.346	304.769	-0.0401396
320.819	305.114	-0.0405411
299.825	304.761	-0.0458328
299.832	305.336	-0.0459379
295.301	304.746	-0.0445794
295.332	305.336	-0.0446812
290.801	304.746	-0.042518
290.832	305.336	-0.0426073
286.301	304.746	-0.0399124
286.332	305.336	-0.0399937
282.951	304.298	-0.0376331
282.376	304.213	-0.037179
308.812	308.993	-0.045984
309.228	309.32	-0.04591
308.491	309.382	-0.0460346
308.703	310.041	-0.0459927
307.949	309.852	-0.0461286
307.846	309.269	-0.0461397
307.318	309.615	-0.046241
313.312	308.993	-0.0446003
313.728	309.32	-0.0444416
312.991	309.382	-0.0447223
313.203	310.041	-0.0446439
312.449	309.851	-0.0449362
312.346	309.269	-0.0449614
311.819	309.614	-0.0451794
317.812	308.993	-0.0424534
318.228	309.32	-0.0422476
317.491	309.382	-0.0426203
317.703	310.041	-0.0425212
316.949	309.851	-0.0429118
316.846	309.269	-0.0429453
316.319	309.614	-0.043243
322.312	308.993	-0.039766
322.728	309.32	-0.0395068
321.991	309.382	-0.0399732
322.203	310.041	-0.0398481
321.449	309.851	-0.0403322
321.346	309.269	-0.0403768
320.819	309.614	-0.0407383
326.306	309.714	-0.0369859
325.792	310.094	-0.0373547
325.776	309.36	-0.0373442
325.277	309.701	-0.0377275
299.82	309.207	-0.0459855
299.872	309.748	-0.0459956
295.32	309.207	-0.0446744
295.363	309.756	-0.0446912
290.82	309.207	-0.0425643
290.863	309.756	-0.0425891
286.32	309.207	-0.0399293
286.363	309.756	-0.0399601
282.11	309.588	-0.037032
281.759	310.115	-0.0367568
281.701	309.377	-0.0367225
281.215	309.7	-0.0363793
282.93	308.818	-0.037648
282.498	309.27	-0.0373222
282.356	308.716	-0.0372025
282.11	309.133	-0.0370306
326.347	300.835	-0.0361729
325.85	301.126	-0.0365893
325.8	300.374	-0.0364211
325.282	300.697	-0.0368862
303.839	300.386	-0.0451212
303.507	300.852	-0.0453027
303.33	300.249	-0.0450681
302.848	300.575	-0.0452137
282.198	300.65	-0.0366999
281.869	301.152	-0.0365485
281.734	300.388	-0.0362876
281.224	300.767	-0.0360113
308.812	313.493	-0.0454381
309.228	313.82	-0.0453065
308.491	313.882	-0.0454055
308.703	314.541	-0.0452317
307.949	314.352	-0.0453922
307.846	313.769	-0.0455228
307.318	314.115	-0.0455422
313.312	313.493	-0.0441563
313.728	313.82	-0.0439512
312.991	313.882	-0.0442016
313.203	314.541	-0.0440094
312.449	314.351	-0.0443132
312.346	313.769	-0.0444445
311.819	314.114	-0.044582
317.812	313.493	-0.0421114
318.228	313.82	-0.0418661
317.491	313.882	-0.0422156
317.703	314.541	-0.0420225
316.949	314.351	-0.0424231
316.846	313.769	-0.0425441
316.319	314.114	-0.0427745
322.312	313.493	-0.0394795
322.728	313.82	-0.039183
321.991	313.882	-0.0396361
322.203	314.541	-0.0394288
321.449	314.351	-0.0399288
321.346	313.769	-0.0400483
320.819	314.114	-0.0403579
326.352	314.239	-0.0366029
325.809	314.618	-0.036943
325.786	313.871	-0.0370255
325.271	314.209	-0.0373779
299.82	313.707	-0.045332
299.872	314.248	-0.0452378
295.32	313.707	-0.0440816
295.363	314.256	-0.0440088
290.82	313.707	-0.0420674
290.863	314.256	-0.0420225
286.32	313.707	-0.0395044
286.363	314.256	-0.0394792
282.109	314.09	-0.0366097
281.754	314.626	-0.0362847
281.701	313.878	-0.0363241
281.193	314.243	-0.0359359
282.93	313.318	-0.0372884
282.498	313.771	-0.036926
282.356	313.216	-0.0368565
282.11	313.633	-0.0366503
303.839	295.886	-0.0432083
303.507	296.352	-0.0434652
303.33	295.749	-0.0431427
302.848	296.075	-0.0433442
282.949	295.3	-0.0358347
282.376	295.212	-0.0353521
308.812	322.493	-0.0418663
309.228	322.82	-0.0416653
308.491	322.882	-0.0416988
308.703	323.541	-0.0413447
307.949	323.352	-0.0415135
307.846	322.769	-0.0418127
307.318	323.115	-0.0416969
313.312	322.493	-0.0410194
313.728	322.82	-0.0407677
312.991	322.882	-0.0409144
313.203	323.541	-0.0405511
312.449	323.351	-0.0408251
312.346	322.769	-0.0411192
311.819	323.114	-0.0410925
317.812	322.493	-0.0394464
318.228	322.82	-0.0391345
317.491	322.882	-0.03941
317.703	323.541	-0.0390318
316.949	323.351	-0.0394277
316.846	322.769	-0.0397178
316.319	323.114	-0.0397911
322.312	322.493	-0.0370614
322.694	322.793	-0.0367088
321.991	322.882	-0.0370895
322.192	323.535	-0.0366888
321.447	323.35	-0.037216
321.346	322.769	-0.0375132
320.819	323.114	-0.0376908
299.825	322.761	-0.0416039
299.832	323.336	-0.0413148
295.301	322.746	-0.0407153
295.332	323.336	-0.0404444
290.801	322.746	-0.0391921
290.832	323.336	-0.0389479
286.301	322.746	-0.036928
286.332	323.336	-0.0367017
281.824	322.719	-0.0340006
281.859	323.289	-0.0337926
308.812	326.993	-0.0392522
309.228	327.319	-0.0390189
308.491	327.382	-0.0390316
308.703	328.041	-0.0385995
307.948	327.855	-0.0387754
307.846	327.269	-0.0391466
307.318	327.616	-0.0389754
313.312	326.993	-0.0385199
313.72	327.333	-0.038223
312.991	327.382	-0.0383515
313.193	328.058	-0.0378868
312.449	327.854	-0.0381791
312.346	327.269	-0.0385571
311.819	327.613	-0.0384671
317.812	326.993	-0.0370538
318.228	327.319	-0.0366914
317.491	327.382	-0.0369469
317.703	328.041	-0.0364592
316.949	327.857	-0.0368719
316.846	327.269	-0.0372622
316.318	327.621	-0.0372603
322.312	326.993	-0.0347125
322.723	327.332	-0.0342647
321.991	327.382	-0.0346705
322.194	328.058	-0.0341361
321.45	327.854	-0.0347052
321.346	327.269	-0.0351126
320.819	327.613	-0.0352224
326.335	327.836	-0.0315087
325.794	328.145	-0.0316918
325.785	327.389	-0.0321459
325.257	327.723	-0.0323282
299.82	327.207	-0.0389251
299.872	327.748	-0.038594
295.32	327.207	-0.0381299
295.363	327.756	-0.0378044
290.82	327.207	-0.0367255
290.863	327.756	-0.0364149
286.32	327.207	-0.0345344
286.363	327.756	-0.0342356
282.103	327.567	-0.0316087
281.761	328.129	-0.0310227
281.692	327.371	-0.0314281
281.214	327.765	-0.030874
282.929	326.818	-0.0326262
282.493	327.264	-0.0320603
282.355	326.715	-0.0322616
282.11	327.133	-0.031863
326.307	318.735	-0.035712
325.794	319.09	-0.0359778
325.783	318.353	-0.0361555
325.259	318.689	-0.0364599
303.839	318.386	-0.0441161
303.507	318.852	-0.0439133
303.33	318.249	-0.0441528
302.848	318.575	-0.0440158
282.199	318.648	-0.0357432
281.872	319.145	-0.0353751
281.734	318.388	-0.035457
281.244	318.742	-0.0350394
311.119	330.743	-0.0364694
310.821	330.241	-0.0368695
311.588	330.192	-0.0367369
311.292	329.657	-0.0371842
320.211	330.697	-0.03349
319.86	330.184	-0.034036
320.605	330.191	-0.0335943
320.317	329.677	-0.0341292
302.243	330.725	-0.0367599
301.861	330.073	-0.0371935
302.558	330.212	-0.0371117
302.366	329.691	-0.0374875
300.768	329.802	-0.0372812
301.132	330.22	-0.0370319
300.482	330.211	-0.0369375
300.827	330.734	-0.0366361
297.717	330.757	-0.0362186
297.336	330.089	-0.0366234
298.057	330.212	-0.0366246
297.797	329.706	-0.036962
296.252	329.818	-0.0365997
296.606	330.201	-0.036412
295.998	330.212	-0.0362462
296.308	330.738	-0.0359737
293.212	330.658	-0.0352742
293.588	330.187	-0.0356786
287.242	329.797	-0.0333743
287.608	330.167	-0.0333265
286.975	330.199	-0.0329251
287.327	330.683	-0.0328144
284.212	330.664	-0.031002
284.583	330.193	-0.0315315
326.307	291.736	-0.0328741
325.794	292.09	-0.0334378
325.783	291.353	-0.0330022
325.259	291.689	-0.0335888
303.839	291.386	-0.0407874
303.507	291.852	-0.0410941
303.33	291.249	-0.0407116
302.848	291.575	-0.0409508
282.199	291.648	-0.0336534
281.873	292.144	-0.0336818
281.734	291.389	-0.0331363
281.245	291.742	-0.0329931
303.848	286.898	-0.037901
303.507	287.354	-0.0382446
303.33	286.753	-0.0378112
302.85	287.084	-0.038085
324.657	284.239	-0.029234
324.931	284.854	-0.0294199
323.649	284.33	-0.0299941
301.975	284.406	-0.0363388
301.707	285.091	-0.0367705
300.951	285.163	-0.0367951
297.706	285.148	-0.0365093
296.92	285.083	-0.0363548
297.707	284.415	-0.0360523
296.625	284.395	-0.0358722
288.622	285.14	-0.0336783
287.85	285.09	-0.0332307
287.565	284.415	-0.0326374
280.016	327.96	-0.0299788
280.69	328.247	-0.0302326
280.741	329.016	-0.0297618
280.018	300.96	-0.0352436
280.667	301.257	-0.0357254
280.737	302.022	-0.0358728
309.859	332.084	-0.035805
309.548	331.486	-0.0362031
310.443	331.33	-0.0362077
309.883	331.031	-0.0364688
310.884	331.982	-0.0357312
327.688	329.058	-0.0298447
327.086	329.373	-0.030009
326.938	328.488	-0.0307003
326.638	329.046	-0.0305283
327.592	328.051	-0.0305578
327.695	302.086	-0.0355577
327.097	302.397	-0.035982
326.941	301.502	-0.035936
326.642	302.062	-0.0362334
327.593	301.061	-0.0354265
326.862	309.403	-0.0366024
280.691	309.402	-0.0360238
326.907	300.496	-0.0357187
280.692	300.406	-0.035573
326.878	313.877	-0.0362868
280.677	313.877	-0.035627
326.907	327.491	-0.0313371
280.682	327.414	-0.0307311
326.83	318.388	-0.0354455
280.726	318.388	-0.034775
311.449	331.297	-0.0360459
320.557	331.219	-0.0329534
302.547	331.254	-0.0364197
300.488	331.268	-0.03624
298.141	331.303	-0.0359159
296.012	331.275	-0.0355508
293.496	331.208	-0.0349863
287.033	331.22	-0.0322958
284.495	331.212	-0.03082
326.829	291.388	-0.0323194
280.726	291.388	-0.0324231
280.024	284.413	-0.027452
327.549	284.396	-0.0273369
296.509	305.615	-0.0451568
297.007	305.21	-0.0452792
297.029	305.806	-0.0453435
297.548	305.618	-0.0454753
292.009	305.615	-0.0432549
292.507	305.21	-0.0434722
292.529	305.806	-0.0435258
293.048	305.618	-0.0437564
287.509	305.615	-0.0407725
288.007	305.21	-0.0410546
288.029	305.806	-0.0411001
288.548	305.618	-0.0413939
283.054	305.578	-0.0377956
283.546	305.235	-0.0381341
283.53	305.806	-0.0381475
284.039	305.639	-0.0384954
305.571	306.44	-0.0464082
305.253	305.973	-0.0463784
296.529	310.146	-0.0451246
297.019	309.771	-0.0453142
297.033	310.308	-0.0452812
297.545	310.14	-0.045444
292.029	310.146	-0.0431987
292.519	309.771	-0.043467
292.533	310.308	-0.0434407
293.045	310.14	-0.043693
287.529	310.146	-0.0407048
288.019	309.771	-0.0410252
288.033	310.308	-0.0410056
288.545	310.14	-0.041314
283.019	310.129	-0.0376822
283.529	309.76	-0.0380668
283.515	310.317	-0.0380311
284.032	310.145	-0.0384011
305.571	310.94	-0.0463229
305.253	310.473	-0.0463821
296.529	314.646	-0.0443479
297.019	314.271	-0.044591
297.033	314.808	-0.0444642
297.545	314.64	-0.0446456
292.029	314.646	-0.0425493
292.519	314.271	-0.0428548
292.533	314.808	-0.0427538
293.045	314.64	-0.0430143
287.529	314.646	-0.0401639
288.019	314.271	-0.0405158
288.033	314.808	-0.0404371
288.545	314.64	-0.0407538
283.019	314.633	-0.0372007
283.528	314.261	-0.0376161
283.515	314.829	-0.0375259
284.032	314.646	-0.037909
283.024	296.592	-0.036361
283.535	296.229	-0.0366071
283.519	296.799	-0.0367835
284.032	296.627	-0.0370842
296.509	323.615	-0.0406039
297.007	323.21	-0.0409301
297.029	323.806	-0.0406144
297.548	323.618	-0.0408157
292.009	323.615	-0.0392919
292.507	323.21	-0.0396754
292.529	323.806	-0.0393836
293.048	323.618	-0.0396518
287.509	323.615	-0.0372582
288.007	323.21	-0.0377172
288.029	323.806	-0.0374451
288.548	323.618	-0.0377977
283.021	323.613	-0.0344647
283.532	323.23	-0.0349945
283.539	323.81	-0.034729
284.048	323.633	-0.0351516
305.571	324.44	-0.0410403
305.253	323.973	-0.0413119
315.134	327.678	-0.0376419
315.193	328.245	-0.0372645
314.668	328.023	-0.0375641
314.789	328.453	-0.0372567
324.116	327.707	-0.0331438
324.147	328.277	-0.0327695
323.664	328.032	-0.0332477
323.769	328.467	-0.0329075
296.554	328.171	-0.0378134
297.032	327.769	-0.038175
297.071	328.329	-0.0378125
297.563	328.1	-0.038048
292.06	328.172	-0.0366126
292.537	327.77	-0.0370365
292.575	328.323	-0.0366917
293.068	328.1	-0.036989
287.557	328.17	-0.034656
288.035	327.769	-0.0351643
288.077	328.326	-0.0348292
288.569	328.1	-0.035216
283.048	328.144	-0.0319126
283.549	327.752	-0.032501
283.572	328.309	-0.0321663
284.068	328.095	-0.0326279
305.571	315.44	-0.0453232
305.253	314.973	-0.0454767
305.571	328.919	-0.0381644
305.252	328.468	-0.0384683
306.239	287.651	-0.038335
306.743	288.049	-0.0385491
306.243	288.196	-0.0387052
305.797	288.039	-0.0386367
296.479	300.894	-0.0443769
296.932	301.302	-0.0446165
296.316	301.558	-0.0444924
296.752	301.982	-0.0447163
291.979	300.894	-0.0426552
292.432	301.302	-0.0429499
291.816	301.558	-0.0427075
292.252	301.982	-0.0429834
287.479	300.894	-0.0402965
287.932	301.302	-0.0406357
287.316	301.558	-0.0403031
287.751	301.981	-0.0406206
296.479	296.394	-0.0428076
296.932	296.803	-0.0430898
296.316	297.058	-0.0430454
296.752	297.483	-0.0433199
291.979	296.394	-0.0413817
292.432	296.802	-0.0417147
291.816	297.058	-0.0415502
292.252	297.482	-0.0418695
287.479	296.394	-0.0392008
287.932	296.802	-0.0395949
287.316	297.058	-0.039317
287.752	297.482	-0.0396914
296.516	318.827	-0.0429139
296.935	319.3	-0.0428266
296.316	319.558	-0.0425477
296.752	319.982	-0.0424705
292.016	318.827	-0.041365
292.435	319.299	-0.0413703
291.816	319.558	-0.0410153
292.252	319.982	-0.0410277
287.516	318.827	-0.03916
287.929	319.314	-0.0392425
287.316	319.558	-0.038812
287.751	319.98	-0.038911
296.479	291.894	-0.0406191
296.932	292.303	-0.0409344
296.316	292.558	-0.0409506
296.752	292.983	-0.0412591
291.979	291.894	-0.0393851
292.432	292.302	-0.0397661
291.816	292.558	-0.03967
292.252	292.982	-0.040039
287.479	291.894	-0.0373125
287.932	292.302	-0.0377775
287.316	292.558	-0.0375562
287.751	292.981	-0.0380025
301.038	287.521	-0.0384068
301.426	287.968	-0.0387243
300.818	288.083	-0.038775
301.24	288.54	-0.039091
296.509	287.365	-0.0378251
296.938	287.828	-0.038215
296.315	288.057	-0.0382529
296.753	288.484	-0.0386118
291.979	287.457	-0.0367062
292.44	287.831	-0.0371199
291.836	288.052	-0.0370501
292.256	288.494	-0.0374844
287.508	287.366	-0.034589
287.939	287.818	-0.0351395
287.315	288.058	-0.0349436
287.752	288.483	-0.0354697
301.027	301.652	-0.0454746
301.519	301.608	-0.0455156
301.948	301.838	-0.0455983
301.896	302.553	-0.0457545
301.116	305.508	-0.0461833
301.365	305.964	-0.0462619
300.696	306.102	-0.046171
301.33	306.514	-0.0462877
323.799	297.666	-0.0371396
324.457	297.75	-0.0367118
324.616	297.258	-0.0364613
301.027	297.152	-0.0438284
301.519	297.109	-0.0438458
301.948	297.338	-0.0439584
301.895	298.056	-0.0442518
283.681	300.493	-0.0377607
283.515	300.865	-0.0377097
283.2	300.451	-0.0374038
283.012	301.111	-0.0373817
301.153	309.994	-0.0462264
301.38	310.453	-0.0462181
300.71	310.587	-0.0460928
301.331	311.013	-0.0461364
301.027	292.652	-0.0415792
301.519	292.609	-0.0415809
301.948	292.838	-0.0417099
301.895	293.556	-0.0420827
301.028	319.654	-0.0433967
301.519	319.609	-0.0434775
301.948	319.838	-0.0433956
301.896	320.553	-0.0430206
301.116	323.508	-0.0413925
301.365	323.964	-0.0411586
300.696	324.102	-0.0409971
301.33	324.514	-0.0408224
301.153	314.494	-0.0454096
301.38	314.953	-0.0453087
300.71	315.087	-0.0451624
301.331	315.513	-0.0451154
283.681	318.493	-0.0368456
283.515	318.865	-0.0366305
283.2	318.451	-0.0365158
283.012	319.113	-0.0362009
301.161	327.977	-0.038606
301.384	328.447	-0.0383096
300.714	328.583	-0.0381369
301.336	329.003	-0.0379128
323.839	288.674	-0.0327995
324.124	288.245	-0.0323354
324.514	288.617	-0.0322927
324.484	287.986	-0.031911
283.681	291.493	-0.0346723
283.515	291.865	-0.034756
283.2	291.452	-0.0342967
283.012	292.111	-0.034514
325.527	305.247	-0.0374042
325.355	306.003	-0.0376047
324.839	305.531	-0.0379389
300.455	305.484	-0.0460759
295.955	305.484	-0.0449428
295.779	301.626	-0.044327
291.455	305.484	-0.042956
291.279	301.626	-0.0424527
286.955	305.484	-0.0404121
286.775	301.626	-0.0399731
283.024	304.918	-0.0377373
300.513	309.908	-0.0461203
295.973	309.961	-0.0449286
291.473	309.961	-0.0429147
286.973	309.961	-0.0403563
282.99	309.487	-0.0376835
282.46	309.935	-0.0372789
305.538	300.418	-0.0451124
305.681	301.042	-0.0453294
305.032	300.894	-0.0453036
305.266	301.469	-0.0454876
300.487	300.573	-0.0450694
301.095	300.533	-0.0451343
300.769	301.121	-0.0452933
301.33	301.124	-0.0453562
300.292	301.124	-0.0452272
295.779	297.126	-0.0429244
291.279	297.126	-0.0413359
286.779	297.126	-0.0390106
282.443	301.017	-0.0369511
282.465	301.593	-0.0370498
281.928	302.02	-0.0367016
300.513	314.408	-0.0453252
295.973	314.461	-0.0441969
291.473	314.461	-0.0423057
286.973	314.461	-0.0398448
282.989	313.987	-0.0372633
282.459	314.437	-0.0368215
282.479	310.582	-0.0372531
281.898	310.971	-0.0367891
305.538	295.918	-0.043191
305.681	296.542	-0.0435003
305.032	296.394	-0.043455
305.266	296.969	-0.0437295
300.487	296.073	-0.0432618
301.095	296.033	-0.043301
300.769	296.621	-0.0435635
301.33	296.624	-0.0436092
300.292	296.624	-0.0435147
295.779	292.626	-0.0408648
291.279	292.626	-0.0394893
286.774	292.626	-0.0372663
283.015	295.924	-0.0361231
325.527	323.195	-0.0346255
325.387	323.983	-0.0343625
324.87	323.505	-0.0349578
300.455	323.484	-0.0413235
295.955	323.484	-0.0405361
295.78	319.628	-0.0423601
291.455	323.484	-0.0391383
291.28	319.628	-0.0407535
286.955	323.484	-0.0370045
286.776	319.626	-0.0384678
282.437	323.481	-0.0341136
300.515	327.903	-0.0385784
295.973	327.962	-0.0378213
291.473	327.962	-0.0365289
286.973	327.962	-0.0344629
282.991	327.484	-0.0322798
282.458	327.938	-0.0316305
305.538	318.418	-0.0441442
305.681	319.042	-0.0438732
305.032	318.894	-0.043938
305.266	319.469	-0.0436784
300.514	318.6	-0.0437952
301.113	318.573	-0.0438948
300.771	319.127	-0.0436103
301.333	319.137	-0.0436775
300.296	319.117	-0.043543
282.443	319.016	-0.0358246
282.465	319.596	-0.03566
281.913	320.024	-0.0351153
282.478	315.089	-0.0367318
281.902	315.522	-0.0362289
282.483	328.594	-0.031225
281.918	329.033	-0.0305331
305.538	291.418	-0.0407672
305.681	292.042	-0.0411405
305.032	291.894	-0.0410798
305.266	292.469	-0.0414129
324.907	288.16	-0.0317234
325.161	288.628	-0.0318373
300.484	291.574	-0.0409091
301.094	291.534	-0.0409302
300.767	292.121	-0.0412628
301.329	292.124	-0.0412962
300.292	292.124	-0.0412266
300.279	288.153	-0.0387869
295.782	288.132	-0.0381917
291.277	288.141	-0.0368916
286.776	288.127	-0.0346665
282.444	292.015	-0.0340428
282.466	292.594	-0.0343508
281.921	293.006	-0.0341377
305.529	286.854	-0.0378299
305.668	287.487	-0.0382667
305.031	287.367	-0.0382104
305.244	287.94	-0.0386
306.165	287.074	-0.0379403
306.777	287.387	-0.0380918
306.72	286.703	-0.0376183
301.632	287.448	-0.0383763
301.816	287.001	-0.0380675
302.279	287.398	-0.038331
302.231	286.739	-0.0378724
298.727	305.207	-0.0456961
298.7	305.858	-0.0457641
298.137	305.404	-0.0455973
298.075	306.096	-0.0456403
294.227	305.206	-0.0442203
294.199	305.858	-0.0442657
293.637	305.404	-0.0439967
293.575	306.096	-0.0440118
289.727	305.206	-0.0420061
289.699	305.858	-0.0420337
289.137	305.404	-0.041708
289.075	306.096	-0.041703
285.226	305.207	-0.039262
285.195	305.861	-0.0392747
284.636	305.409	-0.0388883
284.56	306.105	-0.0388583
302.72	305.842	-0.0463387
303.166	306.206	-0.046382
302.614	306.638	-0.0463841
303.288	306.712	-0.0464023
298.729	309.703	-0.0457523
298.702	310.356	-0.0457052
298.14	309.907	-0.0456116
298.076	310.596	-0.0455347
294.23	309.697	-0.0442277
294.202	310.352	-0.0441778
293.641	309.905	-0.0439707
293.576	310.596	-0.0438873
289.73	309.697	-0.0419813
289.702	310.352	-0.0419342
289.141	309.905	-0.0416582
289.076	310.596	-0.0415754
285.228	309.698	-0.0392181
285.198	310.355	-0.0391686
284.635	309.909	-0.0388212
284.559	310.605	-0.0387271
308.487	301.305	-0.0450048
309.18	300.959	-0.0447622
308.648	300.686	-0.0447578
312.987	301.305	-0.0437424
313.68	300.959	-0.0433844
313.148	300.686	-0.0434872
317.487	301.305	-0.0417641
318.18	300.959	-0.0413368
317.648	300.686	-0.0415175
321.987	301.305	-0.039226
322.679	300.958	-0.0387159
322.147	300.685	-0.0389762
302.721	310.342	-0.0463342
303.166	310.706	-0.046312
302.614	311.137	-0.0462232
303.288	311.212	-0.0462338
298.729	314.203	-0.0450153
298.702	314.856	-0.0448462
298.14	314.407	-0.0448448
298.076	315.096	-0.0446428
294.23	314.197	-0.0435823
294.202	314.852	-0.0434326
293.641	314.405	-0.0433092
293.576	315.096	-0.043125
289.73	314.197	-0.0414474
289.702	314.852	-0.0413227
289.141	314.405	-0.0411122
289.076	315.096	-0.0409505
285.228	314.198	-0.0387569
285.198	314.855	-0.0386424
284.635	314.409	-0.0383459
284.56	315.106	-0.0381835
308.487	296.805	-0.0432434
309.18	296.459	-0.0429639
308.648	296.186	-0.0429068
312.987	296.805	-0.0421563
313.68	296.459	-0.0417913
313.148	296.186	-0.0418232
317.487	296.805	-0.0404154
318.18	296.459	-0.0399674
317.648	296.186	-0.0400912
321.987	296.805	-0.0379992
322.684	296.475	-0.0374533
322.148	296.187	-0.0376651
298.727	323.207	-0.0412195
298.7	323.858	-0.0408598
298.137	323.404	-0.0410288
298.075	324.096	-0.0406298
294.227	323.206	-0.0402029
294.199	323.858	-0.0398592
293.637	323.404	-0.0399388
293.575	324.096	-0.0395535
289.727	323.206	-0.0385312
289.699	323.858	-0.0382035
289.137	323.404	-0.0381775
289.075	324.096	-0.037802
285.228	323.206	-0.0360906
285.2	323.858	-0.0357678
284.64	323.407	-0.0356365
284.576	324.096	-0.0352603
302.72	323.842	-0.0413067
303.166	324.206	-0.0411064
302.614	324.638	-0.0408194
303.288	324.712	-0.04079
298.729	327.7	-0.0384727
298.701	328.346	-0.038039
298.143	327.89	-0.0382717
298.078	328.556	-0.0378122
294.231	327.694	-0.0375604
294.202	328.342	-0.0371306
293.656	327.885	-0.0372908
293.583	328.557	-0.0368256
289.73	327.697	-0.0359849
289.702	328.345	-0.0355569
289.155	327.884	-0.035621
289.085	328.558	-0.0351489
285.231	327.694	-0.0336013
285.202	328.342	-0.0331713
284.647	327.89	-0.0331232
284.583	328.558	-0.0326507
308.487	319.305	-0.0434964
309.18	318.959	-0.0435599
308.648	318.686	-0.0437388
312.987	319.305	-0.0425517
313.68	318.959	-0.0424809
313.148	318.686	-0.0427339
317.487	319.305	-0.0408748
318.18	318.959	-0.0406741
317.648	318.686	-0.0409943
321.987	319.305	-0.0384634
322.679	318.958	-0.0381386
322.147	318.685	-0.0385382
302.721	314.842	-0.045444
303.166	315.206	-0.0453474
302.614	315.637	-0.0451703
303.288	315.712	-0.0451649
302.722	328.331	-0.0384642
303.161	328.69	-0.0382312
302.621	329.075	-0.0379356
303.276	329.201	-0.0378623
308.487	292.305	-0.0409451
309.18	291.959	-0.0406444
308.648	291.686	-0.0405474
312.987	292.305	-0.0400061
313.68	291.959	-0.0396252
313.148	291.686	-0.0396025
317.487	292.305	-0.0384332
318.18	291.959	-0.0379485
317.648	291.686	-0.0380179
321.987	292.305	-0.0360855
322.678	291.958	-0.0354782
322.147	291.685	-0.0356454
308.459	287.791	-0.0381503
309.182	287.448	-0.037819
308.653	287.183	-0.0376956
312.959	287.791	-0.0372782
313.687	287.454	-0.0368606
313.145	287.178	-0.0368008
317.459	287.791	-0.0357602
318.183	287.454	-0.0352206
317.643	287.178	-0.0352536
321.959	287.791	-0.0334089
322.673	287.433	-0.0327212
322.163	287.187	-0.0328572
280.57	305.333	-0.0360082
281.229	305.373	-0.0364595
280.91	306.06	-0.0362585
281.564	305.959	-0.036717
280.598	296.367	-0.0345432
281.235	296.374	-0.0349826
280.931	297.066	-0.0349923
281.548	296.935	-0.0353887
280.598	287.366	-0.0298487
281.259	287.369	-0.0303175
280.939	288.068	-0.0305733
281.573	287.948	-0.0309536
283.05	331.353	-0.0297988
282.997	330.727	-0.0301567
283.677	331.059	-0.0304077
283.516	330.512	-0.0306566
292.07	331.326	-0.034487
292	330.717	-0.0348546
292.681	331.048	-0.0348713
292.517	330.501	-0.0351814
306.017	330.352	-0.0371519
306.627	330.702	-0.0368944
305.923	331.038	-0.0366891
306.612	331.375	-0.0364581
315.083	330.455	-0.0357887
315.621	330.697	-0.0354485
314.906	331.03	-0.0354619
315.578	331.347	-0.0350477
324.083	330.454	-0.0313413
324.619	330.697	-0.0308062
323.905	331.03	-0.0310821
324.578	331.347	-0.0304211
326.016	305.932	-0.0371274
326.288	305.353	-0.036884
326.645	306.06	-0.0367013
326.985	305.333	-0.0364172
326.013	296.905	-0.0353613
326.307	296.324	-0.0349475
326.641	297.04	-0.0349823
326.957	296.367	-0.0345391
325.978	287.942	-0.0308046
326.289	287.346	-0.0301673
326.614	288.063	-0.0304449
326.957	287.366	-0.029732
307.799	301.785	-0.0452651
308.037	302.405	-0.0453566
312.299	301.785	-0.044117
312.537	302.405	-0.0441517
316.799	301.785	-0.042209
317.037	302.405	-0.0421896
321.299	301.785	-0.039746
321.537	302.405	-0.0396818
307.799	297.285	-0.0435718
308.037	297.905	-0.0437771
312.299	297.285	-0.0425667
312.537	297.905	-0.042712
316.799	297.285	-0.0408968
317.037	297.905	-0.040973
321.299	297.285	-0.0385729
321.537	297.905	-0.0385959
307.799	292.785	-0.0413108
308.037	293.405	-0.0415877
312.299	292.785	-0.0404458
312.537	293.405	-0.0406771
316.799	292.785	-0.038966
317.037	293.405	-0.0391429
321.299	292.785	-0.0367363
321.537	293.405	-0.0368647
307.799	319.785	-0.043345
308.037	320.405	-0.0429813
312.299	319.785	-0.0425361
312.537	320.405	-0.0421641
316.799	319.785	-0.040998
317.037	320.405	-0.0406246
321.299	319.785	-0.0387182
321.537	320.405	-0.0383264
307.819	288.288	-0.0385649
308.037	288.905	-0.0389189
312.336	288.288	-0.0377614
312.549	288.911	-0.038089
316.836	288.289	-0.0363432
317.049	288.911	-0.0366324
321.338	288.289	-0.0341134
321.549	288.911	-0.0343674
304.757	303.136	-0.0458682
305.109	303.721	-0.0459818
304.735	304.209	-0.046076
307.252	304.546	-0.0459336
307.214	304.034	-0.0458343
306.932	303.563	-0.0457902
307.305	303.154	-0.0456434
307.482	302.566	-0.0454949
308.845	302.676	-0.0452764
309.303	302.789	-0.0452182
309.341	303.294	-0.0453085
309.621	303.741	-0.0453435
309.222	304.203	-0.0455113
311.752	304.546	-0.0448598
311.714	304.034	-0.0447706
311.432	303.563	-0.0447849
311.805	303.154	-0.0445682
311.982	302.566	-0.0443927
313.345	302.676	-0.0439142
313.803	302.789	-0.0437651
313.841	303.294	-0.0438385
314.121	303.741	-0.0438124
313.722	304.203	-0.044049
316.252	304.546	-0.0429488
316.214	304.034	-0.042876
315.932	303.563	-0.0429437
316.305	303.154	-0.0426826
316.482	302.566	-0.0425001
317.845	302.676	-0.0418415
318.303	302.789	-0.0416363
318.341	303.294	-0.0416916
318.621	303.741	-0.0416202
318.222	304.203	-0.0418934
320.752	304.546	-0.0404879
320.714	304.034	-0.0404306
320.432	303.563	-0.040541
320.805	303.154	-0.0402459
320.982	302.566	-0.0400561
322.345	302.676	-0.0392279
322.803	302.789	-0.0389624
322.84	303.293	-0.0390053
323.116	303.737	-0.0388922
322.712	304.195	-0.0392104
325.963	304.76	-0.0370251
325.294	304.54	-0.0374711
325.218	304.034	-0.0374534
324.932	303.563	-0.0375999
325.274	303.172	-0.037303
325.389	302.641	-0.0371589
325.881	302.582	-0.0368069
326.246	302.277	-0.0365229
326.614	302.558	-0.0363164
304.256	304.633	-0.0461537
303.641	304.989	-0.046217
303.268	304.638	-0.0461522
302.753	304.485	-0.046124
302.721	304	-0.0460327
303.34	302.595	-0.0457659
303.778	302.218	-0.0456866
304.301	302.685	-0.0457803
302.472	303.527	-0.0459465
302.793	303.186	-0.0458853
302.837	302.685	-0.0457915
299.287	305.001	-0.0457703
298.747	304.647	-0.0456055
300.329	304.045	-0.0458139
300.281	303.274	-0.0456761
300.605	303.658	-0.0457994
299.697	302.664	-0.0454647
300.211	302.789	-0.0455803
298.852	302.628	-0.0453046
299.262	302.326	-0.0453274
298.3	304.146	-0.0454385
297.975	303.563	-0.0452848
298.286	303.197	-0.0452918
298.339	302.686	-0.0452216
294.787	305.001	-0.0444133
294.247	304.647	-0.0441512
295.826	304.055	-0.044694
295.863	303.292	-0.0446027
296.127	303.68	-0.0447591
294.353	302.623	-0.0439399
294.765	302.303	-0.0440536
293.8	304.146	-0.0439099
293.475	303.563	-0.0437126
293.786	303.197	-0.0437926
293.839	302.686	-0.0437522
290.287	305.001	-0.0422759
289.747	304.647	-0.0419552
291.326	304.055	-0.0427278
291.363	303.292	-0.0426683
291.627	303.68	-0.0428515
289.853	302.623	-0.0418223
290.265	302.303	-0.042003
289.3	304.146	-0.0416756
288.975	303.563	-0.0414554
289.286	303.197	-0.0415859
289.339	302.686	-0.0415688
285.787	305.001	-0.0396044
285.247	304.647	-0.0392246
286.826	304.055	-0.0401973
286.863	303.292	-0.0401587
287.127	303.68	-0.0403646
285.347	302.618	-0.0391332
285.78	302.298	-0.0393862
284.8	304.146	-0.0388979
284.476	303.576	-0.0386455
284.785	303.203	-0.0388202
284.839	302.686	-0.0388154
281.553	304.786	-0.0366356
281.708	302.6	-0.0365849
282.227	302.646	-0.0369643
280.871	302.587	-0.0360089
281.298	302.279	-0.0362752
304.757	307.636	-0.0464208
305.109	308.221	-0.0464269
304.735	308.709	-0.046421
307.252	309.046	-0.0462449
307.214	308.534	-0.0462441
306.932	308.063	-0.0462879
307.294	307.674	-0.0462251
307.513	307.172	-0.0461853
307.966	307.155	-0.0461078
308.42	306.871	-0.0460226
308.781	307.177	-0.0459625
309.303	307.289	-0.0458706
309.341	307.794	-0.0458676
309.621	308.241	-0.0458201
309.222	308.703	-0.0459007
311.752	309.046	-0.0451894
311.714	308.534	-0.0451907
311.432	308.063	-0.0452894
311.794	307.674	-0.0451467
312.013	307.172	-0.0450578
312.466	307.155	-0.0448862
312.92	306.871	-0.0447059
313.281	307.177	-0.0445732
313.803	307.289	-0.0443727
313.841	307.794	-0.0443651
314.121	308.241	-0.0442642
313.722	308.703	-0.0444291
316.252	309.046	-0.043257
316.214	308.534	-0.0432604
315.932	308.063	-0.0434009
316.294	307.674	-0.0432009
316.513	307.172	-0.04308
316.966	307.155	-0.0428447
317.42	306.871	-0.0426057
317.781	307.177	-0.0424269
318.303	307.289	-0.042165
318.341	307.794	-0.0421531
318.621	308.241	-0.0420185
318.222	308.703	-0.0422335
320.752	309.046	-0.0407582
320.714	308.534	-0.0407658
320.432	308.063	-0.040939
320.794	307.674	-0.0406981
321.013	307.172	-0.0405536
321.466	307.155	-0.0402655
321.92	306.871	-0.0399739
322.281	307.177	-0.0397498
322.803	307.289	-0.0394222
322.841	307.794	-0.0394041
323.121	308.241	-0.0392315
322.722	308.703	-0.0394963
325.217	309.055	-0.0377474
325.214	308.534	-0.0377352
324.932	308.063	-0.0379372
325.294	307.669	-0.0376672
325.442	307.148	-0.037562
325.866	307.071	-0.0372562
326.217	306.656	-0.0370092
326.805	306.893	-0.03661
304.256	309.133	-0.0464099
303.641	309.489	-0.0463944
303.268	309.138	-0.0463914
302.753	308.985	-0.0463829
302.724	308.501	-0.0463829
303.414	307.17	-0.0464038
303.821	306.896	-0.046407
304.305	307.227	-0.0464148
302.485	308.032	-0.0463801
302.814	307.683	-0.0463906
302.948	307.198	-0.0463955
299.288	309.483	-0.0458716
298.747	309.147	-0.0457603
300.309	307.666	-0.0461087
299.709	307.138	-0.0459922
300.21	307.201	-0.0460975
298.866	307.131	-0.0458183
299.288	306.844	-0.0459095
298.3	308.646	-0.045671
297.978	308.071	-0.0456108
298.299	307.699	-0.0456908
298.373	307.179	-0.0457167
294.789	309.467	-0.044457
294.247	309.147	-0.0442394
295.81	307.662	-0.0449036
295.205	307.144	-0.0446729
295.697	307.196	-0.0448734
294.366	307.131	-0.0443339
294.788	306.844	-0.0445122
293.8	308.646	-0.0440627
293.478	308.071	-0.0439428
293.799	307.699	-0.0440868
293.873	307.179	-0.0441318
290.289	309.467	-0.0422787
289.747	309.147	-0.0419936
291.31	307.662	-0.042864
290.705	307.144	-0.042553
291.197	307.196	-0.0428211
289.866	307.131	-0.0421076
290.288	306.844	-0.0423407
289.3	308.646	-0.0417664
288.978	308.071	-0.0416095
289.299	307.699	-0.0417925
289.373	307.179	-0.0418484
285.789	309.468	-0.0395828
285.247	309.147	-0.0392342
286.81	307.662	-0.0402847
286.205	307.144	-0.0399076
286.697	307.196	-0.0402308
285.366	307.131	-0.0393653
285.788	306.844	-0.0396484
284.8	308.646	-0.0389542
284.48	308.074	-0.0387602
284.798	307.7	-0.038981
284.873	307.179	-0.0390466
281.747	307.084	-0.0368104
282.266	307.14	-0.0371889
280.751	306.893	-0.0361252
281.354	306.672	-0.0365496
304.757	298.636	-0.0444266
305.114	299.22	-0.0446482
304.752	299.708	-0.0448432
308.787	300.124	-0.0445099
308.161	300.467	-0.0447524
307.782	300.17	-0.0447015
307.252	300.046	-0.0447484
307.214	299.534	-0.0445517
306.932	299.063	-0.0444171
307.305	298.654	-0.0441955
307.482	298.066	-0.0439374
308.845	298.176	-0.0437558
309.303	298.289	-0.0437274
309.345	298.786	-0.0439047
309.619	299.25	-0.0440314
309.234	299.702	-0.044271
313.287	300.124	-0.043237
312.661	300.467	-0.0435754
312.282	300.17	-0.0435996
311.752	300.046	-0.0437407
311.714	299.534	-0.0435643
311.432	299.063	-0.0434892
311.805	298.654	-0.0432191
311.982	298.066	-0.0429523
313.345	298.176	-0.0425543
313.803	298.289	-0.0424466
313.845	298.786	-0.0425938
314.119	299.25	-0.0426543
313.734	299.702	-0.0429375
317.787	300.124	-0.0412779
317.161	300.467	-0.0416796
316.782	300.17	-0.041769
316.252	300.046	-0.0419896
316.214	299.534	-0.0418453
315.932	299.063	-0.0418369
316.305	298.654	-0.0415361
316.482	298.066	-0.0412814
317.845	298.176	-0.0406905
318.303	298.289	-0.040515
318.345	298.786	-0.0406322
318.619	299.25	-0.0406337
318.234	299.702	-0.0409451
322.287	300.124	-0.0387351
321.661	300.467	-0.0392105
321.282	300.17	-0.0393598
320.752	300.046	-0.0396532
320.714	299.534	-0.0395322
320.432	299.063	-0.039578
320.805	298.654	-0.0392403
320.982	298.066	-0.0389798
322.345	298.176	-0.0381896
322.803	298.289	-0.0379444
322.845	298.786	-0.0380456
323.12	299.247	-0.0379949
322.733	299.701	-0.0383521
325.239	300.04	-0.036735
325.214	299.534	-0.0366167
324.932	299.063	-0.0366989
325.274	298.672	-0.0363548
325.388	298.14	-0.0361435
325.868	298.073	-0.0357909
326.22	297.65	-0.0354413
326.808	297.889	-0.0351153
304.309	300.147	-0.0450181
302.752	300.046	-0.0450071
302.723	299.5	-0.0447963
303.34	298.095	-0.0442413
[truncated: 4,673 more rows]

## Sheet: Figure-12-c-d
300.289	308.936	-0.0487523
300.838	308.878	-0.0487879
300.407	309.377	-0.0487753
301.011	309.448	-0.0488124
295.789	308.936	-0.0486511
296.324	308.918	-0.0486836
295.907	309.376	-0.0486705
296.449	309.53	-0.0487015
291.289	308.936	-0.0486354
291.824	308.918	-0.0486483
291.407	309.376	-0.0486482
291.949	309.53	-0.0486591
286.789	308.936	-0.0486422
287.324	308.918	-0.0486756
286.907	309.376	-0.0486601
287.449	309.53	-0.0486904
300.289	313.436	-0.0487192
300.838	313.378	-0.0487567
300.407	313.877	-0.0487443
301.011	313.948	-0.0487834
295.789	313.436	-0.0486195
296.324	313.418	-0.0486498
295.907	313.876	-0.0486466
296.449	314.03	-0.0486776
291.289	313.436	-0.0486357
291.824	313.418	-0.0486428
291.407	313.876	-0.048663
291.949	314.03	-0.048673
286.789	313.436	-0.0487035
287.324	313.418	-0.048729
286.907	313.876	-0.0487467
287.449	314.03	-0.0487775
282.289	322.438	-0.0491578
282.824	322.418	-0.0492653
282.408	322.876	-0.0492319
282.947	323.035	-0.0493535
300.289	326.936	-0.0488694
300.838	326.878	-0.0488895
300.407	327.377	-0.0488579
301.013	327.444	-0.0488706
295.789	326.936	-0.0490376
296.324	326.918	-0.0490204
295.907	327.376	-0.0490238
296.455	327.533	-0.0489947
291.289	326.936	-0.0494572
291.824	326.918	-0.0494207
291.407	327.376	-0.0494385
291.961	327.538	-0.0493891
286.789	326.936	-0.0497347
287.324	326.918	-0.0497487
286.907	327.376	-0.0497152
287.456	327.533	-0.0497121
282.774	302.723	-0.0486412
283.21	303.128	-0.0486634
282.503	303.191	-0.0485233
282.758	303.709	-0.0485263
300.728	307.947	-0.0487732
301.296	308.242	-0.0488056
300.503	308.473	-0.04875
296.228	307.947	-0.0486769
296.768	308.337	-0.0487
296.003	308.473	-0.0486507
291.728	307.947	-0.0486506
292.268	308.337	-0.0486523
291.503	308.473	-0.0486311
287.228	307.947	-0.0486773
287.768	308.337	-0.0486921
287.003	308.473	-0.0486487
282.803	307.214	-0.0483277
283.231	307.609	-0.0483728
282.503	307.691	-0.0482279
282.761	308.212	-0.0482615
300.728	312.447	-0.0487389
301.296	312.742	-0.0487758
300.503	312.973	-0.0487159
296.228	312.447	-0.0486271
296.768	312.837	-0.0486562
296.003	312.973	-0.0486101
291.728	312.447	-0.048614
292.268	312.837	-0.0486246
291.503	312.973	-0.0486133
287.228	312.447	-0.0486771
287.768	312.837	-0.0487078
287.003	312.973	-0.0486802
282.789	311.707	-0.0482974
283.229	312.108	-0.0483724
282.503	312.191	-0.0482372
282.761	312.712	-0.0483077
282.774	293.722	-0.049695
283.21	294.128	-0.0497338
282.503	294.191	-0.0495664
282.758	294.709	-0.049572
282.728	321.447	-0.0491428
283.262	321.842	-0.0492818
282.503	321.973	-0.0491442
300.728	325.947	-0.0489155
301.296	326.242	-0.0489257
300.503	326.473	-0.0488837
296.228	325.947	-0.0490397
296.768	326.337	-0.0490155
296.003	326.473	-0.0490314
291.728	325.947	-0.0494385
292.268	326.337	-0.049391
291.503	326.473	-0.0494441
287.228	325.947	-0.0497791
287.768	326.337	-0.049765
287.003	326.473	-0.0497556
282.808	325.223	-0.049397
283.232	325.61	-0.0494646
282.503	325.691	-0.0492985
282.761	326.212	-0.0493343
288.744	330.689	-0.0491828
288.343	330.051	-0.0493269
289.031	330.172	-0.049246
288.795	329.688	-0.0493685
295.341	301.966	-0.0488783
296.004	302.161	-0.0488812
295.372	302.535	-0.0488164
295.911	302.815	-0.0488227
290.841	301.966	-0.0489613
291.504	302.161	-0.0489374
290.872	302.535	-0.0488893
291.411	302.815	-0.048871
286.329	301.965	-0.0490418
287	302.153	-0.0490483
286.372	302.535	-0.0489578
286.911	302.815	-0.0489606
295.341	297.466	-0.0491135
296.004	297.661	-0.0490896
295.372	298.035	-0.0490374
295.906	298.32	-0.0490232
290.841	297.466	-0.0493695
291.504	297.661	-0.0493134
290.872	298.035	-0.0492651
291.406	298.32	-0.049217
286.341	297.466	-0.0495859
287.004	297.661	-0.0495701
286.372	298.035	-0.0494729
286.906	298.32	-0.0494514
282.728	298.947	-0.0490315
283.293	299.349	-0.0490852
282.505	299.522	-0.0489162
282.919	299.983	-0.0489592
295.341	292.966	-0.0494959
296.004	293.161	-0.0494426
295.372	293.535	-0.0494071
295.906	293.82	-0.0493618
290.841	292.966	-0.0499248
291.504	293.161	-0.0498488
290.872	293.535	-0.0498184
291.406	293.82	-0.0497493
286.329	292.965	-0.0501781
286.999	293.154	-0.0501758
286.372	293.535	-0.0500869
286.906	293.82	-0.0500724
295.341	319.966	-0.0488124
296.004	320.161	-0.0488176
295.372	320.535	-0.0488121
295.911	320.815	-0.0488266
290.841	319.966	-0.0490699
291.504	320.161	-0.049049
290.872	320.535	-0.0490924
291.411	320.815	-0.0490904
286.33	319.965	-0.0493207
287	320.153	-0.0493491
286.372	320.535	-0.0493645
286.911	320.815	-0.0494063
300.7	316.942	-0.0487256
301.296	317.242	-0.0487636
300.49	317.526	-0.0487106
300.85	317.974	-0.0487597
296.228	316.947	-0.048664
296.779	317.323	-0.048693
295.997	317.515	-0.0486632
296.373	317.95	-0.048712
291.728	316.947	-0.0487478
292.279	317.323	-0.0487649
291.497	317.515	-0.0487806
291.873	317.95	-0.0488279
287.228	316.947	-0.0489527
287.779	317.323	-0.0489908
286.997	317.515	-0.0489992
287.373	317.95	-0.0490702
282.728	316.947	-0.0486374
283.293	317.349	-0.0487791
282.505	317.522	-0.0486538
282.919	317.983	-0.0488019
299.819	288.482	-0.0492162
300.502	288.675	-0.049196
299.844	289.059	-0.0492199
300.405	289.323	-0.0492111
295.341	288.466	-0.049579
296.003	288.661	-0.0495375
295.372	289.035	-0.0495773
295.906	289.32	-0.0495505
290.819	288.48	-0.0500427
291.506	288.667	-0.0500022
290.845	289.057	-0.0500498
291.406	289.321	-0.0500213
286.33	288.465	-0.0501701
286.999	288.654	-0.0502292
286.372	289.035	-0.0502086
286.906	289.32	-0.0502633
282.728	289.947	-0.0497418
283.287	290.354	-0.0499029
282.505	290.522	-0.0497122
282.919	290.983	-0.0498475
308.395	301.883	-0.0488615
309.03	301.691	-0.0488725
308.625	302.227	-0.0488473
309.232	302.305	-0.0488719
312.895	301.883	-0.0489049
313.53	301.691	-0.0489262
313.125	302.227	-0.0488932
313.732	302.305	-0.0489238
317.395	301.883	-0.0490896
318.03	301.691	-0.0491367
317.625	302.227	-0.0490824
318.232	302.305	-0.0491319
321.895	301.883	-0.0492207
322.53	301.691	-0.0492104
322.125	302.227	-0.0491845
322.73	302.306	-0.0491683
300.849	304.184	-0.0488329
300.882	304.877	-0.0488444
300.352	304.52	-0.0488104
300.275	304.99	-0.0488266
296.328	304.215	-0.048793
296.349	304.913	-0.0487917
295.828	304.522	-0.0487639
295.753	305	-0.048772
296.539	302.593	-0.0488693
296.36	303.185	-0.0488281
291.828	304.215	-0.0488009
291.849	304.913	-0.0487865
291.328	304.522	-0.0487843
291.253	305	-0.0487847
292.039	302.593	-0.0488989
291.86	303.185	-0.0488529
287.328	304.215	-0.0488741
287.349	304.913	-0.048846
286.828	304.522	-0.0488329
286.753	305	-0.0488194
287.539	302.593	-0.0490141
287.36	303.185	-0.0489493
282.588	304.683	-0.0484466
282.471	305.296	-0.0483936
282.104	304.75	-0.048345
281.834	305.335	-0.0482755
283.414	303.851	-0.048628
300.734	307.396	-0.0487991
301.318	307.669	-0.0488181
296.256	307.337	-0.0487114
296.806	307.588	-0.0487232
291.756	307.337	-0.048685
292.306	307.588	-0.0486773
287.256	307.337	-0.048714
287.806	307.588	-0.0487195
283.415	308.353	-0.0483754
308.395	297.383	-0.0488547
309.03	297.191	-0.0488739
308.625	297.727	-0.0488275
309.232	297.805	-0.0488495
312.895	297.383	-0.0489469
313.53	297.191	-0.0489978
313.125	297.727	-0.048923
313.732	297.805	-0.0489691
317.395	297.383	-0.0492674
318.03	297.191	-0.0493498
317.625	297.727	-0.0492396
318.232	297.805	-0.0493045
321.895	297.383	-0.0495153
322.53	297.191	-0.0495225
322.125	297.727	-0.049459
322.721	297.811	-0.049444
296.539	298.093	-0.0490529
296.353	298.698	-0.0490092
292.039	298.093	-0.0492372
291.853	298.698	-0.0491698
287.539	298.093	-0.0495019
287.353	298.698	-0.04941
282.764	298.325	-0.0491357
283.31	298.579	-0.0491903
300.734	311.896	-0.0487632
301.318	312.169	-0.0487879
296.256	311.837	-0.0486516
296.806	312.087	-0.0486683
291.756	311.837	-0.0486286
292.306	312.087	-0.0486267
287.256	311.837	-0.0486798
287.806	312.087	-0.0486952
283.415	312.852	-0.0484283
308.395	292.883	-0.0490408
309.03	292.691	-0.0490706
308.625	293.227	-0.0490103
309.232	293.305	-0.0490363
312.895	292.883	-0.0492324
313.53	292.691	-0.0493094
313.125	293.227	-0.0492044
313.732	293.305	-0.0492684
317.395	292.883	-0.0496834
318.03	292.691	-0.049776
317.625	293.227	-0.0496545
318.232	293.305	-0.0497278
321.895	292.883	-0.0499307
322.53	292.691	-0.0499166
322.125	293.227	-0.0498793
322.73	293.306	-0.0498521
296.539	293.593	-0.0493768
296.353	294.198	-0.0493196
292.039	293.593	-0.0497492
291.853	294.198	-0.0496776
287.539	293.593	-0.0501167
287.353	294.198	-0.0500319
282.59	295.682	-0.0494574
282.483	296.299	-0.0493728
282.107	295.747	-0.0493432
281.826	296.313	-0.0492398
283.413	294.851	-0.0496898
308.395	319.883	-0.0490734
309.03	319.691	-0.0491067
308.625	320.227	-0.0490834
309.232	320.305	-0.0491361
312.895	319.883	-0.0493527
313.53	319.691	-0.0494017
313.125	320.227	-0.0493799
313.732	320.305	-0.0494586
317.395	319.883	-0.0498072
318.03	319.691	-0.0498615
317.625	320.227	-0.0498552
318.232	320.305	-0.0499467
321.895	319.883	-0.0501088
322.53	319.691	-0.0500695
322.125	320.227	-0.0501365
322.73	320.306	-0.050134
300.849	322.184	-0.0488803
300.882	322.877	-0.0489216
300.352	322.52	-0.0488732
300.275	322.99	-0.0489103
296.328	322.215	-0.0489107
296.349	322.913	-0.0489698
295.828	322.522	-0.0489318
295.753	323	-0.0489882
296.539	320.593	-0.0488342
296.36	321.185	-0.0488517
291.828	322.215	-0.0492013
291.849	322.913	-0.0492833
291.328	322.522	-0.0492609
291.253	323	-0.0493362
292.039	320.593	-0.0490517
291.86	321.185	-0.0491029
287.328	322.215	-0.0495614
287.349	322.913	-0.049648
286.828	322.522	-0.0495929
286.753	323	-0.0496595
287.539	320.593	-0.0493864
287.36	321.185	-0.0494477
282.752	320.859	-0.0491047
283.282	321.111	-0.0492173
300.734	325.396	-0.0489451
301.318	325.669	-0.0489512
296.256	325.337	-0.0490581
296.806	325.588	-0.0490341
291.756	325.337	-0.049445
292.306	325.588	-0.0493965
287.256	325.337	-0.0497946
287.806	325.588	-0.0497818
283.416	326.353	-0.0494659
281.437	324.711	-0.0491119
281.054	324.167	-0.0490428
281.829	324	-0.0491938
281.346	323.612	-0.0490822
282.091	324.649	-0.0492552
300.746	316.388	-0.0487481
301.318	316.669	-0.0487713
296.256	316.34	-0.048675
296.807	316.587	-0.0486892
291.756	316.34	-0.0487348
292.307	316.587	-0.0487329
287.256	316.34	-0.0489158
287.807	316.587	-0.0489302
282.756	316.329	-0.0485979
283.308	316.581	-0.0487055
288.021	330.661	-0.0492316
308.396	288.368	-0.0489841
309.027	288.193	-0.0489992
308.625	288.727	-0.0490016
309.229	288.812	-0.0490448
312.9	288.368	-0.0492575
313.535	288.192	-0.0493102
313.125	288.727	-0.0492864
313.731	288.81	-0.0493647
317.399	288.368	-0.0497046
318.028	288.193	-0.0497448
317.625	288.727	-0.0497407
318.228	288.811	-0.0498105
321.9	288.368	-0.0498124
322.528	288.193	-0.0497374
322.125	288.727	-0.0498292
322.726	288.811	-0.0497929
301.039	289.093	-0.0491929
300.849	289.702	-0.0492133
296.539	289.093	-0.0495139
296.353	289.698	-0.0495338
292.039	289.093	-0.049974
291.853	289.698	-0.0499979
287.539	289.093	-0.0502768
287.353	289.698	-0.0503017
282.754	289.35	-0.0497185
283.29	289.607	-0.0498626
324.137	285.933	-0.0490805
323.474	285.597	-0.0491098
324.361	285.354	-0.0489177
324.026	284.9	-0.0488949
301.085	284.45	-0.0486743
300.356	284.679	-0.0487291
299.622	284.373	-0.0487326
289.958	284.373	-0.0495145
289.202	284.667	-0.0495947
288.46	284.449	-0.0495978
280.054	328.843	-0.0485464
280.283	329.578	-0.0484508
280.016	330.291	-0.0482693
280.046	301.856	-0.0482814
280.28	302.593	-0.0482227
279.984	303.323	-0.048099
324.454	296.801	-0.0494169
324.14	297.22	-0.049418
323.859	296.698	-0.0494933
323.645	297.178	-0.0494725
305.756	305.992	-0.0489428
305.638	305.525	-0.0489249
306.183	305.741	-0.0489409
306.134	305.151	-0.0489199
310.307	305.869	-0.0490126
310.178	305.408	-0.0489853
310.705	305.667	-0.0490028
310.673	305.091	-0.0489752
314.807	305.869	-0.0490783
314.678	305.408	-0.0490495
315.205	305.667	-0.0490793
315.173	305.091	-0.0490525
319.307	305.869	-0.0492439
319.178	305.408	-0.0492211
319.705	305.667	-0.0492414
319.673	305.091	-0.0492227
305.756	310.493	-0.0489709
305.637	310.025	-0.0489549
306.183	310.241	-0.0489765
306.134	309.652	-0.0489594
310.307	310.369	-0.0490907
310.178	309.908	-0.0490665
310.705	310.167	-0.049086
310.673	309.591	-0.0490629
314.807	310.369	-0.0491828
314.678	309.908	-0.0491538
315.205	310.167	-0.0491849
315.173	309.591	-0.0491572
319.307	310.369	-0.0493532
319.178	309.908	-0.0493217
319.705	310.167	-0.0493457
319.673	309.591	-0.0493143
323.79	310.39	-0.0491737
323.68	309.969	-0.0491565
324.191	310.201	-0.0491094
324.127	309.66	-0.0490849
305.756	314.993	-0.0489637
305.637	314.525	-0.0489493
306.183	314.741	-0.0489735
306.134	314.152	-0.0489599
310.307	314.869	-0.0491269
310.178	314.408	-0.0491038
310.705	314.667	-0.0491285
310.673	314.091	-0.0491085
314.807	314.869	-0.0492918
314.678	314.408	-0.0492573
315.205	314.667	-0.0492992
315.173	314.091	-0.0492669
319.307	314.869	-0.049563
319.178	314.408	-0.0495151
319.705	314.667	-0.0495591
319.673	314.091	-0.0495098
323.79	314.89	-0.0494676
323.681	314.469	-0.0494292
324.193	314.702	-0.0493981
324.128	314.161	-0.0493469
305.756	323.992	-0.0491398
305.638	323.525	-0.0491108
306.183	323.741	-0.049152
306.134	323.151	-0.0491183
310.307	323.869	-0.0494672
310.178	323.408	-0.0494163
310.705	323.667	-0.0494834
310.673	323.091	-0.0494312
314.807	323.869	-0.0499743
314.678	323.408	-0.0499007
315.205	323.667	-0.0500019
315.173	323.091	-0.0499279
319.307	323.869	-0.0505321
319.178	323.408	-0.0504604
319.705	323.667	-0.0505388
319.673	323.091	-0.0504637
305.749	328.487	-0.0489723
305.639	328.019	-0.0490002
306.177	328.243	-0.0490217
306.135	327.647	-0.0490597
310.311	328.362	-0.0494082
310.179	327.906	-0.0494172
310.703	328.162	-0.0494618
310.659	327.607	-0.049485
319.311	328.362	-0.0504851
319.179	327.906	-0.050513
319.704	328.161	-0.0505234
319.659	327.607	-0.0505665
283.774	302.011	-0.048868
283.64	301.358	-0.0489304
284.409	301.495	-0.0489863
283.996	300.884	-0.0490212
283.133	301.784	-0.0488116
283.253	302.426	-0.0487525
283.817	302.705	-0.0487898
296.66	306.254	-0.0487807
297.411	306.326	-0.0487862
296.782	306.894	-0.0487545
297.389	307.143	-0.0487507
292.16	306.254	-0.0487478
292.911	306.326	-0.0487332
292.282	306.894	-0.0487131
292.889	307.143	-0.0486911
287.66	306.254	-0.0487955
288.411	306.326	-0.0487901
287.782	306.894	-0.0487581
288.389	307.143	-0.0487421
283.17	306.217	-0.0484575
283.861	306.351	-0.0485376
283.299	306.878	-0.04843
283.864	307.156	-0.0484847
283.161	297.239	-0.0493739
283.86	297.354	-0.0494497
283.278	297.882	-0.0492927
283.865	298.15	-0.0493266
296.671	310.76	-0.0487055
297.412	310.826	-0.0487164
296.783	311.394	-0.0486893
297.389	311.643	-0.0486915
292.171	310.76	-0.0486574
292.912	310.826	-0.0486461
292.283	311.394	-0.0486418
292.889	311.643	-0.0486264
287.671	310.76	-0.0487027
288.412	310.826	-0.0487006
287.783	311.394	-0.048698
288.389	311.643	-0.048692
283.141	310.738	-0.0483526
283.859	310.851	-0.0484471
283.29	311.377	-0.0483755
283.863	311.656	-0.0484504
283.774	293.011	-0.0499512
283.64	292.358	-0.0499825
284.409	292.495	-0.0500789
283.995	291.884	-0.0500613
283.133	292.783	-0.0498601
283.254	293.426	-0.049823
283.817	293.704	-0.0498828
283.771	320.017	-0.049179
283.638	319.362	-0.0490925
284.409	319.495	-0.0491786
283.995	318.885	-0.0490714
283.128	319.796	-0.0490703
283.237	320.449	-0.0491513
283.823	320.703	-0.0492517
296.66	324.254	-0.0490437
297.411	324.326	-0.0490129
296.782	324.894	-0.0490446
297.389	325.143	-0.0490139
292.16	324.254	-0.0493821
292.911	324.326	-0.0493077
292.282	324.894	-0.0493934
292.889	325.143	-0.0493321
287.66	324.254	-0.0497644
288.411	324.326	-0.0497234
287.782	324.894	-0.0497816
288.389	325.143	-0.0497482
283.168	324.244	-0.0494677
283.913	324.323	-0.0495829
283.287	324.875	-0.0494936
283.89	325.114	-0.0495846
296.671	315.26	-0.0487023
297.412	315.326	-0.0487078
296.782	315.899	-0.0486967
297.388	316.149	-0.0486969
292.171	315.26	-0.0487127
292.912	315.326	-0.0486924
292.282	315.899	-0.0487197
292.888	316.149	-0.0487032
287.671	315.26	-0.0488593
288.412	315.326	-0.0488413
287.782	315.899	-0.0488905
288.388	316.149	-0.048881
283.139	315.249	-0.0485822
283.859	315.355	-0.0486784
283.266	315.887	-0.0486461
283.866	316.153	-0.0487383
283.772	288.509	-0.0498627
283.638	287.837	-0.0497471
284.382	288.017	-0.0498987
284.001	287.345	-0.0497316
283.149	288.278	-0.0497071
283.249	288.934	-0.0498019
283.827	289.196	-0.0499401
324.348	306.268	-0.0490076
324.84	306.146	-0.0489299
324.572	306.748	-0.0489611
325.14	306.655	-0.0488695
324.391	324.278	-0.0503912
324.897	324.133	-0.0502916
324.615	324.799	-0.050354
325.163	324.649	-0.0502474
314.644	328.774	-0.049914
314.785	329.188	-0.0498745
314.193	329.007	-0.0498077
314.306	329.535	-0.0497476
323.625	328.779	-0.0502605
323.765	329.2	-0.0501616
323.181	328.989	-0.0502688
323.289	329.536	-0.0501535
310.834	287.553	-0.0490658
310.71	287.097	-0.0489951
311.306	287.33	-0.0490571
311.241	286.721	-0.0489668
315.355	287.568	-0.0494633
315.209	287.081	-0.0493769
315.81	287.35	-0.0494667
315.74	286.755	-0.0493679
319.869	287.575	-0.0497839
319.715	287.038	-0.0496858
320.409	287.33	-0.0497316
320.266	286.78	-0.0496315
302.416	302.265	-0.0488743
302.439	301.586	-0.0488934
303.06	302.016	-0.0488547
302.998	301.241	-0.0488733
301.407	302.14	-0.0489012
301.334	302.866	-0.0488695
300.727	302.337	-0.0488766
300.749	303.101	-0.0488439
307.338	305.757	-0.048928
307.968	306.031	-0.0489283
307.273	306.545	-0.0489277
307.95	306.68	-0.0489225
311.837	305.751	-0.0489845
312.467	306.03	-0.0489844
311.767	306.533	-0.0489906
312.45	306.68	-0.0489837
316.337	305.751	-0.0490971
316.967	306.03	-0.0491161
316.267	306.533	-0.0491015
316.95	306.68	-0.0491148
320.836	305.75	-0.0492188
321.467	306.03	-0.0491959
320.767	306.533	-0.0492195
321.45	306.68	-0.0491901
302.416	297.765	-0.0489252
302.439	297.086	-0.0489603
303.06	297.516	-0.0489008
302.998	296.741	-0.0489434
301.407	297.643	-0.0489734
301.333	298.378	-0.0489345
300.727	297.841	-0.0489604
300.751	298.615	-0.0489196
307.338	310.257	-0.0489777
307.968	310.531	-0.0489825
307.273	311.045	-0.0489691
307.95	311.18	-0.0489699
311.837	310.251	-0.0490752
312.467	310.53	-0.0490771
311.767	311.033	-0.0490746
312.45	311.18	-0.0490717
316.337	310.251	-0.049205
316.967	310.53	-0.0492269
316.267	311.033	-0.049213
316.95	311.18	-0.0492304
320.837	310.251	-0.0493218
321.467	310.53	-0.0493056
320.767	311.033	-0.0493449
321.45	311.18	-0.0493207
302.416	293.265	-0.0491163
302.439	292.586	-0.0491549
303.06	293.016	-0.0490881
302.998	292.241	-0.0491299
301.407	293.143	-0.0491802
301.333	293.878	-0.0491282
300.727	293.341	-0.049179
300.751	294.115	-0.0491195
302.416	320.265	-0.0488646
302.439	319.59	-0.0488569
303.06	320.016	-0.048858
302.997	319.244	-0.0488456
301.407	320.14	-0.0488566
301.334	320.866	-0.0488593
300.727	320.337	-0.04883
300.749	321.101	-0.0488383
307.338	323.757	-0.0491976
307.968	324.031	-0.0492393
307.273	324.545	-0.0492076
307.95	324.68	-0.0492439
311.837	323.751	-0.0495704
312.467	324.03	-0.0496462
311.767	324.533	-0.0496034
312.45	324.68	-0.049672
316.337	323.751	-0.0501353
316.967	324.03	-0.050234
316.267	324.533	-0.0501878
316.95	324.68	-0.0502742
320.836	323.75	-0.0505809
321.467	324.03	-0.0505997
320.767	324.533	-0.0506344
321.45	324.68	-0.0506335
307.338	314.757	-0.0489837
307.968	315.031	-0.0489924
307.273	315.545	-0.0489706
307.95	315.68	-0.0489771
311.837	314.751	-0.0491338
312.467	315.03	-0.049146
311.767	315.533	-0.049132
312.45	315.68	-0.0491427
316.337	314.751	-0.0493412
316.967	315.03	-0.0493808
316.267	315.533	-0.0493597
316.95	315.68	-0.0493962
320.837	314.751	-0.0495638
321.467	315.03	-0.049572
320.767	315.533	-0.0496174
321.45	315.68	-0.0496157
307.334	328.269	-0.0490869
307.965	328.542	-0.0491056
307.255	329.079	-0.0489866
307.949	329.2	-0.0490208
311.835	328.242	-0.0495629
312.461	328.529	-0.049604
311.758	328.996	-0.0494737
312.45	329.18	-0.0495222
316.33	328.278	-0.0501597
316.964	328.544	-0.0501988
316.248	329.085	-0.0500518
316.947	329.198	-0.050105
320.836	328.242	-0.0505171
321.462	328.529	-0.0504558
320.762	328.999	-0.0504045
321.45	329.18	-0.0503451
293.03	330.202	-0.048966
292.624	329.898	-0.0490585
293.214	329.747	-0.0490148
292.788	329.319	-0.0491297
284.022	330.218	-0.0490603
283.62	329.897	-0.049064
284.18	329.788	-0.0491603
283.78	329.322	-0.0491958
302.391	288.776	-0.0490963
302.462	288.088	-0.0490504
303.06	288.517	-0.049033
302.991	287.745	-0.0489789
308.812	304.493	-0.0488724
309.228	304.82	-0.0489021
308.491	304.882	-0.0488761
308.703	305.541	-0.0489236
307.949	305.352	-0.0489045
307.846	304.769	-0.0488607
307.318	305.115	-0.0489017
313.312	304.493	-0.0489225
313.728	304.82	-0.0489534
312.991	304.882	-0.0489261
313.203	305.541	-0.0489763
312.449	305.351	-0.0489565
312.346	304.769	-0.04891
311.819	305.114	-0.0489539
317.812	304.493	-0.0490898
318.228	304.82	-0.0491279
317.491	304.882	-0.049082
317.703	305.541	-0.0491308
316.949	305.351	-0.0490916
316.846	304.769	-0.0490482
316.319	305.114	-0.0490694
322.312	304.493	-0.0491259
322.694	304.793	-0.0491146
321.991	304.882	-0.0491403
322.192	305.535	-0.0491565
321.447	305.35	-0.0491828
321.346	304.769	-0.0491578
320.819	305.114	-0.0492021
299.825	304.761	-0.0487862
299.832	305.336	-0.048813
295.301	304.746	-0.0487359
295.332	305.336	-0.0487536
290.801	304.746	-0.0487709
290.832	305.336	-0.0487755
286.301	304.746	-0.0487866
286.332	305.336	-0.0487809
282.951	304.298	-0.0485284
282.376	304.213	-0.0484176
308.812	308.993	-0.0489484
309.228	309.32	-0.0489798
308.491	309.382	-0.0489459
308.703	310.041	-0.0489901
307.949	309.852	-0.0489648
307.846	309.269	-0.0489246
307.318	309.615	-0.0489567
313.312	308.993	-0.0490251
313.728	309.32	-0.0490564
312.991	309.382	-0.049027
313.203	310.041	-0.0490757
312.449	309.851	-0.0490533
312.346	309.269	-0.0490092
311.819	309.614	-0.0490488
317.812	308.993	-0.0491819
318.228	309.32	-0.0492226
317.491	309.382	-0.0491808
317.703	310.041	-0.0492371
316.949	309.851	-0.0491967
316.846	309.269	-0.0491483
316.319	309.614	-0.0491736
322.312	308.993	-0.0491769
322.728	309.32	-0.0491732
321.991	309.382	-0.0492081
322.203	310.041	-0.049246
321.449	309.851	-0.0492704
321.346	309.269	-0.0492276
320.819	309.614	-0.0492867
326.306	309.714	-0.048717
325.792	310.094	-0.0488343
325.776	309.36	-0.0487777
325.277	309.701	-0.0489009
299.82	309.207	-0.0487228
299.872	309.748	-0.0487529
295.32	309.207	-0.0486233
295.363	309.756	-0.0486502
290.82	309.207	-0.0486241
290.863	309.756	-0.0486468
286.32	309.207	-0.0486059
286.363	309.756	-0.0486315
282.11	309.588	-0.0481597
281.759	310.115	-0.0481004
281.701	309.377	-0.0480637
281.215	309.7	-0.0479878
282.93	308.818	-0.0482949
282.498	309.27	-0.0482241
282.356	308.716	-0.0481771
282.11	309.133	-0.0481452
326.347	300.835	-0.0488029
325.85	301.126	-0.0488788
325.8	300.374	-0.0488945
325.282	300.697	-0.048983
303.839	300.386	-0.0488295
303.507	300.852	-0.0488515
303.33	300.249	-0.0488265
302.848	300.575	-0.0488667
282.198	300.65	-0.0487723
281.869	301.152	-0.04866
281.734	300.388	-0.0486912
281.224	300.767	-0.0485717
308.812	313.493	-0.048979
309.228	313.82	-0.0490112
308.491	313.882	-0.0489695
308.703	314.541	-0.0490101
307.949	314.352	-0.0489791
307.846	313.769	-0.0489431
307.318	314.115	-0.0489674
313.312	313.493	-0.0491076
313.728	313.82	-0.0491438
312.991	313.882	-0.0491041
313.203	314.541	-0.0491557
312.449	314.351	-0.0491218
312.346	313.769	-0.0490782
311.819	314.114	-0.0491092
317.812	313.493	-0.0493287
318.228	313.82	-0.0493821
317.491	313.882	-0.0493272
317.703	314.541	-0.0493988
316.949	314.351	-0.0493396
316.846	313.769	-0.0492823
316.319	314.114	-0.0493023
322.312	313.493	-0.0493919
322.728	313.82	-0.0494061
321.991	313.882	-0.0494344
322.203	314.541	-0.0495036
321.449	314.351	-0.0495079
321.346	313.769	-0.049441
320.819	314.114	-0.0495046
326.352	314.239	-0.0489896
325.809	314.618	-0.0491287
325.786	313.871	-0.0490333
325.271	314.209	-0.0491745
299.82	313.707	-0.0486897
299.872	314.248	-0.0487233
295.32	313.707	-0.048599
295.363	314.256	-0.0486376
290.82	313.707	-0.0486394
290.863	314.256	-0.0486834
286.32	313.707	-0.0486895
286.363	314.256	-0.0487506
282.109	314.09	-0.0483107
281.754	314.626	-0.0482929
281.701	313.878	-0.0482005
281.193	314.243	-0.0481517
282.93	313.318	-0.0483845
282.498	313.771	-0.0483494
282.356	313.216	-0.0482622
282.11	313.633	-0.0482622
303.839	295.886	-0.0489228
303.507	296.352	-0.0489296
303.33	295.749	-0.0489326
302.848	296.075	-0.0489637
282.949	295.3	-0.0495622
282.376	295.212	-0.0494398
308.812	322.493	-0.0491902
309.228	322.82	-0.049254
308.491	322.882	-0.0491882
308.703	323.541	-0.0492661
307.949	323.352	-0.0491988
307.846	322.769	-0.0491358
307.318	323.115	-0.0491562
313.312	322.493	-0.0495711
313.728	322.82	-0.0496674
312.991	322.882	-0.0495705
313.203	323.541	-0.0496853
312.449	323.351	-0.0495793
312.346	322.769	-0.0494888
311.819	323.114	-0.0495056
317.812	322.493	-0.0501279
318.228	322.82	-0.0502347
317.491	322.882	-0.0501351
317.703	323.541	-0.0502695
316.949	323.351	-0.0501484
316.846	322.769	-0.0500374
316.319	323.114	-0.0500501
322.312	322.493	-0.0503928
322.694	322.793	-0.050417
321.991	322.882	-0.0504465
322.192	323.535	-0.0505306
321.447	323.35	-0.0505273
321.346	322.769	-0.0504385
320.819	323.114	-0.0505035
299.825	322.761	-0.0488646
299.832	323.336	-0.048918
295.301	322.746	-0.0489545
295.332	323.336	-0.0490289
290.801	322.746	-0.0493146
290.832	323.336	-0.0494058
286.301	322.746	-0.0495998
286.332	323.336	-0.0496862
281.824	322.719	-0.0490848
281.859	323.289	-0.049158
308.812	326.993	-0.0492681
309.228	327.319	-0.0493062
308.491	327.382	-0.0492168
308.703	328.041	-0.049216
307.948	327.855	-0.0491558
307.846	327.269	-0.0491621
307.318	327.616	-0.0491272
313.312	326.993	-0.0497817
313.72	327.333	-0.0498375
312.991	327.382	-0.0497231
313.193	328.058	-0.0497339
312.449	327.854	-0.049648
312.346	327.269	-0.0496433
311.819	327.613	-0.0495936
317.812	326.993	-0.0503885
318.228	327.319	-0.0504297
317.491	327.382	-0.0503315
317.703	328.041	-0.050329
316.949	327.857	-0.0502543
316.846	327.269	-0.0502573
316.318	327.621	-0.0502
322.312	326.993	-0.0505524
322.723	327.332	-0.0505013
321.991	327.382	-0.0505421
322.194	328.058	-0.0504757
321.45	327.854	-0.0505356
321.346	327.269	-0.0505756
320.819	327.613	-0.050578
326.335	327.836	-0.0498395
325.794	328.145	-0.0499252
325.785	327.389	-0.0499832
325.257	327.723	-0.0500819
299.82	327.207	-0.0488437
299.872	327.748	-0.048828
295.32	327.207	-0.0490459
295.363	327.756	-0.0490332
290.82	327.207	-0.0494759
290.863	327.756	-0.0494572
286.32	327.207	-0.0496926
286.363	327.756	-0.0496603
282.103	327.567	-0.0491176
281.761	328.129	-0.0489823
281.692	327.371	-0.0490312
281.214	327.765	-0.0489011
282.929	326.818	-0.0493462
282.493	327.264	-0.0492259
282.355	326.715	-0.0492161
282.11	327.133	-0.0491473
326.307	318.735	-0.0494761
325.794	319.09	-0.0496213
325.783	318.353	-0.0494973
325.259	318.689	-0.0496532
303.839	318.386	-0.0488126
303.507	318.852	-0.0488319
303.33	318.249	-0.0487863
302.848	318.575	-0.0488143
282.199	318.648	-0.04877
281.872	319.145	-0.0487728
281.734	318.388	-0.0486271
281.244	318.742	-0.0485953
311.119	330.743	-0.0491578
310.821	330.241	-0.049208
311.588	330.192	-0.0492734
311.292	329.657	-0.0493378
320.211	330.697	-0.0501037
319.86	330.184	-0.0502003
320.605	330.191	-0.0501786
320.317	329.677	-0.0502916
302.243	330.725	-0.0484582
301.861	330.073	-0.0485642
302.558	330.212	-0.0485286
302.366	329.691	-0.0486261
300.768	329.802	-0.0485953
301.132	330.22	-0.0485362
300.482	330.211	-0.0485081
300.827	330.734	-0.0484432
297.717	330.757	-0.048511
297.336	330.089	-0.0486473
298.057	330.212	-0.0485622
297.797	329.706	-0.0486776
296.252	329.818	-0.048753
296.606	330.201	-0.0486757
295.998	330.212	-0.0486873
296.308	330.738	-0.0486012
293.212	330.658	-0.0488614
293.588	330.187	-0.0488822
287.242	329.797	-0.0493843
287.608	330.167	-0.0493219
286.975	330.199	-0.0492834
287.327	330.683	-0.0492158
284.212	330.664	-0.0489899
284.583	330.193	-0.0491105
326.307	291.736	-0.0493469
325.794	292.09	-0.0494628
325.783	291.353	-0.0494294
325.259	291.689	-0.0495649
303.839	291.386	-0.049085
303.507	291.852	-0.0491059
303.33	291.249	-0.0490944
302.848	291.575	-0.0491393
282.199	291.648	-0.0496962
281.873	292.144	-0.0496135
281.734	291.389	-0.0495632
281.245	291.742	-0.0494636
303.848	286.898	-0.0488188
303.507	287.354	-0.0489004
303.33	286.753	-0.0488135
302.85	287.084	-0.0489046
324.657	284.239	-0.04865
324.931	284.854	-0.0486907
323.649	284.33	-0.048858
301.975	284.406	-0.0486127
301.707	285.091	-0.0487113
300.951	285.163	-0.0487637
297.706	285.148	-0.0489932
296.92	285.083	-0.0490587
297.707	284.415	-0.0489113
296.625	284.395	-0.0490035
288.622	285.14	-0.0496924
287.85	285.09	-0.0496892
287.565	284.415	-0.0495778
280.016	327.96	-0.0486618
280.69	328.247	-0.0487506
280.741	329.016	-0.048643
280.018	300.96	-0.0483693
280.667	301.257	-0.0484412
280.737	302.022	-0.0483671
309.859	332.084	-0.0488629
309.548	331.486	-0.0488832
310.443	331.33	-0.0490188
309.883	331.031	-0.0489912
310.884	331.982	-0.0489906
327.688	329.058	-0.0494349
327.086	329.373	-0.0494761
326.938	328.488	-0.0496544
326.638	329.046	-0.0496245
327.592	328.051	-0.0495964
327.695	302.086	-0.0485766
327.097	302.397	-0.0486273
326.941	301.502	-0.0487017
326.642	302.062	-0.0487173
327.593	301.061	-0.0486348
326.862	309.403	-0.0486078
280.691	309.402	-0.0478893
326.907	300.496	-0.0487289
280.692	300.406	-0.04851
326.878	313.877	-0.0488679
280.677	313.877	-0.04803
326.907	327.491	-0.049759
280.682	327.414	-0.0488233
326.83	318.388	-0.0493409
280.726	318.388	-0.0484552
311.449	331.297	-0.0491132
320.557	331.219	-0.0500048
302.547	331.254	-0.04838
300.488	331.268	-0.0483588
298.141	331.303	-0.0484035
296.012	331.275	-0.0485353
293.496	331.208	-0.0487434
287.033	331.22	-0.0491083
284.495	331.212	-0.0489188
326.829	291.388	-0.0492282
280.726	291.388	-0.0493369
280.024	284.413	-0.0481967
327.549	284.396	-0.0480299
296.509	305.615	-0.0487954
297.007	305.21	-0.048809
297.029	305.806	-0.0488052
297.548	305.618	-0.0488077
292.009	305.615	-0.0487739
292.507	305.21	-0.048779
292.529	305.806	-0.0487661
293.048	305.618	-0.0487596
287.509	305.615	-0.0488257
288.007	305.21	-0.0488471
288.029	305.806	-0.0488252
288.548	305.618	-0.0488246
283.054	305.578	-0.0484795
283.546	305.235	-0.0485684
283.53	305.806	-0.0485373
284.039	305.639	-0.0486028
305.571	306.44	-0.0489338
305.253	305.973	-0.0489192
296.529	310.146	-0.0487105
297.019	309.771	-0.0487226
297.033	310.308	-0.0487265
297.545	310.14	-0.0487297
292.029	310.146	-0.0486647
292.519	309.771	-0.0486611
292.533	310.308	-0.0486643
293.045	310.14	-0.0486541
287.529	310.146	-0.0487007
288.019	309.771	-0.0487046
288.033	310.308	-0.0487108
288.545	310.14	-0.0487024
283.019	310.129	-0.0483296
283.529	309.76	-0.0483999
283.515	310.317	-0.048407
284.032	310.145	-0.0484641
305.571	310.94	-0.0489561
305.253	310.473	-0.0489408
296.529	314.646	-0.048697
297.019	314.271	-0.0486998
297.033	314.808	-0.0487124
297.545	314.64	-0.0487099
292.029	314.646	-0.0486994
292.519	314.271	-0.0486767
292.533	314.808	-0.048698
293.045	314.64	-0.0486755
287.529	314.646	-0.0488232
288.019	314.271	-0.048795
288.033	314.808	-0.0488316
288.545	314.64	-0.048802
283.019	314.633	-0.0485155
283.528	314.261	-0.0485544
283.515	314.829	-0.0486033
284.032	314.646	-0.0486422
283.024	296.592	-0.0494401
283.535	296.229	-0.0495636
283.519	296.799	-0.0494917
284.032	296.627	-0.0495749
296.509	323.615	-0.0490219
297.007	323.21	-0.0489806
297.029	323.806	-0.0490177
297.548	323.618	-0.0489857
292.009	323.615	-0.0493493
292.507	323.21	-0.0492639
292.529	323.806	-0.0493199
293.048	323.618	-0.0492483
287.509	323.615	-0.0497232
288.007	323.21	-0.0496587
288.029	323.806	-0.0497186
288.548	323.618	-0.049661
283.021	323.613	-0.049414
283.532	323.23	-0.0494673
283.539	323.81	-0.0495125
284.048	323.633	-0.0495665
305.571	324.44	-0.0491301
305.253	323.973	-0.0491002
315.134	327.678	-0.0500605
315.193	328.245	-0.050036
314.668	328.023	-0.0499771
314.789	328.453	-0.0499692
324.116	327.707	-0.0503115
324.147	328.277	-0.0502478
323.664	328.032	-0.0503499
323.769	328.467	-0.0502883
296.554	328.171	-0.0489481
297.032	327.769	-0.0489522
297.071	328.329	-0.0489082
297.563	328.1	-0.0488962
292.06	328.172	-0.0493373
292.537	327.77	-0.0493221
292.575	328.323	-0.0492776
293.068	328.1	-0.049241
287.557	328.17	-0.04965
288.035	327.769	-0.0496807
288.077	328.326	-0.0496228
288.569	328.1	-0.0496212
283.048	328.144	-0.0492545
283.549	327.752	-0.0493904
283.572	328.309	-0.0493295
284.068	328.095	-0.0494295
305.571	315.44	-0.0489461
305.253	314.973	-0.0489307
305.571	328.919	-0.0489049
305.252	328.468	-0.0489288
306.239	287.651	-0.0489216
306.743	288.049	-0.048955
306.243	288.196	-0.0489777
305.797	288.039	-0.048965
296.479	300.894	-0.0489533
296.932	301.302	-0.0489407
296.316	301.558	-0.048928
296.752	301.982	-0.048909
291.979	300.894	-0.0490255
292.432	301.302	-0.0489887
291.816	301.558	-0.0489869
292.252	301.982	-0.0489449
287.479	300.894	-0.0491901
287.932	301.302	-0.0491467
287.316	301.558	-0.0491249
287.751	301.981	-0.0490806
296.479	296.394	-0.0491808
296.932	296.803	-0.0491418
296.316	297.058	-0.0491407
296.752	297.483	-0.0490981
291.979	296.394	-0.0494452
292.432	296.802	-0.0493706
291.816	297.058	-0.0493813
292.252	297.482	-0.0493031
287.479	296.394	-0.0497609
287.932	296.802	-0.049688
287.316	297.058	-0.0496696
287.752	297.482	-0.0495935
296.516	318.827	-0.0487683
296.935	319.3	-0.0487908
296.316	319.558	-0.0488022
296.752	319.982	-0.0488163
292.016	318.827	-0.0489157
292.435	319.299	-0.0489345
291.816	319.558	-0.048991
292.252	319.982	-0.0489972
287.516	318.827	-0.0491905
287.929	319.314	-0.0492352
287.316	319.558	-0.0492845
287.751	319.98	-0.0493174
296.479	291.894	-0.0495178
296.932	292.303	-0.0494666
296.316	292.558	-0.0494884
296.752	292.983	-0.0494264
291.979	291.894	-0.049946
292.432	292.302	-0.0498672
291.816	292.558	-0.0499031
292.252	292.982	-0.0498118
287.479	291.894	-0.0503013
287.932	292.302	-0.0502578
287.316	292.558	-0.0502502
287.751	292.981	-0.0501927
301.038	287.521	-0.0490866
301.426	287.968	-0.0491122
300.818	288.083	-0.0491519
301.24	288.54	-0.0491604
296.509	287.365	-0.049404
296.938	287.828	-0.0494152
296.315	288.057	-0.0494853
296.753	288.484	-0.0494757
291.979	287.457	-0.0498668
292.44	287.831	-0.0498633
291.836	288.052	-0.0499399
292.256	288.494	-0.0499298
287.508	287.366	-0.0500874
287.939	287.818	-0.050157
287.315	288.058	-0.0501814
287.752	288.483	-0.0502321
301.027	301.652	-0.0489161
301.519	301.608	-0.0489229
301.948	301.838	-0.0489061
301.896	302.553	-0.0488794
301.116	305.508	-0.0488625
301.365	305.964	-0.0488691
300.696	306.102	-0.0488402
301.33	306.514	-0.0488535
323.799	297.666	-0.0494044
324.457	297.75	-0.0493188
324.616	297.258	-0.049355
301.027	297.152	-0.049007
301.519	297.109	-0.049004
301.948	297.338	-0.0489742
301.895	298.056	-0.0489352
283.681	300.493	-0.0490313
283.515	300.865	-0.0489732
283.2	300.451	-0.048966
283.012	301.111	-0.0488684
301.153	309.994	-0.048828
301.38	310.453	-0.0488375
300.71	310.587	-0.0487994
301.331	311.013	-0.0488217
301.027	292.652	-0.0492238
301.519	292.609	-0.0492115
301.948	292.838	-0.0491747
301.895	293.556	-0.0491283
301.028	319.654	-0.0488392
301.519	319.609	-0.0488563
301.948	319.838	-0.0488626
301.896	320.553	-0.0488667
301.116	323.508	-0.0489627
301.365	323.964	-0.0489825
300.696	324.102	-0.048964
301.33	324.514	-0.0489808
301.153	314.494	-0.0488009
301.38	314.953	-0.0488123
300.71	315.087	-0.0487746
301.331	315.513	-0.0487985
283.681	318.493	-0.0489903
283.515	318.865	-0.0490203
283.2	318.451	-0.0489171
283.012	319.113	-0.0489736
301.161	327.977	-0.0488376
301.384	328.447	-0.0487968
300.714	328.583	-0.0487639
301.336	329.003	-0.0487238
323.839	288.674	-0.0496432
324.124	288.245	-0.0495473
324.514	288.617	-0.0495122
324.484	287.986	-0.0494388
283.681	291.493	-0.0500214
283.515	291.865	-0.0499864
283.2	291.452	-0.0499253
283.012	292.111	-0.0498748
325.527	305.247	-0.0488031
325.355	306.003	-0.0488423
324.839	305.531	-0.0489259
300.455	305.484	-0.0488395
295.955	305.484	-0.0487779
295.779	301.626	-0.0489174
291.455	305.484	-0.0487763
291.279	301.626	-0.0489918
286.955	305.484	-0.0488114
286.775	301.626	-0.0491069
283.024	304.918	-0.0485092
300.513	309.908	-0.0487933
295.973	309.961	-0.0486846
291.473	309.961	-0.0486588
286.973	309.961	-0.0486752
282.99	309.487	-0.0483144
282.46	309.935	-0.0482298
305.538	300.418	-0.0488686
305.681	301.042	-0.0488909
305.032	300.894	-0.0488709
305.266	301.469	-0.0488896
300.487	300.573	-0.0489091
301.095	300.533	-0.048917
300.769	301.121	-0.0489217
301.33	301.124	-0.048925
300.292	301.124	-0.0489153
295.779	297.126	-0.0491457
291.279	297.126	-0.0494028
286.779	297.126	-0.0496594
282.443	301.017	-0.0487853
282.465	301.593	-0.0487233
281.928	302.02	-0.0485699
300.513	314.408	-0.048765
295.973	314.461	-0.0486718
291.473	314.461	-0.0486945
286.973	314.461	-0.0487974
282.989	313.987	-0.048453
282.459	314.437	-0.048405
282.479	310.582	-0.0482389
281.898	310.971	-0.048129
305.538	295.918	-0.0489375
305.681	296.542	-0.0489311
305.032	296.394	-0.0489256
305.266	296.969	-0.0489182
300.487	296.073	-0.0490472
301.095	296.033	-0.0490428
300.769	296.621	-0.0490335
301.33	296.624	-0.0490248
300.292	296.624	-0.0490377
295.779	292.626	-0.0495139
291.279	292.626	-0.0499422
286.774	292.626	-0.0502393
283.015	295.924	-0.0495144
325.527	323.195	-0.050094
325.387	323.983	-0.050187
324.87	323.505	-0.0502537
300.455	323.484	-0.048943
295.955	323.484	-0.0490261
295.78	319.628	-0.0488057
291.455	323.484	-0.0493794
291.28	319.628	-0.0490264
286.955	323.484	-0.0497165
286.776	319.626	-0.0492968
282.437	323.481	-0.0492922
300.515	327.903	-0.0488289
295.973	327.962	-0.0489917
291.473	327.962	-0.0494009
286.973	327.962	-0.0496661
282.991	327.484	-0.0493126
282.458	327.938	-0.0491574
305.538	318.418	-0.0489256
305.681	319.042	-0.048962
305.032	318.894	-0.0489133
305.266	319.469	-0.0489527
300.514	318.6	-0.0487741
301.113	318.573	-0.0488011
300.771	319.127	-0.0488144
301.333	319.137	-0.0488348
300.296	319.117	-0.048795
282.443	319.016	-0.0488679
282.465	319.596	-0.048937
281.913	320.024	-0.0488731
282.478	315.089	-0.0484616
281.902	315.522	-0.048387
282.483	328.594	-0.0490741
281.918	329.033	-0.0488774
305.538	291.418	-0.0490911
305.681	292.042	-0.0490982
305.032	291.894	-0.049092
305.266	292.469	-0.0490895
324.907	288.16	-0.0493746
325.161	288.628	-0.0493743
300.484	291.574	-0.0492609
301.094	291.534	-0.0492423
300.767	292.121	-0.0492522
301.329	292.124	-0.0492323
300.292	292.124	-0.049267
300.279	288.153	-0.0491825
295.782	288.132	-0.0495329
291.277	288.141	-0.0499927
286.776	288.127	-0.0501677
282.444	292.015	-0.0497546
282.466	292.594	-0.0497314
281.921	293.006	-0.0495727
305.529	286.854	-0.0488145
305.668	287.487	-0.0489029
305.031	287.367	-0.0488817
305.244	287.94	-0.0489514
306.165	287.074	-0.0488475
306.777	287.387	-0.0488817
306.72	286.703	-0.048786
301.632	287.448	-0.0490473
301.816	287.001	-0.0489791
302.279	287.398	-0.0489918
302.231	286.739	-0.0489065
298.727	305.207	-0.0487913
298.7	305.858	-0.0487945
298.137	305.404	-0.0488021
298.075	306.096	-0.0487926
294.227	305.206	-0.0487368
294.199	305.858	-0.0487309
293.637	305.404	-0.0487476
293.575	306.096	-0.0487302
289.727	305.206	-0.0487927
289.699	305.858	-0.0487777
289.137	305.404	-0.0488125
289.075	306.096	-0.0487868
285.226	305.207	-0.0487132
285.195	305.861	-0.0486841
284.636	305.409	-0.0486664
284.56	306.105	-0.0486224
302.72	305.842	-0.0488611
303.166	306.206	-0.0488582
302.614	306.638	-0.048846
303.288	306.712	-0.0488395
298.729	309.703	-0.0487191
298.702	310.356	-0.048729
298.14	309.907	-0.0487263
298.076	310.596	-0.0487245
294.23	309.697	-0.0486261
294.202	310.352	-0.0486351
293.641	309.905	-0.0486388
293.576	310.596	-0.0486384
289.73	309.697	-0.0486567
289.702	310.352	-0.0486681
289.141	309.905	-0.0486823
289.076	310.596	-0.0486868
285.228	309.698	-0.0485523
285.198	310.355	-0.0485637
284.635	309.909	-0.0485157
284.559	310.605	-0.0485164
308.487	301.305	-0.0488597
309.18	300.959	-0.0488641
308.648	300.686	-0.0488373
312.987	301.305	-0.0489061
313.68	300.959	-0.0489244
313.148	300.686	-0.0488912
317.487	301.305	-0.0491043
318.18	300.959	-0.0491569
317.648	300.686	-0.049109
321.987	301.305	-0.049245
322.679	300.958	-0.0492347
322.147	300.685	-0.0492553
302.721	310.342	-0.0488482
303.166	310.706	-0.0488508
302.614	311.137	-0.0488305
303.288	311.212	-0.0488324
298.729	314.203	-0.0486898
298.702	314.856	-0.0487069
298.14	314.407	-0.0487008
298.076	315.096	-0.0487083
294.23	314.197	-0.0486216
294.202	314.852	-0.0486491
293.641	314.405	-0.0486461
293.576	315.096	-0.0486677
289.73	314.197	-0.0487093
289.702	314.852	-0.0487521
289.141	314.405	-0.0487566
289.076	315.096	-0.0487977
285.228	314.198	-0.0486836
285.198	314.855	-0.0487423
284.635	314.409	-0.0486697
284.56	315.106	-0.0487218
308.487	296.805	-0.0488783
309.18	296.459	-0.0489006
308.648	296.186	-0.0488879
312.987	296.805	-0.0489836
313.68	296.459	-0.0490475
313.148	296.186	-0.0490114
317.487	296.805	-0.0493299
318.18	296.459	-0.0494298
317.648	296.186	-0.0493856
321.987	296.805	-0.049577
322.684	296.475	-0.0495861
322.148	296.187	-0.0496227
298.727	323.207	-0.0489096
298.7	323.858	-0.0489492
298.137	323.404	-0.0489468
298.075	324.096	-0.0489792
294.227	323.206	-0.0490793
294.199	323.858	-0.0491453
293.637	323.404	-0.0491626
293.575	324.096	-0.0492237
289.727	323.206	-0.0494847
289.699	323.858	-0.0495655
289.137	323.404	-0.0495777
289.075	324.096	-0.0496494
285.228	323.206	-0.0496196
285.2	323.858	-0.0496817
284.64	323.407	-0.0496039
284.576	324.096	-0.0496481
302.72	323.842	-0.0489839
303.166	324.206	-0.0489958
302.614	324.638	-0.0489831
303.288	324.712	-0.0489885
298.729	327.7	-0.0488506
298.701	328.346	-0.0488056
298.143	327.89	-0.0488734
298.078	328.556	-0.048818
294.231	327.694	-0.0491268
294.202	328.342	-0.0490889
293.656	327.885	-0.0491848
293.583	328.557	-0.0491368
289.73	327.697	-0.0495528
289.702	328.345	-0.049502
289.155	327.884	-0.0495941
289.085	328.558	-0.0495286
285.231	327.694	-0.0495912
285.202	328.342	-0.0495149
284.647	327.89	-0.0495204
284.583	328.558	-0.0494254
308.487	319.305	-0.0490585
309.18	318.959	-0.0490844
308.648	318.686	-0.0490289
312.987	319.305	-0.0493241
313.68	318.959	-0.0493603
313.148	318.686	-0.0492803
317.487	319.305	-0.0497546
318.18	318.959	-0.0497894
317.648	318.686	-0.0496853
321.987	319.305	-0.0500308
322.679	318.958	-0.0499613
322.147	318.685	-0.0499284
302.721	314.842	-0.0488261
303.166	315.206	-0.0488306
302.614	315.637	-0.0488092
303.288	315.712	-0.0488134
302.722	328.331	-0.0488123
303.161	328.69	-0.04878
302.621	329.075	-0.0487181
303.276	329.201	-0.0487066
308.487	292.305	-0.0490699
309.18	291.959	-0.0491019
308.648	291.686	-0.0490776
312.987	292.305	-0.049285
313.68	291.959	-0.0493719
313.148	291.686	-0.0493199
317.487	292.305	-0.0497486
318.18	291.959	-0.0498466
317.648	291.686	-0.0497935
321.987	292.305	-0.0499682
322.678	291.958	-0.0499395
322.147	291.685	-0.0499732
308.459	287.791	-0.0489373
309.182	287.448	-0.0489334
308.653	287.183	-0.048867
312.959	287.791	-0.0492155
313.687	287.454	-0.049252
313.145	287.178	-0.0491532
317.459	287.791	-0.0496492
318.183	287.454	-0.0496628
317.643	287.178	-0.0495687
321.959	287.791	-0.0497233
322.673	287.433	-0.0495956
322.163	287.187	-0.0495899
280.57	305.333	-0.048059
281.229	305.373	-0.0481645
280.91	306.06	-0.0480688
281.564	305.959	-0.0481916
280.598	296.367	-0.0490021
281.235	296.374	-0.0491171
280.931	297.066	-0.0489786
281.548	296.935	-0.0491138
280.598	287.366	-0.0489277
281.259	287.369	-0.0490842
280.939	288.068	-0.0491293
281.573	287.948	-0.0492692
283.05	331.353	-0.0486946
282.997	330.727	-0.0487913
283.677	331.059	-0.0488542
283.516	330.512	-0.0489292
292.07	331.326	-0.0488844
292	330.717	-0.0489774
292.681	331.048	-0.048872
292.517	330.501	-0.048972
306.017	330.352	-0.0487211
306.627	330.702	-0.0487101
305.923	331.038	-0.048613
306.612	331.375	-0.0486216
315.083	330.455	-0.0497188
315.621	330.697	-0.0497435
314.906	331.03	-0.0496108
315.578	331.347	-0.0496502
324.083	330.454	-0.0498682
324.619	330.697	-0.0497239
323.905	331.03	-0.0497894
324.578	331.347	-0.0496203
326.016	305.932	-0.0487299
326.288	305.353	-0.0486815
326.645	306.06	-0.0486275
326.985	305.333	-0.04858
326.013	296.905	-0.0491503
326.307	296.324	-0.0491403
326.641	297.04	-0.0490362
326.957	296.367	-0.0490388
325.978	287.942	-0.0490909
326.289	287.346	-0.0489057
326.614	288.063	-0.0489701
326.957	287.366	-0.0487712
307.799	301.785	-0.048859
308.037	302.405	-0.0488289
312.299	301.785	-0.0488949
312.537	302.405	-0.0488691
316.799	301.785	-0.0490582
317.037	302.405	-0.0490367
321.299	301.785	-0.0492371
321.537	302.405	-0.0491833
307.799	297.285	-0.0488584
308.037	297.905	-0.0488066
312.299	297.285	-0.0489283
312.537	297.905	-0.0488782
316.799	297.285	-0.0492254
317.037	297.905	-0.0491631
321.299	297.285	-0.0495307
321.537	297.905	-0.0494383
307.799	292.785	-0.0490396
308.037	293.405	-0.0489799
312.299	292.785	-0.0491985
312.537	293.405	-0.0491335
316.799	292.785	-0.0496321
317.037	293.405	-0.0495618
321.299	292.785	-0.0499542
321.537	293.405	-0.0498704
307.799	319.785	-0.0490415
308.037	320.405	-0.0490456
312.299	319.785	-0.0493012
312.537	320.405	-0.0493279
316.799	319.785	-0.0497336
317.037	320.405	-0.049796
321.299	319.785	-0.0500987
321.537	320.405	-0.050156
307.819	288.288	-0.048963
308.037	288.905	-0.0489828
312.336	288.288	-0.0492031
312.549	288.911	-0.0492327
316.836	288.289	-0.0496467
317.049	288.911	-0.0496898
321.338	288.289	-0.0498345
321.549	288.911	-0.0498758
304.757	303.136	-0.0488149
305.109	303.721	-0.0488288
304.735	304.209	-0.0488194
307.252	304.546	-0.0488652
307.214	304.034	-0.0488439
306.932	303.563	-0.048844
307.305	303.154	-0.048832
307.482	302.566	-0.0488387
308.845	302.676	-0.0488406
309.303	302.789	-0.0488572
309.341	303.294	-0.0488514
309.621	303.741	-0.0488707
309.222	304.203	-0.0488656
311.752	304.546	-0.0489136
311.714	304.034	-0.0488886
311.432	303.563	-0.0488843
311.805	303.154	-0.0488707
311.982	302.566	-0.0488748
313.345	302.676	-0.0488887
313.803	302.789	-0.0489087
313.841	303.294	-0.0489027
314.121	303.741	-0.0489266
313.722	304.203	-0.0489158
316.252	304.546	-0.0490326
316.214	304.034	-0.0490106
315.932	303.563	-0.0489991
316.305	303.154	-0.049003
316.482	302.566	-0.0490184
317.845	302.676	-0.0490793
318.303	302.789	-0.049112
318.341	303.294	-0.0491001
318.621	303.741	-0.0491217
318.222	304.203	-0.0490987
320.752	304.546	-0.0491796
320.714	304.034	-0.0491696
320.432	303.563	-0.0491784
320.805	303.154	-0.0491758
320.982	302.566	-0.0491955
322.345	302.676	-0.0491502
322.803	302.789	-0.0491316
322.84	303.293	-0.0491062
323.116	303.737	-0.0490854
322.712	304.195	-0.0491006
325.963	304.76	-0.0487165
325.294	304.54	-0.0488268
325.218	304.034	-0.0488379
324.932	303.563	-0.0488931
325.274	303.172	-0.0488518
325.389	302.641	-0.0488626
325.881	302.582	-0.0487868
326.246	302.277	-0.048754
326.614	302.558	-0.0486825
304.256	304.633	-0.0488158
303.641	304.989	-0.0488217
303.268	304.638	-0.048812
302.753	304.485	-0.0488199
302.721	304	-0.0488109
303.34	302.595	-0.0488156
303.778	302.218	-0.0488271
304.301	302.685	-0.0488127
302.472	303.527	-0.0488221
302.793	303.186	-0.0488171
302.837	302.685	-0.0488319
299.287	305.001	-0.0487823
298.747	304.647	-0.0487715
300.329	304.045	-0.0488033
300.281	303.274	-0.0488146
300.605	303.658	-0.0488192
299.697	302.664	-0.0488216
300.211	302.789	-0.048831
298.852	302.628	-0.0488196
299.262	302.326	-0.0488371
298.3	304.146	-0.0487756
297.975	303.563	-0.0487983
298.286	303.197	-0.048804
298.339	302.686	-0.0488304
294.787	305.001	-0.0487292
294.247	304.647	-0.0487256
295.826	304.055	-0.048766
295.863	303.292	-0.0487921
296.127	303.68	-0.0487905
294.353	302.623	-0.0488089
294.765	302.303	-0.0488335
293.8	304.146	-0.0487384
293.475	303.563	-0.0487746
293.786	303.197	-0.0487826
293.839	302.686	-0.0488191
290.287	305.001	-0.0487749
289.747	304.647	-0.0487921
291.326	304.055	-0.0487952
291.363	303.292	-0.0488337
291.627	303.68	-0.0488158
289.853	302.623	-0.0489105
290.265	302.303	-0.0489297
289.3	304.146	-0.0488257
288.975	303.563	-0.0488772
289.286	303.197	-0.0488884
289.339	302.686	-0.0489338
285.787	305.001	-0.0487492
285.247	304.647	-0.0487268
286.826	304.055	-0.0488537
286.863	303.292	-0.0489103
287.127	303.68	-0.0488945
285.347	302.618	-0.048896
285.78	302.298	-0.0489609
284.8	304.146	-0.0487249
284.476	303.576	-0.0487482
284.785	303.203	-0.0488032
284.839	302.686	-0.0488634
281.553	304.786	-0.04824
281.708	302.6	-0.0484506
282.227	302.646	-0.0485411
280.871	302.587	-0.0483123
281.298	302.279	-0.0484209
304.757	307.636	-0.048841
305.109	308.221	-0.0488597
304.735	308.709	-0.0488422
307.252	309.046	-0.0489238
307.214	308.534	-0.0489053
306.932	308.063	-0.0489041
307.294	307.674	-0.0488993
307.513	307.172	-0.0489064
307.966	307.155	-0.0489079
308.42	306.871	-0.0489198
308.781	307.177	-0.0489217
309.303	307.289	-0.0489438
309.341	307.794	-0.0489386
309.621	308.241	-0.0489586
309.222	308.703	-0.0489474
311.752	309.046	-0.0490114
311.714	308.534	-0.0489884
311.432	308.063	-0.0489845
311.794	307.674	-0.0489734
312.013	307.172	-0.0489743
312.466	307.155	-0.0489735
312.92	306.871	-0.0489811
313.281	307.177	-0.0489848
313.803	307.289	-0.0490058
313.841	307.794	-0.0490038
314.121	308.241	-0.0490289
313.722	308.703	-0.049019
316.252	309.046	-0.0491331
316.214	308.534	-0.0491074
315.932	308.063	-0.0490935
316.294	307.674	-0.0490909
316.513	307.172	-0.0490954
316.966	307.155	-0.0491065
317.42	306.871	-0.0491248
317.781	307.177	-0.0491365
318.303	307.289	-0.0491676
318.341	307.794	-0.0491672
318.621	308.241	-0.0491943
318.222	308.703	-0.0491835
320.752	309.046	-0.0492484
320.714	308.534	-0.0492242
320.432	308.063	-0.0492231
320.794	307.674	-0.0492038
321.013	307.172	-0.0491973
321.466	307.155	-0.0491785
321.92	306.871	-0.0491619
322.281	307.177	-0.0491389
322.803	307.289	-0.0491142
322.841	307.794	-0.0491089
323.121	308.241	-0.0491007
322.722	308.703	-0.0491366
325.217	309.055	-0.0488645
325.214	308.534	-0.0488406
324.932	308.063	-0.0488794
325.294	307.669	-0.0488149
325.442	307.148	-0.0487979
325.866	307.071	-0.0487241
326.217	306.656	-0.0486764
326.805	306.893	-0.048574
304.256	309.133	-0.0488292
303.641	309.489	-0.0488241
303.268	309.138	-0.0488089
302.753	308.985	-0.0488081
302.724	308.501	-0.0487983
303.414	307.17	-0.0488178
303.821	306.896	-0.048831
304.305	307.227	-0.0488317
302.485	308.032	-0.0488029
302.814	307.683	-0.0488043
302.948	307.198	-0.0488174
299.288	309.483	-0.0487143
298.747	309.147	-0.0486943
300.309	307.666	-0.0487542
299.709	307.138	-0.0487457
300.21	307.201	-0.0487689
298.866	307.131	-0.0487283
299.288	306.844	-0.0487496
298.3	308.646	-0.048688
297.978	308.071	-0.0487002
298.299	307.699	-0.0487078
298.373	307.179	-0.0487307
294.789	309.467	-0.048617
294.247	309.147	-0.0486035
295.81	307.662	-0.0486629
295.205	307.144	-0.0486625
295.697	307.196	-0.0486823
294.366	307.131	-0.0486495
294.788	306.844	-0.0486714
293.8	308.646	-0.048602
293.478	308.071	-0.0486219
293.799	307.699	-0.0486265
293.873	307.179	-0.048653
290.289	309.467	-0.0486335
289.747	309.147	-0.0486351
291.31	307.662	-0.0486523
290.705	307.144	-0.0486735
291.197	307.196	-0.0486769
289.866	307.131	-0.0486838
290.288	306.844	-0.0486962
289.3	308.646	-0.0486456
288.978	308.071	-0.0486702
289.299	307.699	-0.0486726
289.373	307.179	-0.0486994
285.789	309.468	-0.0485782
285.247	309.147	-0.0485334
286.81	307.662	-0.048663
286.205	307.144	-0.0486524
286.697	307.196	-0.0486837
285.366	307.131	-0.0485979
285.788	306.844	-0.048647
284.8	308.646	-0.0485003
284.48	308.074	-0.0484899
284.798	307.7	-0.0485293
284.873	307.179	-0.0485647
281.747	307.084	-0.0481271
282.266	307.14	-0.0482229
280.751	306.893	-0.0479668
281.354	306.672	-0.0480897
304.757	298.636	-0.048816
305.114	299.22	-0.0488184
304.752	299.708	-0.048812
308.787	300.124	-0.0488053
308.161	300.467	-0.0488168
307.782	300.17	-0.0488063
307.252	300.046	-0.0488171
307.214	299.534	-0.0488017
306.932	299.063	-0.0488098
307.305	298.654	-0.0488008
307.482	298.066	-0.0488155
308.845	298.176	-0.0488073
309.303	298.289	-0.0488226
309.345	298.786	-0.0488054
309.619	299.25	-0.0488142
309.234	299.702	-0.0488034
313.287	300.124	-0.0488685
312.661	300.467	-0.0488633
312.282	300.17	-0.048848
311.752	300.046	-0.0488494
311.714	299.534	-0.048836
311.432	299.063	-0.0488401
311.805	298.654	-0.048843
311.982	298.066	-0.0488673
313.345	298.176	-0.048903
313.803	298.289	-0.0489312
313.845	298.786	-0.0489043
314.119	299.25	-0.0489139
313.734	299.702	-0.0488817
317.787	300.124	-0.0491064
317.161	300.467	-0.0490665
316.782	300.17	-0.0490419
316.252	300.046	-0.0490233
316.214	299.534	-0.0490225
315.932	299.063	-0.0490282
316.305	298.654	-0.0490625
316.482	298.066	-0.0491194
317.845	298.176	-0.0492107
318.303	298.289	-0.0492509
318.345	298.786	-0.0492075
318.619	299.25	-0.0492098
318.234	299.702	-0.0491509
322.287	300.124	-0.0492582
321.661	300.467	-0.0492651
321.282	300.17	-0.0492777
320.752	300.046	-0.0492902
320.714	299.534	-0.0493083
320.432	299.063	-0.0493373
320.805	298.654	-0.0493694
320.982	298.066	-0.0494307
322.345	298.176	-0.0493991
322.803	298.289	-0.0493785
322.845	298.786	-0.0493237
323.12	299.247	-0.0492786
322.733	299.701	-0.0492631
325.239	300.04	-0.0490023
325.214	299.534	-0.0490275
324.932	299.063	-0.0491044
325.274	298.672	-0.0490811
325.388	298.14	-0.0491174
325.868	298.073	-0.0490419
326.22	297.65	-0.0490325
326.808	297.889	-0.0489123
304.309	300.147	-0.0488166
302.752	300.046	-0.0488488
302.723	299.5	-0.0488407
303.34	298.095	-0.0488446
[truncated: 4,673 more rows]
