# Supplementary material for: Optimization Method of Reducing the Differential Settlements of Piled Raft Foundations Based on Pile‐to‐Pile Interaction Theory
Source: Hindawi journal article supplement (doi:10.1155/2020/1521876), 2020-01-01
Supplement: f1 [file 1521876.f1.zip › Database/CASE-2-Figure 13-14.xlsx]

## Sheet: Figure-13-a-b
300.289	308.936	-0.134646
300.838	308.878	-0.134785
300.407	309.377	-0.134673
301.011	309.448	-0.134812
295.789	308.936	-0.133173
296.324	308.918	-0.13344
295.907	309.376	-0.133221
296.449	309.53	-0.133471
291.289	308.936	-0.130274
291.824	308.918	-0.130744
291.407	309.376	-0.130361
291.949	309.53	-0.130811
286.789	308.936	-0.1254
287.324	308.918	-0.12612
286.907	309.376	-0.125536
287.449	309.53	-0.126237
300.289	313.436	-0.133979
300.838	313.378	-0.13414
300.407	313.877	-0.133918
301.011	313.948	-0.134055
295.789	313.436	-0.132385
296.324	313.418	-0.132671
295.907	313.876	-0.132343
296.449	314.03	-0.132576
291.289	313.436	-0.129351
291.824	313.418	-0.12984
291.407	313.876	-0.129335
291.949	314.03	-0.129765
286.789	313.436	-0.124344
287.324	313.418	-0.125083
286.907	313.876	-0.124363
287.449	314.03	-0.125038
282.289	322.438	-0.110194
282.824	322.418	-0.11116
282.408	322.876	-0.109864
282.947	323.035	-0.110609
300.289	326.936	-0.123266
300.838	326.878	-0.123536
300.407	327.377	-0.122691
301.013	327.444	-0.122796
295.789	326.936	-0.121054
296.324	326.918	-0.121442
295.907	327.376	-0.120501
296.455	327.533	-0.120632
291.289	326.936	-0.117133
291.824	326.918	-0.117748
291.407	327.376	-0.116602
291.961	327.538	-0.116955
286.789	326.936	-0.111181
287.324	326.918	-0.11204
286.907	327.376	-0.110673
287.456	327.533	-0.111266
282.774	302.723	-0.118867
283.21	303.128	-0.119698
282.503	303.191	-0.118518
282.758	303.709	-0.119086
300.728	307.947	-0.134768
301.296	308.242	-0.134891
300.503	308.473	-0.134697
296.228	307.947	-0.133421
296.768	308.337	-0.133658
296.003	308.473	-0.133285
291.728	307.947	-0.130702
292.268	308.337	-0.131135
291.503	308.473	-0.130475
287.228	307.947	-0.126038
287.768	308.337	-0.126726
287.003	308.473	-0.125702
282.803	307.214	-0.119635
283.231	307.609	-0.120308
282.503	307.691	-0.119087
282.761	308.212	-0.119487
300.728	312.447	-0.134301
301.296	312.742	-0.134381
300.503	312.973	-0.134125
296.228	312.447	-0.132846
296.768	312.837	-0.133019
296.003	312.973	-0.132599
291.728	312.447	-0.130017
292.268	312.837	-0.130376
291.503	312.973	-0.129665
287.228	312.447	-0.125254
287.768	312.837	-0.125853
287.003	312.973	-0.124776
282.789	311.707	-0.118963
283.229	312.108	-0.119547
282.503	312.191	-0.118295
282.761	312.712	-0.118547
282.774	293.722	-0.11186
283.21	294.128	-0.113132
282.503	294.191	-0.111903
282.758	294.709	-0.112973
282.728	321.447	-0.112125
283.262	321.842	-0.112616
282.503	321.973	-0.111107
300.728	325.947	-0.124759
301.296	326.242	-0.124546
300.503	326.473	-0.12397
296.228	325.947	-0.122735
296.768	326.337	-0.122541
296.003	326.473	-0.121849
291.728	325.947	-0.119065
292.268	326.337	-0.119069
291.503	326.473	-0.118049
287.228	325.947	-0.113381
287.768	326.337	-0.11361
287.003	326.473	-0.112224
282.808	325.223	-0.107197
283.232	325.61	-0.107352
282.503	325.691	-0.105871
282.761	326.212	-0.105521
288.744	330.689	-0.107839
288.343	330.051	-0.108335
289.031	330.172	-0.10907
288.795	329.688	-0.10958
295.341	301.966	-0.132422
296.004	302.161	-0.132798
295.372	302.535	-0.132535
295.911	302.815	-0.132866
290.841	301.966	-0.129284
291.504	302.161	-0.129937
290.872	302.535	-0.129428
291.411	302.815	-0.129985
286.329	301.965	-0.124043
287	302.153	-0.125031
286.372	302.535	-0.124249
286.911	302.815	-0.125072
295.341	297.466	-0.130462
296.004	297.661	-0.130928
295.372	298.035	-0.13078
295.906	298.32	-0.131218
290.841	297.466	-0.127094
291.504	297.661	-0.127862
290.872	298.035	-0.127461
291.406	298.32	-0.128147
286.341	297.466	-0.12155
287.004	297.661	-0.122658
286.372	298.035	-0.121981
286.906	298.32	-0.122946
282.728	298.947	-0.116812
283.293	299.349	-0.118067
282.505	299.522	-0.116804
282.919	299.983	-0.117837
295.341	292.966	-0.126601
296.004	293.161	-0.127193
295.372	293.535	-0.127193
295.906	293.82	-0.127787
290.841	292.966	-0.1229
291.504	293.161	-0.123817
290.872	293.535	-0.123552
291.406	293.82	-0.124413
286.329	292.965	-0.116927
286.999	293.154	-0.118195
286.372	293.535	-0.117666
286.906	293.82	-0.118817
295.341	319.966	-0.128794
296.004	320.161	-0.129035
295.372	320.535	-0.128293
295.911	320.815	-0.128387
290.841	319.966	-0.12519
291.504	320.161	-0.125686
290.872	320.535	-0.12466
291.411	320.815	-0.124952
286.33	319.965	-0.119548
287	320.153	-0.12035
286.372	320.535	-0.119005
286.911	320.815	-0.119519
300.7	316.942	-0.132816
301.296	317.242	-0.132833
300.49	317.526	-0.132465
300.85	317.974	-0.132354
296.228	316.947	-0.131218
296.779	317.323	-0.131318
295.997	317.515	-0.130782
296.373	317.95	-0.130771
291.728	316.947	-0.128167
292.279	317.323	-0.128456
291.497	317.515	-0.127607
291.873	317.95	-0.127715
287.228	316.947	-0.123164
287.779	317.323	-0.123687
286.997	317.515	-0.122458
287.373	317.95	-0.122712
282.728	316.947	-0.116283
283.293	317.349	-0.116971
282.505	317.522	-0.115483
282.919	317.983	-0.115873
299.819	288.482	-0.122651
300.502	288.675	-0.123087
299.844	289.059	-0.123466
300.405	289.323	-0.123965
295.341	288.466	-0.12064
296.003	288.661	-0.121354
295.372	289.035	-0.121486
295.906	289.32	-0.122236
290.819	288.48	-0.11658
291.506	288.667	-0.117651
290.845	289.057	-0.117491
291.406	289.321	-0.118522
286.33	288.465	-0.110196
286.999	288.654	-0.111601
286.372	289.035	-0.111186
286.906	289.32	-0.112508
282.728	289.947	-0.106213
283.287	290.354	-0.10794
282.505	290.522	-0.106706
282.919	290.983	-0.10825
308.395	301.883	-0.133944
309.03	301.691	-0.133753
308.625	302.227	-0.133991
309.232	302.305	-0.1339
312.895	301.883	-0.132398
313.53	301.691	-0.131995
313.125	302.227	-0.132396
313.732	302.305	-0.132116
317.395	301.883	-0.129181
318.03	301.691	-0.128487
317.625	302.227	-0.129103
318.232	302.305	-0.128558
321.895	301.883	-0.123874
322.53	301.691	-0.122879
322.125	302.227	-0.123715
322.73	302.306	-0.122904
300.849	304.184	-0.134567
300.882	304.877	-0.134686
300.352	304.52	-0.134509
300.275	304.99	-0.134577
296.328	304.215	-0.133304
296.349	304.913	-0.133421
295.828	304.522	-0.133107
295.753	305	-0.133154
296.539	302.593	-0.133131
296.36	303.185	-0.133154
291.828	304.215	-0.130616
291.849	304.913	-0.13075
291.328	304.522	-0.130228
291.253	305	-0.130253
292.039	302.593	-0.130493
291.86	303.185	-0.130459
287.328	304.215	-0.125954
287.349	304.913	-0.126117
286.828	304.522	-0.125338
286.753	305	-0.12534
287.539	302.593	-0.125871
287.36	303.185	-0.125777
282.588	304.683	-0.119071
282.471	305.296	-0.119004
282.104	304.75	-0.118285
281.834	305.335	-0.117989
283.414	303.851	-0.120219
300.734	307.396	-0.134794
301.318	307.669	-0.134908
296.256	307.337	-0.133472
296.806	307.588	-0.133704
291.756	307.337	-0.130769
292.306	307.588	-0.131202
287.256	307.337	-0.126122
287.806	307.588	-0.126815
283.415	308.353	-0.120563
308.395	297.383	-0.131743
309.03	297.191	-0.131447
308.625	297.727	-0.13189
309.232	297.805	-0.131785
312.895	297.383	-0.129885
313.53	297.191	-0.129366
313.125	297.727	-0.129986
313.732	297.805	-0.129684
317.395	297.383	-0.126312
318.03	297.191	-0.125494
317.625	297.727	-0.126345
318.232	297.805	-0.125778
321.895	297.383	-0.120656
322.53	297.191	-0.119537
322.125	297.727	-0.120618
322.721	297.811	-0.119812
296.539	298.093	-0.131423
296.353	298.698	-0.131638
292.039	298.093	-0.128608
291.853	298.698	-0.128776
287.539	298.093	-0.123705
287.353	298.698	-0.123826
282.764	298.325	-0.116465
283.31	298.579	-0.117583
300.734	311.896	-0.134429
301.318	312.169	-0.134507
296.256	311.837	-0.133015
296.806	312.087	-0.133213
291.756	311.837	-0.13022
292.306	312.087	-0.13061
287.256	311.837	-0.125495
287.806	312.087	-0.126134
283.415	312.852	-0.119593
308.395	292.883	-0.12778
309.03	292.691	-0.127356
308.625	293.227	-0.128071
309.232	293.305	-0.127955
312.895	292.883	-0.125584
313.53	292.691	-0.124921
313.125	293.227	-0.125821
313.732	293.305	-0.125496
317.395	292.883	-0.121592
318.03	292.691	-0.120623
317.625	293.227	-0.12176
318.232	293.305	-0.121166
321.895	292.883	-0.115508
322.53	292.691	-0.114242
322.125	293.227	-0.115609
322.73	293.306	-0.114762
296.539	293.593	-0.127913
296.353	294.198	-0.128394
292.039	293.593	-0.124813
291.853	294.198	-0.125252
287.539	293.593	-0.119518
287.353	294.198	-0.119917
282.59	295.682	-0.113791
282.483	296.299	-0.114256
282.107	295.747	-0.112996
281.826	296.313	-0.113132
283.413	294.851	-0.114327
308.395	319.883	-0.131448
309.03	319.691	-0.131483
308.625	320.227	-0.131122
309.232	320.305	-0.13096
312.895	319.883	-0.129925
313.53	319.691	-0.129741
313.125	320.227	-0.129501
313.732	320.305	-0.129113
317.395	319.883	-0.126545
318.03	319.691	-0.126076
317.625	320.227	-0.12599
318.232	320.305	-0.125306
321.895	319.883	-0.120959
322.53	319.691	-0.120206
322.125	320.227	-0.120271
322.73	320.306	-0.119302
300.849	322.184	-0.129177
300.882	322.877	-0.128517
300.352	322.52	-0.1287
300.275	322.99	-0.128219
296.328	322.215	-0.127331
296.349	322.913	-0.126634
295.828	322.522	-0.126711
295.753	323	-0.126175
296.539	320.593	-0.12897
296.36	321.185	-0.128332
291.828	322.215	-0.123962
291.849	322.913	-0.123225
291.328	322.522	-0.123118
291.253	323	-0.122516
292.039	320.593	-0.1258
291.86	321.185	-0.12505
287.328	322.215	-0.118612
287.349	322.913	-0.11783
286.828	322.522	-0.117513
286.753	323	-0.116841
287.539	320.593	-0.120675
287.36	321.185	-0.119796
282.752	320.859	-0.112861
283.282	321.111	-0.113499
300.734	325.396	-0.125503
301.318	325.669	-0.125323
296.256	325.337	-0.123601
296.806	325.588	-0.123601
291.756	325.337	-0.119984
292.306	325.588	-0.120193
287.256	325.337	-0.11436
287.806	325.588	-0.114806
283.416	326.353	-0.106506
281.437	324.711	-0.10555
281.054	324.167	-0.105743
281.829	324	-0.107324
281.346	323.612	-0.107054
282.091	324.649	-0.106805
300.746	316.388	-0.133103
301.318	316.669	-0.133115
296.256	316.34	-0.131554
296.807	316.587	-0.13171
291.756	316.34	-0.128551
292.307	316.587	-0.1289
287.256	316.34	-0.123602
287.807	316.587	-0.124192
282.756	316.329	-0.116781
283.308	316.581	-0.117536
288.021	330.661	-0.106848
308.396	288.368	-0.121806
309.027	288.193	-0.121293
308.625	288.727	-0.122249
309.229	288.812	-0.122137
312.9	288.368	-0.119294
313.535	288.192	-0.118525
313.125	288.727	-0.119678
313.731	288.81	-0.119337
317.399	288.368	-0.114897
318.028	288.193	-0.11383
317.625	288.727	-0.11521
318.228	288.811	-0.1146
321.9	288.368	-0.108399
322.528	288.193	-0.107044
322.125	288.727	-0.108647
322.726	288.811	-0.107791
301.039	289.093	-0.123774
300.849	289.702	-0.12457
296.539	289.093	-0.122293
296.353	289.698	-0.123036
292.039	289.093	-0.118868
291.853	289.698	-0.119565
287.539	289.093	-0.113161
287.353	289.698	-0.113816
282.754	289.35	-0.105309
283.29	289.607	-0.106742
324.137	285.933	-0.100105
323.474	285.597	-0.100714
324.361	285.354	-0.0986481
324.026	284.9	-0.0984813
301.085	284.45	-0.116933
300.356	284.679	-0.117106
299.622	284.373	-0.116486
289.958	284.373	-0.108861
289.202	284.667	-0.108288
288.46	284.449	-0.10686
280.054	328.843	-0.0963091
280.283	329.578	-0.0953673
280.016	330.291	-0.0936393
280.046	301.856	-0.114247
280.28	302.593	-0.114889
279.984	303.323	-0.114685
324.454	296.801	-0.116103
324.14	297.22	-0.11704
323.859	296.698	-0.116969
323.645	297.178	-0.1178
305.756	305.992	-0.135159
305.638	305.525	-0.135099
306.183	305.741	-0.135108
306.134	305.151	-0.13502
310.307	305.869	-0.134504
310.178	305.408	-0.134452
310.705	305.667	-0.13435
310.673	305.091	-0.134245
314.807	305.869	-0.132519
314.678	305.408	-0.132497
315.205	305.667	-0.132211
315.173	305.091	-0.132095
319.307	305.869	-0.128625
319.178	305.408	-0.12865
319.705	305.667	-0.12812
319.673	305.091	-0.128001
305.756	310.493	-0.135178
305.637	310.025	-0.135205
306.183	310.241	-0.135187
306.134	309.652	-0.135214
310.307	310.369	-0.134649
310.178	309.908	-0.134697
310.705	310.167	-0.134549
310.673	309.591	-0.134573
314.807	310.369	-0.13274
314.678	309.908	-0.132836
315.205	310.167	-0.132491
315.173	309.591	-0.132527
319.307	310.369	-0.128888
319.178	309.908	-0.129052
319.705	310.167	-0.128447
319.673	309.591	-0.128504
323.79	310.39	-0.122939
323.68	309.969	-0.123129
324.191	310.201	-0.122335
324.127	309.66	-0.122459
305.756	314.993	-0.134253
305.637	314.525	-0.13439
306.183	314.741	-0.134324
306.134	314.152	-0.134487
310.307	314.869	-0.133732
310.178	314.408	-0.1339
310.705	314.667	-0.133679
310.673	314.091	-0.133853
314.807	314.869	-0.131732
314.678	314.408	-0.131967
315.205	314.667	-0.131533
315.173	314.091	-0.131739
319.307	314.869	-0.127744
319.178	314.408	-0.128065
319.705	314.667	-0.127358
319.673	314.091	-0.127607
323.79	314.89	-0.121641
323.681	314.469	-0.121988
324.193	314.702	-0.121093
324.128	314.161	-0.121415
305.756	323.992	-0.12794
305.638	323.525	-0.128454
306.183	323.741	-0.128205
306.134	323.151	-0.128835
310.307	323.869	-0.127287
310.178	323.408	-0.127841
310.705	323.667	-0.127366
310.673	323.091	-0.128003
314.807	323.869	-0.124787
314.678	323.408	-0.125426
315.205	323.667	-0.124706
315.173	323.091	-0.125397
319.307	323.869	-0.120156
319.178	323.408	-0.1209
319.705	323.667	-0.119891
319.673	323.091	-0.120645
305.749	328.487	-0.121906
305.639	328.019	-0.122597
306.177	328.243	-0.122249
306.135	327.647	-0.123122
310.311	328.362	-0.121169
310.179	327.906	-0.121901
310.703	328.162	-0.121302
310.659	327.607	-0.122147
319.311	328.362	-0.113384
319.179	327.906	-0.114308
319.704	328.161	-0.113164
319.659	327.607	-0.114132
283.774	302.011	-0.120256
283.64	301.358	-0.119778
284.409	301.495	-0.121046
283.996	300.884	-0.120124
283.133	301.784	-0.119135
283.253	302.426	-0.119563
283.817	302.705	-0.120556
296.66	306.254	-0.133666
297.411	306.326	-0.133946
296.782	306.894	-0.133716
297.389	307.143	-0.133935
292.16	306.254	-0.131117
292.911	306.326	-0.131664
292.282	306.894	-0.13121
292.889	307.143	-0.131641
287.66	306.254	-0.126654
288.411	306.326	-0.127554
287.782	306.894	-0.12681
288.389	307.143	-0.127526
283.17	306.217	-0.12023
283.861	306.351	-0.12132
283.299	306.878	-0.120445
283.864	307.156	-0.12133
283.161	297.239	-0.116307
283.86	297.354	-0.117582
283.278	297.882	-0.117023
283.865	298.15	-0.118208
296.671	310.76	-0.133428
297.412	310.826	-0.133706
296.783	311.394	-0.133356
297.389	311.643	-0.13354
292.171	310.76	-0.130819
292.912	310.826	-0.131352
292.283	311.394	-0.130768
292.889	311.643	-0.131156
287.671	310.76	-0.12632
288.412	310.826	-0.127197
287.783	311.394	-0.126304
288.389	311.643	-0.126966
283.141	310.738	-0.119816
283.859	310.851	-0.12092
283.29	311.377	-0.11988
283.863	311.656	-0.120705
283.774	293.011	-0.112749
283.64	292.358	-0.11163
284.409	292.495	-0.11316
283.995	291.884	-0.111585
283.133	292.783	-0.111305
283.254	293.426	-0.112358
283.817	293.704	-0.1137
283.771	320.017	-0.115506
283.638	319.362	-0.115927
284.409	319.495	-0.117053
283.995	318.885	-0.116944
283.128	319.796	-0.11465
283.237	320.449	-0.114155
283.823	320.703	-0.11487
296.66	324.254	-0.12527
297.411	324.326	-0.125581
296.782	324.894	-0.124518
297.389	325.143	-0.124515
292.16	324.254	-0.121892
292.911	324.326	-0.122493
292.282	324.894	-0.121146
292.889	325.143	-0.121366
287.66	324.254	-0.116538
288.411	324.326	-0.117483
287.782	324.894	-0.1158
288.389	325.143	-0.116284
283.168	324.244	-0.109329
283.913	324.323	-0.110508
283.287	324.875	-0.108595
283.89	325.114	-0.109287
296.671	315.26	-0.132258
297.412	315.326	-0.132546
296.782	315.899	-0.132031
297.388	316.149	-0.132174
292.171	315.26	-0.129469
292.912	315.326	-0.130018
292.282	315.899	-0.12925
292.888	316.149	-0.129596
287.671	315.26	-0.124779
288.412	315.326	-0.125668
287.782	315.899	-0.124574
288.388	316.149	-0.125187
283.139	315.249	-0.118102
283.859	315.355	-0.119202
283.266	315.887	-0.117925
283.866	316.153	-0.118731
283.772	288.509	-0.105806
283.638	287.837	-0.104392
284.382	288.017	-0.106063
284.001	287.345	-0.104191
283.149	288.278	-0.104246
283.249	288.934	-0.105555
283.827	289.196	-0.107066
324.348	306.268	-0.121901
324.84	306.146	-0.121104
324.572	306.748	-0.121615
325.14	306.655	-0.12071
324.391	324.278	-0.111815
324.897	324.133	-0.111143
324.615	324.799	-0.110638
325.163	324.649	-0.109902
314.644	328.774	-0.117852
314.785	329.188	-0.117051
314.193	329.007	-0.117823
314.306	329.535	-0.116873
323.625	328.779	-0.10588
323.765	329.2	-0.10488
323.181	328.989	-0.106259
323.289	329.536	-0.105103
310.834	287.553	-0.119427
310.71	287.097	-0.118768
311.306	287.33	-0.118765
311.241	286.721	-0.117825
315.355	287.568	-0.115881
315.209	287.081	-0.115212
315.81	287.35	-0.115025
315.74	286.755	-0.114093
319.869	287.575	-0.110244
319.715	287.038	-0.109527
320.409	287.33	-0.108969
320.266	286.78	-0.108214
302.416	302.265	-0.134399
302.439	301.586	-0.134229
303.06	302.016	-0.134354
302.998	301.241	-0.134133
301.407	302.14	-0.13429
301.334	302.866	-0.134426
300.727	302.337	-0.134218
300.749	303.101	-0.134363
307.338	305.757	-0.134988
307.968	306.031	-0.134932
307.273	306.545	-0.135067
307.95	306.68	-0.134981
311.837	305.751	-0.133942
312.467	306.03	-0.133719
311.767	306.533	-0.134068
312.45	306.68	-0.133793
316.337	305.751	-0.131364
316.967	306.03	-0.13089
316.267	306.533	-0.131544
316.95	306.68	-0.130991
320.836	305.75	-0.126731
321.467	306.03	-0.125964
320.767	306.533	-0.126963
321.45	306.68	-0.126088
302.416	297.765	-0.132579
302.439	297.086	-0.132182
303.06	297.516	-0.132438
302.998	296.741	-0.131952
301.407	297.643	-0.13245
301.333	298.378	-0.132823
300.727	297.841	-0.132454
300.751	298.615	-0.132843
307.338	310.257	-0.135092
307.968	310.531	-0.134994
307.273	311.045	-0.135008
307.95	311.18	-0.134906
311.837	310.251	-0.134144
312.467	310.53	-0.133865
311.767	311.033	-0.134083
312.45	311.18	-0.133781
316.337	310.251	-0.131637
316.967	310.53	-0.13109
316.267	311.033	-0.131598
316.95	311.18	-0.131007
320.837	310.251	-0.127037
321.467	310.53	-0.126181
320.767	311.033	-0.12702
321.45	311.18	-0.126094
302.416	293.265	-0.129019
302.439	292.586	-0.128312
303.06	293.016	-0.128759
302.998	292.241	-0.127915
301.407	293.143	-0.12884
301.333	293.878	-0.129541
300.727	293.341	-0.128936
300.751	294.115	-0.129665
302.416	320.265	-0.13117
302.439	319.59	-0.131684
303.06	320.016	-0.131428
302.997	319.244	-0.13198
301.407	320.14	-0.1311
301.334	320.866	-0.130487
300.727	320.337	-0.130765
300.749	321.101	-0.130123
307.338	323.757	-0.128061
307.968	324.031	-0.127641
307.273	324.545	-0.127136
307.95	324.68	-0.126848
311.837	323.751	-0.126748
312.467	324.03	-0.126079
311.767	324.533	-0.125822
312.45	324.68	-0.125256
316.337	323.751	-0.123572
316.967	324.03	-0.122587
316.267	324.533	-0.122619
316.95	324.68	-0.121723
320.836	323.75	-0.118182
321.467	324.03	-0.116865
320.767	324.533	-0.117198
321.45	324.68	-0.115957
307.338	314.757	-0.134226
307.968	315.031	-0.134057
307.273	315.545	-0.133945
307.95	315.68	-0.133802
311.837	314.751	-0.133236
312.467	315.03	-0.132867
311.767	315.533	-0.132957
312.45	315.68	-0.132595
316.337	314.751	-0.130624
316.967	315.03	-0.12997
316.267	315.533	-0.130341
316.95	315.68	-0.129676
320.837	314.751	-0.125884
321.467	315.03	-0.124909
320.767	315.533	-0.125595
321.45	315.68	-0.12459
307.334	328.269	-0.122064
307.965	328.542	-0.121526
307.255	329.079	-0.120824
307.949	329.2	-0.120494
311.835	328.242	-0.12059
312.461	328.529	-0.119764
311.758	328.996	-0.119437
312.45	329.18	-0.118713
316.33	328.278	-0.117035
316.964	328.544	-0.115913
316.248	329.085	-0.115782
316.947	329.198	-0.114823
320.836	328.242	-0.111338
321.462	328.529	-0.109864
320.762	328.999	-0.11014
321.45	329.18	-0.108731
293.03	330.202	-0.113733
292.624	329.898	-0.11383
293.214	329.747	-0.114633
292.788	329.319	-0.114935
284.022	330.218	-0.101007
283.62	329.897	-0.100845
284.18	329.788	-0.10203
283.78	329.322	-0.102144
302.391	288.776	-0.123434
302.462	288.088	-0.122438
303.06	288.517	-0.12305
302.991	287.745	-0.121909
308.812	304.493	-0.134506
309.228	304.82	-0.13451
308.491	304.882	-0.134638
308.703	305.541	-0.134748
307.949	305.352	-0.134829
307.846	304.769	-0.134709
307.318	305.115	-0.134881
313.312	304.493	-0.132973
313.728	304.82	-0.13286
312.991	304.882	-0.133223
313.203	305.541	-0.133295
312.449	305.351	-0.133595
312.346	304.769	-0.133479
311.819	305.114	-0.133815
317.812	304.493	-0.129722
318.228	304.82	-0.129438
317.491	304.882	-0.130129
317.703	305.541	-0.130133
316.949	305.351	-0.13075
316.846	304.769	-0.130653
316.319	305.114	-0.13122
322.312	304.493	-0.124362
322.694	304.793	-0.123938
321.991	304.882	-0.124929
322.192	305.535	-0.124864
321.447	305.35	-0.125817
321.346	304.769	-0.125747
320.819	305.114	-0.126575
299.825	304.761	-0.134416
299.832	305.336	-0.13452
295.301	304.746	-0.132867
295.332	305.336	-0.132984
290.801	304.746	-0.129782
290.832	305.336	-0.129919
286.301	304.746	-0.124654
286.332	305.336	-0.124817
282.951	304.298	-0.119572
282.376	304.213	-0.11858
308.812	308.993	-0.134914
309.228	309.32	-0.134861
308.491	309.382	-0.134955
308.703	310.041	-0.13493
307.949	309.852	-0.135033
307.846	309.269	-0.135031
307.318	309.615	-0.135116
313.312	308.993	-0.133514
313.728	309.32	-0.133331
312.991	309.382	-0.133661
313.203	310.041	-0.133574
312.449	309.851	-0.133905
312.346	309.269	-0.133928
311.819	309.614	-0.134167
317.812	308.993	-0.130374
318.228	309.32	-0.130003
317.491	309.382	-0.130665
317.703	310.041	-0.130481
316.949	309.851	-0.131143
316.846	309.269	-0.131207
316.319	309.614	-0.131667
322.312	308.993	-0.125083
322.728	309.32	-0.124517
321.991	309.382	-0.125522
322.203	310.041	-0.125227
321.449	309.851	-0.126251
321.346	309.269	-0.126371
320.819	309.614	-0.127083
326.306	309.714	-0.119063
325.792	310.094	-0.119836
325.776	309.36	-0.119854
325.277	309.701	-0.12065
299.82	309.207	-0.134511
299.872	309.748	-0.134521
295.32	309.207	-0.132912
295.363	309.756	-0.13292
290.82	309.207	-0.129827
290.863	309.756	-0.129842
286.32	309.207	-0.124733
286.363	309.756	-0.124758
282.11	309.588	-0.118361
281.759	310.115	-0.117728
281.701	309.377	-0.117712
281.215	309.7	-0.116932
282.93	308.818	-0.119746
282.498	309.27	-0.119014
282.356	308.716	-0.118792
282.11	309.133	-0.11839
326.347	300.835	-0.116418
325.85	301.126	-0.117403
325.8	300.374	-0.116913
325.282	300.697	-0.118004
303.839	300.386	-0.133798
303.507	300.852	-0.133994
303.33	300.249	-0.133729
302.848	300.575	-0.133882
282.198	300.65	-0.117036
281.869	301.152	-0.116769
281.734	300.388	-0.116086
281.224	300.767	-0.115506
308.812	313.493	-0.134347
309.228	313.82	-0.134217
308.491	313.882	-0.134299
308.703	314.541	-0.134113
307.949	314.352	-0.134265
307.846	313.769	-0.134401
307.318	314.115	-0.134403
313.312	313.493	-0.132924
313.728	313.82	-0.132647
312.991	313.882	-0.132972
313.203	314.541	-0.132699
312.449	314.351	-0.133097
312.346	313.769	-0.133277
311.819	314.114	-0.13343
317.812	313.493	-0.129712
318.228	313.82	-0.129232
317.491	313.882	-0.129892
317.703	314.541	-0.129495
316.949	314.351	-0.130238
316.846	313.769	-0.130483
316.319	314.114	-0.13085
322.312	313.493	-0.124322
322.728	313.82	-0.123633
321.991	313.882	-0.124637
322.203	314.541	-0.124106
321.449	314.351	-0.125219
321.346	313.769	-0.125541
320.819	314.114	-0.126148
326.352	314.239	-0.117872
325.809	314.618	-0.118556
325.786	313.871	-0.118865
325.271	314.209	-0.119573
299.82	313.707	-0.133778
299.872	314.248	-0.133676
295.32	313.707	-0.132054
295.363	314.256	-0.13194
290.82	313.707	-0.128824
290.863	314.256	-0.128703
286.32	313.707	-0.123591
286.363	314.256	-0.123461
282.109	314.09	-0.116992
281.754	314.626	-0.116173
281.701	313.878	-0.116404
281.193	314.243	-0.115459
282.93	313.318	-0.118631
282.498	313.771	-0.117754
282.356	313.216	-0.117697
282.11	313.633	-0.117165
303.839	295.886	-0.131279
303.507	296.352	-0.131659
303.33	295.749	-0.131172
302.848	296.075	-0.131462
282.949	295.3	-0.114005
282.376	295.212	-0.112856
308.812	322.493	-0.129098
309.228	322.82	-0.128695
308.491	322.882	-0.128778
308.703	323.541	-0.128057
307.949	323.352	-0.128401
307.846	322.769	-0.128999
307.318	323.115	-0.12875
313.312	322.493	-0.127293
313.728	322.82	-0.126711
312.991	322.882	-0.127074
313.203	323.541	-0.126237
312.449	323.351	-0.126876
312.346	322.769	-0.127537
311.819	323.114	-0.127463
317.812	322.493	-0.12352
318.228	322.82	-0.122711
317.491	322.882	-0.123425
317.703	323.541	-0.122432
316.949	323.351	-0.123445
316.846	322.769	-0.124198
316.319	323.114	-0.124342
322.312	322.493	-0.117532
322.694	322.793	-0.116588
321.991	322.882	-0.117552
322.192	323.535	-0.116426
321.447	323.35	-0.117793
321.346	322.769	-0.118641
320.819	323.114	-0.119012
299.825	322.761	-0.128285
299.832	323.336	-0.127706
295.301	322.746	-0.126135
295.332	323.336	-0.125529
290.801	322.746	-0.122308
290.832	323.336	-0.12167
286.301	322.746	-0.116449
286.332	323.336	-0.115778
281.824	322.719	-0.109039
281.859	323.289	-0.108373
308.812	326.993	-0.123607
309.228	327.319	-0.123045
308.491	327.382	-0.123132
308.703	328.041	-0.122125
307.948	327.855	-0.122566
307.846	327.269	-0.123422
307.318	327.616	-0.123029
313.312	326.993	-0.121551
313.72	327.333	-0.120782
312.991	327.382	-0.121189
313.193	328.058	-0.120037
312.449	327.854	-0.120821
312.346	327.269	-0.121745
311.819	327.613	-0.121553
317.812	326.993	-0.117426
318.228	327.319	-0.11644
317.491	327.382	-0.117192
317.703	328.041	-0.115905
316.949	327.857	-0.117048
316.846	327.269	-0.118067
316.318	327.621	-0.118089
322.312	326.993	-0.111072
322.723	327.332	-0.109859
321.991	327.382	-0.110955
322.194	328.058	-0.109504
321.45	327.854	-0.111033
321.346	327.269	-0.112144
320.819	327.613	-0.11241
326.335	327.836	-0.102687
325.794	328.145	-0.103099
325.785	327.389	-0.104396
325.257	327.723	-0.104781
299.82	327.207	-0.122708
299.872	327.748	-0.121955
295.32	327.207	-0.120326
295.363	327.756	-0.119548
290.82	327.207	-0.116186
290.863	327.756	-0.115391
286.32	327.207	-0.110007
286.363	327.756	-0.109192
282.103	327.567	-0.102153
281.761	328.129	-0.100572
281.692	327.371	-0.101732
281.214	327.765	-0.100231
282.929	326.818	-0.104877
282.493	327.264	-0.10336
282.355	326.715	-0.103976
282.11	327.133	-0.102877
326.307	318.735	-0.11501
325.794	319.09	-0.115528
325.783	318.353	-0.116137
325.259	318.689	-0.116737
303.839	318.386	-0.132561
303.507	318.852	-0.132271
303.33	318.249	-0.132583
302.848	318.575	-0.132372
282.199	318.648	-0.114135
281.872	319.145	-0.113151
281.734	318.388	-0.113551
281.244	318.742	-0.112469
311.119	330.743	-0.117054
310.821	330.241	-0.117991
311.588	330.192	-0.117614
311.292	329.657	-0.118649
320.211	330.697	-0.108068
319.86	330.184	-0.109478
320.605	330.191	-0.108289
320.317	329.677	-0.109648
302.243	330.725	-0.118118
301.861	330.073	-0.119028
302.558	330.212	-0.118922
302.366	329.691	-0.11971
300.768	329.802	-0.119126
301.132	330.22	-0.118611
300.482	330.211	-0.118364
300.827	330.734	-0.117723
297.717	330.757	-0.116354
297.336	330.089	-0.117179
298.057	330.212	-0.117337
297.797	329.706	-0.118022
296.252	329.818	-0.116921
296.606	330.201	-0.116563
295.998	330.212	-0.116091
296.308	330.738	-0.115521
293.212	330.658	-0.113171
293.588	330.187	-0.114231
287.242	329.797	-0.107093
287.608	330.167	-0.10704
286.975	330.199	-0.105946
287.327	330.683	-0.105716
284.212	330.664	-0.100572
284.583	330.193	-0.102009
326.307	291.736	-0.10631
325.794	292.09	-0.107774
325.783	291.353	-0.106575
325.259	291.689	-0.108074
303.839	291.386	-0.126828
303.507	291.852	-0.127431
303.33	291.249	-0.126668
302.848	291.575	-0.127118
282.199	291.648	-0.107958
281.873	292.144	-0.108117
281.734	291.389	-0.10667
281.245	291.742	-0.106363
303.848	286.898	-0.120529
303.507	287.354	-0.121273
303.33	286.753	-0.120327
302.85	287.084	-0.120894
324.657	284.239	-0.0961436
324.931	284.854	-0.0966792
323.649	284.33	-0.0981936
301.975	284.406	-0.116961
301.707	285.091	-0.117916
300.951	285.163	-0.117921
297.706	285.148	-0.116903
296.92	285.083	-0.116416
297.707	284.415	-0.115852
296.625	284.395	-0.115251
288.622	285.14	-0.108204
287.85	285.09	-0.106935
287.565	284.415	-0.105387
280.016	327.96	-0.0978191
280.69	328.247	-0.0984769
280.741	329.016	-0.0971853
280.018	300.96	-0.113755
280.667	301.257	-0.114913
280.737	302.022	-0.115373
309.859	332.084	-0.115687
309.548	331.486	-0.116654
310.443	331.33	-0.116532
309.883	331.031	-0.117204
310.884	331.982	-0.11537
327.688	329.058	-0.0981875
327.086	329.373	-0.0986242
326.938	328.488	-0.100496
326.638	329.046	-0.0999997
327.592	328.051	-0.100167
327.695	302.086	-0.115225
327.097	302.397	-0.116262
326.941	301.502	-0.115984
326.642	302.062	-0.116762
327.593	301.061	-0.114729
326.862	309.403	-0.118245
280.691	309.402	-0.116168
326.907	300.496	-0.115321
280.692	300.406	-0.11445
326.878	313.877	-0.117229
280.677	313.877	-0.114825
326.907	327.491	-0.102303
280.682	327.414	-0.0999056
326.83	318.388	-0.114485
280.726	318.388	-0.111939
311.449	331.297	-0.116041
320.557	331.219	-0.106664
302.547	331.254	-0.117397
300.488	331.268	-0.116816
298.141	331.303	-0.115756
296.012	331.275	-0.114496
293.496	331.208	-0.112577
287.033	331.22	-0.104355
284.495	331.212	-0.10014
326.829	291.388	-0.104855
280.726	291.388	-0.104893
280.024	284.413	-0.0914443
327.549	284.396	-0.0910876
296.509	305.615	-0.133571
297.007	305.21	-0.13373
297.029	305.806	-0.133794
297.548	305.618	-0.133957
292.009	305.615	-0.130965
292.507	305.21	-0.131304
292.529	305.806	-0.131377
293.048	305.618	-0.131722
287.509	305.615	-0.126423
288.007	305.21	-0.126989
288.029	305.806	-0.127082
288.548	305.618	-0.127667
283.054	305.578	-0.119989
283.546	305.235	-0.120723
283.53	305.806	-0.120773
284.039	305.639	-0.121543
305.571	306.44	-0.135194
305.253	305.973	-0.135151
296.529	310.146	-0.133455
297.019	309.771	-0.133692
297.033	310.308	-0.133645
297.545	310.14	-0.133847
292.029	310.146	-0.13081
292.519	309.771	-0.13123
292.533	310.308	-0.131175
293.045	310.14	-0.131555
287.529	310.146	-0.126261
288.019	309.771	-0.126918
288.033	310.308	-0.126857
288.545	310.14	-0.127478
283.019	310.129	-0.11975
283.529	309.76	-0.120617
283.515	310.317	-0.120506
284.032	310.145	-0.121338
305.571	310.94	-0.135121
305.253	310.473	-0.135161
296.529	314.646	-0.132424
297.019	314.271	-0.132761
297.033	314.808	-0.132594
297.545	314.64	-0.132851
292.029	314.646	-0.129614
292.519	314.271	-0.130146
292.533	314.808	-0.129958
293.045	314.64	-0.130401
287.529	314.646	-0.124892
288.019	314.271	-0.125672
288.033	314.808	-0.125461
288.545	314.64	-0.126149
283.019	314.633	-0.118233
283.528	314.261	-0.119231
283.515	314.829	-0.118942
284.032	314.646	-0.11985
283.024	296.592	-0.115489
283.535	296.229	-0.116014
283.519	296.799	-0.116532
284.032	296.627	-0.117232
296.509	323.615	-0.125954
297.007	323.21	-0.126682
297.029	323.806	-0.126019
297.548	323.618	-0.126494
292.009	323.615	-0.122559
292.507	323.21	-0.123512
292.529	323.806	-0.122817
293.048	323.618	-0.123504
287.509	323.615	-0.117185
288.007	323.21	-0.1184
288.029	323.806	-0.117669
288.548	323.618	-0.118611
283.021	323.613	-0.109968
283.532	323.23	-0.111372
283.539	323.81	-0.110602
284.048	323.633	-0.111714
305.571	324.44	-0.12741
305.253	323.973	-0.127948
315.134	327.678	-0.119151
315.193	328.245	-0.118214
314.668	328.023	-0.11902
314.789	328.453	-0.118247
324.116	327.707	-0.106857
324.147	328.277	-0.105833
323.664	328.032	-0.1071
323.769	328.467	-0.106177
296.554	328.171	-0.11973
297.032	327.769	-0.120631
297.071	328.329	-0.119803
297.563	328.1	-0.12042
292.06	328.172	-0.116061
292.537	327.77	-0.117182
292.575	328.323	-0.116347
293.068	328.1	-0.117168
287.557	328.17	-0.110373
288.035	327.769	-0.111743
288.077	328.326	-0.110883
288.569	328.1	-0.111953
283.048	328.144	-0.102887
283.549	327.752	-0.104459
283.572	328.309	-0.103549
284.068	328.095	-0.104794
305.571	315.44	-0.134086
305.253	314.973	-0.134238
305.571	328.919	-0.121244
305.252	328.468	-0.12192
306.239	287.651	-0.12141
306.743	288.049	-0.121879
306.243	288.196	-0.122237
305.797	288.039	-0.122097
296.479	300.894	-0.132655
296.932	301.302	-0.132975
296.316	301.558	-0.132796
296.752	301.982	-0.13309
291.979	300.894	-0.129941
292.432	301.302	-0.130452
291.816	301.558	-0.130041
292.252	301.982	-0.130517
287.479	300.894	-0.125202
287.932	301.302	-0.125956
287.316	301.558	-0.125261
287.751	301.981	-0.125969
296.479	296.394	-0.130328
296.932	296.803	-0.130818
296.316	297.058	-0.130716
296.752	297.483	-0.131176
291.979	296.394	-0.127389
292.432	296.802	-0.128094
291.816	297.058	-0.127748
292.252	297.482	-0.128416
287.479	296.394	-0.122315
287.932	296.802	-0.123283
287.316	297.058	-0.122649
287.752	297.482	-0.12357
296.516	318.827	-0.130324
296.935	319.3	-0.130207
296.316	319.558	-0.1297
296.752	319.982	-0.129598
292.016	318.827	-0.127265
292.435	319.299	-0.127276
291.816	319.558	-0.126515
292.252	319.982	-0.126552
287.516	318.827	-0.122265
287.929	319.314	-0.122416
287.316	319.558	-0.121368
287.751	319.98	-0.121575
296.479	291.894	-0.126009
296.932	292.303	-0.126717
296.316	292.558	-0.126708
296.752	292.983	-0.127391
291.979	291.894	-0.122759
292.432	292.302	-0.123703
291.816	292.558	-0.123432
292.252	292.982	-0.124344
287.479	291.894	-0.117278
287.932	292.302	-0.118491
287.316	292.558	-0.117929
287.751	292.981	-0.119099
301.038	287.521	-0.121484
301.426	287.968	-0.12221
300.818	288.083	-0.122291
301.24	288.54	-0.123022
296.509	287.365	-0.119682
296.938	287.828	-0.120632
296.315	288.057	-0.120638
296.753	288.484	-0.121523
291.979	287.457	-0.11624
292.44	287.831	-0.117318
291.836	288.052	-0.117048
292.256	288.494	-0.118177
287.508	287.366	-0.110244
287.939	287.818	-0.111682
287.315	288.058	-0.111118
287.752	288.483	-0.112505
301.027	301.652	-0.134115
301.519	301.608	-0.134174
301.948	301.838	-0.134273
301.896	302.553	-0.134429
301.116	305.508	-0.134813
301.365	305.964	-0.134895
300.696	306.102	-0.134777
301.33	306.514	-0.134911
323.799	297.666	-0.118008
324.457	297.75	-0.117008
324.616	297.258	-0.116295
301.027	297.152	-0.132114
301.519	297.109	-0.132152
301.948	297.338	-0.132321
301.895	298.056	-0.132714
283.681	300.493	-0.119419
283.515	300.865	-0.119346
283.2	300.451	-0.1186
283.012	301.111	-0.118638
301.153	309.994	-0.134811
301.38	310.453	-0.134811
300.71	310.587	-0.134652
301.331	311.013	-0.134723
301.027	292.652	-0.128281
301.519	292.609	-0.128298
301.948	292.838	-0.128571
301.895	293.556	-0.129287
301.028	319.654	-0.13138
301.519	319.609	-0.131528
301.948	319.838	-0.131437
301.896	320.553	-0.130863
301.116	323.508	-0.127923
301.365	323.964	-0.127474
300.696	324.102	-0.127122
301.33	324.514	-0.126806
301.153	314.494	-0.133941
301.38	314.953	-0.133842
300.71	315.087	-0.133639
301.331	315.513	-0.133622
283.681	318.493	-0.116764
283.515	318.865	-0.116175
283.2	318.451	-0.115992
283.012	319.113	-0.115106
301.161	327.977	-0.122063
301.384	328.447	-0.121422
300.714	328.583	-0.121
301.336	329.003	-0.120551
323.839	288.674	-0.105623
324.124	288.245	-0.104365
324.514	288.617	-0.104303
324.484	287.986	-0.103245
283.681	291.493	-0.110451
283.515	291.865	-0.110705
283.2	291.452	-0.10951
283.012	292.111	-0.110146
325.527	305.247	-0.119781
325.355	306.003	-0.120265
324.839	305.531	-0.120953
300.455	305.484	-0.134681
295.955	305.484	-0.13331
295.779	301.626	-0.132564
291.455	305.484	-0.130493
291.279	301.626	-0.129595
286.955	305.484	-0.125687
286.775	301.626	-0.124554
283.024	304.918	-0.119832
300.513	309.908	-0.134676
295.973	309.961	-0.133214
291.473	309.961	-0.130367
286.973	309.961	-0.125562
282.99	309.487	-0.11979
282.46	309.935	-0.118879
305.538	300.418	-0.133815
305.681	301.042	-0.134063
305.032	300.894	-0.134024
305.266	301.469	-0.134231
300.487	300.573	-0.133654
301.095	300.533	-0.133748
300.769	301.121	-0.133912
301.33	301.124	-0.133999
300.292	301.124	-0.133822
295.779	297.126	-0.130493
291.279	297.126	-0.127296
286.779	297.126	-0.121937
282.443	301.017	-0.117649
282.465	301.593	-0.117957
281.928	302.02	-0.117247
300.513	314.408	-0.13381
295.973	314.461	-0.132208
291.473	314.461	-0.129198
286.973	314.461	-0.124226
282.989	313.987	-0.118474
282.459	314.437	-0.11741
282.479	310.582	-0.118785
281.898	310.971	-0.117749
305.538	295.918	-0.131247
305.681	296.542	-0.131716
305.032	296.394	-0.131651
305.266	296.969	-0.132051
300.487	296.073	-0.131264
301.095	296.033	-0.13134
300.769	296.621	-0.131725
301.33	296.624	-0.131807
300.292	296.624	-0.131638
295.779	292.626	-0.12649
291.279	292.626	-0.12297
286.774	292.626	-0.117194
283.015	295.924	-0.114803
325.527	323.195	-0.111345
325.387	323.983	-0.110507
324.87	323.505	-0.112065
300.455	323.484	-0.127754
295.955	323.484	-0.125768
295.78	319.628	-0.129343
291.455	323.484	-0.122158
291.28	319.628	-0.125941
286.955	323.484	-0.116538
286.776	319.626	-0.120537
282.437	323.481	-0.109121
300.515	327.903	-0.121962
295.973	327.962	-0.119667
291.473	327.962	-0.11576
286.973	327.962	-0.10982
282.991	327.484	-0.103899
282.458	327.938	-0.102168
305.538	318.418	-0.132671
305.681	319.042	-0.132308
305.032	318.894	-0.132374
305.266	319.469	-0.132018
300.514	318.6	-0.131924
301.113	318.573	-0.132098
300.771	319.127	-0.131677
301.333	319.137	-0.131807
300.296	319.117	-0.131551
282.443	319.016	-0.114233
282.465	319.596	-0.11372
281.913	320.024	-0.112339
282.478	315.089	-0.117104
281.902	315.522	-0.115901
282.483	328.594	-0.101066
281.918	329.033	-0.099242
305.538	291.418	-0.126758
305.681	292.042	-0.127507
305.032	291.894	-0.1274
305.266	292.469	-0.128055
324.907	288.16	-0.102781
325.161	288.628	-0.103141
300.484	291.574	-0.126924
301.094	291.534	-0.126987
300.767	292.121	-0.127643
301.329	292.124	-0.127729
300.292	292.124	-0.127554
300.279	288.153	-0.122287
295.782	288.132	-0.120428
291.277	288.141	-0.116575
286.776	288.127	-0.110367
282.444	292.015	-0.108969
282.466	292.594	-0.109836
281.921	293.006	-0.109414
305.529	286.854	-0.120322
305.668	287.487	-0.121279
305.031	287.367	-0.121182
305.244	287.94	-0.122035
306.165	287.074	-0.120538
306.777	287.387	-0.120854
306.72	286.703	-0.119805
301.632	287.448	-0.12145
301.816	287.001	-0.12078
302.279	287.398	-0.121396
302.231	286.739	-0.120386
298.727	305.207	-0.134234
298.7	305.858	-0.134296
298.137	305.404	-0.134109
298.075	306.096	-0.134143
294.227	305.206	-0.132381
294.199	305.858	-0.132431
293.637	305.404	-0.13207
293.575	306.096	-0.132082
289.727	305.206	-0.128853
289.699	305.858	-0.128898
289.137	305.404	-0.128282
289.075	306.096	-0.128274
285.226	305.207	-0.123242
285.195	305.861	-0.12328
284.636	305.409	-0.122414
284.56	306.105	-0.122369
302.72	305.842	-0.135016
303.166	306.206	-0.13507
302.614	306.638	-0.135048
303.288	306.712	-0.135088
298.729	309.703	-0.134225
298.702	310.356	-0.134167
298.14	309.907	-0.134053
298.076	310.596	-0.133957
294.23	309.697	-0.132316
294.202	310.352	-0.132233
293.641	309.905	-0.13196
293.576	310.596	-0.131826
289.73	309.697	-0.128776
289.702	310.352	-0.128664
289.141	309.905	-0.128157
289.076	310.596	-0.127977
285.228	309.698	-0.123175
285.198	310.355	-0.123031
284.635	309.909	-0.122285
284.559	310.605	-0.122044
308.487	301.305	-0.133725
309.18	300.959	-0.133434
308.648	300.686	-0.133423
312.987	301.305	-0.132115
313.68	300.959	-0.131579
313.148	300.686	-0.131722
317.487	301.305	-0.128819
318.18	300.959	-0.127952
317.648	300.686	-0.128312
321.987	301.305	-0.123432
322.679	300.958	-0.122231
322.147	300.685	-0.122812
302.721	310.342	-0.134986
303.166	310.706	-0.134984
302.614	311.137	-0.134868
303.288	311.212	-0.13491
298.729	314.203	-0.13336
298.702	314.856	-0.133156
298.14	314.407	-0.133127
298.076	315.096	-0.132873
294.23	314.197	-0.131312
294.202	314.852	-0.131071
293.641	314.405	-0.130885
293.576	315.096	-0.130579
289.73	314.197	-0.127611
289.702	314.852	-0.127322
289.141	314.405	-0.126915
289.076	315.096	-0.126542
285.228	314.198	-0.12186
285.198	314.855	-0.121517
284.635	314.409	-0.120888
284.56	315.106	-0.12043
308.487	296.805	-0.131319
309.18	296.459	-0.130861
308.648	296.186	-0.130784
312.987	296.805	-0.129389
313.68	296.459	-0.128671
313.148	296.186	-0.128754
317.487	296.805	-0.125724
318.18	296.459	-0.124664
317.648	296.186	-0.124962
321.987	296.805	-0.119972
322.684	296.475	-0.118584
322.148	296.187	-0.119082
298.727	323.207	-0.127441
298.7	323.858	-0.126704
298.137	323.404	-0.126995
298.075	324.096	-0.126166
294.227	323.206	-0.124906
294.199	323.858	-0.124118
293.637	323.404	-0.124237
293.575	324.096	-0.123342
289.727	323.206	-0.120582
289.699	323.858	-0.11973
289.137	323.404	-0.119632
289.075	324.096	-0.118655
285.228	323.206	-0.114218
285.2	323.858	-0.113303
284.64	323.407	-0.113004
284.576	324.096	-0.111952
302.72	323.842	-0.12786
303.166	324.206	-0.127492
302.614	324.638	-0.126894
303.288	324.712	-0.126878
298.729	327.7	-0.121565
298.701	328.346	-0.120576
298.143	327.89	-0.121022
298.078	328.556	-0.11997
294.231	327.694	-0.118785
294.202	328.342	-0.11775
293.656	327.885	-0.11802
293.583	328.557	-0.116892
289.73	327.697	-0.114127
289.702	328.345	-0.113033
289.155	327.884	-0.113093
289.085	328.558	-0.111883
285.231	327.694	-0.107455
285.202	328.342	-0.106304
284.647	327.89	-0.106143
284.583	328.558	-0.104883
308.487	319.305	-0.131853
309.18	318.959	-0.131956
308.648	318.686	-0.132214
312.987	319.305	-0.130326
313.68	318.959	-0.130197
313.148	318.686	-0.130659
317.487	319.305	-0.126945
318.18	318.959	-0.126513
317.648	318.686	-0.127247
321.987	319.305	-0.121358
322.679	318.958	-0.120632
322.147	318.685	-0.121634
302.721	314.842	-0.134067
303.166	315.206	-0.133986
302.614	315.637	-0.13376
303.288	315.712	-0.133791
302.722	328.331	-0.121867
303.161	328.69	-0.121381
302.621	329.075	-0.120705
303.276	329.201	-0.120588
308.487	292.305	-0.127087
309.18	291.959	-0.126425
308.648	291.686	-0.126258
312.987	292.305	-0.124816
313.68	291.959	-0.123879
313.148	291.686	-0.123885
317.487	292.305	-0.120729
318.18	291.959	-0.119444
317.648	291.686	-0.119669
321.987	292.305	-0.114549
322.678	291.958	-0.112931
322.147	291.685	-0.113362
308.459	287.791	-0.120896
309.182	287.448	-0.120067
308.653	287.183	-0.119851
312.959	287.791	-0.118325
313.687	287.454	-0.117199
313.145	287.178	-0.117164
317.459	287.791	-0.113853
318.183	287.454	-0.112366
317.643	287.178	-0.112557
321.959	287.791	-0.107277
322.673	287.433	-0.105429
322.163	287.187	-0.105833
280.57	305.333	-0.116037
281.229	305.373	-0.117047
280.91	306.06	-0.116638
281.564	305.959	-0.117645
280.598	296.367	-0.111142
281.235	296.374	-0.112196
280.931	297.066	-0.112373
281.548	296.935	-0.113276
280.598	287.366	-0.0978129
281.259	287.369	-0.099028
280.939	288.068	-0.0997246
281.573	287.948	-0.100682
283.05	331.353	-0.0972831
282.997	330.727	-0.0982426
283.677	331.059	-0.0989393
283.516	330.512	-0.0995822
292.07	331.326	-0.110977
292	330.717	-0.111848
292.681	331.048	-0.112057
292.517	330.501	-0.112751
306.017	330.352	-0.119028
306.627	330.702	-0.118446
305.923	331.038	-0.118013
306.612	331.375	-0.117473
315.083	330.455	-0.114726
315.621	330.697	-0.113811
314.906	331.03	-0.113987
315.578	331.347	-0.112849
324.083	330.454	-0.102085
324.619	330.697	-0.100672
323.905	331.03	-0.10141
324.578	331.347	-0.0996385
326.016	305.932	-0.119228
326.288	305.353	-0.118654
326.645	306.06	-0.11831
326.985	305.333	-0.117622
326.013	296.905	-0.113625
326.307	296.324	-0.112502
326.641	297.04	-0.112759
326.957	296.367	-0.111524
325.978	287.942	-0.100415
326.289	287.346	-0.098728
326.614	288.063	-0.0994999
326.957	287.366	-0.0975849
307.799	301.785	-0.134024
308.037	302.405	-0.134135
312.299	301.785	-0.13265
312.537	302.405	-0.132727
316.799	301.785	-0.129679
317.037	302.405	-0.129696
321.299	301.785	-0.124642
321.537	302.405	-0.124587
307.799	297.285	-0.131825
308.037	297.905	-0.132127
312.299	297.285	-0.130148
312.537	297.905	-0.13042
316.799	297.285	-0.126822
317.037	297.905	-0.127047
321.299	297.285	-0.121428
321.537	297.905	-0.121601
307.799	292.785	-0.127854
308.037	293.405	-0.128422
312.299	292.785	-0.125853
312.537	293.405	-0.126385
316.799	292.785	-0.122114
317.037	293.405	-0.122599
321.299	292.785	-0.11629
321.537	293.405	-0.116726
307.799	319.785	-0.131614
308.037	320.405	-0.131061
312.299	319.785	-0.1303
312.537	320.405	-0.129639
316.799	319.785	-0.127202
317.037	320.405	-0.126387
321.299	319.785	-0.121909
321.537	320.405	-0.120932
307.819	288.288	-0.121888
308.037	288.905	-0.122709
312.336	288.288	-0.119574
312.549	288.911	-0.120365
316.836	288.289	-0.115426
317.049	288.911	-0.116172
321.338	288.289	-0.10917
321.549	288.911	-0.109878
304.757	303.136	-0.134614
305.109	303.721	-0.134741
304.735	304.209	-0.134823
307.252	304.546	-0.134761
307.214	304.034	-0.134651
306.932	303.563	-0.134594
307.305	303.154	-0.134442
307.482	302.566	-0.134281
308.845	302.676	-0.134062
309.303	302.789	-0.134007
309.341	303.294	-0.134119
309.621	303.741	-0.134175
309.222	304.203	-0.134359
311.752	304.546	-0.133687
311.714	304.034	-0.133562
311.432	303.563	-0.133559
311.805	303.154	-0.133284
311.982	302.566	-0.133041
313.345	302.676	-0.132426
313.803	302.789	-0.13223
313.841	303.294	-0.132359
314.121	303.741	-0.132344
313.722	304.203	-0.132684
316.252	304.546	-0.131093
316.214	304.034	-0.130958
315.932	303.563	-0.131042
316.305	303.154	-0.130596
316.482	302.566	-0.130249
317.845	302.676	-0.129066
318.303	302.789	-0.128674
318.341	303.294	-0.128816
318.621	303.741	-0.128696
318.222	304.203	-0.129241
320.752	304.546	-0.126457
320.714	304.034	-0.126318
320.432	303.563	-0.126514
320.805	303.154	-0.12587
320.982	302.566	-0.125408
322.345	302.676	-0.123607
322.803	302.789	-0.123017
322.84	303.293	-0.123172
323.116	303.737	-0.122953
322.712	304.195	-0.123699
325.963	304.76	-0.118925
325.294	304.54	-0.119877
325.218	304.034	-0.11979
324.932	303.563	-0.120056
325.274	303.172	-0.11935
325.389	302.641	-0.118947
325.881	302.582	-0.118156
326.246	302.277	-0.117463
326.614	302.558	-0.11705
304.256	304.633	-0.134884
303.641	304.989	-0.134927
303.268	304.638	-0.134852
302.753	304.485	-0.13481
302.721	304	-0.13472
303.34	302.595	-0.134473
303.778	302.218	-0.134405
304.301	302.685	-0.134512
302.472	303.527	-0.13463
302.793	303.186	-0.134578
302.837	302.685	-0.134488
299.287	305.001	-0.134331
298.747	304.647	-0.134144
300.329	304.045	-0.134422
300.281	303.274	-0.134284
300.605	303.658	-0.134421
299.697	302.664	-0.134046
300.211	302.789	-0.134187
298.852	302.628	-0.133843
299.262	302.326	-0.133886
298.3	304.146	-0.133956
297.975	303.563	-0.133783
298.286	303.197	-0.133804
298.339	302.686	-0.133733
294.787	305.001	-0.132644
294.247	304.647	-0.132298
295.826	304.055	-0.133026
295.863	303.292	-0.132919
296.127	303.68	-0.133116
294.353	302.623	-0.132016
294.765	302.303	-0.13218
293.8	304.146	-0.13197
293.475	303.563	-0.131686
293.786	303.197	-0.131805
293.839	302.686	-0.131745
290.287	305.001	-0.129352
289.747	304.647	-0.128771
291.326	304.055	-0.130139
291.363	303.292	-0.13003
291.627	303.68	-0.13034
289.853	302.623	-0.128481
290.265	302.303	-0.12881
289.3	304.146	-0.128238
288.975	303.563	-0.12779
289.286	303.197	-0.12804
289.339	302.686	-0.127983
285.787	305.001	-0.123994
285.247	304.647	-0.12316
286.826	304.055	-0.125232
286.863	303.292	-0.125113
287.127	303.68	-0.125562
285.347	302.618	-0.122828
285.78	302.298	-0.123356
284.8	304.146	-0.122414
284.476	303.576	-0.121807
284.785	303.203	-0.122173
284.839	302.686	-0.122111
281.553	304.786	-0.117417
281.708	302.6	-0.117081
282.227	302.646	-0.117931
280.871	302.587	-0.115781
281.298	302.279	-0.116334
304.757	307.636	-0.135159
305.109	308.221	-0.135182
304.735	308.709	-0.135158
307.252	309.046	-0.13511
307.214	308.534	-0.135102
306.932	308.063	-0.135132
307.294	307.674	-0.135081
307.513	307.172	-0.135048
307.966	307.155	-0.134987
308.42	306.871	-0.134917
308.781	307.177	-0.134871
309.303	307.289	-0.134799
309.341	307.794	-0.134802
309.621	308.241	-0.134771
309.222	308.703	-0.134842
311.752	309.046	-0.134171
311.714	308.534	-0.134165
311.432	308.063	-0.134261
311.794	307.674	-0.134103
312.013	307.172	-0.133998
312.466	307.155	-0.133807
312.92	306.871	-0.133595
313.281	307.177	-0.133448
313.803	307.289	-0.133212
313.841	307.794	-0.133215
314.121	308.241	-0.133097
313.722	308.703	-0.133309
316.252	309.046	-0.131695
316.214	308.534	-0.131699
315.932	308.063	-0.131903
316.294	307.674	-0.131593
316.513	307.172	-0.131389
316.966	307.155	-0.13101
317.42	306.871	-0.130599
317.781	307.177	-0.130301
318.303	307.289	-0.129833
318.341	307.794	-0.129829
318.621	308.241	-0.129586
318.222	308.703	-0.129986
320.752	309.046	-0.127144
320.714	308.534	-0.127166
320.432	308.063	-0.127503
320.794	307.674	-0.127015
321.013	307.172	-0.126701
321.466	307.155	-0.126107
321.92	306.871	-0.125479
322.281	307.177	-0.12502
322.803	307.289	-0.124313
322.841	307.794	-0.124298
323.121	308.241	-0.12393
322.722	308.703	-0.124511
325.217	309.055	-0.120718
325.214	308.534	-0.120698
324.932	308.063	-0.121121
325.294	307.669	-0.120528
325.442	307.148	-0.12027
325.866	307.071	-0.119609
326.217	306.656	-0.119041
326.805	306.893	-0.118197
304.256	309.133	-0.135124
303.641	309.489	-0.135082
303.268	309.138	-0.135062
302.753	308.985	-0.135033
302.724	308.501	-0.135032
303.414	307.17	-0.135088
303.821	306.896	-0.135109
304.305	307.227	-0.135134
302.485	308.032	-0.135023
302.814	307.683	-0.135048
302.948	307.198	-0.135062
299.288	309.483	-0.134371
298.747	309.147	-0.134239
300.309	307.666	-0.134672
299.709	307.138	-0.13454
300.21	307.201	-0.134665
298.866	307.131	-0.134333
299.288	306.844	-0.134446
298.3	308.646	-0.134136
297.978	308.071	-0.134072
298.299	307.699	-0.134172
298.373	307.179	-0.134211
294.789	309.467	-0.132626
294.247	309.147	-0.132347
295.81	307.662	-0.133227
295.205	307.144	-0.132946
295.697	307.196	-0.133197
294.366	307.131	-0.132507
294.788	306.844	-0.132745
293.8	308.646	-0.132123
293.478	308.071	-0.131967
293.799	307.699	-0.132172
293.873	307.179	-0.132239
290.289	309.467	-0.129324
289.747	309.147	-0.128826
291.31	307.662	-0.130351
290.705	307.144	-0.129836
291.197	307.196	-0.130281
289.866	307.131	-0.129055
290.288	306.844	-0.129467
289.3	308.646	-0.128419
288.978	308.071	-0.128126
289.299	307.699	-0.128475
289.373	307.179	-0.128574
285.789	309.468	-0.123984
285.247	309.147	-0.123249
286.81	307.662	-0.125493
286.205	307.144	-0.1247
286.697	307.196	-0.125371
285.366	307.131	-0.12354
285.788	306.844	-0.124139
284.8	308.646	-0.122652
284.48	308.074	-0.122225
284.798	307.7	-0.12271
284.873	307.179	-0.12284
281.747	307.084	-0.117925
282.266	307.14	-0.11875
280.751	306.893	-0.116406
281.354	306.672	-0.117329
304.757	298.636	-0.132988
305.114	299.22	-0.133264
304.752	299.708	-0.133492
308.787	300.124	-0.133111
308.161	300.467	-0.133414
307.782	300.17	-0.133349
307.252	300.046	-0.133403
307.214	299.534	-0.133159
306.932	299.063	-0.132987
307.305	298.654	-0.132699
307.482	298.066	-0.132352
308.845	298.176	-0.13209
309.303	298.289	-0.13204
309.345	298.786	-0.132294
309.619	299.25	-0.132471
309.234	299.702	-0.132798
313.287	300.124	-0.131327
312.661	300.467	-0.131847
312.282	300.17	-0.131874
311.752	300.046	-0.132073
311.714	299.534	-0.131806
311.432	299.063	-0.131684
311.805	298.654	-0.131262
311.982	298.066	-0.130825
313.345	298.176	-0.130148
313.803	298.289	-0.129954
313.845	298.786	-0.130234
314.119	299.25	-0.13035
313.734	299.702	-0.130841
317.787	300.124	-0.127816
317.161	300.467	-0.128631
316.782	300.17	-0.128793
316.252	300.046	-0.129199
316.214	299.534	-0.128908
315.932	299.063	-0.128862
316.305	298.654	-0.128256
316.482	298.066	-0.127698
317.845	298.176	-0.126451
318.303	298.289	-0.126063
318.345	298.786	-0.126368
318.619	299.25	-0.126397
318.234	299.702	-0.127101
322.287	300.124	-0.122216
321.661	300.467	-0.123337
321.282	300.17	-0.123652
320.752	300.046	-0.124293
320.714	299.534	-0.123979
320.432	299.063	-0.124026
320.805	298.654	-0.123211
320.982	298.066	-0.12252
322.345	298.176	-0.120668
322.803	298.289	-0.12009
322.845	298.786	-0.12042
323.12	299.247	-0.120363
322.733	299.701	-0.121273
325.239	300.04	-0.117562
325.214	299.534	-0.117202
324.932	299.063	-0.117293
325.274	298.672	-0.116414
325.388	298.14	-0.115791
325.868	298.073	-0.114957
326.22	297.65	-0.114021
326.808	297.889	-0.113323
304.309	300.147	-0.133689
302.752	300.046	-0.133648
302.723	299.5	-0.133402
303.34	298.095	-0.132736
[truncated: 4,673 more rows]

## Sheet: Figure-13-c-d
300.289	308.936	-0.108313
300.838	308.878	-0.108257
300.407	309.377	-0.108339
301.011	309.448	-0.10829
295.789	308.936	-0.109446
296.324	308.918	-0.109298
295.907	309.376	-0.109442
296.449	309.53	-0.109302
291.289	308.936	-0.110927
291.824	308.918	-0.110791
291.407	309.376	-0.11092
291.949	309.53	-0.110784
286.789	308.936	-0.111545
287.324	308.918	-0.11158
286.907	309.376	-0.111571
287.449	309.53	-0.111601
300.289	313.436	-0.108906
300.838	313.378	-0.108855
300.407	313.877	-0.109015
301.011	313.948	-0.108994
295.789	313.436	-0.109947
296.324	313.418	-0.109809
295.907	313.876	-0.110029
296.449	314.03	-0.109929
291.289	313.436	-0.111318
291.824	313.418	-0.111196
291.407	313.876	-0.111389
291.949	314.03	-0.111296
286.789	313.436	-0.111838
287.324	313.418	-0.111881
286.907	313.876	-0.11193
287.449	314.03	-0.111993
282.289	322.438	-0.111242
282.824	322.418	-0.111505
282.408	322.876	-0.111256
282.947	323.035	-0.111495
300.289	326.936	-0.110348
300.838	326.878	-0.110337
300.407	327.377	-0.110229
301.013	327.444	-0.110182
295.789	326.936	-0.111205
296.324	326.918	-0.111101
295.907	327.376	-0.111061
296.455	327.533	-0.1109
291.289	326.936	-0.112023
291.824	326.918	-0.111992
291.407	327.376	-0.111882
291.961	327.538	-0.111784
286.789	326.936	-0.111727
287.324	326.918	-0.111871
286.907	327.376	-0.111595
287.456	327.533	-0.111667
282.774	302.723	-0.111306
283.21	303.128	-0.111398
282.503	303.191	-0.111056
282.758	303.709	-0.111079
300.728	307.947	-0.108244
301.296	308.242	-0.108193
300.503	308.473	-0.10826
296.228	307.947	-0.109319
296.768	308.337	-0.109156
296.003	308.473	-0.109366
291.728	307.947	-0.110824
292.268	308.337	-0.110654
291.503	308.473	-0.110862
287.228	307.947	-0.111592
287.768	308.337	-0.111581
287.003	308.473	-0.111556
282.803	307.214	-0.110648
283.231	307.609	-0.110785
282.503	307.691	-0.110438
282.761	308.212	-0.110529
300.728	312.447	-0.108661
301.296	312.742	-0.108685
300.503	312.973	-0.108771
296.228	312.447	-0.109638
296.768	312.837	-0.109564
296.003	312.973	-0.109783
291.728	312.447	-0.111055
292.268	312.837	-0.110968
291.503	312.973	-0.11118
287.228	312.447	-0.111742
287.768	312.837	-0.111801
287.003	312.973	-0.111783
282.789	311.707	-0.110644
283.229	312.108	-0.110853
282.503	312.191	-0.11052
282.761	312.712	-0.110693
282.774	293.722	-0.112254
283.21	294.128	-0.112496
282.503	294.191	-0.112132
282.758	294.709	-0.1123
282.728	321.447	-0.111528
283.262	321.842	-0.111753
282.503	321.973	-0.111374
300.728	325.947	-0.110548
301.296	326.242	-0.110469
300.503	326.473	-0.110436
296.228	325.947	-0.11135
296.768	326.337	-0.111147
296.003	326.473	-0.11127
291.728	325.947	-0.112264
292.268	326.337	-0.112102
291.503	326.473	-0.112136
287.228	325.947	-0.112176
287.768	326.337	-0.112159
287.003	326.473	-0.111942
282.808	325.223	-0.110851
283.232	325.61	-0.110919
282.503	325.691	-0.110484
282.761	326.212	-0.110418
288.744	330.689	-0.110327
288.343	330.051	-0.110608
289.031	330.172	-0.110603
288.795	329.688	-0.110852
295.341	301.966	-0.110637
296.004	302.161	-0.110377
295.372	302.535	-0.110429
295.911	302.815	-0.1102
290.841	301.966	-0.11205
291.504	302.161	-0.111844
290.872	302.535	-0.111861
291.411	302.815	-0.111676
286.329	301.965	-0.11244
287	302.153	-0.112465
286.372	302.535	-0.112286
286.911	302.815	-0.112288
295.341	297.466	-0.111895
296.004	297.661	-0.111644
295.372	298.035	-0.111695
295.906	298.32	-0.111465
290.841	297.466	-0.113173
291.504	297.661	-0.113
290.872	298.035	-0.112991
291.406	298.32	-0.112826
286.341	297.466	-0.11333
287.004	297.661	-0.113394
286.372	298.035	-0.113203
286.906	298.32	-0.113233
282.728	298.947	-0.111978
283.293	299.349	-0.112169
282.505	299.522	-0.111776
282.919	299.983	-0.111911
295.341	292.966	-0.11257
296.004	293.161	-0.112373
295.372	293.535	-0.112497
295.906	293.82	-0.112332
290.841	292.966	-0.11367
291.504	293.161	-0.113582
290.872	293.535	-0.113636
291.406	293.82	-0.113559
286.329	292.965	-0.113477
286.999	293.154	-0.113644
286.372	293.535	-0.1135
286.906	293.82	-0.113635
295.341	319.966	-0.111592
296.004	320.161	-0.111461
295.372	320.535	-0.111639
295.911	320.815	-0.111553
290.841	319.966	-0.112679
291.504	320.161	-0.112599
290.872	320.535	-0.112711
291.411	320.815	-0.112663
286.33	319.965	-0.112707
287	320.153	-0.112829
286.372	320.535	-0.112709
286.911	320.815	-0.112816
300.7	316.942	-0.109738
301.296	317.242	-0.109791
300.49	317.526	-0.109893
300.85	317.974	-0.110016
296.228	316.947	-0.110662
296.779	317.323	-0.110619
295.997	317.515	-0.110849
296.373	317.95	-0.110888
291.728	316.947	-0.111919
292.279	317.323	-0.111882
291.497	317.515	-0.112073
291.873	317.95	-0.112117
287.228	316.947	-0.112417
287.779	317.323	-0.112514
286.997	317.515	-0.112474
287.373	317.95	-0.112602
282.728	316.947	-0.111277
283.293	317.349	-0.111583
282.505	317.522	-0.111242
282.919	317.983	-0.111514
299.819	288.482	-0.11059
300.502	288.675	-0.11051
299.844	289.059	-0.110724
300.405	289.323	-0.110686
295.341	288.466	-0.111846
296.003	288.661	-0.11173
295.372	289.035	-0.11199
295.906	289.32	-0.11193
290.819	288.48	-0.112715
291.506	288.667	-0.112737
290.845	289.057	-0.112892
291.406	289.321	-0.112941
286.33	288.465	-0.112139
286.999	288.654	-0.112434
286.372	289.035	-0.112382
286.906	289.32	-0.112662
282.728	289.947	-0.111131
283.287	290.354	-0.111632
282.505	290.522	-0.111236
282.919	290.983	-0.111678
308.395	301.883	-0.109699
309.03	301.691	-0.109936
308.625	302.227	-0.109671
309.232	302.305	-0.109865
312.895	301.883	-0.11129
313.53	301.691	-0.11158
313.125	302.227	-0.111296
313.732	302.305	-0.111545
317.395	301.883	-0.112861
318.03	301.691	-0.113045
317.625	302.227	-0.112856
318.232	302.305	-0.11301
321.895	301.883	-0.113254
322.53	301.691	-0.113183
322.125	302.227	-0.113179
322.73	302.306	-0.113091
300.849	304.184	-0.10866
300.882	304.877	-0.108553
300.352	304.52	-0.108663
300.275	304.99	-0.108621
296.328	304.215	-0.109767
296.349	304.913	-0.109648
295.828	304.522	-0.109856
295.753	305	-0.109818
296.539	302.593	-0.110093
296.36	303.185	-0.109983
291.828	304.215	-0.111274
291.849	304.913	-0.111159
291.328	304.522	-0.11135
291.253	305	-0.11131
292.039	302.593	-0.111585
291.86	303.185	-0.111479
287.328	304.215	-0.112049
287.349	304.913	-0.111952
286.828	304.522	-0.111972
286.753	305	-0.111913
287.539	302.593	-0.112382
287.36	303.185	-0.112242
282.588	304.683	-0.110878
282.471	305.296	-0.11075
282.104	304.75	-0.110639
281.834	305.335	-0.110461
283.414	303.851	-0.111343
300.734	307.396	-0.108283
301.318	307.669	-0.108208
296.256	307.337	-0.109362
296.806	307.588	-0.10918
291.756	307.337	-0.11087
292.306	307.588	-0.110683
287.256	307.337	-0.111649
287.806	307.588	-0.111624
283.415	308.353	-0.110815
308.395	297.383	-0.110689
309.03	297.191	-0.110905
308.625	297.727	-0.110646
309.232	297.805	-0.110818
312.895	297.383	-0.112105
313.53	297.191	-0.112364
313.125	297.727	-0.112101
313.732	297.805	-0.112319
317.395	297.383	-0.113425
318.03	297.191	-0.113569
317.625	297.727	-0.113405
318.232	297.805	-0.113521
321.895	297.383	-0.113561
322.53	297.191	-0.113458
322.125	297.727	-0.113491
322.721	297.811	-0.113388
296.539	298.093	-0.111359
296.353	298.698	-0.111234
292.039	298.093	-0.112765
291.853	298.698	-0.11264
287.539	298.093	-0.113353
287.353	298.698	-0.113208
282.764	298.325	-0.112115
283.31	298.579	-0.112309
300.734	311.896	-0.108586
301.318	312.169	-0.108586
296.256	311.837	-0.109557
296.806	312.087	-0.109437
291.756	311.837	-0.110988
292.306	312.087	-0.110858
287.256	311.837	-0.1117
287.806	312.087	-0.111723
283.415	312.852	-0.111001
308.395	292.883	-0.111191
309.03	292.691	-0.111342
308.625	293.227	-0.111223
309.232	293.305	-0.111387
312.895	292.883	-0.11244
313.53	292.691	-0.112627
313.125	293.227	-0.112497
313.732	293.305	-0.112698
317.395	292.883	-0.113486
318.03	292.691	-0.113531
317.625	293.227	-0.11353
318.232	293.305	-0.11361
321.895	292.883	-0.113241
322.53	292.691	-0.113041
322.125	293.227	-0.113234
322.73	293.306	-0.113101
296.539	293.593	-0.112189
296.353	294.198	-0.112176
292.039	293.593	-0.113473
291.853	294.198	-0.113467
287.539	293.593	-0.113754
287.353	294.198	-0.113727
282.59	295.682	-0.112279
282.483	296.299	-0.112227
282.107	295.747	-0.112037
281.826	296.313	-0.111919
283.413	294.851	-0.112627
308.395	319.883	-0.111474
309.03	319.691	-0.111658
308.625	320.227	-0.111601
309.232	320.305	-0.111842
312.895	319.883	-0.113193
313.53	319.691	-0.113415
313.125	320.227	-0.113325
313.732	320.305	-0.11359
317.395	319.883	-0.114678
318.03	319.691	-0.11478
317.625	320.227	-0.114755
318.232	320.305	-0.114885
321.895	319.883	-0.114828
322.53	319.691	-0.114702
322.125	320.227	-0.114795
322.73	320.306	-0.114687
300.849	322.184	-0.11079
300.882	322.877	-0.110842
300.352	322.52	-0.110839
300.275	322.99	-0.110888
296.328	322.215	-0.111596
296.349	322.913	-0.111639
295.828	322.522	-0.11172
295.753	323	-0.111775
296.539	320.593	-0.111394
296.36	321.185	-0.1115
291.828	322.215	-0.112679
291.849	322.913	-0.112693
291.328	322.522	-0.112753
291.253	323	-0.112775
292.039	320.593	-0.112545
291.86	321.185	-0.112623
287.328	322.215	-0.112873
287.349	322.913	-0.112849
286.828	322.522	-0.112766
286.753	323	-0.112734
287.539	320.593	-0.112911
287.36	321.185	-0.112894
282.752	320.859	-0.111589
283.282	321.111	-0.111811
300.734	325.396	-0.11067
301.318	325.669	-0.110595
296.256	325.337	-0.111478
296.806	325.588	-0.111307
291.756	325.337	-0.112418
292.306	325.588	-0.112289
287.256	325.337	-0.112382
287.806	325.588	-0.112405
283.416	326.353	-0.110717
281.437	324.711	-0.110318
281.054	324.167	-0.110322
281.829	324	-0.110751
281.346	323.612	-0.110616
282.091	324.649	-0.110682
300.746	316.388	-0.109614
301.318	316.669	-0.109649
296.256	316.34	-0.110526
296.807	316.587	-0.110437
291.756	316.34	-0.111805
292.307	316.587	-0.111724
287.256	316.34	-0.112341
287.807	316.587	-0.112399
282.756	316.329	-0.11123
283.308	316.581	-0.111492
288.021	330.661	-0.110241
308.396	288.368	-0.110332
309.027	288.193	-0.11041
308.625	288.727	-0.110484
309.229	288.812	-0.110663
312.9	288.368	-0.111468
313.535	288.192	-0.11156
313.125	288.727	-0.111644
313.731	288.81	-0.111835
317.399	288.368	-0.112207
318.028	288.193	-0.112143
317.625	288.727	-0.112354
318.228	288.811	-0.112408
321.9	288.368	-0.11156
322.528	288.193	-0.11124
322.125	288.727	-0.111661
322.726	288.811	-0.111495
301.039	289.093	-0.110531
300.849	289.702	-0.110704
296.539	289.093	-0.111705
296.353	289.698	-0.111906
292.039	289.093	-0.112815
291.853	289.698	-0.113008
287.539	289.093	-0.112748
287.353	289.698	-0.112922
282.754	289.35	-0.110895
283.29	289.607	-0.111321
324.137	285.933	-0.109059
323.474	285.597	-0.109189
324.361	285.354	-0.108551
324.026	284.9	-0.108464
301.085	284.45	-0.108728
300.356	284.679	-0.108947
299.622	284.373	-0.108981
289.958	284.373	-0.110839
289.202	284.667	-0.110906
288.46	284.449	-0.110702
280.054	328.843	-0.107615
280.283	329.578	-0.107248
280.016	330.291	-0.106642
280.046	301.856	-0.110348
280.28	302.593	-0.110263
279.984	303.323	-0.109991
324.454	296.801	-0.112929
324.14	297.22	-0.113042
323.859	296.698	-0.113126
323.645	297.178	-0.113199
305.756	305.992	-0.108531
305.638	305.525	-0.108542
306.183	305.741	-0.108629
306.134	305.151	-0.108666
310.307	305.869	-0.109883
310.178	305.408	-0.109844
310.705	305.667	-0.110038
310.673	305.091	-0.110049
314.807	305.869	-0.111737
314.678	305.408	-0.111682
315.205	305.667	-0.111893
315.173	305.091	-0.111888
319.307	305.869	-0.113088
319.178	305.408	-0.113057
319.705	305.667	-0.113131
319.673	305.091	-0.113123
305.756	310.493	-0.108644
305.637	310.025	-0.108548
306.183	310.241	-0.108697
306.134	309.652	-0.108605
310.307	310.369	-0.110064
310.178	309.908	-0.109936
310.705	310.167	-0.110189
310.673	309.591	-0.110093
314.807	310.369	-0.111979
314.678	309.908	-0.111848
315.205	310.167	-0.112107
315.173	309.591	-0.112011
319.307	310.369	-0.113353
319.178	309.908	-0.113262
319.705	310.167	-0.113372
319.673	309.591	-0.11329
323.79	310.39	-0.113003
323.68	309.969	-0.112973
324.191	310.201	-0.112843
324.127	309.66	-0.112792
305.756	314.993	-0.109571
305.637	314.525	-0.109412
306.183	314.741	-0.109592
306.134	314.152	-0.109416
310.307	314.869	-0.110977
310.178	314.408	-0.110789
310.705	314.667	-0.111077
310.673	314.091	-0.110903
314.807	314.869	-0.112847
314.678	314.408	-0.112667
315.205	314.667	-0.112943
315.173	314.091	-0.112782
319.307	314.869	-0.11411
319.178	314.408	-0.113984
319.705	314.667	-0.114105
319.673	314.091	-0.113976
323.79	314.89	-0.113722
323.681	314.469	-0.113661
324.193	314.702	-0.11355
324.128	314.161	-0.113456
305.756	323.992	-0.111195
305.638	323.525	-0.11117
306.183	323.741	-0.111292
306.134	323.151	-0.111268
310.307	323.869	-0.112612
310.178	323.408	-0.11255
310.705	323.667	-0.112759
310.673	323.091	-0.112727
314.807	323.869	-0.114258
314.678	323.408	-0.114218
315.205	323.667	-0.114382
315.173	323.091	-0.114373
319.307	323.869	-0.115033
319.178	323.408	-0.115067
319.705	323.667	-0.115044
319.673	323.091	-0.115086
305.749	328.487	-0.110222
305.639	328.019	-0.110354
306.177	328.243	-0.110402
306.135	327.647	-0.110582
310.311	328.362	-0.111688
310.179	327.906	-0.111785
310.703	328.162	-0.111898
310.659	327.607	-0.112058
319.311	328.362	-0.113671
319.179	327.906	-0.113869
319.704	328.161	-0.113718
319.659	327.607	-0.113954
283.774	302.011	-0.111858
283.64	301.358	-0.111956
284.409	301.495	-0.112164
283.996	300.884	-0.112171
283.133	301.784	-0.111671
283.253	302.426	-0.111574
283.817	302.705	-0.111716
296.66	306.254	-0.109373
297.411	306.326	-0.109129
296.782	306.894	-0.109254
297.389	307.143	-0.109039
292.16	306.254	-0.110885
292.911	306.326	-0.110619
292.282	306.894	-0.110762
292.889	307.143	-0.110524
287.66	306.254	-0.111781
288.411	306.326	-0.111714
287.782	306.894	-0.111696
288.389	307.143	-0.111617
283.17	306.217	-0.110931
283.861	306.351	-0.111162
283.299	306.878	-0.110894
283.864	307.156	-0.111066
283.161	297.239	-0.112459
283.86	297.354	-0.112713
283.278	297.882	-0.112415
283.865	298.15	-0.112593
296.671	310.76	-0.109339
297.412	310.826	-0.109126
296.783	311.394	-0.109364
297.389	311.643	-0.109214
292.171	310.76	-0.110794
292.912	310.826	-0.110554
292.283	311.394	-0.110803
292.889	311.643	-0.110624
287.671	310.76	-0.111653
288.412	310.826	-0.111604
287.783	311.394	-0.111679
288.389	311.643	-0.111649
283.141	310.738	-0.110757
283.859	310.851	-0.111025
283.29	311.377	-0.110839
283.863	311.656	-0.111062
283.774	293.011	-0.112637
283.64	292.358	-0.112463
284.409	292.495	-0.112809
283.995	291.884	-0.112509
283.133	292.783	-0.112307
283.254	293.426	-0.112457
283.817	293.704	-0.112732
283.771	320.017	-0.112028
283.638	319.362	-0.111957
284.409	319.495	-0.112219
283.995	318.885	-0.112046
283.128	319.796	-0.111773
283.237	320.449	-0.111819
283.823	320.703	-0.112041
296.66	324.254	-0.111546
297.411	324.326	-0.11136
296.782	324.894	-0.111438
297.389	325.143	-0.111252
292.16	324.254	-0.112564
292.911	324.326	-0.11241
292.282	324.894	-0.112441
292.889	325.143	-0.112279
287.66	324.254	-0.112726
288.411	324.326	-0.112782
287.782	324.894	-0.112596
288.389	325.143	-0.112591
283.168	324.244	-0.111348
283.913	324.323	-0.111654
283.287	324.875	-0.111212
283.89	325.114	-0.111404
296.671	315.26	-0.110174
297.412	315.326	-0.109982
296.782	315.899	-0.110288
297.388	316.149	-0.110177
292.171	315.26	-0.111502
292.912	315.326	-0.1113
292.282	315.899	-0.111597
292.888	316.149	-0.111473
287.671	315.26	-0.112205
288.412	315.326	-0.112185
287.782	315.899	-0.1123
288.388	316.149	-0.112313
283.139	315.249	-0.111262
283.859	315.355	-0.111539
283.266	315.887	-0.111393
283.866	316.153	-0.111645
283.772	288.509	-0.111063
283.638	287.837	-0.110629
284.382	288.017	-0.111111
284.001	287.345	-0.110542
283.149	288.278	-0.110594
283.249	288.934	-0.110989
283.827	289.196	-0.111424
324.348	306.268	-0.112564
324.84	306.146	-0.112377
324.572	306.748	-0.112467
325.14	306.655	-0.112245
324.391	324.278	-0.113828
324.897	324.133	-0.11364
324.615	324.799	-0.113566
325.163	324.649	-0.11336
314.644	328.774	-0.112979
314.785	329.188	-0.112824
314.193	329.007	-0.112732
314.306	329.535	-0.112519
323.625	328.779	-0.112268
323.765	329.2	-0.111947
323.181	328.989	-0.112324
323.289	329.536	-0.111952
310.834	287.553	-0.110648
310.71	287.097	-0.110406
311.306	287.33	-0.110657
311.241	286.721	-0.110357
315.355	287.568	-0.111691
315.209	287.081	-0.111428
315.81	287.35	-0.111635
315.74	286.755	-0.111327
319.869	287.575	-0.111698
319.715	287.038	-0.111423
320.409	287.33	-0.111434
320.266	286.78	-0.11115
302.416	302.265	-0.10893
302.439	301.586	-0.109114
303.06	302.016	-0.108939
302.998	301.241	-0.109154
301.407	302.14	-0.109082
301.334	302.866	-0.108891
300.727	302.337	-0.109102
300.749	303.101	-0.108895
307.338	305.757	-0.108866
307.968	306.031	-0.109007
307.273	306.545	-0.108785
307.95	306.68	-0.108952
311.837	305.751	-0.110454
312.467	306.03	-0.110688
311.767	306.533	-0.110387
312.45	306.68	-0.110649
316.337	305.751	-0.112281
316.967	306.03	-0.112471
316.267	306.533	-0.112238
316.95	306.68	-0.112448
320.836	305.75	-0.113163
321.467	306.03	-0.113128
320.767	306.533	-0.113156
321.45	306.68	-0.11312
302.416	297.765	-0.110109
302.439	297.086	-0.110294
303.06	297.516	-0.110105
302.998	296.741	-0.110314
301.407	297.643	-0.110286
301.333	298.378	-0.110077
300.727	297.841	-0.110317
300.751	298.615	-0.110083
307.338	310.257	-0.108965
307.968	310.531	-0.109176
307.273	311.045	-0.109047
307.95	311.18	-0.109253
311.837	310.251	-0.110639
312.467	310.53	-0.110932
311.767	311.033	-0.110711
312.45	311.18	-0.111006
316.337	310.251	-0.112517
316.967	310.53	-0.112752
316.267	311.033	-0.11259
316.95	311.18	-0.112822
320.837	310.251	-0.113413
321.467	310.53	-0.113411
320.767	311.033	-0.113503
321.45	311.18	-0.113483
302.416	293.265	-0.11084
302.439	292.586	-0.110857
303.06	293.016	-0.110768
302.998	292.241	-0.110774
301.407	293.143	-0.111003
301.333	293.878	-0.110954
300.727	293.341	-0.111092
300.751	294.115	-0.111015
302.416	320.265	-0.1105
302.439	319.59	-0.110376
303.06	320.016	-0.110449
302.997	319.244	-0.110288
301.407	320.14	-0.110522
301.334	320.866	-0.110628
300.727	320.337	-0.110583
300.749	321.101	-0.110682
307.338	323.757	-0.111561
307.968	324.031	-0.111726
307.273	324.545	-0.11149
307.95	324.68	-0.11166
311.837	323.751	-0.113163
312.467	324.03	-0.113378
311.767	324.533	-0.113088
312.45	324.68	-0.113312
316.337	323.751	-0.114645
316.967	324.03	-0.114737
316.267	324.533	-0.114539
316.95	324.68	-0.114633
320.836	323.75	-0.114911
321.467	324.03	-0.114751
320.767	324.533	-0.114774
321.45	324.68	-0.114607
307.338	314.757	-0.109861
307.968	315.031	-0.110108
307.273	315.545	-0.11004
307.95	315.68	-0.11026
311.837	314.751	-0.111536
312.467	315.03	-0.111859
311.767	315.533	-0.111702
312.45	315.68	-0.112008
316.337	314.751	-0.113334
316.967	315.03	-0.113579
316.267	315.533	-0.113481
316.95	315.68	-0.113704
320.837	314.751	-0.114135
321.467	315.03	-0.114145
320.767	315.533	-0.114277
321.45	315.68	-0.114254
307.334	328.269	-0.11067
307.965	328.542	-0.110744
307.255	329.079	-0.110324
307.949	329.2	-0.110463
311.835	328.242	-0.112255
312.461	328.529	-0.11235
311.758	328.996	-0.111919
312.45	329.18	-0.11206
316.33	328.278	-0.113516
316.964	328.544	-0.113479
316.248	329.085	-0.113143
316.947	329.198	-0.113166
320.836	328.242	-0.113466
321.462	328.529	-0.113155
320.762	328.999	-0.113091
321.45	329.18	-0.112797
293.03	330.202	-0.110492
292.624	329.898	-0.110703
293.214	329.747	-0.110668
292.788	329.319	-0.110948
284.022	330.218	-0.109011
283.62	329.897	-0.108991
284.18	329.788	-0.109338
283.78	329.322	-0.109417
302.391	288.776	-0.110218
302.462	288.088	-0.109996
303.06	288.517	-0.110047
302.991	287.745	-0.109794
308.812	304.493	-0.109365
309.228	304.82	-0.109484
308.491	304.882	-0.109221
308.703	305.541	-0.109261
307.949	305.352	-0.109043
307.846	304.769	-0.109041
307.318	305.115	-0.108905
313.312	304.493	-0.111084
313.728	304.82	-0.111251
312.991	304.882	-0.110923
313.203	305.541	-0.111008
312.449	305.351	-0.1107
312.346	304.769	-0.110665
311.819	305.114	-0.11047
317.812	304.493	-0.112713
318.228	304.82	-0.112821
317.491	304.882	-0.112612
317.703	305.541	-0.112685
316.949	305.351	-0.112466
316.846	304.769	-0.112424
316.319	305.114	-0.112279
322.312	304.493	-0.113022
322.694	304.793	-0.112963
321.991	304.882	-0.113056
322.192	305.535	-0.113047
321.447	305.35	-0.113122
321.346	304.769	-0.11311
320.819	305.114	-0.113157
299.825	304.761	-0.1087
299.832	305.336	-0.108642
295.301	304.746	-0.109971
295.332	305.336	-0.109898
290.801	304.746	-0.111433
290.832	305.336	-0.111366
286.301	304.746	-0.111879
286.332	305.336	-0.111826
282.951	304.298	-0.111086
282.376	304.213	-0.110822
308.812	308.993	-0.10925
309.228	309.32	-0.109441
308.491	309.382	-0.10917
308.703	310.041	-0.109347
307.949	309.852	-0.109073
307.846	309.269	-0.10895
307.318	309.615	-0.108871
313.312	308.993	-0.111076
313.728	309.32	-0.111304
312.991	309.382	-0.110972
313.203	310.041	-0.111175
312.449	309.851	-0.110822
312.346	309.269	-0.110682
311.819	309.614	-0.110539
317.812	308.993	-0.112786
318.228	309.32	-0.112942
317.491	309.382	-0.112732
317.703	310.041	-0.1129
316.949	309.851	-0.112648
316.846	309.269	-0.11252
316.319	309.614	-0.11242
322.312	308.993	-0.113118
322.728	309.32	-0.113089
321.991	309.382	-0.113197
322.203	310.041	-0.113266
321.449	309.851	-0.113322
321.346	309.269	-0.113239
320.819	309.614	-0.113329
326.306	309.714	-0.111928
325.792	310.094	-0.112195
325.776	309.36	-0.112081
325.277	309.701	-0.112351
299.82	309.207	-0.108381
299.872	309.748	-0.10844
295.32	309.207	-0.109583
295.363	309.756	-0.109627
290.82	309.207	-0.111035
290.863	309.756	-0.111071
286.32	309.207	-0.111489
286.363	309.756	-0.11153
282.11	309.588	-0.110264
281.759	310.115	-0.110123
281.701	309.377	-0.110048
281.215	309.7	-0.109854
282.93	308.818	-0.110607
282.498	309.27	-0.110425
282.356	308.716	-0.110329
282.11	309.133	-0.110238
326.347	300.835	-0.112025
325.85	301.126	-0.112208
325.8	300.374	-0.112237
325.282	300.697	-0.112447
303.839	300.386	-0.109326
303.507	300.852	-0.109224
303.33	300.249	-0.109354
302.848	300.575	-0.109322
282.198	300.65	-0.111493
281.869	301.152	-0.111253
281.734	300.388	-0.111304
281.224	300.767	-0.111029
308.812	313.493	-0.109961
309.228	313.82	-0.110205
308.491	313.882	-0.109939
308.703	314.541	-0.110214
307.949	314.352	-0.109911
307.846	313.769	-0.1097
307.318	314.115	-0.109675
313.312	313.493	-0.11179
313.728	313.82	-0.112061
312.991	313.882	-0.111743
313.203	314.541	-0.112034
312.449	314.351	-0.111662
312.346	313.769	-0.11144
311.819	314.114	-0.11135
317.812	313.493	-0.113439
318.228	313.82	-0.113623
317.491	313.882	-0.113432
317.703	314.541	-0.113664
316.949	314.351	-0.113409
316.846	313.769	-0.113218
316.319	314.114	-0.11317
322.312	313.493	-0.113721
322.728	313.82	-0.113721
321.991	313.882	-0.113836
322.203	314.541	-0.11396
321.449	314.351	-0.114005
321.346	313.769	-0.113872
320.819	314.114	-0.113999
326.352	314.239	-0.112599
325.809	314.618	-0.112905
325.786	313.871	-0.112723
325.271	314.209	-0.113029
299.82	313.707	-0.10901
299.872	314.248	-0.109166
295.32	313.707	-0.110124
295.363	314.256	-0.110271
290.82	313.707	-0.111457
290.863	314.256	-0.111583
286.32	313.707	-0.111814
286.363	314.256	-0.111932
282.109	314.09	-0.110632
281.754	314.626	-0.110564
281.701	313.878	-0.110389
281.193	314.243	-0.110242
282.93	313.318	-0.110863
282.498	313.771	-0.110749
282.356	313.216	-0.110571
282.11	313.633	-0.110542
303.839	295.886	-0.110422
303.507	296.352	-0.110357
303.33	295.749	-0.110453
302.848	296.075	-0.110455
282.949	295.3	-0.112435
282.376	295.212	-0.112135
308.812	322.493	-0.111937
309.228	322.82	-0.112119
308.491	322.882	-0.11185
308.703	323.541	-0.111969
307.949	323.352	-0.111718
307.846	322.769	-0.111637
307.318	323.115	-0.111538
313.312	322.493	-0.113634
313.728	322.82	-0.11382
312.991	322.882	-0.113532
313.203	323.541	-0.113655
312.449	323.351	-0.11337
312.346	322.769	-0.113281
311.819	323.114	-0.113137
317.812	322.493	-0.114916
318.228	322.82	-0.114983
317.491	322.882	-0.114862
317.703	323.541	-0.114893
316.949	323.351	-0.114775
316.846	322.769	-0.114739
316.319	323.114	-0.114657
322.312	322.493	-0.114726
322.694	322.793	-0.114621
321.991	322.882	-0.114765
322.192	323.535	-0.114669
321.447	323.35	-0.114845
321.346	322.769	-0.114888
320.819	323.114	-0.114973
299.825	322.761	-0.110893
299.832	323.336	-0.110939
295.301	322.746	-0.11184
295.332	323.336	-0.111876
290.801	322.746	-0.112804
290.832	323.336	-0.112809
286.301	322.746	-0.11263
286.332	323.336	-0.112606
281.824	322.719	-0.110978
281.859	323.289	-0.110925
308.812	326.993	-0.111495
309.228	327.319	-0.111564
308.491	327.382	-0.111276
308.703	328.041	-0.111163
307.948	327.855	-0.110976
307.846	327.269	-0.1111
307.318	327.616	-0.110873
313.312	326.993	-0.113139
313.72	327.333	-0.113182
312.991	327.382	-0.112914
313.193	328.058	-0.112773
312.449	327.854	-0.112592
312.346	327.269	-0.112725
311.819	327.613	-0.11246
317.812	326.993	-0.114137
318.228	327.319	-0.114061
317.491	327.382	-0.113973
317.703	328.041	-0.113759
316.949	327.857	-0.113755
316.846	327.269	-0.113934
316.318	327.621	-0.113759
322.312	326.993	-0.113604
322.723	327.332	-0.11333
321.991	327.382	-0.113535
322.194	328.058	-0.11317
321.45	327.854	-0.113486
321.346	327.269	-0.113753
320.819	327.613	-0.113752
326.335	327.836	-0.111381
325.794	328.145	-0.111496
325.785	327.389	-0.111883
325.257	327.723	-0.112006
299.82	327.207	-0.110308
299.872	327.748	-0.110159
295.32	327.207	-0.111218
295.363	327.756	-0.111051
290.82	327.207	-0.111953
290.863	327.756	-0.111775
286.32	327.207	-0.111481
286.363	327.756	-0.111276
282.103	327.567	-0.109466
281.761	328.129	-0.108972
281.692	327.371	-0.109318
281.214	327.765	-0.108862
282.929	326.818	-0.110266
282.493	327.264	-0.109828
282.355	326.715	-0.109978
282.11	327.133	-0.109671
326.307	318.735	-0.113344
325.794	319.09	-0.113596
325.783	318.353	-0.113478
325.259	318.689	-0.113758
303.839	318.386	-0.11008
303.507	318.852	-0.110196
303.33	318.249	-0.109996
302.848	318.575	-0.110103
282.199	318.648	-0.111284
281.872	319.145	-0.111183
281.734	318.388	-0.111017
281.244	318.742	-0.110855
311.119	330.743	-0.110925
310.821	330.241	-0.111053
311.588	330.192	-0.11131
311.292	329.657	-0.111472
320.211	330.697	-0.112297
319.86	330.184	-0.11265
320.605	330.191	-0.112457
320.317	329.677	-0.112826
302.243	330.725	-0.108809
301.861	330.073	-0.109115
302.558	330.212	-0.109021
302.366	329.691	-0.109279
300.768	329.802	-0.109277
301.132	330.22	-0.109075
300.482	330.211	-0.109082
300.827	330.734	-0.108847
297.717	330.757	-0.109261
297.336	330.089	-0.109662
298.057	330.212	-0.109414
297.797	329.706	-0.109732
296.252	329.818	-0.110022
296.606	330.201	-0.109775
295.998	330.212	-0.109871
296.308	330.738	-0.109586
293.212	330.658	-0.110231
293.588	330.187	-0.110359
287.242	329.797	-0.110502
287.608	330.167	-0.110403
286.975	330.199	-0.110182
287.327	330.683	-0.110045
284.212	330.664	-0.108838
284.583	330.193	-0.10927
326.307	291.736	-0.111172
325.794	292.09	-0.111562
325.783	291.353	-0.111246
325.259	291.689	-0.111663
303.839	291.386	-0.110615
303.507	291.852	-0.110695
303.33	291.249	-0.110613
302.848	291.575	-0.110725
282.199	291.648	-0.111525
281.873	292.144	-0.111503
281.734	291.389	-0.111152
281.245	291.742	-0.111029
303.848	286.898	-0.109355
303.507	287.354	-0.10958
303.33	286.753	-0.109318
302.85	287.084	-0.109539
324.657	284.239	-0.107678
324.931	284.854	-0.107872
323.649	284.33	-0.108334
301.975	284.406	-0.108551
301.707	285.091	-0.108872
300.951	285.163	-0.109036
297.706	285.148	-0.10982
296.92	285.083	-0.11003
297.707	284.415	-0.109534
296.625	284.395	-0.10984
288.622	285.14	-0.11105
287.85	285.09	-0.11086
287.565	284.415	-0.110454
280.016	327.96	-0.108133
280.69	328.247	-0.108317
280.741	329.016	-0.107868
280.018	300.96	-0.110516
280.667	301.257	-0.110719
280.737	302.022	-0.110583
309.859	332.084	-0.109936
309.548	331.486	-0.110043
310.443	331.33	-0.110451
309.883	331.031	-0.110367
310.884	331.982	-0.110347
327.688	329.058	-0.109978
327.086	329.373	-0.110052
326.938	328.488	-0.110707
326.638	329.046	-0.110504
327.592	328.051	-0.110658
327.695	302.086	-0.111481
327.097	302.397	-0.111642
326.941	301.502	-0.111783
326.642	302.062	-0.111843
327.593	301.061	-0.111591
326.862	309.403	-0.111675
280.691	309.402	-0.109616
326.907	300.496	-0.111834
280.692	300.406	-0.110862
326.878	313.877	-0.112323
280.677	313.877	-0.10996
326.907	327.491	-0.111286
280.682	327.414	-0.108762
326.83	318.388	-0.113099
280.726	318.388	-0.110591
311.449	331.297	-0.110798
320.557	331.219	-0.111936
302.547	331.254	-0.108579
300.488	331.268	-0.108633
298.141	331.303	-0.10893
296.012	331.275	-0.109407
293.496	331.208	-0.109927
287.033	331.22	-0.109675
284.495	331.212	-0.108665
326.829	291.388	-0.110776
280.726	291.388	-0.110622
280.024	284.413	-0.10614
327.549	284.396	-0.105989
296.509	305.615	-0.109506
297.007	305.21	-0.109408
297.029	305.806	-0.109324
297.548	305.618	-0.109185
292.009	305.615	-0.111019
292.507	305.21	-0.110915
292.529	305.806	-0.11083
293.048	305.618	-0.110669
287.509	305.615	-0.111866
288.007	305.21	-0.111898
288.029	305.806	-0.111823
288.548	305.618	-0.111791
283.054	305.578	-0.110968
283.546	305.235	-0.111201
283.53	305.806	-0.111125
284.039	305.639	-0.111313
305.571	306.44	-0.108451
305.253	305.973	-0.108431
296.529	310.146	-0.10933
297.019	309.771	-0.109155
297.033	310.308	-0.1092
297.545	310.14	-0.10903
292.029	310.146	-0.110799
292.519	309.771	-0.110621
292.533	310.308	-0.110655
293.045	310.14	-0.110463
287.529	310.146	-0.111628
288.019	309.771	-0.111594
288.033	310.308	-0.11162
288.545	310.14	-0.111558
283.019	310.129	-0.110686
283.529	309.76	-0.110873
283.515	310.317	-0.110891
284.032	310.145	-0.111057
305.571	310.94	-0.10866
305.253	310.473	-0.108528
296.529	314.646	-0.110065
297.019	314.271	-0.109835
297.033	314.808	-0.10997
297.545	314.64	-0.109781
292.029	314.646	-0.111412
292.519	314.271	-0.111192
292.533	314.808	-0.111311
293.045	314.64	-0.111111
287.529	314.646	-0.112104
288.019	314.271	-0.112032
288.033	314.808	-0.112129
288.545	314.64	-0.112059
283.019	314.633	-0.111123
283.528	314.261	-0.111261
283.515	314.829	-0.111349
284.032	314.646	-0.111493
283.024	296.592	-0.112461
283.535	296.229	-0.112691
283.519	296.799	-0.112652
284.032	296.627	-0.112853
296.509	323.615	-0.111618
297.007	323.21	-0.1115
297.029	323.806	-0.111494
297.548	323.618	-0.111372
292.009	323.615	-0.112651
292.507	323.21	-0.112573
292.529	323.806	-0.112546
293.048	323.618	-0.112442
287.509	323.615	-0.11281
288.007	323.21	-0.112907
288.029	323.806	-0.112846
288.548	323.618	-0.112898
283.021	323.613	-0.111431
283.532	323.23	-0.111727
283.539	323.81	-0.111625
284.048	323.633	-0.111866
305.571	324.44	-0.111119
305.253	323.973	-0.111081
315.134	327.678	-0.113516
315.193	328.245	-0.113328
314.668	328.023	-0.113275
314.789	328.453	-0.113153
324.116	327.707	-0.112601
324.147	328.277	-0.112297
323.664	328.032	-0.112647
323.769	328.467	-0.11238
296.554	328.171	-0.110662
297.032	327.769	-0.110696
297.071	328.329	-0.110493
297.563	328.1	-0.110461
292.06	328.172	-0.111541
292.537	327.77	-0.11163
292.575	328.323	-0.111419
293.068	328.1	-0.11142
287.557	328.17	-0.111414
288.035	327.769	-0.111677
288.077	328.326	-0.111442
288.569	328.1	-0.111603
283.048	328.144	-0.109696
283.549	327.752	-0.110163
283.572	328.309	-0.109889
284.068	328.095	-0.110242
305.571	315.44	-0.109641
305.253	314.973	-0.109452
305.571	328.919	-0.110008
305.252	328.468	-0.110111
306.239	287.651	-0.10979
306.743	288.049	-0.109985
306.243	288.196	-0.109999
305.797	288.039	-0.109905
296.479	300.894	-0.110608
296.932	301.302	-0.110348
296.316	301.558	-0.110469
296.752	301.982	-0.110206
291.979	300.894	-0.112067
292.432	301.302	-0.111827
291.816	301.558	-0.111936
292.252	301.982	-0.111693
287.479	300.894	-0.112779
287.932	301.302	-0.112683
287.316	301.558	-0.112627
287.751	301.981	-0.112528
296.479	296.394	-0.111822
296.932	296.803	-0.11159
296.316	297.058	-0.11172
296.752	297.483	-0.11147
291.979	296.394	-0.113186
292.432	296.802	-0.112989
291.816	297.058	-0.113087
292.252	297.482	-0.112875
287.479	296.394	-0.113645
287.932	296.802	-0.113614
287.316	297.058	-0.11354
287.752	297.482	-0.11349
296.516	318.827	-0.111084
296.935	319.3	-0.111083
296.316	319.558	-0.111291
296.752	319.982	-0.111256
292.016	318.827	-0.11229
292.435	319.299	-0.112283
291.816	319.558	-0.112465
292.252	319.982	-0.112432
287.516	318.827	-0.112762
287.929	319.314	-0.112845
287.316	319.558	-0.112832
287.751	319.98	-0.1129
296.479	291.894	-0.112236
296.932	292.303	-0.112118
296.316	292.558	-0.112309
296.752	292.983	-0.112168
291.979	291.894	-0.113445
292.432	292.302	-0.113391
291.816	292.558	-0.113527
292.252	292.982	-0.113448
287.479	291.894	-0.113577
287.932	292.302	-0.113705
287.316	292.558	-0.113654
287.751	292.981	-0.113755
301.038	287.521	-0.110029
301.426	287.968	-0.11013
300.818	288.083	-0.110275
301.24	288.54	-0.110345
296.509	287.365	-0.111131
296.938	287.828	-0.111188
296.315	288.057	-0.111451
296.753	288.484	-0.111467
291.979	287.457	-0.112224
292.44	287.831	-0.112316
291.836	288.052	-0.112485
292.256	288.494	-0.11259
287.508	287.366	-0.111965
287.939	287.818	-0.112287
287.315	288.058	-0.112257
287.752	288.483	-0.112549
301.027	301.652	-0.109267
301.519	301.608	-0.109223
301.948	301.838	-0.109104
301.896	302.553	-0.10891
301.116	305.508	-0.108451
301.365	305.964	-0.108372
300.696	306.102	-0.108421
301.33	306.514	-0.108306
323.799	297.666	-0.113135
324.457	297.75	-0.11291
324.616	297.258	-0.112875
301.027	297.152	-0.110479
301.519	297.109	-0.110423
301.948	297.338	-0.110297
301.895	298.056	-0.110095
283.681	300.493	-0.112143
283.515	300.865	-0.112015
283.2	300.451	-0.111962
283.012	301.111	-0.111763
301.153	309.994	-0.108334
301.38	310.453	-0.108368
300.71	310.587	-0.10843
301.331	311.013	-0.10843
301.027	292.652	-0.11108
301.519	292.609	-0.111006
301.948	292.838	-0.110932
301.895	293.556	-0.110898
301.028	319.654	-0.110454
301.519	319.609	-0.110425
301.948	319.838	-0.110446
301.896	320.553	-0.110563
301.116	323.508	-0.110853
301.365	323.964	-0.11083
300.696	324.102	-0.110848
301.33	324.514	-0.110779
301.153	314.494	-0.109131
301.38	314.953	-0.109238
300.71	315.087	-0.109306
301.331	315.513	-0.109373
283.681	318.493	-0.111899
283.515	318.865	-0.111878
283.2	318.451	-0.111703
283.012	319.113	-0.11169
301.161	327.977	-0.11001
301.384	328.447	-0.109834
300.714	328.583	-0.1098
301.336	329.003	-0.109607
323.839	288.674	-0.110958
324.124	288.245	-0.110586
324.514	288.617	-0.110585
324.484	287.986	-0.110241
283.681	291.493	-0.11226
283.515	291.865	-0.11229
283.2	291.452	-0.112004
283.012	292.111	-0.1121
325.527	305.247	-0.112091
325.355	306.003	-0.11217
324.839	305.531	-0.112374
300.455	305.484	-0.108533
295.955	305.484	-0.10969
295.779	301.626	-0.110617
291.455	305.484	-0.111193
291.279	301.626	-0.112054
286.955	305.484	-0.111868
286.775	301.626	-0.11258
283.024	304.918	-0.111037
300.513	309.908	-0.108382
295.973	309.961	-0.109472
291.473	309.961	-0.110939
286.973	309.961	-0.111602
282.99	309.487	-0.110649
282.46	309.935	-0.110435
305.538	300.418	-0.10948
305.681	301.042	-0.109369
305.032	300.894	-0.109309
305.266	301.469	-0.109213
300.487	300.573	-0.109618
301.095	300.533	-0.109543
300.769	301.121	-0.109445
301.33	301.124	-0.109369
300.292	301.124	-0.109517
295.779	297.126	-0.111867
291.279	297.126	-0.113186
286.779	297.126	-0.113467
282.443	301.017	-0.111541
282.465	301.593	-0.11143
281.928	302.02	-0.111088
300.513	314.408	-0.10915
295.973	314.461	-0.110165
291.473	314.461	-0.111505
286.973	314.461	-0.112042
282.989	313.987	-0.111002
282.459	314.437	-0.110849
282.479	310.582	-0.110466
281.898	310.971	-0.110211
305.538	295.918	-0.110528
305.681	296.542	-0.110444
305.032	296.394	-0.110399
305.266	296.969	-0.110311
300.487	296.073	-0.110795
301.095	296.033	-0.110707
300.769	296.621	-0.110647
301.33	296.624	-0.110561
300.292	296.624	-0.110727
295.779	292.626	-0.112466
291.279	292.626	-0.113615
286.774	292.626	-0.113556
283.015	295.924	-0.112478
325.527	323.195	-0.11354
325.387	323.983	-0.113452
324.87	323.505	-0.113786
300.455	323.484	-0.110889
295.955	323.484	-0.111742
295.78	319.628	-0.111438
291.455	323.484	-0.112738
291.28	319.628	-0.112576
286.955	323.484	-0.11273
286.776	319.626	-0.112772
282.437	323.481	-0.111175
300.515	327.903	-0.110063
295.973	327.962	-0.110859
291.473	327.962	-0.111672
286.973	327.962	-0.111366
282.991	327.484	-0.109999
282.458	327.938	-0.109476
305.538	318.418	-0.110393
305.681	319.042	-0.110599
305.032	318.894	-0.110419
305.266	319.469	-0.110616
300.514	318.6	-0.110221
301.113	318.573	-0.11018
300.771	319.127	-0.110351
301.333	319.137	-0.110322
300.296	319.117	-0.110384
282.443	319.016	-0.111437
282.465	319.596	-0.111478
281.913	320.024	-0.111229
282.478	315.089	-0.110958
281.902	315.522	-0.110756
282.483	328.594	-0.109122
281.918	329.033	-0.10852
305.538	291.418	-0.110698
305.681	292.042	-0.110791
305.032	291.894	-0.110719
305.266	292.469	-0.110784
324.907	288.16	-0.110113
325.161	288.628	-0.110241
300.484	291.574	-0.111101
301.094	291.534	-0.110994
300.767	292.121	-0.111109
301.329	292.124	-0.111016
300.292	292.124	-0.111195
300.279	288.153	-0.110402
295.782	288.132	-0.111625
291.277	288.141	-0.112571
286.776	288.127	-0.112135
282.444	292.015	-0.111778
282.466	292.594	-0.11193
281.921	293.006	-0.111721
305.529	286.854	-0.109392
305.668	287.487	-0.109678
305.031	287.367	-0.109582
305.244	287.94	-0.109826
306.165	287.074	-0.10954
306.777	287.387	-0.109725
306.72	286.703	-0.109417
301.632	287.448	-0.109899
301.816	287.001	-0.109684
302.279	287.398	-0.109763
302.231	286.739	-0.109492
298.727	305.207	-0.108887
298.7	305.858	-0.108817
298.137	305.404	-0.109031
298.075	306.096	-0.10896
294.227	305.206	-0.11028
294.199	305.858	-0.110209
293.637	305.404	-0.110477
293.575	306.096	-0.110407
289.727	305.206	-0.111624
289.699	305.858	-0.111553
289.137	305.404	-0.111722
289.075	306.096	-0.111645
285.226	305.207	-0.111661
285.195	305.861	-0.111578
284.636	305.409	-0.111508
284.56	306.105	-0.111401
302.72	305.842	-0.108262
303.166	306.206	-0.108209
302.614	306.638	-0.108171
303.288	306.712	-0.108141
298.729	309.703	-0.108653
298.702	310.356	-0.10873
298.14	309.907	-0.108833
298.076	310.596	-0.108916
294.23	309.697	-0.109989
294.202	310.352	-0.110058
293.641	309.905	-0.110226
293.576	310.596	-0.110302
289.73	309.697	-0.111316
289.702	310.352	-0.111366
289.141	309.905	-0.11145
289.076	310.596	-0.111499
285.228	309.698	-0.111342
285.198	310.355	-0.111366
284.635	309.909	-0.111219
284.559	310.605	-0.111226
308.487	301.305	-0.109853
309.18	300.959	-0.110136
308.648	300.686	-0.110015
312.987	301.305	-0.111435
313.68	300.959	-0.111765
313.148	300.686	-0.111592
317.487	301.305	-0.11296
318.18	300.959	-0.11316
317.648	300.686	-0.113056
321.987	301.305	-0.113295
322.679	300.958	-0.11321
322.147	300.685	-0.113306
302.721	310.342	-0.108265
303.166	310.706	-0.108312
302.614	311.137	-0.108361
303.288	311.212	-0.10837
298.729	314.203	-0.109349
298.702	314.856	-0.109535
298.14	314.407	-0.109555
298.076	315.096	-0.109748
294.23	314.197	-0.110596
294.202	314.852	-0.110776
293.641	314.405	-0.110854
293.576	315.096	-0.111039
289.73	314.197	-0.111786
289.702	314.852	-0.111929
289.141	314.405	-0.111935
289.076	315.096	-0.112074
285.228	314.198	-0.111724
285.198	314.855	-0.111831
284.635	314.409	-0.111626
284.56	315.106	-0.111715
308.487	296.805	-0.110838
309.18	296.459	-0.111086
308.648	296.186	-0.110975
312.987	296.805	-0.112235
313.68	296.459	-0.112519
313.148	296.186	-0.112356
317.487	296.805	-0.113513
318.18	296.459	-0.113654
317.648	296.186	-0.113576
321.987	296.805	-0.113566
322.684	296.475	-0.113425
322.148	296.187	-0.113519
298.727	323.207	-0.111095
298.7	323.858	-0.111105
298.137	323.404	-0.111231
298.075	324.096	-0.111224
294.227	323.206	-0.112136
294.199	323.858	-0.11214
293.637	323.404	-0.112297
293.575	324.096	-0.11228
289.727	323.206	-0.112897
289.699	323.858	-0.112851
289.137	323.404	-0.112917
289.075	324.096	-0.112837
285.228	323.206	-0.112322
285.2	323.858	-0.112219
284.64	323.407	-0.112115
284.576	324.096	-0.111963
302.72	323.842	-0.110796
303.166	324.206	-0.110786
302.614	324.638	-0.110725
303.288	324.712	-0.11073
298.729	327.7	-0.110334
298.701	328.346	-0.110122
298.143	327.89	-0.110398
298.078	328.556	-0.11017
294.231	327.694	-0.111312
294.202	328.342	-0.111086
293.656	327.885	-0.111377
293.583	328.557	-0.111133
289.73	327.697	-0.111814
289.702	328.345	-0.111553
289.155	327.884	-0.111731
289.085	328.558	-0.111436
285.231	327.694	-0.110917
285.202	328.342	-0.110592
284.647	327.89	-0.110598
284.583	328.558	-0.110226
308.487	319.305	-0.111377
309.18	318.959	-0.111539
308.648	318.686	-0.11126
312.987	319.305	-0.113116
313.68	318.959	-0.11332
313.148	318.686	-0.113023
317.487	319.305	-0.114605
318.18	318.959	-0.114681
317.648	318.686	-0.114503
321.987	319.305	-0.114763
322.679	318.958	-0.114596
322.147	318.685	-0.114646
302.721	314.842	-0.109147
303.166	315.206	-0.109248
302.614	315.637	-0.109342
303.288	315.712	-0.109368
302.722	328.331	-0.10985
303.161	328.69	-0.109728
302.621	329.075	-0.109548
303.276	329.201	-0.109509
308.487	292.305	-0.111192
309.18	291.959	-0.111331
308.648	291.686	-0.111155
312.987	292.305	-0.112437
313.68	291.959	-0.112601
313.148	291.686	-0.112398
317.487	292.305	-0.11342
318.18	291.959	-0.113412
317.648	291.686	-0.113301
321.987	292.305	-0.113094
322.678	291.958	-0.112805
322.147	291.685	-0.112866
308.459	287.791	-0.110129
309.182	287.448	-0.11015
308.653	287.183	-0.109903
312.959	287.791	-0.111249
313.687	287.454	-0.111277
313.145	287.178	-0.111006
317.459	287.791	-0.111944
318.183	287.454	-0.111779
317.643	287.178	-0.111627
321.959	287.791	-0.111218
322.673	287.433	-0.110733
322.163	287.187	-0.110771
280.57	305.333	-0.10992
281.229	305.373	-0.110189
280.91	306.06	-0.109963
281.564	305.959	-0.110263
280.598	296.367	-0.111368
281.235	296.374	-0.111646
280.931	297.066	-0.111472
281.548	296.935	-0.11176
280.598	287.366	-0.108461
281.259	287.369	-0.10886
280.939	288.068	-0.10912
281.573	287.948	-0.109434
283.05	331.353	-0.107806
282.997	330.727	-0.10813
283.677	331.059	-0.108339
283.516	330.512	-0.108567
292.07	331.326	-0.110108
292	330.717	-0.110385
292.681	331.048	-0.110161
292.517	330.501	-0.110434
306.017	330.352	-0.109474
306.627	330.702	-0.109462
305.923	331.038	-0.109153
306.612	331.375	-0.109181
315.083	330.455	-0.112298
315.621	330.697	-0.112292
314.906	331.03	-0.111995
315.578	331.347	-0.112
324.083	330.454	-0.111017
324.619	330.697	-0.110571
323.905	331.03	-0.110769
324.578	331.347	-0.110216
326.016	305.932	-0.111905
326.288	305.353	-0.111796
326.645	306.06	-0.111661
326.985	305.333	-0.111543
326.013	296.905	-0.112309
326.307	296.324	-0.112158
326.641	297.04	-0.112067
326.957	296.367	-0.111919
325.978	287.942	-0.109358
326.289	287.346	-0.108765
326.614	288.063	-0.109086
326.957	287.366	-0.108416
307.799	301.785	-0.109563
308.037	302.405	-0.109454
312.299	301.785	-0.111079
312.537	302.405	-0.111022
316.799	301.785	-0.112713
317.037	302.405	-0.112665
321.299	301.785	-0.113319
321.537	302.405	-0.113215
307.799	297.285	-0.110577
308.037	297.905	-0.110446
312.299	297.285	-0.111921
312.537	297.905	-0.11185
316.799	297.285	-0.113315
317.037	297.905	-0.113244
321.299	297.285	-0.113648
321.537	297.905	-0.11355
307.799	292.785	-0.111072
308.037	293.405	-0.111078
312.299	292.785	-0.112263
312.537	293.405	-0.112306
316.799	292.785	-0.113397
317.037	293.405	-0.113452
321.299	292.785	-0.113353
321.537	293.405	-0.113376
307.799	319.785	-0.111267
308.037	320.405	-0.111428
312.299	319.785	-0.11294
312.537	320.405	-0.11311
316.799	319.785	-0.114526
317.037	320.405	-0.11464
321.299	319.785	-0.114903
321.537	320.405	-0.114883
307.819	288.288	-0.110195
308.037	288.905	-0.110409
312.336	288.288	-0.111293
312.549	288.911	-0.111547
316.836	288.289	-0.11214
317.049	288.911	-0.112385
321.338	288.289	-0.111692
321.549	288.911	-0.111919
304.757	303.136	-0.108701
305.109	303.721	-0.108638
304.735	304.209	-0.108506
307.252	304.546	-0.108928
307.214	304.034	-0.108975
306.932	303.563	-0.10899
307.305	303.154	-0.109135
307.482	302.566	-0.109297
308.845	302.676	-0.109636
309.303	302.789	-0.109773
309.341	303.294	-0.109687
309.621	303.741	-0.109727
309.222	304.203	-0.109522
311.752	304.546	-0.110463
311.714	304.034	-0.110486
311.432	303.563	-0.11044
311.805	303.154	-0.110628
311.982	302.566	-0.110795
313.345	302.676	-0.111297
313.803	302.789	-0.111474
313.841	303.294	-0.111408
314.121	303.741	-0.111483
313.722	304.203	-0.111266
316.252	304.546	-0.112259
316.214	304.034	-0.112267
315.932	303.563	-0.112215
316.305	303.154	-0.112369
316.482	302.566	-0.112497
317.845	302.676	-0.112848
318.303	302.789	-0.112954
318.341	303.294	-0.112905
318.621	303.741	-0.112943
318.222	304.203	-0.112819
320.752	304.546	-0.113148
320.714	304.034	-0.113155
320.432	303.563	-0.11318
320.805	303.154	-0.113199
320.982	302.566	-0.113246
322.345	302.676	-0.113103
322.803	302.789	-0.113026
322.84	303.293	-0.112977
323.116	303.737	-0.112902
322.712	304.195	-0.11296
325.963	304.76	-0.111903
325.294	304.54	-0.112168
325.218	304.034	-0.112203
324.932	303.563	-0.112337
325.274	303.172	-0.112229
325.389	302.641	-0.112237
325.881	302.582	-0.112051
326.246	302.277	-0.111953
326.614	302.558	-0.111791
304.256	304.633	-0.1084
303.641	304.989	-0.108327
303.268	304.638	-0.108368
302.753	304.485	-0.10841
302.721	304	-0.108485
303.34	302.595	-0.108758
303.778	302.218	-0.10886
304.301	302.685	-0.10876
302.472	303.527	-0.108596
302.793	303.186	-0.108645
302.837	302.685	-0.108765
299.287	305.001	-0.108773
298.747	304.647	-0.108943
300.329	304.045	-0.108742
300.281	303.274	-0.108907
300.605	303.658	-0.108781
299.697	302.664	-0.109153
300.211	302.789	-0.109038
298.852	302.628	-0.109347
299.262	302.326	-0.109339
298.3	304.146	-0.109142
297.975	303.563	-0.109362
298.286	303.197	-0.109354
298.339	302.686	-0.109477
294.787	305.001	-0.110103
294.247	304.647	-0.110334
295.826	304.055	-0.109936
295.863	303.292	-0.110089
296.127	303.68	-0.109927
294.353	302.623	-0.110739
294.765	302.303	-0.110699
293.8	304.146	-0.110576
293.475	303.563	-0.110821
293.786	303.197	-0.110791
293.839	302.686	-0.110913
290.287	305.001	-0.111519
289.747	304.647	-0.111677
291.326	304.055	-0.111425
291.363	303.292	-0.11157
291.627	303.68	-0.111425
289.853	302.623	-0.112055
290.265	302.303	-0.112061
289.3	304.146	-0.111841
288.975	303.563	-0.112012
289.286	303.197	-0.112032
289.339	302.686	-0.112147
285.787	305.001	-0.111778
285.247	304.647	-0.111723
286.826	304.055	-0.112039
286.863	303.292	-0.112179
287.127	303.68	-0.112128
285.347	302.618	-0.112107
285.78	302.298	-0.112263
284.8	304.146	-0.111702
284.476	303.576	-0.111724
284.785	303.203	-0.111871
284.839	302.686	-0.111993
281.553	304.786	-0.110386
281.708	302.6	-0.110842
282.227	302.646	-0.111064
280.871	302.587	-0.110496
281.298	302.279	-0.110745
304.757	307.636	-0.108176
305.109	308.221	-0.108238
304.735	308.709	-0.108189
307.252	309.046	-0.108777
307.214	308.534	-0.108724
306.932	308.063	-0.108641
307.294	307.674	-0.108726
307.513	307.172	-0.108797
307.966	307.155	-0.108923
308.42	306.871	-0.109075
308.781	307.177	-0.109179
309.303	307.289	-0.10937
309.341	307.794	-0.109373
309.621	308.241	-0.109499
309.222	308.703	-0.109365
311.752	309.046	-0.110431
311.714	308.534	-0.110365
311.432	308.063	-0.110233
311.794	307.674	-0.110362
312.013	307.172	-0.110451
312.466	307.155	-0.110633
312.92	306.871	-0.110829
313.281	307.177	-0.110972
313.803	307.289	-0.111208
313.841	307.794	-0.111223
314.121	308.241	-0.111373
313.722	308.703	-0.111219
316.252	309.046	-0.112316
316.214	308.534	-0.11225
315.932	308.063	-0.112127
316.294	307.674	-0.112232
316.513	307.172	-0.112299
316.966	307.155	-0.112439
317.42	306.871	-0.112577
317.781	307.177	-0.112673
318.303	307.289	-0.112821
318.341	307.794	-0.112835
318.621	308.241	-0.112931
318.222	308.703	-0.11286
320.752	309.046	-0.113252
320.714	308.534	-0.1132
320.432	308.063	-0.113172
320.794	307.674	-0.113152
321.013	307.172	-0.113138
321.466	307.155	-0.11311
321.92	306.871	-0.113068
322.281	307.177	-0.113021
322.803	307.289	-0.112943
322.841	307.794	-0.112946
323.121	308.241	-0.112914
322.722	308.703	-0.113021
325.217	309.055	-0.11228
325.214	308.534	-0.112228
324.932	308.063	-0.112314
325.294	307.669	-0.112155
325.442	307.148	-0.112099
325.866	307.071	-0.111926
326.217	306.656	-0.1118
326.805	306.893	-0.111567
304.256	309.133	-0.108154
303.641	309.489	-0.108144
303.268	309.138	-0.108096
302.753	308.985	-0.108093
302.724	308.501	-0.108064
303.414	307.17	-0.10809
303.821	306.896	-0.108128
304.305	307.227	-0.108138
302.485	308.032	-0.108073
302.814	307.683	-0.108065
302.948	307.198	-0.108091
299.288	309.483	-0.1085
298.747	309.147	-0.108586
300.309	307.666	-0.108301
299.709	307.138	-0.108425
300.21	307.201	-0.108349
298.866	307.131	-0.108597
299.288	306.844	-0.108536
298.3	308.646	-0.108676
297.978	308.071	-0.108775
298.299	307.699	-0.1087
298.373	307.179	-0.108723
294.789	309.467	-0.10977
294.247	309.147	-0.109929
295.81	307.662	-0.109452
295.205	307.144	-0.109678
295.697	307.196	-0.109528
294.366	307.131	-0.109955
294.788	306.844	-0.109849
293.8	308.646	-0.110074
293.478	308.071	-0.110209
293.799	307.699	-0.11011
293.873	307.179	-0.110133
290.289	309.467	-0.111171
289.747	309.147	-0.11127
291.31	307.662	-0.110948
290.705	307.144	-0.11114
291.197	307.196	-0.111021
289.866	307.131	-0.111328
290.288	306.844	-0.111273
289.3	308.646	-0.111353
288.978	308.071	-0.111434
289.299	307.699	-0.111396
289.373	307.179	-0.111432
285.789	309.468	-0.111425
285.247	309.147	-0.111317
286.81	307.662	-0.111583
286.205	307.144	-0.111566
286.697	307.196	-0.111619
285.366	307.131	-0.111435
285.788	306.844	-0.111544
284.8	308.646	-0.111222
284.48	308.074	-0.111166
284.798	307.7	-0.111269
284.873	307.179	-0.111334
281.747	307.084	-0.110167
282.266	307.14	-0.110398
280.751	306.893	-0.109763
281.354	306.672	-0.110054
304.757	298.636	-0.109781
305.114	299.22	-0.109672
304.752	299.708	-0.109516
308.787	300.124	-0.110147
308.161	300.467	-0.109917
307.782	300.17	-0.109884
307.252	300.046	-0.109807
307.214	299.534	-0.109902
306.932	299.063	-0.109965
307.305	298.654	-0.11012
307.482	298.066	-0.110303
308.845	298.176	-0.110589
309.303	298.289	-0.110705
309.345	298.786	-0.110592
309.619	299.25	-0.110587
309.234	299.702	-0.110361
313.287	300.124	-0.111715
312.661	300.467	-0.111435
312.282	300.17	-0.111345
311.752	300.046	-0.111188
311.714	299.534	-0.111261
311.432	299.063	-0.111259
311.805	298.654	-0.111459
311.982	298.066	-0.111642
313.345	298.176	-0.112082
313.803	298.289	-0.112233
313.845	298.786	-0.112145
314.119	299.25	-0.112172
313.734	299.702	-0.111946
317.787	300.124	-0.113125
317.161	300.467	-0.112951
316.782	300.17	-0.112885
316.252	300.046	-0.112769
316.214	299.534	-0.112818
315.932	299.063	-0.112813
316.305	298.654	-0.112965
316.482	298.066	-0.113105
317.845	298.176	-0.113374
318.303	298.289	-0.113452
318.345	298.786	-0.113385
318.619	299.25	-0.113386
318.234	299.702	-0.113259
322.287	300.124	-0.113301
321.661	300.467	-0.11337
321.282	300.17	-0.113419
320.752	300.046	-0.113467
320.714	299.534	-0.113499
320.432	299.063	-0.113551
320.805	298.654	-0.113563
320.982	298.066	-0.113606
322.345	298.176	-0.113416
322.803	298.289	-0.11333
322.845	298.786	-0.113282
323.12	299.247	-0.113198
322.733	299.701	-0.113247
325.239	300.04	-0.112472
325.214	299.534	-0.112495
324.932	299.063	-0.112629
325.274	298.672	-0.112515
325.388	298.14	-0.112507
325.868	298.073	-0.112318
326.22	297.65	-0.112207
326.808	297.889	-0.111974
304.309	300.147	-0.109388
302.752	300.046	-0.109442
302.723	299.5	-0.109571
303.34	298.095	-0.109903
[truncated: 4,673 more rows]

## Sheet: Figure-14-a-b
300.289	308.936	-0.1452
300.838	308.878	-0.145446
300.407	309.377	-0.145229
301.011	309.448	-0.145471
295.789	308.936	-0.142293
296.324	308.918	-0.142788
295.907	309.376	-0.142372
296.449	309.53	-0.142838
291.289	308.936	-0.13718
291.824	308.918	-0.13793
291.407	309.376	-0.137312
291.949	309.53	-0.138036
286.789	308.936	-0.130098
287.324	308.918	-0.131066
286.907	309.376	-0.130277
287.449	309.53	-0.131224
300.289	313.436	-0.143772
300.838	313.378	-0.144048
300.407	313.877	-0.143604
301.011	313.948	-0.143818
295.789	313.436	-0.140838
296.324	313.418	-0.141339
295.907	313.876	-0.140731
296.449	314.03	-0.141128
291.289	313.436	-0.135747
291.824	313.418	-0.136498
291.407	313.876	-0.135704
291.949	314.03	-0.136359
286.789	313.436	-0.12869
287.324	313.418	-0.129662
286.907	313.876	-0.128702
287.449	314.03	-0.129585
282.289	322.438	-0.111617
282.824	322.418	-0.112718
282.408	322.876	-0.111245
282.947	323.035	-0.112092
300.289	326.936	-0.127056
300.838	326.878	-0.127388
300.407	327.377	-0.126312
301.013	327.444	-0.12643
295.789	326.936	-0.124314
296.324	326.918	-0.124788
295.907	327.376	-0.123622
296.455	327.533	-0.123775
291.289	326.936	-0.119597
291.824	326.918	-0.12032
291.407	327.376	-0.118962
291.961	327.538	-0.119369
286.789	326.936	-0.112745
287.324	326.918	-0.113716
286.907	327.376	-0.112162
287.456	327.533	-0.112826
282.774	302.723	-0.121687
283.21	303.128	-0.122711
282.503	303.191	-0.121277
282.758	303.709	-0.121975
300.728	307.947	-0.145425
301.296	308.242	-0.145645
300.503	308.473	-0.145307
296.228	307.947	-0.142745
296.768	308.337	-0.143203
296.003	308.473	-0.142508
291.728	307.947	-0.137849
292.268	308.337	-0.138568
291.503	308.473	-0.137499
287.228	307.947	-0.130949
287.768	308.337	-0.131894
287.003	308.473	-0.130504
282.803	307.214	-0.122692
283.231	307.609	-0.123532
282.503	307.691	-0.122031
282.761	308.212	-0.122528
300.728	312.447	-0.14443
301.296	312.742	-0.144531
300.503	312.973	-0.144083
296.228	312.447	-0.141697
296.768	312.837	-0.141997
296.003	312.973	-0.141245
291.728	312.447	-0.136796
292.268	312.837	-0.137362
291.503	312.973	-0.136245
287.228	312.447	-0.129907
287.768	312.837	-0.130705
287.003	312.973	-0.129268
282.789	311.707	-0.121895
283.229	312.108	-0.122615
282.503	312.191	-0.121088
282.761	312.712	-0.121394
282.774	293.722	-0.113446
283.21	294.128	-0.1149
282.503	294.191	-0.113496
282.758	294.709	-0.114718
282.728	321.447	-0.113819
283.262	321.842	-0.114385
282.503	321.973	-0.112658
300.728	325.947	-0.128989
301.296	326.242	-0.128692
300.503	326.473	-0.127965
296.228	325.947	-0.126425
296.768	326.337	-0.126168
296.003	326.473	-0.12531
291.728	325.947	-0.121908
292.268	326.337	-0.121905
291.503	326.473	-0.12069
287.228	325.947	-0.115259
287.768	326.337	-0.115513
287.003	326.473	-0.113934
282.808	325.223	-0.108267
283.232	325.61	-0.108444
282.503	325.691	-0.106793
282.761	326.212	-0.106408
288.744	330.689	-0.108893
288.343	330.051	-0.109472
289.031	330.172	-0.110289
288.795	329.688	-0.110876
295.341	301.966	-0.14054
296.004	302.161	-0.141229
295.372	302.535	-0.140812
295.911	302.815	-0.141426
290.841	301.966	-0.135366
291.504	302.161	-0.136369
290.872	302.535	-0.135633
291.411	302.815	-0.136495
286.329	301.965	-0.128136
287	302.153	-0.129427
286.372	302.535	-0.128431
286.911	302.815	-0.129514
295.341	297.466	-0.136994
296.004	297.661	-0.137745
295.372	298.035	-0.137555
295.906	298.32	-0.138279
290.841	297.466	-0.132035
291.504	297.661	-0.133109
290.872	298.035	-0.132581
291.406	298.32	-0.133554
286.341	297.466	-0.124876
287.004	297.661	-0.126252
286.372	298.035	-0.12543
286.906	298.32	-0.126639
282.728	298.947	-0.119191
283.293	299.349	-0.120686
282.505	299.522	-0.119185
282.919	299.983	-0.120414
295.341	292.966	-0.131269
296.004	293.161	-0.132082
295.372	293.535	-0.132101
295.906	293.82	-0.13293
290.841	292.966	-0.126454
291.504	293.161	-0.12761
290.872	293.535	-0.127292
291.406	293.82	-0.128392
286.329	292.965	-0.119278
286.999	293.154	-0.120766
286.372	293.535	-0.120156
286.906	293.82	-0.121516
295.341	319.966	-0.134733
296.004	320.161	-0.135076
295.372	320.535	-0.133995
295.911	320.815	-0.134115
290.841	319.966	-0.129681
291.504	320.161	-0.130337
290.872	320.535	-0.12898
291.411	320.815	-0.129356
286.33	319.965	-0.122552
287	320.153	-0.123524
286.372	320.535	-0.121897
286.911	320.815	-0.122511
300.7	316.942	-0.141356
301.296	317.242	-0.141319
300.49	317.526	-0.140709
300.85	317.974	-0.140438
296.228	316.947	-0.138682
296.779	317.323	-0.138811
295.997	317.515	-0.137947
296.373	317.95	-0.137878
291.728	316.947	-0.133904
292.279	317.323	-0.13431
291.497	317.515	-0.133085
291.873	317.95	-0.133212
287.228	316.947	-0.127102
287.779	317.323	-0.127761
286.997	317.515	-0.126198
287.373	317.95	-0.126501
282.728	316.947	-0.118659
283.293	317.349	-0.119475
282.505	317.522	-0.117711
282.919	317.983	-0.118168
299.819	288.482	-0.126144
300.502	288.675	-0.126702
299.844	289.059	-0.12719
300.405	289.323	-0.127835
295.341	288.466	-0.123625
296.003	288.661	-0.124502
295.372	289.035	-0.124675
295.906	289.32	-0.125606
290.819	288.48	-0.118806
291.506	288.667	-0.120057
290.845	289.057	-0.119885
291.406	289.321	-0.1211
286.33	288.465	-0.111555
286.999	288.654	-0.113133
286.372	289.035	-0.112678
286.906	289.32	-0.11417
282.728	289.947	-0.107133
283.287	290.354	-0.109051
282.505	290.522	-0.107678
282.919	290.983	-0.109393
308.395	301.883	-0.143266
309.03	301.691	-0.142855
308.625	302.227	-0.14337
309.232	302.305	-0.143145
312.895	301.883	-0.14021
313.53	301.691	-0.139482
313.125	302.227	-0.140203
313.732	302.305	-0.139671
317.395	301.883	-0.134941
318.03	301.691	-0.133923
317.625	302.227	-0.134826
318.232	302.305	-0.134019
321.895	301.883	-0.127703
322.53	301.691	-0.126437
322.125	302.227	-0.1275
322.73	302.306	-0.126464
300.849	304.184	-0.144837
300.882	304.877	-0.145099
300.352	304.52	-0.144756
300.275	304.99	-0.144898
296.328	304.215	-0.142324
296.349	304.913	-0.142569
295.828	304.522	-0.141975
295.753	305	-0.142068
296.539	302.593	-0.141878
296.36	303.185	-0.141976
291.828	304.215	-0.137554
291.849	304.913	-0.137791
291.328	304.522	-0.136954
291.253	305	-0.136999
292.039	302.593	-0.137266
291.86	303.185	-0.137253
287.328	304.215	-0.130732
287.349	304.913	-0.130968
286.828	304.522	-0.129919
286.753	305	-0.129929
287.539	302.593	-0.130559
287.36	303.185	-0.130459
282.588	304.683	-0.121961
282.471	305.296	-0.121884
282.104	304.75	-0.121004
281.834	305.335	-0.12064
283.414	303.851	-0.123363
300.734	307.396	-0.145444
301.318	307.669	-0.145661
296.256	307.337	-0.142801
296.806	307.588	-0.143262
291.756	307.337	-0.137928
292.306	307.588	-0.138655
287.256	307.337	-0.131044
287.806	307.588	-0.132001
283.415	308.353	-0.123859
308.395	297.383	-0.139171
309.03	297.191	-0.138658
308.625	297.727	-0.139443
309.232	297.805	-0.139244
312.895	297.383	-0.136124
313.53	297.191	-0.135319
313.125	297.727	-0.136286
313.732	297.805	-0.135802
317.395	297.383	-0.130946
318.03	297.191	-0.129844
317.625	297.727	-0.130992
318.232	297.805	-0.130222
321.895	297.383	-0.123716
322.53	297.191	-0.122356
322.125	297.727	-0.12367
322.721	297.811	-0.122684
296.539	298.093	-0.138582
296.353	298.698	-0.138992
292.039	298.093	-0.134194
291.853	298.698	-0.134472
287.539	298.093	-0.127582
287.353	298.698	-0.12776
282.764	298.325	-0.118773
283.31	298.579	-0.120099
300.734	311.896	-0.144685
301.318	312.169	-0.144797
296.256	311.837	-0.142002
296.806	312.087	-0.142366
291.756	311.837	-0.13711
292.306	312.087	-0.137741
287.256	311.837	-0.130228
287.806	312.087	-0.131092
283.415	312.852	-0.122671
308.395	292.883	-0.133043
309.03	292.691	-0.132441
308.625	293.227	-0.133463
309.232	293.305	-0.13329
312.895	292.883	-0.130011
313.53	292.691	-0.129127
313.125	293.227	-0.130331
313.732	293.305	-0.129887
317.395	292.883	-0.124885
318.03	292.691	-0.123694
317.625	293.227	-0.125094
318.232	293.305	-0.124358
321.895	292.883	-0.117625
322.53	292.691	-0.11616
322.125	293.227	-0.117742
322.73	293.306	-0.116757
296.539	293.593	-0.133096
296.353	294.198	-0.133796
292.039	293.593	-0.128894
291.853	294.198	-0.129481
287.539	293.593	-0.12234
287.353	294.198	-0.122831
282.59	295.682	-0.115649
282.483	296.299	-0.116181
282.107	295.747	-0.114729
281.826	296.313	-0.114875
283.413	294.851	-0.116273
308.395	319.883	-0.138379
309.03	319.691	-0.138397
308.625	320.227	-0.137843
309.232	320.305	-0.137539
312.895	319.883	-0.135784
313.53	319.691	-0.135485
313.125	320.227	-0.135151
313.732	320.305	-0.134554
317.395	319.883	-0.13093
318.03	319.691	-0.130301
317.625	320.227	-0.130196
318.232	320.305	-0.129292
321.895	319.883	-0.123866
322.53	319.691	-0.122955
322.125	320.227	-0.123037
322.73	320.306	-0.121873
300.849	322.184	-0.135158
300.882	322.877	-0.134165
300.352	322.52	-0.134468
300.275	322.99	-0.133752
296.328	322.215	-0.132562
296.349	322.913	-0.131573
295.828	322.522	-0.131703
295.753	323	-0.130951
296.539	320.593	-0.134958
296.36	321.185	-0.134015
291.828	322.215	-0.128035
291.849	322.913	-0.127072
291.328	322.522	-0.126951
291.253	323	-0.126176
292.039	320.593	-0.130483
291.86	321.185	-0.129475
287.328	322.215	-0.121402
287.349	322.913	-0.120459
286.828	322.522	-0.120093
286.753	323	-0.119292
287.539	320.593	-0.123916
287.36	321.185	-0.122839
282.752	320.859	-0.114659
283.282	321.111	-0.115399
300.734	325.396	-0.12997
301.318	325.669	-0.129714
296.256	325.337	-0.127528
296.806	325.588	-0.127523
291.756	325.337	-0.123022
292.306	325.588	-0.123271
287.256	325.337	-0.116387
287.806	325.588	-0.116897
283.416	326.353	-0.107503
281.437	324.711	-0.106409
281.054	324.167	-0.106605
281.829	324	-0.108386
281.346	323.612	-0.108068
282.091	324.649	-0.107817
300.746	316.388	-0.141895
301.318	316.669	-0.141864
296.256	316.34	-0.139262
296.807	316.587	-0.139507
291.756	316.34	-0.134475
292.307	316.587	-0.134989
287.256	316.34	-0.127671
287.807	316.587	-0.128431
282.756	316.329	-0.119249
283.308	316.581	-0.120153
288.021	330.661	-0.107795
308.396	288.368	-0.125165
309.027	288.193	-0.124525
308.625	288.727	-0.125726
309.229	288.812	-0.125582
312.9	288.368	-0.122085
313.535	288.192	-0.121158
313.125	288.727	-0.122555
313.731	288.81	-0.12214
317.399	288.368	-0.116907
318.028	288.193	-0.115676
317.625	288.727	-0.117274
318.228	288.811	-0.11657
321.9	288.368	-0.109554
322.528	288.193	-0.108043
322.125	288.727	-0.109834
322.726	288.811	-0.108877
301.039	289.093	-0.127588
300.849	289.702	-0.128623
296.539	289.093	-0.125671
296.353	289.698	-0.12661
292.039	289.093	-0.1215
291.853	289.698	-0.122343
287.539	289.093	-0.114901
287.353	289.698	-0.115657
282.754	289.35	-0.106131
283.29	289.607	-0.107719
324.137	285.933	-0.100384
323.474	285.597	-0.101042
324.361	285.354	-0.098784
324.026	284.9	-0.0985888
301.085	284.45	-0.119037
300.356	284.679	-0.119261
299.622	284.373	-0.118505
289.958	284.373	-0.109883
289.202	284.667	-0.109273
288.46	284.449	-0.107686
280.054	328.843	-0.0962562
280.283	329.578	-0.0952405
280.016	330.291	-0.0933559
280.046	301.856	-0.116084
280.28	302.593	-0.116857
279.984	303.323	-0.116604
324.454	296.801	-0.118265
324.14	297.22	-0.119365
323.859	296.698	-0.11929
323.645	297.178	-0.120268
305.756	305.992	-0.145875
305.638	305.525	-0.145764
306.183	305.741	-0.145742
306.134	305.151	-0.145571
310.307	305.869	-0.144154
310.178	305.408	-0.144086
310.705	305.667	-0.143829
310.673	305.091	-0.143654
314.807	305.869	-0.14016
314.678	305.408	-0.140155
315.205	305.667	-0.13963
315.173	305.091	-0.139466
319.307	305.869	-0.134016
319.178	305.408	-0.134068
319.705	305.667	-0.133308
319.673	305.091	-0.133157
305.756	310.493	-0.14586
305.637	310.025	-0.145955
306.183	310.241	-0.145851
306.134	309.652	-0.145944
310.307	310.369	-0.144306
310.178	309.908	-0.144446
310.705	310.167	-0.144082
310.673	309.591	-0.144167
314.807	310.369	-0.140394
314.678	309.908	-0.140594
315.205	310.167	-0.13996
315.173	309.591	-0.140051
319.307	310.369	-0.134294
319.178	309.908	-0.134546
319.705	310.167	-0.133676
319.673	309.591	-0.133774
323.79	310.39	-0.126395
323.68	309.969	-0.126644
324.191	310.201	-0.125641
324.127	309.66	-0.125807
305.756	314.993	-0.143778
305.637	314.525	-0.144097
306.183	314.741	-0.143898
306.134	314.152	-0.144272
310.307	314.869	-0.142375
310.178	314.408	-0.142734
310.705	314.667	-0.142259
310.673	314.091	-0.142619
314.807	314.869	-0.138593
314.678	314.408	-0.139004
315.205	314.667	-0.138265
315.173	314.091	-0.138621
319.307	314.869	-0.132598
319.178	314.408	-0.133056
319.705	314.667	-0.132076
319.673	314.091	-0.132432
323.79	314.89	-0.124726
323.681	314.469	-0.125163
324.193	314.702	-0.124056
324.128	314.161	-0.12446
305.756	323.992	-0.133144
305.638	323.525	-0.133888
306.183	323.741	-0.133505
306.134	323.151	-0.134422
310.307	323.869	-0.132051
310.178	323.408	-0.132827
310.705	323.667	-0.132149
310.673	323.091	-0.13304
314.807	323.869	-0.128623
314.678	323.408	-0.129457
315.205	323.667	-0.128516
315.173	323.091	-0.129413
319.307	323.869	-0.122869
319.178	323.408	-0.123767
319.705	323.667	-0.122554
319.673	323.091	-0.123462
305.749	328.487	-0.125189
305.639	328.019	-0.126066
306.177	328.243	-0.125611
306.135	327.647	-0.126721
310.311	328.362	-0.124169
310.179	327.906	-0.12508
310.703	328.162	-0.124328
310.659	327.607	-0.125378
319.311	328.362	-0.114973
319.179	327.906	-0.116032
319.704	328.161	-0.114728
319.659	327.607	-0.115836
283.774	302.011	-0.123371
283.64	301.358	-0.122772
284.409	301.495	-0.124336
283.996	300.884	-0.123189
283.133	301.784	-0.121995
283.253	302.426	-0.12253
283.817	302.705	-0.123757
296.66	306.254	-0.143098
297.411	306.326	-0.143665
296.782	306.894	-0.14324
297.389	307.143	-0.143696
292.16	306.254	-0.138441
292.911	306.326	-0.139381
292.282	306.894	-0.138632
292.889	307.143	-0.139387
287.66	306.254	-0.131735
288.411	306.326	-0.132998
287.782	306.894	-0.131973
288.389	307.143	-0.132988
283.17	306.217	-0.123407
283.861	306.351	-0.12477
283.299	306.878	-0.123688
283.864	307.156	-0.124799
283.161	297.239	-0.118576
283.86	297.354	-0.120085
283.278	297.882	-0.119427
283.865	298.15	-0.12084
296.671	310.76	-0.142755
297.412	310.826	-0.143297
296.783	311.394	-0.142629
297.389	311.643	-0.14299
292.171	310.76	-0.138057
292.912	310.826	-0.138961
292.283	311.394	-0.137988
292.889	311.643	-0.138646
287.671	310.76	-0.13134
288.412	310.826	-0.132561
287.783	311.394	-0.131322
288.389	311.643	-0.132244
283.141	310.738	-0.122938
283.859	310.851	-0.124312
283.29	311.377	-0.123021
283.863	311.656	-0.124047
283.774	293.011	-0.11446
283.64	292.358	-0.113188
284.409	292.495	-0.11493
283.995	291.884	-0.113139
283.133	292.783	-0.112818
283.254	293.426	-0.114014
283.817	293.704	-0.115551
283.771	320.017	-0.117732
283.638	319.362	-0.118225
284.409	319.495	-0.119561
283.995	318.885	-0.119431
283.128	319.796	-0.116727
283.237	320.449	-0.116155
283.823	320.703	-0.116991
296.66	324.254	-0.129706
297.411	324.326	-0.130115
296.782	324.894	-0.128712
297.389	325.143	-0.128704
292.16	324.254	-0.125373
292.911	324.326	-0.126125
292.282	324.894	-0.124444
292.889	325.143	-0.124715
287.66	324.254	-0.118921
288.411	324.326	-0.120031
287.782	324.894	-0.118055
288.389	325.143	-0.118618
283.168	324.244	-0.110653
283.913	324.323	-0.111988
283.287	324.875	-0.109832
283.89	325.114	-0.110613
296.671	315.26	-0.140501
297.412	315.326	-0.141008
296.782	315.899	-0.140083
297.388	316.149	-0.14032
292.171	315.26	-0.135871
292.912	315.326	-0.136734
292.282	315.899	-0.135528
292.888	316.149	-0.136063
287.671	315.26	-0.129218
288.412	315.326	-0.130405
287.782	315.899	-0.12894
288.388	316.149	-0.12975
283.139	315.249	-0.120834
283.859	315.355	-0.122172
283.266	315.887	-0.120621
283.866	316.153	-0.121596
283.772	288.509	-0.106678
283.638	287.837	-0.105112
284.382	288.017	-0.106958
284.001	287.345	-0.104886
283.149	288.278	-0.104955
283.249	288.934	-0.106402
283.827	289.196	-0.108077
324.348	306.268	-0.125144
324.84	306.146	-0.124156
324.572	306.748	-0.124788
325.14	306.655	-0.123665
324.391	324.278	-0.113206
324.897	324.133	-0.112443
324.615	324.799	-0.111884
325.163	324.649	-0.111052
314.644	328.774	-0.120129
314.785	329.188	-0.119184
314.193	329.007	-0.120098
314.306	329.535	-0.118973
323.625	328.779	-0.106591
323.765	329.2	-0.105486
323.181	328.989	-0.10701
323.289	329.536	-0.10573
310.834	287.553	-0.122226
310.71	287.097	-0.121424
311.306	287.33	-0.121428
311.241	286.721	-0.120292
315.355	287.568	-0.118025
315.209	287.081	-0.117239
315.81	287.35	-0.117031
315.74	286.755	-0.115942
319.869	287.575	-0.111601
319.715	287.038	-0.110786
320.409	287.33	-0.110172
320.266	286.78	-0.109319
302.416	302.265	-0.144343
302.439	301.586	-0.143944
303.06	302.016	-0.144249
302.998	301.241	-0.143747
301.407	302.14	-0.144098
301.334	302.866	-0.144444
300.727	302.337	-0.143994
300.749	303.101	-0.144359
307.338	305.757	-0.145434
307.968	306.031	-0.145278
307.273	306.545	-0.145611
307.95	306.68	-0.145392
311.837	305.751	-0.142976
312.467	306.03	-0.142507
311.767	306.533	-0.143207
312.45	306.68	-0.142643
316.337	305.751	-0.138214
316.967	306.03	-0.137444
316.267	306.533	-0.138488
316.95	306.68	-0.137596
320.836	305.75	-0.131404
321.467	306.03	-0.130375
320.767	306.533	-0.131708
321.45	306.68	-0.130536
302.416	297.765	-0.140615
302.439	297.086	-0.139874
303.06	297.516	-0.140375
302.998	296.741	-0.139486
301.407	297.643	-0.14035
301.333	298.378	-0.141077
300.727	297.841	-0.140378
300.751	298.615	-0.14114
307.338	310.257	-0.145566
307.968	310.531	-0.145302
307.273	311.045	-0.145384
307.95	311.18	-0.145117
311.837	310.251	-0.143214
312.467	310.53	-0.14263
311.767	311.033	-0.143086
312.45	311.18	-0.142468
316.337	310.251	-0.13852
316.967	310.53	-0.137634
316.267	311.033	-0.138446
316.95	311.18	-0.137495
320.837	310.251	-0.131738
321.467	310.53	-0.130589
320.767	311.033	-0.131704
321.45	311.18	-0.130468
302.416	293.265	-0.134775
302.439	292.586	-0.133738
303.06	293.016	-0.13441
302.998	292.241	-0.133188
301.407	293.143	-0.134485
301.333	293.878	-0.135538
300.727	293.341	-0.134624
300.751	294.115	-0.13573
302.416	320.265	-0.138238
302.439	319.59	-0.139104
303.06	320.016	-0.138653
302.997	319.244	-0.139606
301.407	320.14	-0.138159
301.334	320.866	-0.137169
300.727	320.337	-0.13765
300.749	321.101	-0.136625
307.338	323.757	-0.133263
307.968	324.031	-0.132652
307.273	324.545	-0.131979
307.95	324.68	-0.131564
311.837	323.751	-0.131282
312.467	324.03	-0.130374
311.767	324.533	-0.130052
312.45	324.68	-0.129299
316.337	323.751	-0.127072
316.967	324.03	-0.125844
316.267	324.533	-0.125888
316.95	324.68	-0.124784
320.836	323.75	-0.120536
321.467	324.03	-0.119
320.767	324.533	-0.119386
321.45	324.68	-0.11795
307.338	314.757	-0.143627
307.968	315.031	-0.14324
307.273	315.545	-0.143057
307.95	315.68	-0.142735
311.837	314.751	-0.141383
312.467	315.03	-0.140683
311.767	315.533	-0.140874
312.45	315.68	-0.140205
316.337	314.751	-0.136818
316.967	315.03	-0.135818
316.267	315.533	-0.136378
316.95	315.68	-0.135377
320.837	314.751	-0.130116
321.467	315.03	-0.128847
320.767	315.533	-0.129727
321.45	315.68	-0.12843
307.334	328.269	-0.125356
307.965	328.542	-0.124672
307.255	329.079	-0.123814
307.949	329.2	-0.123395
311.835	328.242	-0.123446
312.461	328.529	-0.122438
311.758	328.996	-0.122046
312.45	329.18	-0.121173
316.33	328.278	-0.119179
316.964	328.544	-0.117873
316.248	329.085	-0.117713
316.947	329.198	-0.116608
320.836	328.242	-0.112672
321.462	328.529	-0.111019
320.762	328.999	-0.111319
321.45	329.18	-0.109749
293.03	330.202	-0.115542
292.624	329.898	-0.115668
293.214	329.747	-0.116599
292.788	329.319	-0.116963
284.022	330.218	-0.101404
283.62	329.897	-0.101233
284.18	329.788	-0.102533
283.78	329.322	-0.102665
302.391	288.776	-0.127171
302.462	288.088	-0.125901
303.06	288.517	-0.126693
302.991	287.745	-0.125244
308.812	304.493	-0.144398
309.228	304.82	-0.144352
308.491	304.882	-0.144686
308.703	305.541	-0.144851
307.949	305.352	-0.145086
307.846	304.769	-0.144885
307.318	305.115	-0.145232
313.312	304.493	-0.141167
313.728	304.82	-0.14091
312.991	304.882	-0.141626
313.203	305.541	-0.141692
312.449	305.351	-0.14231
312.346	304.769	-0.142149
311.819	305.114	-0.142769
317.812	304.493	-0.135703
318.228	304.82	-0.135258
317.491	304.882	-0.136312
317.703	305.541	-0.13628
316.949	305.351	-0.137252
316.846	304.769	-0.137137
316.319	305.114	-0.138011
322.312	304.493	-0.128309
322.694	304.793	-0.127754
321.991	304.882	-0.12904
322.192	305.535	-0.128937
321.447	305.35	-0.130194
321.346	304.769	-0.13012
320.819	305.114	-0.131209
299.825	304.761	-0.1446
299.832	305.336	-0.144805
295.301	304.746	-0.141546
295.332	305.336	-0.141764
290.801	304.746	-0.136273
290.832	305.336	-0.136489
286.301	304.746	-0.129024
286.332	305.336	-0.129245
282.951	304.298	-0.122573
282.376	304.213	-0.121363
308.812	308.993	-0.145142
309.228	309.32	-0.144959
308.491	309.382	-0.145248
308.703	310.041	-0.145117
307.949	309.852	-0.14542
307.846	309.269	-0.145482
307.318	309.615	-0.145656
313.312	308.993	-0.141998
313.728	309.32	-0.141601
312.991	309.382	-0.14228
313.203	310.041	-0.14205
312.449	309.851	-0.142742
312.346	309.269	-0.142844
311.819	309.614	-0.143297
317.812	308.993	-0.136574
318.228	309.32	-0.135989
317.491	309.382	-0.137014
317.703	310.041	-0.136692
316.949	309.851	-0.137742
316.846	309.269	-0.137884
316.319	309.614	-0.138599
322.312	308.993	-0.129183
322.728	309.32	-0.128438
321.991	309.382	-0.12975
322.203	310.041	-0.129345
321.449	309.851	-0.130699
321.346	309.269	-0.13088
320.819	309.614	-0.131818
326.306	309.714	-0.121604
325.792	310.094	-0.12255
325.776	309.36	-0.122588
325.277	309.701	-0.123561
299.82	309.207	-0.144951
299.872	309.748	-0.144936
295.32	309.207	-0.141814
295.363	309.756	-0.141808
290.82	309.207	-0.136483
290.863	309.756	-0.136494
286.32	309.207	-0.129216
286.363	309.756	-0.129242
282.11	309.588	-0.121143
281.759	310.115	-0.120369
281.701	309.377	-0.120351
281.215	309.7	-0.119393
282.93	308.818	-0.122848
282.498	309.27	-0.121946
282.356	308.716	-0.121678
282.11	309.133	-0.121181
326.347	300.835	-0.118542
325.85	301.126	-0.119719
325.8	300.374	-0.119159
325.282	300.697	-0.120457
303.839	300.386	-0.143075
303.507	300.852	-0.143465
303.33	300.249	-0.142943
302.848	300.575	-0.143225
282.198	300.65	-0.119454
281.869	301.152	-0.119133
281.734	300.388	-0.118323
281.224	300.767	-0.117621
308.812	313.493	-0.143837
309.228	313.82	-0.143509
308.491	313.882	-0.143756
308.703	314.541	-0.14331
307.949	314.352	-0.143691
307.846	313.769	-0.144032
307.318	314.115	-0.144026
313.312	313.493	-0.1408
313.728	313.82	-0.140262
312.991	313.882	-0.140896
313.203	314.541	-0.140359
312.449	314.351	-0.141121
312.346	313.769	-0.141497
311.819	314.114	-0.14177
317.812	313.493	-0.135474
318.228	313.82	-0.13475
317.491	313.882	-0.135736
317.703	314.541	-0.135118
316.949	314.351	-0.136239
316.846	313.769	-0.136645
316.319	314.114	-0.13719
322.312	313.493	-0.128128
322.728	313.82	-0.127241
321.991	313.882	-0.128525
322.203	314.541	-0.127827
321.449	314.351	-0.129261
321.346	313.769	-0.129701
320.819	314.114	-0.13048
326.352	314.239	-0.120143
325.809	314.618	-0.120972
325.786	313.871	-0.121357
325.271	314.209	-0.12221
299.82	313.707	-0.143401
299.872	314.248	-0.143141
295.32	313.707	-0.14025
295.363	314.256	-0.140009
290.82	313.707	-0.13495
290.863	314.256	-0.13474
286.32	313.707	-0.127709
286.363	314.256	-0.127524
282.109	314.09	-0.119495
281.754	314.626	-0.118506
281.701	313.878	-0.118789
281.193	314.243	-0.117645
282.93	313.318	-0.121491
282.498	313.771	-0.12042
282.356	313.216	-0.12036
282.11	313.633	-0.119709
303.839	295.886	-0.13837
303.507	296.352	-0.138996
303.33	295.749	-0.13819
302.848	296.075	-0.138645
282.949	295.3	-0.115899
282.376	295.212	-0.114578
308.812	322.493	-0.134716
309.228	322.82	-0.134102
308.491	322.882	-0.134261
308.703	323.541	-0.133207
307.949	323.352	-0.13373
307.846	322.769	-0.134616
307.318	323.115	-0.134257
313.312	322.493	-0.132001
313.728	322.82	-0.131194
312.991	322.882	-0.131709
313.203	323.541	-0.130566
312.449	323.351	-0.131446
312.346	322.769	-0.132365
311.819	323.114	-0.132263
317.812	322.493	-0.127011
318.228	322.82	-0.125995
317.491	322.882	-0.126892
317.703	323.541	-0.125648
316.949	323.351	-0.126914
316.846	322.769	-0.127875
316.319	323.114	-0.12805
322.312	322.493	-0.119783
322.694	322.793	-0.118679
321.991	322.882	-0.119806
322.192	323.535	-0.11849
321.447	323.35	-0.120084
321.346	322.769	-0.121088
320.819	323.114	-0.12152
299.825	322.761	-0.133877
299.832	323.336	-0.133026
295.301	322.746	-0.130916
295.332	323.336	-0.130077
290.801	322.746	-0.125926
290.832	323.336	-0.125113
286.301	322.746	-0.118839
286.332	323.336	-0.118045
281.824	322.719	-0.110305
281.859	323.289	-0.109556
308.812	326.993	-0.127277
309.228	327.319	-0.126548
308.491	327.382	-0.126681
308.703	328.041	-0.125402
307.948	327.855	-0.125975
307.846	327.269	-0.127069
307.318	327.616	-0.126576
313.312	326.993	-0.124612
313.72	327.333	-0.123663
312.991	327.382	-0.124171
313.193	328.058	-0.122762
312.449	327.854	-0.123724
312.346	327.269	-0.124866
311.819	327.613	-0.124629
317.812	326.993	-0.119649
318.228	327.319	-0.118496
317.491	327.382	-0.119373
317.703	328.041	-0.11787
316.949	327.857	-0.1192
316.846	327.269	-0.120403
316.318	327.621	-0.120422
322.312	326.993	-0.112387
322.723	327.332	-0.111024
321.991	327.382	-0.112254
322.194	328.058	-0.110622
321.45	327.854	-0.112336
321.346	327.269	-0.113594
320.819	327.613	-0.113887
326.335	327.836	-0.103063
325.794	328.145	-0.103525
325.785	327.389	-0.104951
325.257	327.723	-0.10538
299.82	327.207	-0.126352
299.872	327.748	-0.12539
295.32	327.207	-0.123419
295.363	327.756	-0.122457
290.82	327.207	-0.118484
290.863	327.756	-0.117542
286.32	327.207	-0.111419
286.363	327.756	-0.110494
282.103	327.567	-0.102681
281.761	328.129	-0.100942
281.692	327.371	-0.102216
281.214	327.765	-0.100561
282.929	326.818	-0.105693
282.493	327.264	-0.104013
282.355	326.715	-0.104696
282.11	327.133	-0.10348
326.307	318.735	-0.116791
325.794	319.09	-0.117406
325.783	318.353	-0.11812
325.259	318.689	-0.118827
303.839	318.386	-0.140643
303.507	318.852	-0.140113
303.33	318.249	-0.140728
302.848	318.575	-0.140335
282.199	318.648	-0.116118
281.872	319.145	-0.114969
281.734	318.388	-0.115434
281.244	318.742	-0.114166
311.119	330.743	-0.119167
310.821	330.241	-0.120296
311.588	330.192	-0.119851
311.292	329.657	-0.121094
320.211	330.697	-0.108965
319.86	330.184	-0.110547
320.605	330.191	-0.109232
320.317	329.677	-0.110754
302.243	330.725	-0.120578
301.861	330.073	-0.121706
302.558	330.212	-0.121569
302.366	329.691	-0.12254
300.768	329.802	-0.121851
301.132	330.22	-0.121207
300.482	330.211	-0.120928
300.827	330.734	-0.120126
297.717	330.757	-0.118535
297.336	330.089	-0.119543
298.057	330.212	-0.119727
297.797	329.706	-0.120559
296.252	329.818	-0.119257
296.606	330.201	-0.118814
295.998	330.212	-0.11827
296.308	330.738	-0.117569
293.212	330.658	-0.114876
293.588	330.187	-0.11612
287.242	329.797	-0.108105
287.608	330.167	-0.108031
286.975	330.199	-0.106826
287.327	330.683	-0.106549
284.212	330.664	-0.100917
284.583	330.193	-0.102504
326.307	291.736	-0.107174
325.794	292.09	-0.10881
325.783	291.353	-0.107489
325.259	291.689	-0.109162
303.839	291.386	-0.131697
303.507	291.852	-0.132522
303.33	291.249	-0.131474
302.848	291.575	-0.132073
282.199	291.648	-0.109056
281.873	292.144	-0.109224
281.734	291.389	-0.107621
281.245	291.742	-0.107264
303.848	286.898	-0.123538
303.507	287.354	-0.124459
303.33	286.753	-0.123283
302.85	287.084	-0.123974
324.657	284.239	-0.0960314
324.931	284.854	-0.0966337
323.649	284.33	-0.0982543
301.975	284.406	-0.119075
301.707	285.091	-0.120259
300.951	285.163	-0.120266
297.706	285.148	-0.119046
296.92	285.083	-0.118469
297.707	284.415	-0.117758
296.625	284.395	-0.117059
288.622	285.14	-0.109214
287.85	285.09	-0.107815
287.565	284.415	-0.106074
280.016	327.96	-0.097895
280.69	328.247	-0.0986319
280.741	329.016	-0.0972268
280.018	300.96	-0.115508
280.667	301.257	-0.116898
280.737	302.022	-0.117446
309.859	332.084	-0.117482
309.548	331.486	-0.118667
310.443	331.33	-0.118522
309.883	331.031	-0.119337
310.884	331.982	-0.117116
327.688	329.058	-0.0981182
327.086	329.373	-0.0986121
326.938	328.488	-0.100653
326.638	329.046	-0.10012
327.592	328.051	-0.100272
327.695	302.086	-0.117034
327.097	302.397	-0.118293
326.941	301.502	-0.117985
326.642	302.062	-0.118911
327.593	301.061	-0.116482
326.862	309.403	-0.120597
280.691	309.402	-0.118454
326.907	300.496	-0.117233
280.692	300.406	-0.116363
326.878	313.877	-0.119358
280.677	313.877	-0.116875
326.907	327.491	-0.102628
280.682	327.414	-0.100191
326.83	318.388	-0.11616
280.726	318.388	-0.113534
311.449	331.297	-0.11795
320.557	331.219	-0.107395
302.547	331.254	-0.119681
300.488	331.268	-0.11902
298.141	331.303	-0.117796
296.012	331.275	-0.116348
293.496	331.208	-0.114163
287.033	331.22	-0.105028
284.495	331.212	-0.100428
326.829	291.388	-0.105551
280.726	291.388	-0.105627
280.024	284.413	-0.090951
327.549	284.396	-0.0905413
296.509	305.615	-0.142879
297.007	305.21	-0.143175
297.029	305.806	-0.143322
297.548	305.618	-0.143648
292.009	305.615	-0.138162
292.507	305.21	-0.138714
292.529	305.806	-0.138857
293.048	305.618	-0.139449
287.509	305.615	-0.1314
288.007	305.21	-0.132171
288.029	305.806	-0.132315
288.548	305.618	-0.133136
283.054	305.578	-0.123099
283.546	305.235	-0.124005
283.53	305.806	-0.124075
284.039	305.639	-0.125037
305.571	306.44	-0.145976
305.253	305.973	-0.14591
296.529	310.146	-0.1428
297.019	309.771	-0.143262
297.033	310.308	-0.143167
297.545	310.14	-0.14357
292.029	310.146	-0.138034
292.519	309.771	-0.138736
292.533	310.308	-0.138644
293.045	310.14	-0.139301
287.529	310.146	-0.131256
288.019	309.771	-0.132164
288.033	310.308	-0.13208
288.545	310.14	-0.132956
283.019	310.129	-0.122852
283.529	309.76	-0.123928
283.515	310.317	-0.123791
284.032	310.145	-0.124833
305.571	310.94	-0.145754
305.253	310.473	-0.145889
296.529	314.646	-0.140821
297.019	314.271	-0.141445
297.033	314.808	-0.141112
297.545	314.64	-0.141589
292.029	314.646	-0.136105
292.519	314.271	-0.136954
292.533	314.808	-0.136641
293.045	314.64	-0.137361
287.529	314.646	-0.129378
288.019	314.271	-0.130428
288.033	314.808	-0.130133
288.545	314.64	-0.131072
283.019	314.633	-0.120994
283.528	314.261	-0.122213
283.515	314.829	-0.121855
284.032	314.646	-0.12297
283.024	296.592	-0.117616
283.535	296.229	-0.118232
283.519	296.799	-0.118839
284.032	296.627	-0.119665
296.509	323.615	-0.130628
297.007	323.21	-0.131624
297.029	323.806	-0.130709
297.548	323.618	-0.131356
292.009	323.615	-0.126215
292.507	323.21	-0.127432
292.529	323.806	-0.126538
293.048	323.618	-0.127417
287.509	323.615	-0.119686
288.007	323.21	-0.121132
288.029	323.806	-0.120256
288.548	323.618	-0.121379
283.021	323.613	-0.111369
283.532	323.23	-0.112964
283.539	323.81	-0.11209
284.048	323.633	-0.113356
305.571	324.44	-0.132412
305.253	323.973	-0.133182
315.134	327.678	-0.12168
315.193	328.245	-0.120561
314.668	328.023	-0.121522
314.789	328.453	-0.120598
324.116	327.707	-0.107677
324.147	328.277	-0.106542
323.664	328.032	-0.107946
323.769	328.467	-0.10692
296.554	328.171	-0.122659
297.032	327.769	-0.123765
297.071	328.329	-0.122741
297.563	328.1	-0.123498
292.06	328.172	-0.118306
292.537	327.77	-0.119629
292.575	328.323	-0.118634
293.068	328.1	-0.119605
287.557	328.17	-0.111807
288.035	327.769	-0.11336
288.077	328.326	-0.112377
288.569	328.1	-0.113591
283.048	328.144	-0.103491
283.549	327.752	-0.105228
283.572	328.309	-0.10422
284.068	328.095	-0.105596
305.571	315.44	-0.143452
305.253	314.973	-0.143809
305.571	328.919	-0.124366
305.252	328.468	-0.125224
306.239	287.651	-0.124646
306.743	288.049	-0.12524
306.243	288.196	-0.125684
305.797	288.039	-0.125503
296.479	300.894	-0.140872
296.932	301.302	-0.141483
296.316	301.558	-0.14117
296.752	301.982	-0.141746
291.979	300.894	-0.136303
292.432	301.302	-0.137122
291.816	301.558	-0.136488
292.252	301.982	-0.137265
287.479	300.894	-0.129603
287.932	301.302	-0.130617
287.316	301.558	-0.129703
287.751	301.981	-0.130662
296.479	296.394	-0.136725
296.932	296.803	-0.137516
296.316	297.058	-0.137363
296.752	297.483	-0.138131
291.979	296.394	-0.132396
292.432	296.802	-0.133398
291.816	297.058	-0.132918
292.252	297.482	-0.133885
287.479	296.394	-0.125788
287.932	296.802	-0.127006
287.316	297.058	-0.12622
287.752	297.482	-0.127389
296.516	318.827	-0.137094
296.935	319.3	-0.13688
296.316	319.558	-0.136092
296.752	319.982	-0.135915
292.016	318.827	-0.132537
292.435	319.299	-0.132539
291.816	319.558	-0.131474
292.252	319.982	-0.131516
287.516	318.827	-0.125913
287.929	319.314	-0.126093
287.316	319.558	-0.124781
287.751	319.98	-0.125032
296.479	291.894	-0.130462
296.932	292.303	-0.131422
296.316	292.558	-0.131407
296.752	292.983	-0.132353
291.979	291.894	-0.126257
292.432	292.302	-0.127448
291.816	292.558	-0.127109
292.252	292.982	-0.128274
287.479	291.894	-0.119671
287.932	292.302	-0.121099
287.316	292.558	-0.120441
287.751	292.981	-0.121829
301.038	287.521	-0.124679
301.426	287.968	-0.125594
300.818	288.083	-0.125691
301.24	288.54	-0.126624
296.509	287.365	-0.122443
296.938	287.828	-0.123604
296.315	288.057	-0.123614
296.753	288.484	-0.124708
291.979	287.457	-0.118378
292.44	287.831	-0.119642
291.836	288.052	-0.119334
292.256	288.494	-0.120668
287.508	287.366	-0.111579
287.939	287.818	-0.113201
287.315	288.058	-0.112575
287.752	288.483	-0.114145
301.027	301.652	-0.14371
301.519	301.608	-0.143816
301.948	301.838	-0.144039
301.896	302.553	-0.14442
301.116	305.508	-0.145364
301.365	305.964	-0.14554
300.696	306.102	-0.145335
301.33	306.514	-0.145607
323.799	297.666	-0.120511
324.457	297.75	-0.119321
324.616	297.258	-0.118483
301.027	297.152	-0.13973
301.519	297.109	-0.139793
301.948	297.338	-0.140113
301.895	298.056	-0.14086
283.681	300.493	-0.122323
283.515	300.865	-0.122237
283.2	300.451	-0.121332
283.012	301.111	-0.121382
301.153	309.994	-0.145444
301.38	310.453	-0.145422
300.71	310.587	-0.145139
301.331	311.013	-0.145243
301.027	292.652	-0.133662
301.519	292.609	-0.133691
301.948	292.838	-0.134099
301.895	293.556	-0.135162
301.028	319.654	-0.138648
301.519	319.609	-0.138869
301.948	319.838	-0.138696
301.896	320.553	-0.137751
301.116	323.508	-0.133288
301.365	323.964	-0.132643
300.696	324.102	-0.132171
301.33	324.514	-0.131716
301.153	314.494	-0.143543
301.38	314.953	-0.143307
300.71	315.087	-0.142958
301.331	315.513	-0.142863
283.681	318.493	-0.119218
283.515	318.865	-0.118518
283.2	318.451	-0.118304
283.012	319.113	-0.117259
301.161	327.977	-0.125495
301.384	328.447	-0.124684
300.714	328.583	-0.124172
301.336	329.003	-0.123599
323.839	288.674	-0.106465
324.124	288.245	-0.105073
324.514	288.617	-0.105005
324.484	287.986	-0.103838
283.681	291.493	-0.111859
283.515	291.865	-0.112143
283.2	291.452	-0.1108
283.012	292.111	-0.111511
325.527	305.247	-0.122539
325.355	306.003	-0.12312
324.839	305.531	-0.123977
300.455	305.484	-0.145116
295.955	305.484	-0.142377
295.779	301.626	-0.140758
291.455	305.484	-0.137394
291.279	301.626	-0.135809
286.955	305.484	-0.130401
286.775	301.626	-0.128781
283.024	304.918	-0.122898
300.513	309.908	-0.145208
295.973	309.961	-0.14235
291.473	309.961	-0.137319
286.973	309.961	-0.13031
282.99	309.487	-0.122901
282.46	309.935	-0.121779
305.538	300.418	-0.143039
305.681	301.042	-0.143526
305.032	300.894	-0.143477
305.266	301.469	-0.14389
300.487	300.573	-0.142762
301.095	300.533	-0.142929
300.769	301.121	-0.143278
301.33	301.124	-0.143442
300.292	301.124	-0.143112
295.779	297.126	-0.137015
291.279	297.126	-0.132294
286.779	297.126	-0.125339
282.443	301.017	-0.120189
282.465	301.593	-0.120565
281.928	302.02	-0.119713
300.513	314.408	-0.143342
295.973	314.461	-0.140456
291.473	314.461	-0.135473
286.973	314.461	-0.128508
282.989	313.987	-0.121292
282.459	314.437	-0.119998
282.479	310.582	-0.121667
281.898	310.971	-0.120402
305.538	295.918	-0.138299
305.681	296.542	-0.139079
305.032	296.394	-0.138978
305.266	296.969	-0.139662
300.487	296.073	-0.138271
301.095	296.033	-0.138394
300.769	296.621	-0.139043
301.33	296.624	-0.139185
300.292	296.624	-0.138898
295.779	292.626	-0.131111
291.279	292.626	-0.126531
286.774	292.626	-0.119583
283.015	295.924	-0.116819
325.527	323.195	-0.112657
325.387	323.983	-0.11172
324.87	323.505	-0.113481
300.455	323.484	-0.133071
295.955	323.484	-0.130387
295.78	319.628	-0.135554
291.455	323.484	-0.125716
291.28	319.628	-0.130691
286.955	323.484	-0.118929
286.776	319.626	-0.123757
282.437	323.481	-0.110408
300.515	327.903	-0.125384
295.973	327.962	-0.122593
291.473	327.962	-0.117963
286.973	327.962	-0.111191
282.991	327.484	-0.10461
282.458	327.938	-0.102699
305.538	318.418	-0.140682
305.681	319.042	-0.139994
305.032	318.894	-0.140173
305.266	319.469	-0.13951
300.514	318.6	-0.139657
301.113	318.573	-0.139921
300.771	319.127	-0.139181
301.333	319.137	-0.13937
300.296	319.117	-0.138995
282.443	319.016	-0.116235
282.465	319.596	-0.115639
281.913	320.024	-0.11404
282.478	315.089	-0.11963
281.902	315.522	-0.118189
282.483	328.594	-0.101488
281.918	329.033	-0.0994872
305.538	291.418	-0.131602
305.681	292.042	-0.132634
305.032	291.894	-0.132485
305.266	292.469	-0.133405
324.907	288.16	-0.103326
325.161	288.628	-0.103721
300.484	291.574	-0.13176
301.094	291.534	-0.131851
300.767	292.121	-0.132753
301.329	292.124	-0.132881
300.292	292.124	-0.132625
300.279	288.153	-0.125683
295.782	288.132	-0.123361
291.277	288.141	-0.118789
286.776	288.127	-0.111738
282.444	292.015	-0.110185
282.466	292.594	-0.111156
281.921	293.006	-0.110673
305.529	286.854	-0.123286
305.668	287.487	-0.124478
305.031	287.367	-0.124354
305.244	287.94	-0.125424
306.165	287.074	-0.123559
306.777	287.387	-0.123959
306.72	286.703	-0.12266
301.632	287.448	-0.124641
301.816	287.001	-0.123809
302.279	287.398	-0.124587
302.231	286.739	-0.123328
298.727	305.207	-0.144229
298.7	305.858	-0.144372
298.137	305.404	-0.143963
298.075	306.096	-0.14406
294.227	305.206	-0.140642
294.199	305.858	-0.140751
293.637	305.404	-0.140069
293.575	306.096	-0.140116
289.727	305.206	-0.134864
289.699	305.858	-0.134946
289.137	305.404	-0.134022
289.075	306.096	-0.13403
285.226	305.207	-0.127194
285.195	305.861	-0.127253
284.636	305.409	-0.126135
284.56	306.105	-0.126091
302.72	305.842	-0.145779
303.166	306.206	-0.145895
302.614	306.638	-0.145886
303.288	306.712	-0.145961
298.729	309.703	-0.144359
298.702	310.356	-0.144226
298.14	309.907	-0.143995
298.076	310.596	-0.1438
294.23	309.697	-0.140687
294.202	310.352	-0.140532
293.641	309.905	-0.140025
293.576	310.596	-0.139793
289.73	309.697	-0.134863
289.702	310.352	-0.134694
289.141	309.905	-0.133941
289.076	310.596	-0.133681
285.228	309.698	-0.127176
285.198	310.355	-0.126989
284.635	309.909	-0.126033
284.559	310.605	-0.125727
308.487	301.305	-0.142825
309.18	300.959	-0.142237
308.648	300.686	-0.142252
312.987	301.305	-0.13972
313.68	300.959	-0.138787
313.148	300.686	-0.139068
317.487	301.305	-0.134416
318.18	300.959	-0.133171
317.648	300.686	-0.133701
321.987	301.305	-0.127142
322.679	300.958	-0.125631
322.147	300.685	-0.126368
302.721	310.342	-0.145745
303.166	310.706	-0.145713
302.614	311.137	-0.145499
303.288	311.212	-0.145557
298.729	314.203	-0.142578
298.702	314.856	-0.142147
298.14	314.407	-0.142119
298.076	315.096	-0.141612
294.23	314.197	-0.138922
294.202	314.852	-0.138487
293.641	314.405	-0.138176
293.576	315.096	-0.137652
289.73	314.197	-0.133144
289.702	314.852	-0.132713
289.141	314.405	-0.132144
289.076	315.096	-0.131609
285.228	314.198	-0.125484
285.198	314.855	-0.125042
284.635	314.409	-0.124261
284.56	315.106	-0.123684
308.487	296.805	-0.138447
309.18	296.459	-0.137686
308.648	296.186	-0.137576
312.987	296.805	-0.135364
313.68	296.459	-0.134288
313.148	296.186	-0.134426
317.487	296.805	-0.130155
318.18	296.459	-0.128757
317.648	296.186	-0.129156
321.987	296.805	-0.122886
322.684	296.475	-0.121218
322.148	296.187	-0.121822
298.727	323.207	-0.132675
298.7	323.858	-0.131637
298.137	323.404	-0.132049
298.075	324.096	-0.130903
294.227	323.206	-0.129255
294.199	323.858	-0.128212
293.637	323.404	-0.12837
293.575	324.096	-0.127207
289.727	323.206	-0.123773
289.699	323.858	-0.122726
289.137	323.404	-0.12261
289.075	324.096	-0.121428
285.228	323.206	-0.116234
285.2	323.858	-0.115178
284.64	323.407	-0.114833
284.576	324.096	-0.11363
302.72	323.842	-0.133158
303.166	324.206	-0.132628
302.614	324.638	-0.131812
303.288	324.712	-0.131777
298.729	327.7	-0.124917
298.701	328.346	-0.123682
298.143	327.89	-0.124241
298.078	328.556	-0.122938
294.231	327.694	-0.121541
294.202	328.342	-0.12029
293.656	327.885	-0.120621
293.583	328.557	-0.11927
289.73	327.697	-0.116084
289.702	328.345	-0.114816
289.155	327.884	-0.114894
289.085	328.558	-0.113502
285.231	327.694	-0.108555
285.202	328.342	-0.107268
284.647	327.89	-0.107093
284.583	328.558	-0.105691
308.487	319.305	-0.139057
309.18	318.959	-0.139195
308.648	318.686	-0.13969
312.987	319.305	-0.136395
313.68	318.959	-0.136177
313.148	318.686	-0.136924
317.487	319.305	-0.131469
318.18	318.959	-0.130888
317.648	318.686	-0.13189
321.987	319.305	-0.124353
322.679	318.958	-0.123473
322.147	318.685	-0.124698
302.721	314.842	-0.143697
303.166	315.206	-0.143495
302.614	315.637	-0.143069
303.288	315.712	-0.143095
302.722	328.331	-0.125222
303.161	328.69	-0.124604
302.621	329.075	-0.123771
303.276	329.201	-0.123617
308.487	292.305	-0.132071
309.18	291.959	-0.131161
308.648	291.686	-0.130942
312.987	292.305	-0.128997
313.68	291.959	-0.127778
313.148	291.686	-0.127795
317.487	292.305	-0.123826
318.18	291.959	-0.122269
317.648	291.686	-0.122545
321.987	292.305	-0.116519
322.678	291.958	-0.114662
322.147	291.685	-0.115161
308.459	287.791	-0.12403
309.182	287.448	-0.123008
308.653	287.183	-0.122743
312.959	287.791	-0.120916
313.687	287.454	-0.119573
313.145	287.178	-0.119529
317.459	287.791	-0.115696
318.183	287.454	-0.113994
317.643	287.178	-0.114207
321.959	287.791	-0.108299
322.673	287.433	-0.106249
322.163	287.187	-0.106693
280.57	305.333	-0.118249
281.229	305.373	-0.119488
280.91	306.06	-0.118991
281.564	305.959	-0.120223
280.598	296.367	-0.112557
281.235	296.374	-0.113785
280.931	297.066	-0.113971
281.548	296.935	-0.11503
280.598	287.366	-0.0978932
281.259	287.369	-0.0992282
280.939	288.068	-0.0999808
281.573	287.948	-0.101037
283.05	331.353	-0.0973163
282.997	330.727	-0.0983778
283.677	331.059	-0.0991251
283.516	330.512	-0.0998413
292.07	331.326	-0.112346
292	330.717	-0.11337
292.681	331.048	-0.113582
292.517	330.501	-0.114404
306.017	330.352	-0.121614
306.627	330.702	-0.120888
305.923	331.038	-0.120362
306.612	331.375	-0.119685
315.083	330.455	-0.116453
315.621	330.697	-0.115395
314.906	331.03	-0.115577
315.578	331.347	-0.114265
324.083	330.454	-0.102403
324.619	330.697	-0.100857
323.905	331.03	-0.101652
324.578	331.347	-0.0997133
326.016	305.932	-0.121842
326.288	305.353	-0.121148
326.645	306.06	-0.120708
326.985	305.333	-0.119873
326.013	296.905	-0.115355
326.307	296.324	-0.114067
326.641	297.04	-0.114333
326.957	296.367	-0.112919
325.978	287.942	-0.100723
326.289	287.346	-0.0988798
326.614	288.063	-0.0997113
326.957	287.366	-0.0976204
307.799	301.785	-0.143443
308.037	302.405	-0.143702
312.299	301.785	-0.140679
312.537	302.405	-0.140827
316.799	301.785	-0.13569
317.037	302.405	-0.135723
321.299	301.785	-0.128692
321.537	302.405	-0.128628
307.799	297.285	-0.13931
308.037	297.905	-0.139874
312.299	297.285	-0.136537
312.537	297.905	-0.136988
316.799	297.285	-0.131643
317.037	297.905	-0.131964
321.299	297.285	-0.124664
321.537	297.905	-0.124883
307.799	292.785	-0.133146
308.037	293.405	-0.133978
312.299	292.785	-0.130373
312.537	293.405	-0.131104
316.799	292.785	-0.125533
317.037	293.405	-0.126147
321.299	292.785	-0.118536
321.537	293.405	-0.119051
307.799	319.785	-0.138688
308.037	320.405	-0.137785
312.299	319.785	-0.136376
312.537	320.405	-0.13538
316.799	319.785	-0.131819
317.037	320.405	-0.130729
321.299	319.785	-0.125023
321.537	320.405	-0.123837
307.819	288.288	-0.125265
308.037	288.905	-0.12631
312.336	288.288	-0.122423
312.549	288.911	-0.123397
316.836	288.289	-0.117518
317.049	288.911	-0.118398
321.338	288.289	-0.110414
321.549	288.911	-0.111216
304.757	303.136	-0.144835
305.109	303.721	-0.145093
304.735	304.209	-0.145306
307.252	304.546	-0.145016
307.214	304.034	-0.144803
306.932	303.563	-0.144688
307.305	303.154	-0.144365
307.482	302.566	-0.144008
308.845	302.676	-0.143518
309.303	302.789	-0.143372
309.341	303.294	-0.143604
309.621	303.741	-0.143683
309.222	304.203	-0.144083
311.752	304.546	-0.142572
311.714	304.034	-0.142366
311.432	303.563	-0.14238
311.805	303.154	-0.141863
311.982	302.566	-0.141409
313.345	302.676	-0.140246
313.803	302.789	-0.139869
313.841	303.294	-0.140089
314.121	303.741	-0.140029
313.722	304.203	-0.140639
316.252	304.546	-0.137842
316.214	304.034	-0.137652
315.932	303.563	-0.137801
316.305	303.154	-0.137102
316.482	302.566	-0.136565
317.845	302.676	-0.134768
318.303	302.789	-0.134185
318.341	303.294	-0.134388
318.621	303.741	-0.1342
318.222	304.203	-0.134993
320.752	304.546	-0.131067
320.714	304.034	-0.130893
320.432	303.563	-0.13116
320.805	303.154	-0.130306
320.982	302.566	-0.129696
322.345	302.676	-0.12736
322.803	302.789	-0.126605
322.84	303.293	-0.126798
323.116	303.737	-0.126515
322.712	304.195	-0.127461
325.963	304.76	-0.1215
325.294	304.54	-0.122675
325.218	304.034	-0.12258
324.932	303.563	-0.122913
325.274	303.172	-0.122054
325.389	302.641	-0.121567
325.881	302.582	-0.120603
326.246	302.277	-0.119762
326.614	302.558	-0.119252
304.256	304.633	-0.14547
303.641	304.989	-0.145585
303.268	304.638	-0.145436
302.753	304.485	-0.145345
302.721	304	-0.145148
303.34	302.595	-0.144559
303.778	302.218	-0.144379
304.301	302.685	-0.144623
302.472	303.527	-0.144933
302.793	303.186	-0.144811
302.837	302.685	-0.144585
299.287	305.001	-0.144435
298.747	304.647	-0.144049
300.329	304.045	-0.144565
300.281	303.274	-0.144241
300.605	303.658	-0.14453
299.697	302.664	-0.143725
300.211	302.789	-0.144003
298.852	302.628	-0.143319
299.262	302.326	-0.143374
298.3	304.146	-0.143643
297.975	303.563	-0.143253
298.286	303.197	-0.143278
298.339	302.686	-0.143092
294.787	305.001	-0.141136
294.247	304.647	-0.140492
295.826	304.055	-0.141809
295.863	303.292	-0.141566
296.127	303.68	-0.14195
294.353	302.623	-0.139883
294.765	302.303	-0.140147
293.8	304.146	-0.139877
293.475	303.563	-0.13934
293.786	303.197	-0.139535
293.839	302.686	-0.139393
290.287	305.001	-0.135618
289.747	304.647	-0.134737
291.326	304.055	-0.136799
291.363	303.292	-0.136595
291.627	303.68	-0.137096
289.853	302.623	-0.134226
290.265	302.303	-0.134691
289.3	304.146	-0.133935
288.975	303.563	-0.133264
289.286	303.197	-0.133609
289.339	302.686	-0.133501
285.787	305.001	-0.128166
285.247	304.647	-0.127084
286.826	304.055	-0.129769
286.863	303.292	-0.129588
287.127	303.68	-0.130194
285.347	302.618	-0.126608
285.78	302.298	-0.127271
284.8	304.146	-0.126121
284.476	303.576	-0.125339
284.785	303.203	-0.125793
284.839	302.686	-0.125701
281.553	304.786	-0.119943
281.708	302.6	-0.119522
282.227	302.646	-0.120552
280.871	302.587	-0.117942
281.298	302.279	-0.118612
304.757	307.636	-0.146061
305.109	308.221	-0.146071
304.735	308.709	-0.146056
307.252	309.046	-0.145696
307.214	308.534	-0.14571
306.932	308.063	-0.145797
307.294	307.674	-0.145673
307.513	307.172	-0.145581
307.966	307.155	-0.14542
308.42	306.871	-0.145228
308.781	307.177	-0.145105
309.303	307.289	-0.144892
309.341	307.794	-0.144897
309.621	308.241	-0.144783
309.222	308.703	-0.144967
311.752	309.046	-0.143356
311.714	308.534	-0.143377
311.432	308.063	-0.143596
311.794	307.674	-0.143279
312.013	307.172	-0.143065
312.466	307.155	-0.142674
312.92	306.871	-0.142243
313.281	307.177	-0.141942
313.803	307.289	-0.141457
313.841	307.794	-0.141454
314.121	308.241	-0.141202
313.722	308.703	-0.141604
316.252	309.046	-0.13868
316.214	308.534	-0.138711
315.932	308.063	-0.139063
316.294	307.674	-0.138561
316.513	307.172	-0.138234
316.966	307.155	-0.137624
317.42	306.871	-0.136976
317.781	307.177	-0.13651
318.303	307.289	-0.135787
318.341	307.794	-0.135775
318.621	308.241	-0.135397
318.222	308.703	-0.135991
320.752	309.046	-0.131922
320.714	308.534	-0.131966
320.432	308.063	-0.132434
320.794	307.674	-0.131776
321.013	307.172	-0.131355
321.466	307.155	-0.130561
321.92	306.871	-0.129731
322.281	307.177	-0.129127
322.803	307.289	-0.128206
322.841	307.794	-0.128182
323.121	308.241	-0.127701
322.722	308.703	-0.128445
325.217	309.055	-0.12366
325.214	308.534	-0.123644
324.932	308.063	-0.124172
325.294	307.669	-0.123442
325.442	307.148	-0.123124
325.866	307.071	-0.122308
326.217	306.656	-0.121607
326.805	306.893	-0.120563
304.256	309.133	-0.14602
303.641	309.489	-0.145958
303.268	309.138	-0.145951
302.753	308.985	-0.145909
302.724	308.501	-0.145922
303.414	307.17	-0.145989
303.821	306.896	-0.146002
304.305	307.227	-0.146038
302.485	308.032	-0.145903
302.814	307.683	-0.145943
302.948	307.198	-0.145951
299.288	309.483	-0.144669
298.747	309.147	-0.144416
300.309	307.666	-0.145245
299.709	307.138	-0.144969
300.21	307.201	-0.145206
298.866	307.131	-0.144553
299.288	306.844	-0.144762
298.3	308.646	-0.144206
297.978	308.071	-0.144052
298.299	307.699	-0.144248
298.373	307.179	-0.144296
294.789	309.467	-0.141275
294.247	309.147	-0.140759
295.81	307.662	-0.14237
295.205	307.144	-0.141813
295.697	307.196	-0.142283
294.366	307.131	-0.140989
294.788	306.844	-0.141412
293.8	308.646	-0.140336
293.478	308.071	-0.140029
293.799	307.699	-0.140391
293.873	307.179	-0.140483
290.289	309.467	-0.135703
289.747	309.147	-0.134947
291.31	307.662	-0.137279
290.705	307.144	-0.136448
291.197	307.196	-0.137145
289.866	307.131	-0.135246
290.288	306.844	-0.135861
289.3	308.646	-0.134333
288.978	308.071	-0.133888
289.299	307.699	-0.134394
289.373	307.179	-0.134523
285.789	309.468	-0.12823
285.247	309.147	-0.127275
286.81	307.662	-0.13021
286.205	307.144	-0.129144
286.697	307.196	-0.130034
285.366	307.131	-0.127625
285.788	306.844	-0.128397
284.8	308.646	-0.126502
284.48	308.074	-0.125949
284.798	307.7	-0.126565
284.873	307.179	-0.12672
281.747	307.084	-0.120592
282.266	307.14	-0.121605
280.751	306.893	-0.118721
281.354	306.672	-0.119851
304.757	298.636	-0.141462
305.114	299.22	-0.141991
304.752	299.708	-0.142456
308.787	300.124	-0.141682
308.161	300.467	-0.14226
307.782	300.17	-0.142147
307.252	300.046	-0.142245
307.214	299.534	-0.141787
306.932	299.063	-0.141452
307.305	298.654	-0.14092
307.482	298.066	-0.140269
308.845	298.176	-0.139806
309.303	298.289	-0.139709
309.345	298.786	-0.140175
309.619	299.25	-0.140481
309.234	299.702	-0.141093
313.287	300.124	-0.138434
312.661	300.467	-0.139312
312.282	300.17	-0.139379
311.752	300.046	-0.139727
311.714	299.534	-0.139283
311.432	299.063	-0.139076
311.805	298.654	-0.13837
311.982	298.066	-0.137637
313.345	298.176	-0.136544
313.803	298.289	-0.136227
313.845	298.786	-0.136667
314.119	299.25	-0.136836
313.734	299.702	-0.13763
317.787	300.124	-0.133015
317.161	300.467	-0.134175
316.782	300.17	-0.134424
316.252	300.046	-0.135023
316.214	299.534	-0.134607
315.932	299.063	-0.134544
316.305	298.654	-0.133669
316.482	298.066	-0.132871
317.845	298.176	-0.131138
318.303	298.289	-0.130606
318.345	298.786	-0.131019
318.619	299.25	-0.131052
318.234	299.702	-0.132017
322.287	300.124	-0.125632
321.661	300.467	-0.127039
321.282	300.17	-0.127445
320.752	300.046	-0.128265
320.714	299.534	-0.127869
320.432	299.063	-0.12793
320.805	298.654	-0.126896
320.982	298.066	-0.126025
322.345	298.176	-0.123731
322.803	298.289	-0.123021
322.845	298.786	-0.123422
323.12	299.247	-0.123347
322.733	299.701	-0.124464
325.239	300.04	-0.119947
325.214	299.534	-0.119529
324.932	299.063	-0.119648
325.274	298.672	-0.118608
325.388	298.14	-0.117879
325.868	298.073	-0.116893
326.22	297.65	-0.115798
326.808	297.889	-0.114963
304.309	300.147	-0.142857
302.752	300.046	-0.142762
302.723	299.5	-0.142276
303.34	298.095	-0.140968
[truncated: 4,673 more rows]

## Sheet: Figure-14-c-d
300.289	308.936	-0.105883
300.838	308.878	-0.105875
300.407	309.377	-0.105919
301.011	309.448	-0.105918
295.789	308.936	-0.106497
296.324	308.918	-0.106424
295.907	309.376	-0.106516
296.449	309.53	-0.106452
291.289	308.936	-0.107419
291.824	308.918	-0.107333
291.407	309.376	-0.107434
291.949	309.53	-0.107355
286.789	308.936	-0.107948
287.324	308.918	-0.10796
286.907	309.376	-0.107984
287.449	309.53	-0.107999
300.289	313.436	-0.106417
300.838	313.378	-0.106397
300.407	313.877	-0.106528
301.011	313.948	-0.106535
295.789	313.436	-0.10712
296.324	313.418	-0.107031
295.907	313.876	-0.107236
296.449	314.03	-0.107189
291.289	313.436	-0.108128
291.824	313.418	-0.108034
291.407	313.876	-0.108261
291.949	314.03	-0.108215
286.789	313.436	-0.108659
287.324	313.418	-0.108673
286.907	313.876	-0.108818
287.449	314.03	-0.108882
282.289	322.438	-0.110473
282.824	322.418	-0.110669
282.408	322.876	-0.110586
282.947	323.035	-0.110802
300.289	326.936	-0.109089
300.838	326.878	-0.109055
300.407	327.377	-0.109062
301.013	327.444	-0.109019
295.789	326.936	-0.11011
296.324	326.918	-0.109977
295.907	327.376	-0.110049
296.455	327.533	-0.109894
291.289	326.936	-0.11127
291.824	326.918	-0.111184
291.407	327.376	-0.111208
291.961	327.538	-0.11109
286.789	326.936	-0.111504
287.324	326.918	-0.111573
286.907	327.376	-0.111458
287.456	327.533	-0.111492
282.774	302.723	-0.108597
283.21	303.128	-0.108568
282.503	303.191	-0.108325
282.758	303.709	-0.108244
300.728	307.947	-0.105853
301.296	308.242	-0.105848
300.503	308.473	-0.105848
296.228	307.947	-0.106427
296.768	308.337	-0.106341
296.003	308.473	-0.106442
291.728	307.947	-0.107349
292.268	308.337	-0.107237
291.503	308.473	-0.107366
287.228	307.947	-0.107966
287.768	308.337	-0.10794
287.003	308.473	-0.107939
282.803	307.214	-0.107536
283.231	307.609	-0.107596
282.503	307.691	-0.10737
282.761	308.212	-0.107415
300.728	312.447	-0.106211
301.296	312.742	-0.106261
300.503	312.973	-0.106298
296.228	312.447	-0.106814
296.768	312.837	-0.106809
296.003	312.973	-0.106954
291.728	312.447	-0.107786
292.268	312.837	-0.107777
291.503	312.973	-0.107948
287.228	312.447	-0.1084
287.768	312.837	-0.108492
287.003	312.973	-0.108521
282.789	311.707	-0.107704
283.229	312.108	-0.107887
282.503	312.191	-0.107679
282.761	312.712	-0.107873
282.774	293.722	-0.111496
283.21	294.128	-0.11158
282.503	294.191	-0.111286
282.758	294.709	-0.111292
282.728	321.447	-0.11046
283.262	321.842	-0.110721
282.503	321.973	-0.110463
300.728	325.947	-0.109073
301.296	326.242	-0.109044
300.503	326.473	-0.109074
296.228	325.947	-0.110038
296.768	326.337	-0.109883
296.003	326.473	-0.110073
291.728	325.947	-0.111268
292.268	326.337	-0.111136
291.503	326.473	-0.111268
287.228	325.947	-0.111669
287.768	326.337	-0.111671
287.003	326.473	-0.111583
282.808	325.223	-0.11075
283.232	325.61	-0.110858
282.503	325.691	-0.110548
282.761	326.212	-0.110578
288.744	330.689	-0.110663
288.343	330.051	-0.110871
289.031	330.172	-0.110792
288.795	329.688	-0.110974
295.341	301.966	-0.107839
296.004	302.161	-0.107622
295.372	302.535	-0.107593
295.911	302.815	-0.1074
290.841	301.966	-0.10897
291.504	302.161	-0.108761
290.872	302.535	-0.108699
291.411	302.815	-0.108503
286.329	301.965	-0.109448
287	302.153	-0.109397
286.372	302.535	-0.109185
286.911	302.815	-0.109109
295.341	297.466	-0.109482
296.004	297.661	-0.109207
295.372	298.035	-0.109217
295.906	298.32	-0.108967
290.841	297.466	-0.110854
291.504	297.661	-0.110625
290.872	298.035	-0.110568
291.406	298.32	-0.110341
286.341	297.466	-0.111284
287.004	297.661	-0.111251
286.372	298.035	-0.111026
286.906	298.32	-0.110953
282.728	298.947	-0.109968
283.293	299.349	-0.110008
282.505	299.522	-0.109673
282.919	299.983	-0.109665
295.341	292.966	-0.110819
296.004	293.161	-0.110553
295.372	293.535	-0.110646
295.906	293.82	-0.110407
290.841	292.966	-0.112227
291.504	293.161	-0.112048
290.872	293.535	-0.112074
291.406	293.82	-0.111903
286.329	292.965	-0.112481
286.999	293.154	-0.11253
286.372	293.535	-0.112363
286.906	293.82	-0.112375
295.341	319.966	-0.109307
296.004	320.161	-0.109181
295.372	320.535	-0.109434
295.911	320.815	-0.109366
290.841	319.966	-0.110565
291.504	320.161	-0.110487
290.872	320.535	-0.110706
291.411	320.815	-0.11068
286.33	319.965	-0.110911
287	320.153	-0.111016
286.372	320.535	-0.111041
286.911	320.815	-0.111162
300.7	316.942	-0.107235
301.296	317.242	-0.107297
300.49	317.526	-0.107391
300.85	317.974	-0.107527
296.228	316.947	-0.108068
296.779	317.323	-0.108061
295.997	317.515	-0.10829
296.373	317.95	-0.10837
291.728	316.947	-0.109251
292.279	317.323	-0.109268
291.497	317.515	-0.109498
291.873	317.95	-0.109606
287.228	316.947	-0.109893
287.779	317.323	-0.110032
286.997	317.515	-0.110083
287.373	317.95	-0.110277
282.728	316.947	-0.109173
283.293	317.349	-0.109497
282.505	317.522	-0.109282
282.919	317.983	-0.109605
299.819	288.482	-0.109528
300.502	288.675	-0.109393
299.844	289.059	-0.109536
300.405	289.323	-0.109431
295.341	288.466	-0.110961
296.003	288.661	-0.11077
295.372	289.035	-0.110987
295.906	289.32	-0.110842
290.819	288.48	-0.112211
291.506	288.667	-0.112121
290.845	289.057	-0.112261
291.406	289.321	-0.112199
286.33	288.465	-0.112229
286.999	288.654	-0.112383
286.372	289.035	-0.112327
286.906	289.32	-0.112466
282.728	289.947	-0.111383
283.287	290.354	-0.111695
282.505	290.522	-0.111371
282.919	290.983	-0.111631
308.395	301.883	-0.10715
309.03	301.691	-0.107354
308.625	302.227	-0.107105
309.232	302.305	-0.107263
312.895	301.883	-0.108423
313.53	301.691	-0.108682
313.125	302.227	-0.108381
313.732	302.305	-0.108573
317.395	301.883	-0.109754
318.03	301.691	-0.109965
317.625	302.227	-0.10969
318.232	302.305	-0.109828
321.895	301.883	-0.1103
322.53	301.691	-0.110325
322.125	302.227	-0.11018
322.73	302.306	-0.110142
300.849	304.184	-0.106235
300.882	304.877	-0.106144
300.352	304.52	-0.106211
300.275	304.99	-0.106173
296.328	304.215	-0.106955
296.349	304.913	-0.106822
295.828	304.522	-0.106977
295.753	305	-0.106917
296.539	302.593	-0.107362
296.36	303.185	-0.10721
291.828	304.215	-0.107986
291.849	304.913	-0.107818
291.328	304.522	-0.107998
291.253	305	-0.107916
292.039	302.593	-0.108477
291.86	303.185	-0.108293
287.328	304.215	-0.108659
287.349	304.913	-0.108485
286.828	304.522	-0.10857
286.753	305	-0.108467
287.539	302.593	-0.109213
287.36	303.185	-0.108986
282.588	304.683	-0.10796
282.471	305.296	-0.107793
282.104	304.75	-0.107788
281.834	305.335	-0.107597
283.414	303.851	-0.108389
300.734	307.396	-0.105893
301.318	307.669	-0.105865
296.256	307.337	-0.106481
296.806	307.588	-0.106372
291.756	307.337	-0.107407
292.306	307.588	-0.107274
287.256	307.337	-0.108032
287.806	307.588	-0.107987
283.415	308.353	-0.107592
308.395	297.383	-0.108234
309.03	297.191	-0.108466
308.625	297.727	-0.10817
309.232	297.805	-0.10834
312.895	297.383	-0.109683
313.53	297.191	-0.109978
313.125	297.727	-0.109634
313.732	297.805	-0.109848
317.395	297.383	-0.111121
318.03	297.191	-0.111332
317.625	297.727	-0.111042
318.232	297.805	-0.111171
321.895	297.383	-0.111557
322.53	297.191	-0.111557
322.125	297.727	-0.111426
322.721	297.811	-0.111362
296.539	298.093	-0.108884
296.353	298.698	-0.108712
292.039	298.093	-0.110304
291.853	298.698	-0.110085
287.539	298.093	-0.111078
287.353	298.698	-0.110817
282.764	298.325	-0.110234
283.31	298.579	-0.11031
300.734	311.896	-0.106149
301.318	312.169	-0.106177
296.256	311.837	-0.106721
296.806	312.087	-0.106667
291.756	311.837	-0.10767
292.306	312.087	-0.107606
287.256	311.837	-0.108285
287.806	312.087	-0.108318
283.415	312.852	-0.108098
308.395	292.883	-0.109257
309.03	292.691	-0.109465
308.625	293.227	-0.109234
309.232	293.305	-0.10941
312.895	292.883	-0.110723
313.53	292.691	-0.110982
313.125	293.227	-0.110729
313.732	293.305	-0.110953
317.395	292.883	-0.112088
318.03	292.691	-0.112231
317.625	293.227	-0.112077
318.232	293.305	-0.112194
321.895	292.883	-0.112304
322.53	292.691	-0.112227
322.125	293.227	-0.112236
322.73	293.306	-0.112156
296.539	293.593	-0.110267
296.353	294.198	-0.110169
292.039	293.593	-0.111816
291.853	294.198	-0.111708
287.539	293.593	-0.112481
287.353	294.198	-0.112335
282.59	295.682	-0.111045
282.483	296.299	-0.110852
282.107	295.747	-0.110843
281.826	296.313	-0.110613
283.413	294.851	-0.111505
308.395	319.883	-0.109091
309.03	319.691	-0.109269
308.625	320.227	-0.109251
309.232	320.305	-0.109513
312.895	319.883	-0.110915
313.53	319.691	-0.111125
313.125	320.227	-0.111106
313.732	320.305	-0.111401
317.395	319.883	-0.112574
318.03	319.691	-0.112671
317.625	320.227	-0.112734
318.232	320.305	-0.112913
321.895	319.883	-0.113051
322.53	319.691	-0.112939
322.125	320.227	-0.113121
322.73	320.306	-0.113089
300.849	322.184	-0.108622
300.882	322.877	-0.108778
300.352	322.52	-0.108728
300.275	322.99	-0.108854
296.328	322.215	-0.109595
296.349	322.913	-0.10975
295.828	322.522	-0.109794
295.753	323	-0.109933
296.539	320.593	-0.109152
296.36	321.185	-0.109344
291.828	322.215	-0.110931
291.849	322.913	-0.111077
291.328	322.522	-0.111097
291.253	323	-0.11122
292.039	320.593	-0.110484
291.86	321.185	-0.110681
287.328	322.215	-0.111492
287.349	322.913	-0.111623
286.828	322.522	-0.111504
286.753	323	-0.111591
287.539	320.593	-0.111149
287.36	321.185	-0.11128
282.752	320.859	-0.110372
283.282	321.111	-0.110596
300.734	325.396	-0.109082
301.318	325.669	-0.109051
296.256	325.337	-0.110044
296.806	325.588	-0.109893
291.756	325.337	-0.111296
292.306	325.588	-0.111169
287.256	325.337	-0.111729
287.806	325.588	-0.111742
283.416	326.353	-0.110818
281.437	324.711	-0.110262
281.054	324.167	-0.110162
281.829	324	-0.11045
281.346	323.612	-0.110268
282.091	324.649	-0.110524
300.746	316.388	-0.107114
301.318	316.669	-0.107158
296.256	316.34	-0.107894
296.807	316.587	-0.107839
291.756	316.34	-0.109044
292.307	316.587	-0.109002
287.256	316.34	-0.10969
287.807	316.587	-0.109766
282.756	316.329	-0.108999
283.308	316.581	-0.109246
288.021	330.661	-0.110681
308.396	288.368	-0.109301
309.027	288.193	-0.109433
308.625	288.727	-0.109381
309.229	288.812	-0.10956
312.9	288.368	-0.110626
313.535	288.192	-0.110797
313.125	288.727	-0.110742
313.731	288.81	-0.11096
317.399	288.368	-0.111772
318.028	288.193	-0.111821
317.625	288.727	-0.111866
318.228	288.811	-0.111974
321.9	288.368	-0.111729
322.528	288.193	-0.111545
322.125	288.727	-0.111773
322.726	288.811	-0.111674
301.039	289.093	-0.109314
300.849	289.702	-0.109361
296.539	289.093	-0.11063
296.353	289.698	-0.110719
292.039	289.093	-0.112059
291.853	289.698	-0.112146
287.539	289.093	-0.112519
287.353	289.698	-0.112578
282.754	289.35	-0.111293
283.29	289.607	-0.111575
324.137	285.933	-0.110151
323.474	285.597	-0.110256
324.361	285.354	-0.109812
324.026	284.9	-0.109777
301.085	284.45	-0.108493
300.356	284.679	-0.108674
299.622	284.373	-0.108777
289.958	284.373	-0.111283
289.202	284.667	-0.111401
288.46	284.449	-0.111361
280.054	328.843	-0.108803
280.283	329.578	-0.108584
280.016	330.291	-0.108182
280.046	301.856	-0.108115
280.28	302.593	-0.107899
279.984	303.323	-0.107572
324.454	296.801	-0.111319
324.14	297.22	-0.111299
323.859	296.698	-0.111477
323.645	297.178	-0.111414
305.756	305.992	-0.106198
305.638	305.525	-0.106202
306.183	305.741	-0.106266
306.134	305.151	-0.106292
310.307	305.869	-0.107144
310.178	305.408	-0.107123
310.705	305.667	-0.107251
310.673	305.091	-0.107273
314.807	305.869	-0.108416
314.678	305.408	-0.108397
315.205	305.667	-0.108538
315.173	305.091	-0.108568
319.307	305.869	-0.109502
319.178	305.408	-0.109504
319.705	305.667	-0.109564
319.673	305.091	-0.109602
305.756	310.493	-0.106308
305.637	310.025	-0.106227
306.183	310.241	-0.106342
306.134	309.652	-0.106262
310.307	310.369	-0.107329
310.178	309.908	-0.107211
310.705	310.167	-0.107401
310.673	309.591	-0.107302
314.807	310.369	-0.108662
314.678	309.908	-0.108527
315.205	310.167	-0.108736
315.173	309.591	-0.108622
319.307	310.369	-0.109769
319.178	309.908	-0.109649
319.705	310.167	-0.109778
319.673	309.591	-0.109664
323.79	310.39	-0.109777
323.68	309.969	-0.109705
324.191	310.201	-0.109665
324.127	309.66	-0.109575
305.756	314.993	-0.107123
305.637	314.525	-0.106976
306.183	314.741	-0.107138
306.134	314.152	-0.106974
310.307	314.869	-0.108339
310.178	314.408	-0.108143
310.705	314.667	-0.108404
310.673	314.091	-0.108208
314.807	314.869	-0.10991
314.678	314.408	-0.109683
315.205	314.667	-0.109961
315.173	314.091	-0.109731
319.307	314.869	-0.11111
319.178	314.408	-0.110896
319.705	314.667	-0.111079
319.673	314.091	-0.110845
323.79	314.89	-0.11107
323.681	314.469	-0.11092
324.193	314.702	-0.110915
324.128	314.161	-0.11072
305.756	323.992	-0.109309
305.638	323.525	-0.109198
306.183	323.741	-0.109366
306.134	323.151	-0.109239
310.307	323.869	-0.110839
310.178	323.408	-0.110689
310.705	323.667	-0.11097
310.673	323.091	-0.110837
314.807	323.869	-0.112748
314.678	323.408	-0.112612
315.205	323.667	-0.112861
315.173	323.091	-0.112741
319.307	323.869	-0.113907
319.178	323.408	-0.113826
319.705	323.667	-0.113914
319.673	323.091	-0.113824
305.749	328.487	-0.109272
305.639	328.019	-0.1093
306.177	328.243	-0.109402
306.135	327.647	-0.10945
310.311	328.362	-0.1108
310.179	327.906	-0.110798
310.703	328.162	-0.110984
310.659	327.607	-0.111028
319.311	328.362	-0.113544
319.179	327.906	-0.113623
319.704	328.161	-0.1136
319.659	327.607	-0.113705
283.774	302.011	-0.109124
283.64	301.358	-0.109356
284.409	301.495	-0.109445
283.996	300.884	-0.109619
283.133	301.784	-0.10906
283.253	302.426	-0.108842
283.817	302.705	-0.108862
296.66	306.254	-0.106561
297.411	306.326	-0.10641
296.782	306.894	-0.10645
297.389	307.143	-0.10631
292.16	306.254	-0.107499
292.911	306.326	-0.107313
292.282	306.894	-0.107366
292.889	307.143	-0.107191
287.66	306.254	-0.1082
288.411	306.326	-0.108119
287.782	306.894	-0.10808
288.389	307.143	-0.107986
283.17	306.217	-0.1078
283.861	306.351	-0.107918
283.299	306.878	-0.107713
283.864	307.156	-0.107787
283.161	297.239	-0.110782
283.86	297.354	-0.110933
283.278	297.882	-0.110576
283.865	298.15	-0.110629
296.671	310.76	-0.106533
297.412	310.826	-0.106407
296.783	311.394	-0.10658
297.389	311.643	-0.1065
292.171	310.76	-0.107441
292.912	310.826	-0.107281
292.283	311.394	-0.107498
292.889	311.643	-0.107395
287.671	310.76	-0.108122
288.412	310.826	-0.108067
287.783	311.394	-0.108201
288.389	311.643	-0.108186
283.141	310.738	-0.107675
283.859	310.851	-0.107843
283.29	311.377	-0.107788
283.863	311.656	-0.107953
283.774	293.011	-0.11194
283.64	292.358	-0.111954
284.409	292.495	-0.112164
283.995	291.884	-0.112077
283.133	292.783	-0.111751
283.254	293.426	-0.111718
283.817	293.704	-0.111851
283.771	320.017	-0.110495
283.638	319.362	-0.110283
284.409	319.495	-0.110496
283.995	318.885	-0.110224
283.128	319.796	-0.110257
283.237	320.449	-0.110448
283.823	320.703	-0.110667
296.66	324.254	-0.109882
297.411	324.326	-0.109671
296.782	324.894	-0.109889
297.389	325.143	-0.109722
292.16	324.254	-0.111189
292.911	324.326	-0.110991
292.282	324.894	-0.111184
292.889	325.143	-0.111023
287.66	324.254	-0.111775
288.411	324.326	-0.111766
287.782	324.894	-0.111778
288.389	325.143	-0.11176
283.168	324.244	-0.110942
283.913	324.323	-0.111172
283.287	324.875	-0.110955
283.89	325.114	-0.111127
296.671	315.26	-0.107506
297.412	315.326	-0.107355
296.782	315.899	-0.107655
297.388	316.149	-0.107578
292.171	315.26	-0.108591
292.912	315.326	-0.108425
292.282	315.899	-0.108777
292.888	316.149	-0.1087
287.671	315.26	-0.109313
288.412	315.326	-0.109276
287.782	315.899	-0.109528
288.388	316.149	-0.109564
283.139	315.249	-0.108777
283.859	315.355	-0.108987
283.266	315.887	-0.109014
283.866	316.153	-0.109249
283.772	288.509	-0.111521
283.638	287.837	-0.111276
284.382	288.017	-0.111601
284.001	287.345	-0.111254
283.149	288.278	-0.111204
283.249	288.934	-0.111419
283.827	289.196	-0.111701
324.348	306.268	-0.109395
324.84	306.146	-0.10929
324.572	306.748	-0.109311
325.14	306.655	-0.109182
324.391	324.278	-0.113399
324.897	324.133	-0.113237
324.615	324.799	-0.113301
325.163	324.649	-0.113128
314.644	328.774	-0.112422
314.785	329.188	-0.11236
314.193	329.007	-0.112184
314.306	329.535	-0.112084
323.625	328.779	-0.112857
323.765	329.2	-0.112658
323.181	328.989	-0.112899
323.289	329.536	-0.112672
310.834	287.553	-0.109866
310.71	287.097	-0.109713
311.306	287.33	-0.10994
311.241	286.721	-0.109761
315.355	287.568	-0.111208
315.209	287.081	-0.11103
315.81	287.35	-0.111242
315.74	286.755	-0.111048
319.869	287.575	-0.111763
319.715	287.038	-0.111588
320.409	287.33	-0.111635
320.266	286.78	-0.111456
302.416	302.265	-0.106519
302.439	301.586	-0.106688
303.06	302.016	-0.106527
302.998	301.241	-0.106723
301.407	302.14	-0.106647
301.334	302.866	-0.106465
300.727	302.337	-0.106643
300.749	303.101	-0.106446
307.338	305.757	-0.10642
307.968	306.031	-0.106509
307.273	306.545	-0.106352
307.95	306.68	-0.106458
311.837	305.751	-0.107518
312.467	306.03	-0.10766
311.767	306.533	-0.107443
312.45	306.68	-0.107609
316.337	305.751	-0.108816
316.967	306.03	-0.108944
316.267	306.533	-0.10874
316.95	306.68	-0.108893
320.836	305.75	-0.109629
321.467	306.03	-0.109616
320.767	306.533	-0.109568
321.45	306.68	-0.109569
302.416	297.765	-0.107648
302.439	297.086	-0.107856
303.06	297.516	-0.107647
302.998	296.741	-0.107888
301.407	297.643	-0.107832
301.333	298.378	-0.107607
300.727	297.841	-0.107857
300.751	298.615	-0.107606
307.338	310.257	-0.106525
307.968	310.531	-0.106679
307.273	311.045	-0.1066
307.95	311.18	-0.10675
311.837	310.251	-0.107701
312.467	310.53	-0.107916
311.767	311.033	-0.1078
312.45	311.18	-0.108013
316.337	310.251	-0.109042
316.967	310.53	-0.109247
316.267	311.033	-0.109168
316.95	311.18	-0.109365
320.837	310.251	-0.109864
321.467	310.53	-0.109924
320.767	311.033	-0.110011
321.45	311.18	-0.110049
302.416	293.265	-0.108784
302.439	292.586	-0.108918
303.06	293.016	-0.108746
302.998	292.241	-0.108892
301.407	293.143	-0.108983
301.333	293.878	-0.108821
300.727	293.341	-0.109052
300.751	294.115	-0.108858
302.416	320.265	-0.108111
302.439	319.59	-0.107944
303.06	320.016	-0.108039
302.997	319.244	-0.107837
301.407	320.14	-0.108131
301.334	320.866	-0.108299
300.727	320.337	-0.108213
300.749	321.101	-0.108384
307.338	323.757	-0.10966
307.968	324.031	-0.109892
307.273	324.545	-0.109737
307.95	324.68	-0.109952
311.837	323.751	-0.111448
312.467	324.03	-0.111749
311.767	324.533	-0.111513
312.45	324.68	-0.111805
316.337	323.751	-0.113227
316.967	324.03	-0.113427
316.267	324.533	-0.113274
316.95	324.68	-0.113457
320.836	323.75	-0.113921
321.467	324.03	-0.1139
320.767	324.533	-0.113961
321.45	324.68	-0.11391
307.338	314.757	-0.107366
307.968	315.031	-0.107585
307.273	315.545	-0.10754
307.95	315.68	-0.107738
311.837	314.751	-0.108785
312.467	315.03	-0.109083
311.767	315.533	-0.109005
312.45	315.68	-0.109284
316.337	314.751	-0.110318
316.967	315.03	-0.110593
316.267	315.533	-0.110587
316.95	315.68	-0.110828
320.837	314.751	-0.111179
321.467	315.03	-0.111287
320.767	315.533	-0.111473
321.45	315.68	-0.11153
307.334	328.269	-0.10969
307.965	328.542	-0.109835
307.255	329.079	-0.109521
307.949	329.2	-0.109698
311.835	328.242	-0.111406
312.461	328.529	-0.111592
311.758	328.996	-0.111218
312.45	329.18	-0.111433
316.33	328.278	-0.113016
316.964	328.544	-0.113102
316.248	329.085	-0.112801
316.947	329.198	-0.112923
320.836	328.242	-0.113524
321.462	328.529	-0.11337
320.762	328.999	-0.113315
321.45	329.18	-0.113165
293.03	330.202	-0.110238
292.624	329.898	-0.110426
293.214	329.747	-0.11031
292.788	329.319	-0.110541
284.022	330.218	-0.109961
283.62	329.897	-0.109927
284.18	329.788	-0.110165
283.78	329.322	-0.110193
302.391	288.776	-0.109052
302.462	288.088	-0.108982
303.06	288.517	-0.108933
302.991	287.745	-0.108854
308.812	304.493	-0.10678
309.228	304.82	-0.106862
308.491	304.882	-0.106665
308.703	305.541	-0.106691
307.949	305.352	-0.106539
307.846	304.769	-0.106536
307.318	305.115	-0.106449
313.312	304.493	-0.108004
313.728	304.82	-0.108103
312.991	304.882	-0.107863
313.203	305.541	-0.107896
312.449	305.351	-0.107692
312.346	304.769	-0.107687
311.819	305.114	-0.107549
317.812	304.493	-0.109263
318.228	304.82	-0.109327
317.491	304.882	-0.109138
317.703	305.541	-0.10915
316.949	305.351	-0.108984
316.846	304.769	-0.108991
316.319	305.114	-0.108856
322.312	304.493	-0.109721
322.694	304.793	-0.109673
321.991	304.882	-0.109682
322.192	305.535	-0.109636
321.447	305.35	-0.10966
321.346	304.769	-0.109694
320.819	305.114	-0.109674
299.825	304.761	-0.106211
299.832	305.336	-0.106164
295.301	304.746	-0.10702
295.332	305.336	-0.106934
290.801	304.746	-0.108028
290.832	305.336	-0.107918
286.301	304.746	-0.108485
286.332	305.336	-0.108376
282.951	304.298	-0.108151
282.376	304.213	-0.107987
308.812	308.993	-0.106671
309.228	309.32	-0.10682
308.491	309.382	-0.106625
308.703	310.041	-0.106782
307.949	309.852	-0.10658
307.846	309.269	-0.106466
307.318	309.615	-0.106436
313.312	308.993	-0.107909
313.728	309.32	-0.108085
312.991	309.382	-0.107855
313.203	310.041	-0.108046
312.449	309.851	-0.107791
312.346	309.269	-0.107651
311.819	309.614	-0.10759
317.812	308.993	-0.109166
318.228	309.32	-0.109315
317.491	309.382	-0.10914
317.703	310.041	-0.109327
316.949	309.851	-0.109107
316.846	309.269	-0.108962
316.319	309.614	-0.108917
322.312	308.993	-0.109626
322.728	309.32	-0.109656
321.991	309.382	-0.109685
322.203	310.041	-0.109811
321.449	309.851	-0.109787
321.346	309.269	-0.109668
320.819	309.614	-0.109741
326.306	309.714	-0.109045
325.792	310.094	-0.109254
325.776	309.36	-0.109109
325.277	309.701	-0.109315
299.82	309.207	-0.105906
299.872	309.748	-0.10597
295.32	309.207	-0.106571
295.363	309.756	-0.106631
290.82	309.207	-0.107496
290.863	309.756	-0.107555
286.32	309.207	-0.107929
286.363	309.756	-0.107992
282.11	309.588	-0.107278
281.759	310.115	-0.107212
281.701	309.377	-0.107118
281.215	309.7	-0.107005
282.93	308.818	-0.10747
282.498	309.27	-0.107368
282.356	308.716	-0.107285
282.11	309.133	-0.10724
326.347	300.835	-0.109781
325.85	301.126	-0.109854
325.8	300.374	-0.110014
325.282	300.697	-0.110101
303.839	300.386	-0.10687
303.507	300.852	-0.106782
303.33	300.249	-0.106895
302.848	300.575	-0.106873
282.198	300.65	-0.109204
281.869	301.152	-0.108913
281.734	300.388	-0.109121
281.224	300.767	-0.108836
308.812	313.493	-0.107385
309.228	313.82	-0.107606
308.491	313.882	-0.107385
308.703	314.541	-0.107655
307.949	314.352	-0.107389
307.846	313.769	-0.107181
307.318	314.115	-0.107184
313.312	313.493	-0.108825
313.728	313.82	-0.109084
312.991	313.882	-0.108834
313.203	314.541	-0.109164
312.449	314.351	-0.108836
312.346	313.769	-0.10858
311.819	314.114	-0.10856
317.812	313.493	-0.110198
318.228	313.82	-0.110426
317.491	313.882	-0.110253
317.703	314.541	-0.110587
316.949	314.351	-0.110314
316.846	313.769	-0.11004
316.319	314.114	-0.110061
322.312	313.493	-0.110654
322.728	313.82	-0.110752
321.991	313.882	-0.110802
322.203	314.541	-0.111067
321.449	314.351	-0.111013
321.346	313.769	-0.110766
320.819	314.114	-0.110922
326.352	314.239	-0.110163
325.809	314.618	-0.11046
325.786	313.871	-0.110164
325.271	314.209	-0.110452
299.82	313.707	-0.106491
299.872	314.248	-0.106649
295.32	313.707	-0.107267
295.363	314.256	-0.107454
290.82	313.707	-0.10828
290.863	314.256	-0.108487
286.32	313.707	-0.108707
286.363	314.256	-0.108922
282.109	314.09	-0.108088
281.754	314.626	-0.108147
281.701	313.878	-0.107867
281.193	314.243	-0.107837
282.93	313.318	-0.108095
282.498	313.771	-0.108105
282.356	313.216	-0.107873
282.11	313.633	-0.107934
303.839	295.886	-0.108046
303.507	296.352	-0.10795
303.33	295.749	-0.108088
302.848	296.075	-0.108069
282.949	295.3	-0.111255
282.376	295.212	-0.111045
308.812	322.493	-0.109865
309.228	322.82	-0.110113
308.491	322.882	-0.109827
308.703	323.541	-0.110068
307.949	323.352	-0.10976
307.846	322.769	-0.109576
307.318	323.115	-0.109524
313.312	322.493	-0.11178
313.728	322.82	-0.112046
312.991	322.882	-0.111726
313.203	323.541	-0.11198
312.449	323.351	-0.111617
312.346	322.769	-0.111422
311.819	323.114	-0.111309
317.812	322.493	-0.113357
318.228	322.82	-0.113526
317.491	322.882	-0.113356
317.703	323.541	-0.113544
316.949	323.351	-0.113323
316.846	322.769	-0.113162
316.319	323.114	-0.11311
322.312	322.493	-0.113598
322.694	322.793	-0.113607
321.991	322.882	-0.113694
322.192	323.535	-0.11378
321.447	323.35	-0.113828
321.346	322.769	-0.113721
320.819	323.114	-0.113833
299.825	322.761	-0.10883
299.832	323.336	-0.108974
295.301	322.746	-0.109978
295.332	323.336	-0.110117
290.801	322.746	-0.111231
290.832	323.336	-0.111354
286.301	322.746	-0.111474
286.332	323.336	-0.111588
281.824	322.719	-0.110334
281.859	323.289	-0.110429
308.812	326.993	-0.110275
309.228	327.319	-0.110423
308.491	327.382	-0.110127
308.703	328.041	-0.11016
307.948	327.855	-0.109916
307.846	327.269	-0.109912
307.318	327.616	-0.109751
313.312	326.993	-0.112127
313.72	327.333	-0.112264
312.991	327.382	-0.111956
313.193	328.058	-0.111965
312.449	327.854	-0.111697
312.346	327.269	-0.111707
311.819	327.613	-0.111484
317.812	326.993	-0.113527
318.228	327.319	-0.113568
317.491	327.382	-0.113409
317.703	328.041	-0.113359
316.949	327.857	-0.113232
316.846	327.269	-0.113278
316.318	327.621	-0.113123
322.312	326.993	-0.113568
322.723	327.332	-0.113434
321.991	327.382	-0.113547
322.194	328.058	-0.113377
321.45	327.854	-0.113538
321.346	327.269	-0.113651
320.819	327.613	-0.11366
326.335	327.836	-0.112122
325.794	328.145	-0.112242
325.785	327.389	-0.112439
325.257	327.723	-0.112572
299.82	327.207	-0.109116
299.872	327.748	-0.109084
295.32	327.207	-0.110203
295.363	327.756	-0.110145
290.82	327.207	-0.111302
290.863	327.756	-0.111234
286.32	327.207	-0.111383
286.363	327.756	-0.111303
282.103	327.567	-0.110056
281.761	328.129	-0.10975
281.692	327.371	-0.109916
281.214	327.765	-0.109623
282.929	326.818	-0.110554
282.493	327.264	-0.110289
282.355	326.715	-0.110322
282.11	327.133	-0.110152
326.307	318.735	-0.111747
325.794	319.09	-0.112029
325.783	318.353	-0.111743
325.259	318.689	-0.112043
303.839	318.386	-0.107601
303.507	318.852	-0.10773
303.33	318.249	-0.107514
302.848	318.575	-0.10763
282.199	318.648	-0.109601
281.872	319.145	-0.109649
281.734	318.388	-0.109324
281.244	318.742	-0.109292
311.119	330.743	-0.110542
310.821	330.241	-0.110562
311.588	330.192	-0.110839
311.292	329.657	-0.110883
320.211	330.697	-0.112814
319.86	330.184	-0.113002
320.605	330.191	-0.112927
320.317	329.677	-0.113138
302.243	330.725	-0.108347
301.861	330.073	-0.108519
302.558	330.212	-0.108451
302.366	329.691	-0.108598
300.768	329.802	-0.108636
301.132	330.22	-0.108517
300.482	330.211	-0.108533
300.827	330.734	-0.1084
297.717	330.757	-0.108872
297.336	330.089	-0.109149
298.057	330.212	-0.108909
297.797	329.706	-0.109129
296.252	329.818	-0.109494
296.606	330.201	-0.109309
295.998	330.212	-0.109431
296.308	330.738	-0.109236
293.212	330.658	-0.110049
293.588	330.187	-0.110057
287.242	329.797	-0.110875
287.608	330.167	-0.110801
286.975	330.199	-0.110687
287.327	330.683	-0.110599
284.212	330.664	-0.10986
284.583	330.193	-0.110131
326.307	291.736	-0.111096
325.794	292.09	-0.111321
325.783	291.353	-0.111209
325.259	291.689	-0.111464
303.839	291.386	-0.108899
303.507	291.852	-0.108887
303.33	291.249	-0.108926
302.848	291.575	-0.108973
282.199	291.648	-0.111399
281.873	292.144	-0.111283
281.734	291.389	-0.111161
281.245	291.742	-0.111003
303.848	286.898	-0.108603
303.507	287.354	-0.108726
303.33	286.753	-0.108599
302.85	287.084	-0.108746
324.657	284.239	-0.109239
324.931	284.854	-0.109334
323.649	284.33	-0.109718
301.975	284.406	-0.10832
301.707	285.091	-0.108504
300.951	285.163	-0.10866
297.706	285.148	-0.109502
296.92	285.083	-0.109748
297.707	284.415	-0.109359
296.625	284.395	-0.109701
288.622	285.14	-0.111538
287.85	285.09	-0.111483
287.565	284.415	-0.111267
280.016	327.96	-0.109105
280.69	328.247	-0.10927
280.741	329.016	-0.109006
280.018	300.96	-0.108429
280.667	301.257	-0.108507
280.737	302.022	-0.108243
309.859	332.084	-0.109778
309.548	331.486	-0.109764
310.443	331.33	-0.11016
309.883	331.031	-0.110006
310.884	331.982	-0.110193
327.688	329.058	-0.111208
327.086	329.373	-0.111278
326.938	328.488	-0.111693
326.638	329.046	-0.111589
327.592	328.051	-0.111623
327.695	302.086	-0.109197
327.097	302.397	-0.109242
326.941	301.502	-0.109497
326.642	302.062	-0.109437
327.593	301.061	-0.109451
326.862	309.403	-0.108859
280.691	309.402	-0.106831
326.907	300.496	-0.109714
280.692	300.406	-0.108796
326.878	313.877	-0.1099
280.677	313.877	-0.107566
326.907	327.491	-0.112015
280.682	327.414	-0.109504
326.83	318.388	-0.11148
280.726	318.388	-0.109004
311.449	331.297	-0.110531
320.557	331.219	-0.112618
302.547	331.254	-0.108224
300.488	331.268	-0.108298
298.141	331.303	-0.10864
296.012	331.275	-0.109172
293.496	331.208	-0.109827
287.033	331.22	-0.110389
284.495	331.212	-0.109766
326.829	291.388	-0.110861
280.726	291.388	-0.110761
280.024	284.413	-0.108133
327.549	284.396	-0.107934
296.509	305.615	-0.106686
297.007	305.21	-0.106655
297.029	305.806	-0.106566
297.548	305.618	-0.106488
292.009	305.615	-0.107649
292.507	305.21	-0.107618
292.529	305.806	-0.107503
293.048	305.618	-0.107409
287.509	305.615	-0.108333
288.007	305.21	-0.108387
288.029	305.806	-0.108265
288.548	305.618	-0.108243
283.054	305.578	-0.107897
283.546	305.235	-0.108083
283.53	305.806	-0.107966
284.039	305.639	-0.10809
305.571	306.44	-0.106136
305.253	305.973	-0.106119
296.529	310.146	-0.106498
297.019	309.771	-0.106381
297.033	310.308	-0.106434
297.545	310.14	-0.106322
292.029	310.146	-0.107401
292.519	309.771	-0.107261
292.533	310.308	-0.107317
293.045	310.14	-0.107176
287.529	310.146	-0.108057
288.019	309.771	-0.107992
288.033	310.308	-0.108049
288.545	310.14	-0.107973
283.019	310.129	-0.107583
283.529	309.76	-0.107671
283.515	310.317	-0.107722
284.032	310.145	-0.1078
305.571	310.94	-0.10632
305.253	310.473	-0.106213
296.529	314.646	-0.10736
297.019	314.271	-0.107149
297.033	314.808	-0.107306
297.545	314.64	-0.107142
292.029	314.646	-0.108413
292.519	314.271	-0.108171
292.533	314.808	-0.108356
293.045	314.64	-0.108163
287.529	314.646	-0.109101
288.019	314.271	-0.108942
288.033	314.808	-0.109136
288.545	314.64	-0.109019
283.019	314.633	-0.108544
283.528	314.261	-0.108553
283.515	314.829	-0.108741
284.032	314.646	-0.108788
283.024	296.592	-0.110953
283.535	296.229	-0.111215
283.519	296.799	-0.11104
284.032	296.627	-0.111226
296.509	323.615	-0.109844
297.007	323.21	-0.109628
297.029	323.806	-0.109727
297.548	323.618	-0.109546
292.009	323.615	-0.111161
292.507	323.21	-0.110967
292.529	323.806	-0.111054
293.048	323.618	-0.110876
287.509	323.615	-0.111729
288.007	323.21	-0.111682
288.029	323.806	-0.111753
288.548	323.618	-0.11171
283.021	323.613	-0.110879
283.532	323.23	-0.111012
283.539	323.81	-0.111059
284.048	323.633	-0.111191
305.571	324.44	-0.109315
305.253	323.973	-0.109185
315.134	327.678	-0.112781
315.193	328.245	-0.112712
314.668	328.023	-0.112569
314.789	328.453	-0.112544
324.116	327.707	-0.113
324.147	328.277	-0.11284
323.664	328.032	-0.11306
323.769	328.467	-0.112914
296.554	328.171	-0.109784
297.032	327.769	-0.109714
297.071	328.329	-0.109625
297.563	328.1	-0.109527
292.06	328.172	-0.110968
292.537	327.77	-0.110931
292.575	328.323	-0.110829
293.068	328.1	-0.110742
287.557	328.17	-0.111372
288.035	327.769	-0.111479
288.077	328.326	-0.111364
288.569	328.1	-0.111408
283.048	328.144	-0.110295
283.549	327.752	-0.110592
283.572	328.309	-0.110452
284.068	328.095	-0.11068
305.571	315.44	-0.107186
305.253	314.973	-0.107011
305.571	328.919	-0.109153
305.252	328.468	-0.109155
306.239	287.651	-0.108879
306.743	288.049	-0.108993
306.243	288.196	-0.108968
305.797	288.039	-0.108904
296.479	300.894	-0.107956
296.932	301.302	-0.107703
296.316	301.558	-0.107772
296.752	301.982	-0.10752
291.979	300.894	-0.109181
292.432	301.302	-0.108901
291.816	301.558	-0.10895
292.252	301.982	-0.108671
287.479	300.894	-0.109928
287.932	301.302	-0.109732
287.316	301.558	-0.109654
287.751	301.981	-0.109458
296.479	296.394	-0.109515
296.932	296.803	-0.109229
296.316	297.058	-0.109343
296.752	297.483	-0.109047
291.979	296.394	-0.111018
292.432	296.802	-0.110732
291.816	297.058	-0.110808
292.252	297.482	-0.11051
287.479	296.394	-0.111747
287.932	296.802	-0.111591
287.316	297.058	-0.111507
287.752	297.482	-0.111331
296.516	318.827	-0.108643
296.935	319.3	-0.108682
296.316	319.558	-0.108929
296.752	319.982	-0.108932
292.016	318.827	-0.10992
292.435	319.299	-0.10998
291.816	319.558	-0.110229
292.252	319.982	-0.110253
287.516	318.827	-0.110614
287.929	319.314	-0.110771
287.316	319.558	-0.110859
287.751	319.98	-0.110985
296.479	291.894	-0.110617
296.932	292.303	-0.1104
296.316	292.558	-0.110578
296.752	292.983	-0.110338
291.979	291.894	-0.112127
292.432	292.302	-0.111955
291.816	292.558	-0.112089
292.252	292.982	-0.111894
287.479	291.894	-0.112705
287.932	292.302	-0.112687
287.316	292.558	-0.112645
287.751	292.981	-0.1126
301.038	287.521	-0.109155
301.426	287.968	-0.109152
300.818	288.083	-0.109282
301.24	288.54	-0.109244
296.509	287.365	-0.110411
296.938	287.828	-0.110354
296.315	288.057	-0.110598
296.753	288.484	-0.110506
291.979	287.457	-0.11181
292.44	287.831	-0.11178
291.836	288.052	-0.111963
292.256	288.494	-0.111936
287.508	287.366	-0.112141
287.939	287.818	-0.112296
287.315	288.058	-0.112301
287.752	288.483	-0.112431
301.027	301.652	-0.106813
301.519	301.608	-0.106783
301.948	301.838	-0.106676
301.896	302.553	-0.106496
301.116	305.508	-0.106071
301.365	305.964	-0.106016
300.696	306.102	-0.106021
301.33	306.514	-0.105956
323.799	297.666	-0.111253
324.457	297.75	-0.111078
324.616	297.258	-0.111175
301.027	297.152	-0.108045
301.519	297.109	-0.10799
301.948	297.338	-0.107852
301.895	298.056	-0.10763
283.681	300.493	-0.109705
283.515	300.865	-0.109524
283.2	300.451	-0.109589
283.012	301.111	-0.109287
301.153	309.994	-0.105966
301.38	310.453	-0.106006
300.71	310.587	-0.10602
301.331	311.013	-0.106052
301.027	292.652	-0.109151
301.519	292.609	-0.109076
301.948	292.838	-0.108954
301.895	293.556	-0.108804
301.028	319.654	-0.108032
301.519	319.609	-0.107998
301.948	319.838	-0.108031
301.896	320.553	-0.1082
301.116	323.508	-0.108891
301.365	323.964	-0.108947
300.696	324.102	-0.109004
301.33	324.514	-0.109002
301.153	314.494	-0.106668
301.38	314.953	-0.106774
300.71	315.087	-0.106818
301.331	315.513	-0.106897
283.681	318.493	-0.110021
283.515	318.865	-0.110102
283.2	318.451	-0.109867
283.012	319.113	-0.110025
301.161	327.977	-0.108963
301.384	328.447	-0.108888
300.714	328.583	-0.108893
301.336	329.003	-0.108784
323.839	288.674	-0.111336
324.124	288.245	-0.111114
324.514	288.617	-0.111078
324.484	287.986	-0.110887
283.681	291.493	-0.111972
283.515	291.865	-0.111927
283.2	291.452	-0.111793
283.012	292.111	-0.111739
325.527	305.247	-0.109172
325.355	306.003	-0.109171
324.839	305.531	-0.109328
300.455	305.484	-0.106106
295.955	305.484	-0.106803
295.779	301.626	-0.107877
291.455	305.484	-0.107782
291.279	301.626	-0.10904
286.955	305.484	-0.108367
286.775	301.626	-0.109624
283.024	304.918	-0.108028
300.513	309.908	-0.105967
295.973	309.961	-0.106563
291.473	309.961	-0.107482
286.973	309.961	-0.108041
282.99	309.487	-0.10752
282.46	309.935	-0.107409
305.538	300.418	-0.107016
305.681	301.042	-0.106916
305.032	300.894	-0.106862
305.266	301.469	-0.106777
300.487	300.573	-0.107134
301.095	300.533	-0.107074
300.769	301.121	-0.106976
301.33	301.124	-0.106915
300.292	301.124	-0.107032
295.779	297.126	-0.109489
291.279	297.126	-0.110914
286.779	297.126	-0.111462
282.443	301.017	-0.109155
282.465	301.593	-0.108939
281.928	302.02	-0.108598
300.513	314.408	-0.106663
295.973	314.461	-0.107409
291.473	314.461	-0.108459
286.973	314.461	-0.109032
282.989	313.987	-0.108322
282.459	314.437	-0.108312
282.479	310.582	-0.107476
281.898	310.971	-0.107337
305.538	295.918	-0.108154
305.681	296.542	-0.108029
305.032	296.394	-0.107991
305.266	296.969	-0.107872
300.487	296.073	-0.108434
301.095	296.033	-0.108342
300.769	296.621	-0.108245
301.33	296.624	-0.108153
300.292	296.624	-0.108328
295.779	292.626	-0.110751
291.279	292.626	-0.112206
286.774	292.626	-0.112592
283.015	295.924	-0.111135
325.527	323.195	-0.112964
325.387	323.983	-0.11307
324.87	323.505	-0.113213
300.455	323.484	-0.108937
295.955	323.484	-0.109975
295.78	319.628	-0.109096
291.455	323.484	-0.111264
291.28	319.628	-0.110376
286.955	323.484	-0.111679
286.776	319.626	-0.110859
282.437	323.481	-0.11066
300.515	327.903	-0.109009
295.973	327.962	-0.109964
291.473	327.962	-0.111112
286.973	327.962	-0.111357
282.991	327.484	-0.110443
282.458	327.938	-0.110108
305.538	318.418	-0.10792
305.681	319.042	-0.108146
305.032	318.894	-0.107958
305.266	319.469	-0.108181
300.514	318.6	-0.107747
301.113	318.573	-0.107706
300.771	319.127	-0.107901
301.333	319.137	-0.107871
300.296	319.117	-0.107934
282.443	319.016	-0.109812
282.465	319.596	-0.109986
281.913	320.024	-0.109901
282.478	315.089	-0.108528
281.902	315.522	-0.108474
282.483	328.594	-0.109912
281.918	329.033	-0.109499
305.538	291.418	-0.108981
305.681	292.042	-0.108954
305.032	291.894	-0.108904
305.266	292.469	-0.108863
324.907	288.16	-0.110778
325.161	288.628	-0.110825
300.484	291.574	-0.109388
301.094	291.534	-0.109274
300.767	292.121	-0.109283
301.329	292.124	-0.109177
300.292	292.124	-0.10938
300.279	288.153	-0.109402
295.782	288.132	-0.110783
291.277	288.141	-0.112088
286.776	288.127	-0.112242
282.444	292.015	-0.111519
282.466	292.594	-0.111511
281.921	293.006	-0.111257
305.529	286.854	-0.10865
305.668	287.487	-0.108797
305.031	287.367	-0.108725
305.244	287.94	-0.108843
306.165	287.074	-0.108754
306.777	287.387	-0.108878
306.72	286.703	-0.108718
301.632	287.448	-0.109034
301.816	287.001	-0.108915
302.279	287.398	-0.108903
302.231	286.739	-0.108776
298.727	305.207	-0.106312
298.7	305.858	-0.10624
298.137	305.404	-0.106399
298.075	306.096	-0.106318
294.227	305.206	-0.107182
294.199	305.858	-0.107082
293.637	305.404	-0.107297
293.575	306.096	-0.107191
289.727	305.206	-0.10813
289.699	305.858	-0.108011
289.137	305.404	-0.108197
289.075	306.096	-0.10807
285.226	305.207	-0.108321
285.195	305.861	-0.108189
284.636	305.409	-0.108221
284.56	306.105	-0.108073
302.72	305.842	-0.105959
303.166	306.206	-0.105925
302.614	306.638	-0.105884
303.288	306.712	-0.105872
298.729	309.703	-0.106073
298.702	310.356	-0.106148
298.14	309.907	-0.106192
298.076	310.596	-0.10627
294.23	309.697	-0.10684
294.202	310.352	-0.106923
293.641	309.905	-0.107004
293.576	310.596	-0.107096
289.73	309.697	-0.107733
289.702	310.352	-0.107818
289.141	309.905	-0.10786
289.076	310.596	-0.10795
285.228	309.698	-0.107903
285.198	310.355	-0.107972
284.635	309.909	-0.107864
284.559	310.605	-0.107928
308.487	301.305	-0.107302
309.18	300.959	-0.107557
308.648	300.686	-0.107462
312.987	301.305	-0.108609
313.68	300.959	-0.108928
313.148	300.686	-0.108813
317.487	301.305	-0.109948
318.18	300.959	-0.110211
317.648	300.686	-0.110154
321.987	301.305	-0.110461
322.679	300.958	-0.110512
322.147	300.685	-0.110614
302.721	310.342	-0.105963
303.166	310.706	-0.106008
302.614	311.137	-0.106032
303.288	311.212	-0.106049
298.729	314.203	-0.10677
298.702	314.856	-0.106962
298.14	314.407	-0.106945
298.076	315.096	-0.107149
294.23	314.197	-0.107685
294.202	314.852	-0.107922
293.641	314.405	-0.107917
293.576	315.096	-0.10817
289.73	314.197	-0.10866
289.702	314.852	-0.108913
289.141	314.405	-0.108844
289.076	315.096	-0.109107
285.228	314.198	-0.1088
285.198	314.855	-0.109036
284.635	314.409	-0.108806
284.56	315.106	-0.109036
308.487	296.805	-0.108422
309.18	296.459	-0.108708
308.648	296.186	-0.108612
312.987	296.805	-0.109894
313.68	296.459	-0.110247
313.148	296.186	-0.110111
317.487	296.805	-0.111327
318.18	296.459	-0.111576
317.648	296.186	-0.111524
321.987	296.805	-0.111705
322.684	296.475	-0.111709
322.148	296.187	-0.111819
298.727	323.207	-0.109143
298.7	323.858	-0.109272
298.137	323.404	-0.109338
298.075	324.096	-0.109462
294.227	323.206	-0.110416
294.199	323.858	-0.110544
293.637	323.404	-0.110651
293.575	324.096	-0.11077
289.727	323.206	-0.111507
289.699	323.858	-0.111603
289.137	323.404	-0.111623
289.075	324.096	-0.111701
285.228	323.206	-0.111396
285.2	323.858	-0.111459
284.64	323.407	-0.11131
284.576	324.096	-0.11134
302.72	323.842	-0.108872
303.166	324.206	-0.10893
302.614	324.638	-0.108956
303.288	324.712	-0.108973
298.729	327.7	-0.109277
298.701	328.346	-0.109206
298.143	327.89	-0.1094
298.078	328.556	-0.109316
294.231	327.694	-0.110463
294.202	328.342	-0.110372
293.656	327.885	-0.110609
293.583	328.557	-0.110507
289.73	327.697	-0.111385
289.702	328.345	-0.111268
289.155	327.884	-0.111413
289.085	328.558	-0.111275
285.231	327.694	-0.111088
285.202	328.342	-0.110925
284.647	327.89	-0.1109
284.583	328.558	-0.110701
308.487	319.305	-0.108951
309.18	318.959	-0.109097
308.648	318.686	-0.108795
312.987	319.305	-0.110758
313.68	318.959	-0.110925
313.148	318.686	-0.110583
317.487	319.305	-0.112391
318.18	318.959	-0.112432
317.648	318.686	-0.112176
321.987	319.305	-0.11286
322.679	318.958	-0.112677
322.147	318.685	-0.112616
302.721	314.842	-0.10671
303.166	315.206	-0.106805
302.614	315.637	-0.106882
303.288	315.712	-0.106911
302.722	328.331	-0.108865
303.161	328.69	-0.108821
302.621	329.075	-0.10873
303.276	329.201	-0.108717
308.487	292.305	-0.109367
309.18	291.959	-0.109596
308.648	291.686	-0.109455
312.987	292.305	-0.110832
313.68	291.959	-0.111106
313.148	291.686	-0.110921
317.487	292.305	-0.112154
318.18	291.959	-0.112287
317.648	291.686	-0.112184
321.987	292.305	-0.112312
322.678	291.958	-0.112195
322.147	291.685	-0.112259
308.459	287.791	-0.109225
309.182	287.448	-0.109338
308.653	287.183	-0.109135
312.959	287.791	-0.110528
313.687	287.454	-0.110675
313.145	287.178	-0.110422
317.459	287.791	-0.111641
318.183	287.454	-0.111638
317.643	287.178	-0.111478
321.959	287.791	-0.111538
322.673	287.433	-0.111247
322.163	287.187	-0.111269
280.57	305.333	-0.107234
281.229	305.373	-0.10741
280.91	306.06	-0.107183
281.564	305.959	-0.107395
280.598	296.367	-0.110184
281.235	296.374	-0.11039
280.931	297.066	-0.110079
281.548	296.935	-0.110333
280.598	287.366	-0.10967
281.259	287.369	-0.109976
280.939	288.068	-0.110104
281.573	287.948	-0.110358
283.05	331.353	-0.10916
282.997	330.727	-0.109351
283.677	331.059	-0.109532
283.516	330.512	-0.10966
292.07	331.326	-0.110163
292	330.717	-0.110328
292.681	331.048	-0.110102
292.517	330.501	-0.110284
306.017	330.352	-0.108929
306.627	330.702	-0.108994
305.923	331.038	-0.108749
306.612	331.375	-0.108848
315.083	330.455	-0.112109
315.621	330.697	-0.112202
314.906	331.03	-0.111899
315.578	331.347	-0.11203
324.083	330.454	-0.112068
324.619	330.697	-0.111757
323.905	331.03	-0.111923
324.578	331.347	-0.111543
326.016	305.932	-0.109009
326.288	305.353	-0.108979
326.645	306.06	-0.108847
326.985	305.333	-0.108822
326.013	296.905	-0.110843
326.307	296.324	-0.110866
326.641	297.04	-0.110636
326.957	296.367	-0.110685
325.978	287.942	-0.110232
326.289	287.346	-0.109833
326.614	288.063	-0.110017
326.957	287.366	-0.109572
307.799	301.785	-0.107044
308.037	302.405	-0.106921
312.299	301.785	-0.108265
312.537	302.405	-0.108143
316.799	301.785	-0.109633
317.037	302.405	-0.109485
321.299	301.785	-0.110335
321.537	302.405	-0.110133
307.799	297.285	-0.108125
308.037	297.905	-0.107962
312.299	297.285	-0.109505
312.537	297.905	-0.109361
316.799	297.285	-0.111005
317.037	297.905	-0.110827
321.299	297.285	-0.111614
321.537	297.905	-0.111395
307.799	292.785	-0.109137
308.037	293.405	-0.109042
312.299	292.785	-0.110529
312.537	293.405	-0.110476
316.799	292.785	-0.11197
317.037	293.405	-0.111915
321.299	292.785	-0.112371
321.537	293.405	-0.11227
307.799	319.785	-0.108868
308.037	320.405	-0.109083
312.299	319.785	-0.110633
312.537	320.405	-0.110899
316.799	319.785	-0.112373
317.037	320.405	-0.112621
321.299	319.785	-0.11305
321.537	320.405	-0.113196
307.819	288.288	-0.109169
308.037	288.905	-0.109253
312.336	288.288	-0.110433
312.549	288.911	-0.110573
316.836	288.289	-0.111659
317.049	288.911	-0.111794
321.338	288.289	-0.111801
321.549	288.911	-0.111906
304.757	303.136	-0.106311
305.109	303.721	-0.106259
304.735	304.209	-0.106149
307.252	304.546	-0.106465
307.214	304.034	-0.106505
306.932	303.563	-0.106531
307.305	303.154	-0.106648
307.482	302.566	-0.106795
308.845	302.676	-0.107053
309.303	302.789	-0.107157
309.341	303.294	-0.107062
309.621	303.741	-0.107075
309.222	304.203	-0.106901
311.752	304.546	-0.107565
311.714	304.034	-0.107608
311.432	303.563	-0.107609
311.805	303.154	-0.107776
311.982	302.566	-0.107957
313.345	302.676	-0.108327
313.803	302.789	-0.108453
313.841	303.294	-0.108343
314.121	303.741	-0.108359
313.722	304.203	-0.108153
316.252	304.546	-0.108884
316.214	304.034	-0.108938
315.932	303.563	-0.108951
316.305	303.154	-0.109125
316.482	302.566	-0.109316
317.845	302.676	-0.109612
318.303	302.789	-0.109697
318.341	303.294	-0.109579
318.621	303.741	-0.109558
318.222	304.203	-0.109388
320.752	304.546	-0.109718
320.714	304.034	-0.109781
320.432	303.563	-0.109853
320.805	303.154	-0.109949
320.982	302.566	-0.110099
322.345	302.676	-0.110048
322.803	302.789	-0.110002
322.84	303.293	-0.109882
323.116	303.737	-0.109782
322.712	304.195	-0.109735
325.963	304.76	-0.109092
325.294	304.54	-0.109282
325.218	304.034	-0.10936
324.932	303.563	-0.109506
325.274	303.172	-0.109496
325.389	302.641	-0.109589
325.881	302.582	-0.109476
326.246	302.277	-0.109467
326.614	302.558	-0.109312
304.256	304.633	-0.106062
303.641	304.989	-0.106004
303.268	304.638	-0.106032
302.753	304.485	-0.106063
302.721	304	-0.106123
303.34	302.595	-0.106361
303.778	302.218	-0.106453
304.301	302.685	-0.106363
302.472	303.527	-0.106217
302.793	303.186	-0.10626
302.837	302.685	-0.106368
299.287	305.001	-0.106244
298.747	304.647	-0.106367
300.329	304.045	-0.10628
300.281	303.274	-0.106434
300.605	303.658	-0.106332
299.697	302.664	-0.106643
300.211	302.789	-0.106557
298.852	302.628	-0.106786
299.262	302.326	-0.106805
298.3	304.146	-0.10653
297.975	303.563	-0.106729
298.286	303.197	-0.10675
298.339	302.686	-0.106883
294.787	305.001	-0.107081
294.247	304.647	-0.107264
295.826	304.055	-0.107072
295.863	303.292	-0.10726
296.127	303.68	-0.10711
294.353	302.623	-0.107807
294.765	302.303	-0.107827
293.8	304.146	-0.107482
293.475	303.563	-0.107734
293.786	303.197	-0.107761
293.839	302.686	-0.107928
290.287	305.001	-0.108065
289.747	304.647	-0.108233
291.326	304.055	-0.108114
291.363	303.292	-0.108339
291.627	303.68	-0.10817
289.853	302.623	-0.108853
290.265	302.303	-0.108914
289.3	304.146	-0.108437
288.975	303.563	-0.108673
289.286	303.197	-0.108744
289.339	302.686	-0.108931
285.787	305.001	-0.1084
285.247	304.647	-0.108434
286.826	304.055	-0.108691
286.863	303.292	-0.10893
287.127	303.68	-0.108812
285.347	302.618	-0.109079
285.78	302.298	-0.10925
284.8	304.146	-0.108517
284.476	303.576	-0.108651
284.785	303.203	-0.108812
284.839	302.686	-0.109008
281.553	304.786	-0.107613
281.708	302.6	-0.108297
282.227	302.646	-0.108442
280.871	302.587	-0.10806
281.298	302.279	-0.108297
304.757	307.636	-0.105908
305.109	308.221	-0.105959
304.735	308.709	-0.10592
307.252	309.046	-0.106348
307.214	308.534	-0.106298
306.932	308.063	-0.106241
307.294	307.674	-0.106293
307.513	307.172	-0.106344
307.966	307.155	-0.106428
308.42	306.871	-0.106536
308.781	307.177	-0.106602
309.303	307.289	-0.106738
309.341	307.794	-0.106736
309.621	308.241	-0.10683
309.222	308.703	-0.106742
311.752	309.046	-0.10748
311.714	308.534	-0.107416
311.432	308.063	-0.107322
311.794	307.674	-0.1074
312.013	307.172	-0.107463
312.466	307.155	-0.107582
312.92	306.871	-0.10772
313.281	307.177	-0.107809
313.803	307.289	-0.107972
313.841	307.794	-0.107976
314.121	308.241	-0.108089
313.722	308.703	-0.107991
316.252	309.046	-0.1088
316.214	308.534	-0.108729
315.932	308.063	-0.10863
316.294	307.674	-0.108704
316.513	307.172	-0.10876
316.966	307.155	-0.108867
317.42	306.871	-0.108986
317.781	307.177	-0.109056
318.303	307.289	-0.109181
318.341	307.794	-0.109186
318.621	308.241	-0.109274
318.222	308.703	-0.109218
320.752	309.046	-0.109637
320.714	308.534	-0.109572
320.432	308.063	-0.109528
320.794	307.674	-0.109528
321.013	307.172	-0.109537
321.466	307.155	-0.109542
321.92	306.871	-0.109548
322.281	307.177	-0.109526
322.803	307.289	-0.109506
322.841	307.794	-0.109503
323.121	308.241	-0.109507
322.722	308.703	-0.109568
325.217	309.055	-0.109215
325.214	308.534	-0.109155
324.932	308.063	-0.109195
325.294	307.669	-0.109096
325.442	307.148	-0.10907
325.866	307.071	-0.108963
326.217	306.656	-0.108899
326.805	306.893	-0.108741
304.256	309.133	-0.105891
303.641	309.489	-0.105877
303.268	309.138	-0.105831
302.753	308.985	-0.10582
302.724	308.501	-0.105794
303.414	307.17	-0.105829
303.821	306.896	-0.105865
304.305	307.227	-0.105876
302.485	308.032	-0.105796
302.814	307.683	-0.105797
302.948	307.198	-0.105822
299.288	309.483	-0.105974
298.747	309.147	-0.106006
300.309	307.666	-0.105873
299.709	307.138	-0.105943
300.21	307.201	-0.105913
298.866	307.131	-0.106033
299.288	306.844	-0.106015
298.3	308.646	-0.106049
297.978	308.071	-0.106112
298.299	307.699	-0.106075
298.373	307.179	-0.106108
294.789	309.467	-0.10669
294.247	309.147	-0.106771
295.81	307.662	-0.106504
295.205	307.144	-0.106652
295.697	307.196	-0.106569
294.366	307.131	-0.106815
294.788	306.844	-0.106771
293.8	308.646	-0.106848
293.478	308.071	-0.106939
293.799	307.699	-0.106884
293.873	307.179	-0.106925
290.289	309.467	-0.107606
289.747	309.147	-0.107668
291.31	307.662	-0.107438
290.705	307.144	-0.107592
291.197	307.196	-0.10751
289.866	307.131	-0.107733
290.288	306.844	-0.107708
289.3	308.646	-0.107725
288.978	308.071	-0.107793
289.299	307.699	-0.107767
289.373	307.179	-0.107816
285.789	309.468	-0.107918
285.247	309.147	-0.107851
286.81	307.662	-0.107979
286.205	307.144	-0.108012
286.697	307.196	-0.108032
285.366	307.131	-0.107957
285.788	306.844	-0.108036
284.8	308.646	-0.107795
284.48	308.074	-0.107778
284.798	307.7	-0.107843
284.873	307.179	-0.107911
281.747	307.084	-0.107226
282.266	307.14	-0.107375
280.751	306.893	-0.106969
281.354	306.672	-0.107182
304.757	298.636	-0.107302
305.114	299.22	-0.107193
304.752	299.708	-0.107043
308.787	300.124	-0.107595
308.161	300.467	-0.107382
307.782	300.17	-0.107362
307.252	300.046	-0.107299
307.214	299.534	-0.107396
306.932	299.063	-0.107467
307.305	298.654	-0.107623
307.482	298.066	-0.107817
308.845	298.176	-0.10809
309.303	298.289	-0.108201
309.345	298.786	-0.108066
309.619	299.25	-0.108038
309.234	299.702	-0.107807
313.287	300.124	-0.108984
312.661	300.467	-0.108701
312.282	300.17	-0.108653
311.752	300.046	-0.108528
311.714	299.534	-0.108639
311.432	299.063	-0.108679
311.805	298.654	-0.108905
311.982	298.066	-0.109139
313.345	298.176	-0.109559
313.803	298.289	-0.109696
313.845	298.786	-0.109545
314.119	299.25	-0.109511
313.734	299.702	-0.109241
317.787	300.124	-0.110326
317.161	300.467	-0.110087
316.782	300.17	-0.110072
316.252	300.046	-0.109976
316.214	299.534	-0.110107
315.932	299.063	-0.110175
316.305	298.654	-0.1104
316.482	298.066	-0.110644
317.845	298.176	-0.110934
318.303	298.289	-0.111008
318.345	298.786	-0.110847
318.619	299.25	-0.110768
318.234	299.702	-0.110546
322.287	300.124	-0.110738
321.661	300.467	-0.110683
321.282	300.17	-0.110765
320.752	300.046	-0.110801
320.714	299.534	-0.110936
320.432	299.063	-0.111066
320.805	298.654	-0.111191
320.982	298.066	-0.111372
322.345	298.176	-0.111272
322.803	298.289	-0.111204
322.845	298.786	-0.111051
323.12	299.247	-0.110896
322.733	299.701	-0.110813
325.239	300.04	-0.110247
325.214	299.534	-0.110368
324.932	299.063	-0.110565
325.274	298.672	-0.110571
325.388	298.14	-0.110689
325.868	298.073	-0.110565
326.22	297.65	-0.110586
326.808	297.889	-0.11036
304.309	300.147	-0.106925
302.752	300.046	-0.10698
302.723	299.5	-0.107102
303.34	298.095	-0.107429
[truncated: 4,673 more rows]
